# Supplementary material for: Bifurcation and Limit Cycle of a Ratio-dependent Predator-prey, System with Refuge on Prey
Source: Royal Society of Chemistry journal article supplement (doi:10.1039/d3cc00442b), 2013-01-01
Supplement: d3cc00442b1.pdf [file d3cc00442b1.pdf]

**Electronic Supplementary Information**  
**for**  
**Palladium-catalyzed synthesis of benzosilacyclobutenes**  
**via position-selective C(sp<sup>3</sup>)-H arylation**

Naoya Hamada,<sup>†</sup> Daigo Hayashi<sup>†</sup> and Ryo Shintani<sup>\*,†,‡</sup>

<sup>†</sup>*Division of Chemistry, Department of Materials Engineering Science, Graduate School of Engineering Science, Osaka University, Toyonaka, Osaka 560-8531, Japan*

<sup>‡</sup>*Innovative Catalysis Science Division, Institute for Open and Transdisciplinary Research Initiatives (ICS-OTRI), Osaka University, Suita, Osaka 565-0871, Japan*

|                                                        |             |
|--------------------------------------------------------|-------------|
| <b>I. General</b>                                      | <b>S2</b>   |
| <b>II. Synthesis of Substrates</b>                     | <b>S3</b>   |
| <b>III. Catalytic Reactions and Derivatizations</b>    | <b>S19</b>  |
| <b>IV. X-ray Crystal Structures</b>                    | <b>S33</b>  |
| <b>V. <sup>1</sup>H and <sup>13</sup>C NMR Spectra</b> | <b>S41</b>  |
| <b>VI. References</b>                                  | <b>S147</b> |

## I. General

All reactions were carried out with standard Schlenk techniques under nitrogen unless otherwise noted. NMR spectra were recorded on JEOL JNM-ECS400 or Agilent Unity-Inova500 spectrometer. High resolution mass spectra were recorded on JEOL JMS700 or JEOL JMS-T100LP AccuTOF (DART-MS) spectrometer. X-ray crystallographic analysis was performed by RIGAKU XTaLAB P200 with graphite-monochromated Mo-K $\alpha$  (0.71075 Å) radiation. Preparative GPC was performed with JAI LaboACE LC-5060 equipped with JAIGEL-2HR columns using CHCl<sub>3</sub> as an eluent.

Et<sub>2</sub>NH (Wako Chemicals) was distilled over KOH under vacuum. CCl<sub>4</sub> (Wako Chemicals) was dried over MgSO<sub>4</sub> and degassed by purging nitrogen prior to use. Li turnings were prepared by pounding and cutting Li wire (Kishida Chemical) prior to use. DMF (Wako Chemicals; dehydrated), THF (Kanto Chemical; dehydrated), Et<sub>2</sub>O (Wako Chemicals; dehydrated), toluene (Wako Chemicals; dehydrated), 1-bromo-2-naphthol (Aldrich or BLD Pharmatech), 1-iodo-3-phenylpropane (Aldrich), iodomethane-*d*<sub>3</sub> (CIL), benzaldehyde (Wako Chemicals), cinnamaldehyde (Wako Chemicals), dimethyl acetylenedicarboxylate (Aldrich), diethyl acetylenedicarboxylate (Aldrich), methyl propiolate (TCI), dicyclohexyldichlorosilane (BLD Pharmatech), trichloro(propyl)silane (TCI), dichloro(ethyl)(methyl)silane (Thermo Scientific), imidazole (Nacalai Tesque), *N*-phenylbis(trifluoromethanesulfonimide) (Kanto Chemical, TCI, or Angene), PPh<sub>3</sub> (Wako Chemicals), PCy<sub>3</sub>•HBF<sub>4</sub> (TCI), P(*t*Bu)<sub>3</sub>•HBF<sub>4</sub> (TCI), (±)-2,2'-bis(diphenylphosphino)-1,1'-binaphthyl ((±)-binap; Wako Chemicals), 1,1'-bis(diphenylphosphino)ferrocene (dppf; TCI), 1,1'-bis(di-*tert*-butylphosphino)ferrocene (dtbpf; Wako Chemicals), *n*BuLi (Kanto Chemical; 1.52–1.59 M solution in hexane), *t*BuLi (Kanto Chemical; 1.60 M solution in pentane), NaH (Kishida Chemical; 60 wt% in mineral oil), PdCl<sub>2</sub> (Tanaka Kikinzoku), Pd(OAc)<sub>2</sub> (Wako Chemicals), and Ni(cod)<sub>2</sub> (Wako Chemicals) were used as received. 1-Bromo-2-(methoxymethoxy)naphthalene,<sup>1</sup> *tert*-butylchloro(methyl)silane,<sup>2</sup> and Pd(PPh<sub>3</sub>)<sub>4</sub>,<sup>3</sup> were synthesized following the literature procedures.

## II. Synthesis of Substrates

### Representative Procedures for Substrates:

#### 1-(Butyldicyclohexylsilyl)-2-naphthyl trifluoromethanesulfonate (1a)

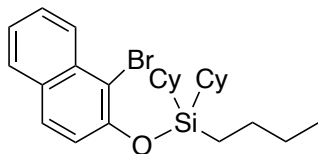

*n*BuLi (2.77 mL, 4.40 mmol; 1.59 M solution in hexane) was added dropwise over 10 min to a solution of dicyclohexyldichlorosilane (1.06 mL, 4.40 mmol) in THF (8.0 mL) at  $-78$  °C. The mixture was stirred for 30 min at  $-78$  °C, warmed to room temperature gradually over 30 min, and further stirred for 1 h at room temperature. 1-Bromo-2-naphthol (898 mg, 4.02 mmol) and imidazole (557 mg, 8.18 mmol) were added to it with the aid of THF (1.5 mL), and the mixture was stirred for 20 h at 35 °C. The reaction was slowly quenched with saturated  $\text{NH}_4\text{Cl}$  at room temperature and this was extracted with  $\text{Et}_2\text{O}$ . The organic layer was washed with saturated  $\text{NaCl}$  aq, dried over  $\text{MgSO}_4$ , filtered, and concentrated under vacuum. The residue was chromatographed on silica gel with hexane/ $\text{EtOAc}$  = 50/1 to afford (1-bromo-2-naphthoxy)(butyl)dicyclohexylsilane as a colorless oil (1.82 g, 3.72 mmol; 93% yield).

$^1\text{H}$  NMR ( $\text{CDCl}_3$ ):  $\delta$  8.21 (d,  $^3J_{\text{HH}} = 8.3$  Hz, 1H), 7.76 (d,  $^3J_{\text{HH}} = 8.3$  Hz, 1H), 7.68 (d,  $^3J_{\text{HH}} = 8.7$  Hz, 1H), 7.54 (ddd,  $^3J_{\text{HH}} = 8.2$  and 6.9 Hz and  $^4J_{\text{HH}} = 1.4$  Hz, 1H), 7.38 (ddd,  $^3J_{\text{HH}} = 7.8$  and 6.9 Hz and  $^4J_{\text{HH}} = 1.4$  Hz, 1H), 7.11 (d,  $^3J_{\text{HH}} = 8.7$  Hz, 1H), 1.89-1.78 (m, 4H), 1.78-1.67 (m, 6H), 1.46-1.17 (m, 14H), 1.10 (tt,  $^3J_{\text{HH}} = 12.6$  and 2.7 Hz, 2H), 0.93-0.83 (m, 5H).

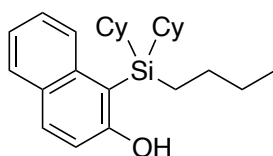

*n*BuLi (2.34 mL, 3.72 mmol; 1.59 M solution in hexane) was added dropwise over 5 min to a solution of (1-bromo-2-naphthoxy)(butyl)dicyclohexylsilane (1.82 g, 3.72 mmol) in THF (9.4 mL) at  $-78$  °C. The reaction mixture was stirred for 1 h at  $-78$  °C and for 1 h at room temperature. The reaction was quenched with  $\text{H}_2\text{O}$  and this was extracted with  $\text{Et}_2\text{O}$ . The organic layer was washed with saturated  $\text{NaCl}$  aq, dried over  $\text{MgSO}_4$ , filtered, and concentrated under vacuum. The residue was chromatographed on silica gel with hexane/ $\text{EtOAc}$  = 5/1 to afford 1-(butyldicyclohexylsilyl)-2-naphthol as a yellow oil (1.57 g, 3.67 mmol; 99% yield).

$^1\text{H}$  NMR ( $\text{CDCl}_3$ ):  $\delta$  8.03 (d,  $^3J_{\text{HH}} = 8.8$  Hz, 1H), 7.76-7.69 (m, 2H), 7.40 (ddd,  $^3J_{\text{HH}} = 8.5$  and 6.8 Hz and  $^4J_{\text{HH}} = 1.4$  Hz, 1H), 7.29 (ddd,  $^3J_{\text{HH}} = 8.0$  and 6.8 Hz and  $^4J_{\text{HH}} = 0.9$  Hz, 1H), 6.93 (d,  $^3J_{\text{HH}} = 8.8$  Hz, 1H), 5.28 (s, 1H), 1.94-1.85 (m, 2H), 1.79-1.09 (m, 26H), 0.90 (t,  $^3J_{\text{HH}} = 7.3$  Hz, 3H).

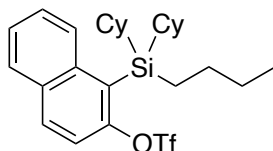

NaH (163 mg, 4.07 mmol; 60 wt% in mineral oil) was added to a solution of 1-(butyldicyclohexylsilyl)-2-naphthol (1.57 g, 3.67 mmol) in THF (18 mL) at 0 °C, and the reaction mixture was stirred for 20 min at 0 °C. *N*-Phenylbis(trifluoromethanesulfonimide) (1.41 g, 3.94 mmol) was added to it, and the mixture was stirred for 5 min at 0 °C and for 1 h at room temperature. The reaction was quenched with H<sub>2</sub>O and this was extracted with Et<sub>2</sub>O. The organic layer was washed with saturated NaCl<sub>aq</sub>, dried over MgSO<sub>4</sub>, filtered, and concentrated under vacuum. The residue was chromatographed on silica gel with hexane to afford compound **1a** as a white solid (1.69 g, 3.20 mmol; 87% yield).

<sup>1</sup>H NMR (CDCl<sub>3</sub>): δ 8.27-8.20 (m, 1H), 7.90 (d, <sup>3</sup>J<sub>HH</sub> = 9.2 Hz, 1H), 7.90-7.83 (m, 1H), 7.58-7.49 (m, 2H), 7.39 (d, <sup>3</sup>J<sub>HH</sub> = 8.7 Hz, 1H), 1.97-1.85 (m, 2H), 1.83-1.07 (m, 26H), 0.89 (d, <sup>3</sup>J<sub>HH</sub> = 7.1 Hz, 3H). <sup>13</sup>C{<sup>1</sup>H} NMR (CDCl<sub>3</sub>): δ 154.4, 138.7, 132.5, 132.2, 129.03, 129.01, 126.6, 126.4, 126.3, 118.8 (q, <sup>5</sup>J<sub>CF</sub> = 1.9 Hz), 118.7 (q, <sup>1</sup>J<sub>CF</sub> = 320 Hz), 29.2, 28.9, 28.6, 28.5, 27.13, 27.06, 26.9, 26.8, 13.8, 11.9. <sup>29</sup>Si{<sup>1</sup>H} NMR (CDCl<sub>3</sub>): δ 0.9. HRMS (DART) calcd for C<sub>27</sub>H<sub>38</sub>F<sub>3</sub>O<sub>3</sub>SSi (M+H<sup>+</sup>) 527.2258, found: 527.2271.

### 1-(Dicyclohexyl(3-phenylpropyl)silyl)-2-naphthyl trifluoromethanesulfonate (**1c**)

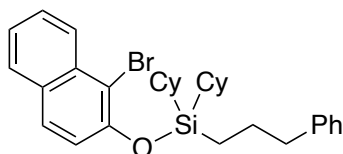

*t*BuLi (5.50 mL, 8.80 mmol; 1.60 M solution in pentane) was added dropwise over 15 min to a solution of 1-iodo-3-phenylpropane (707 μL, 4.40 mmol) in Et<sub>2</sub>O (22 mL) at -78 °C, and the mixture was stirred for 1 h at -78 °C. Dicyclohexyldichlorosilane (1.06 mL, 4.40 mmol) was added to it and the mixture was stirred for 30 min at -78 °C. This was then warmed to room temperature gradually over 30 min and further stirred for 1 h at room temperature. 1-Bromo-2-naphthol (896 mg, 4.01 mmol) and imidazole (566 mg, 8.32 mmol) were added to it with the aid of THF (2.5 mL), and the mixture was stirred for 43 h at 35 °C. The reaction was slowly quenched with saturated NH<sub>4</sub>Cl<sub>aq</sub> at room temperature and this was extracted with Et<sub>2</sub>O. The organic layer was washed with saturated NaCl<sub>aq</sub>, dried over MgSO<sub>4</sub>, filtered, and concentrated under vacuum. The residue was chromatographed on silica gel with hexane/EtOAc = 30/1 to afford (1-bromo-2-naphthoxy)dicyclohexyl(3-phenylpropyl)silane as a red oil (2.11 g, 3.93 mmol; 98% yield).

<sup>1</sup>H NMR (CDCl<sub>3</sub>): δ 8.23 (d, <sup>3</sup>J<sub>HH</sub> = 8.2 Hz, 1H), 7.78 (d, <sup>3</sup>J<sub>HH</sub> = 7.8 Hz, 1H), 7.66 (d, <sup>3</sup>J<sub>HH</sub> = 8.7 Hz, 1H), 7.56 (ddd, <sup>3</sup>J<sub>HH</sub> = 8.7 and 6.8 Hz and <sup>4</sup>J<sub>HH</sub> = 0.9 Hz, 1H), 7.40 (ddd, <sup>3</sup>J<sub>HH</sub> = 8.2 and 6.9 Hz and <sup>4</sup>J<sub>HH</sub> = 0.9 Hz, 1H), 7.28-7.22 (m, 2H), 7.21-7.15 (m, 1H), 7.15-7.08 (m, 2H), 7.05 (d, <sup>3</sup>J<sub>HH</sub> = 9.2

Hz, 1H), 2.63 (t,  $^3J_{\text{HH}} = 7.3$  Hz, 2H), 1.90-1.63 (m, 12H), 1.42-1.16 (m, 10H), 1.11 (tt,  $^3J_{\text{HH}} = 12.4$  and 2.7 Hz, 2H), 0.96-0.87 (m, 2H).

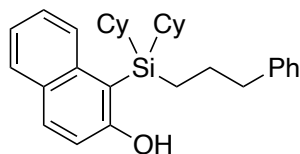

*n*BuLi (2.50 mL, 3.93 mmol; 1.57 M solution in hexane) was added dropwise over 5 min to a solution of (1-bromo-2-naphthoxy)dicyclohexyl(3-phenylpropyl)silane (2.11 g, 3.93 mmol) in THF (9.7 mL) at  $-78$  °C. The reaction mixture was stirred for 1 h at  $-78$  °C and for 1 h at room temperature. The reaction was quenched with H<sub>2</sub>O and this was extracted with Et<sub>2</sub>O. The organic layer was washed with saturated NaCl<sub>aq</sub>, dried over MgSO<sub>4</sub>, filtered, and concentrated under vacuum. The residue was chromatographed on silica gel with hexane/EtOAc = 30/1 → 20/1 and again with hexane/EtOAc = 30/1 → 20/1 → 10/1 to afford 1-dicyclohexyl(3-phenylpropyl)silyl-2-naphthol as a pale green oil (761 mg, 1.67 mmol; 42% yield).

<sup>1</sup>H NMR (CDCl<sub>3</sub>): δ 7.99 (d,  $^3J_{\text{HH}} = 8.5$  Hz, 1H), 7.75-7.69 (m, 2H), 7.37 (ddd,  $^3J_{\text{HH}} = 8.5$  and 6.8 Hz and  $^4J_{\text{HH}} = 1.2$  Hz, 1H), 7.32-7.25 (m, 3H), 7.20-7.13 (m, 3H), 6.89 (d,  $^3J_{\text{HH}} = 8.8$  Hz, 1H), 4.98 (s, 1H), 2.68 (t,  $^3J_{\text{HH}} = 7.3$  Hz, 2H), 1.89-1.57 (m, 12H), 1.38-1.09 (m, 14H).

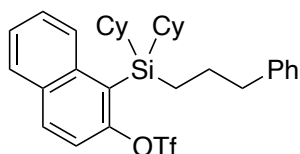

NaH (75.5 mg, 1.89 mmol; 60 wt% in mineral oil) was added to a solution of 1-dicyclohexyl(3-phenylpropyl)silyl-2-naphthol (761 mg, 1.67 mmol) in THF (8.5 mL) at 0 °C, and the reaction mixture was stirred for 20 min at 0 °C. *N*-Phenylbis(trifluoromethanesulfonimide) (655 mg, 1.88 mmol) was added to it, and the mixture was stirred for 5 min at 0 °C and for 1.5 h at room temperature. The reaction was quenched with H<sub>2</sub>O and this was extracted with Et<sub>2</sub>O. The organic layer was washed with saturated NaCl<sub>aq</sub>, dried over MgSO<sub>4</sub>, filtered, and concentrated under vacuum. The residue was chromatographed on silica gel with hexane/EtOAc = 30/1 and again with hexane/EtOAc = 50/1 to afford compound **1c** as a white solid (495 mg, 0.841 mmol; 50% yield).

<sup>1</sup>H NMR (CDCl<sub>3</sub>): δ 8.29-8.20 (m, 1H), 7.93 (d,  $^3J_{\text{HH}} = 9.2$  Hz, 1H), 7.92-7.86 (m, 1H), 7.60-7.53 (m, 2H), 7.45 (d,  $^3J_{\text{HH}} = 8.7$  Hz, 1H), 7.32 (t,  $^3J_{\text{HH}} = 7.3$  Hz, 2H), 7.25-7.17 (m, 3H), 2.74 (t,  $^3J_{\text{HH}} = 7.6$  Hz, 2H), 2.03-1.89 (m, 2H), 1.87-1.42 (m, 12H), 1.42-1.12 (m, 12H). <sup>13</sup>C{<sup>1</sup>H} NMR (CDCl<sub>3</sub>): δ 154.4, 142.6, 138.7, 132.7, 132.2, 129.0, 128.9, 128.7, 128.4, 126.7, 126.4, 126.1, 125.8, 118.8 (q,  $^5J_{\text{CF}} = 1.9$  Hz), 118.7 (q,  $^1J_{\text{CF}} = 320$  Hz), 40.4, 29.1, 28.9, 28.49, 28.46, 27.01, 26.99, 26.7, 12.0. <sup>29</sup>Si{<sup>1</sup>H} NMR (CDCl<sub>3</sub>): δ 0.8. HRMS (DART) calcd for C<sub>32</sub>H<sub>40</sub>F<sub>3</sub>O<sub>3</sub>SSi (M+H<sup>+</sup>) 589.2414, found: 589.2404.

**1-(Bis(2-(methoxymethoxy)-1-naphthyl)(propyl)silyl)-2-naphthyl trifluoromethanesulfonate (1h)**

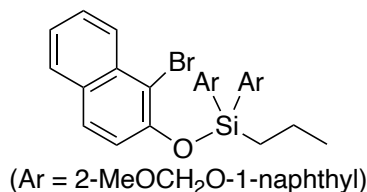

*t*BuLi (36.0 mL, 57.6 mmol; 1.60 M solution in pentane) was added dropwise over 15 min to a solution of 1-bromo-2-(methoxymethoxy)naphthalene (7.82 g, 28.7 mmol) in THF (48 mL) at  $-78\text{ }^{\circ}\text{C}$ , and the mixture was stirred for 30 min at  $-78\text{ }^{\circ}\text{C}$ . Trichloro(propyl)silane (2.13 mL, 14.4 mmol) was added to it, and the mixture was stirred for 5 min at  $-78\text{ }^{\circ}\text{C}$  and for 3.5 h at room temperature. 1-Bromo-2-naphthol (2.69 g, 12.0 mmol) and imidazole (1.64 g, 24.0 mmol) were added to it with the aid of THF (6.0 mL), and the mixture was stirred for 41 h at  $35\text{ }^{\circ}\text{C}$ . The reaction was slowly quenched with saturated NH<sub>4</sub>Cl aq at room temperature and this was extracted with Et<sub>2</sub>O. The organic layer was washed with saturated NaCl aq, dried over MgSO<sub>4</sub>, filtered, and concentrated under vacuum. The residue was chromatographed on silica gel with hexane/EtOAc = 10/1  $\rightarrow$  8/1 to afford (1-bromo-2-naphthoxy)di(2-(methoxymethoxy)-1-naphthyl)(propyl)silane as a white amorphous (6.50 g, 9.73 mmol; 81% yield).

<sup>1</sup>H NMR (CDCl<sub>3</sub>):  $\delta$  9.06 (d, <sup>3</sup>J<sub>HH</sub> = 8.7 Hz, 2H), 8.23 (d, <sup>3</sup>J<sub>HH</sub> = 7.8 Hz, 1H), 7.81 (d, <sup>3</sup>J<sub>HH</sub> = 8.7 Hz, 2H), 7.77 (d, <sup>3</sup>J<sub>HH</sub> = 8.2 Hz, 2H), 7.62 (d, <sup>3</sup>J<sub>HH</sub> = 8.2 Hz, 1H), 7.54-7.43 (m, 3H), 7.40-7.29 (m, 4H), 7.27 (d, <sup>3</sup>J<sub>HH</sub> = 8.7 Hz, 2H), 7.06 (d, <sup>3</sup>J<sub>HH</sub> = 9.2 Hz, 1H), 4.73 (d, <sup>2</sup>J<sub>HH</sub> = 6.9 Hz, 2H), 4.70 (d, <sup>2</sup>J<sub>HH</sub> = 6.9 Hz, 2H), 2.88 (s, 6H), 1.81-1.72 (m, 2H), 1.57-1.45 (m, 2H), 0.88 (t, <sup>3</sup>J<sub>HH</sub> = 7.1 Hz, 3H).

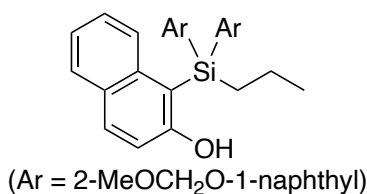

*n*BuLi (6.20 mL, 9.73 mmol; 1.57 M solution in hexane) was added dropwise over 5 min to a solution of (1-bromo-2-naphthoxy)di(2-(methoxymethoxy)-1-naphthyl)(propyl)silane (6.50 g, 9.73 mmol) in THF (26 mL) at  $-78\text{ }^{\circ}\text{C}$ . The reaction mixture was stirred for 1 h at  $-78\text{ }^{\circ}\text{C}$  and for 1 h at room temperature. The reaction was quenched with H<sub>2</sub>O and this was extracted with Et<sub>2</sub>O. The organic layer was washed with saturated NaCl aq, dried over MgSO<sub>4</sub>, filtered, and concentrated under vacuum. The residue was chromatographed on silica gel with hexane/EtOAc = 5/1 to afford 1-(bis(2-(methoxymethoxy)-1-naphthyl)(propyl)silyl)-2-naphthol as a white amorphous (5.38 g, 9.13 mmol; 94% yield).

<sup>1</sup>H NMR (CDCl<sub>3</sub>):  $\delta$  8.21-8.08 (m, 2H), 7.93-7.70 (m, 8H), 7.44-7.13 (m, 5H), 7.08-7.01 (m, 2H), 6.97 (d, <sup>3</sup>J<sub>HH</sub> = 8.8 Hz, 1H), 6.83 (s, 1H), 4.80-4.52 (m, 4H), 2.90 (s, 6H), 2.08-1.94 (m, 1H), 1.90-1.78 (m, 1H), 1.48-1.34 (m, 1H), 1.23-1.09 (m, 1H), 0.88 (t, <sup>3</sup>J<sub>HH</sub> = 7.2 Hz, 3H).

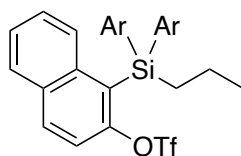

(Ar = 2-MeOCH<sub>2</sub>O-1-naphthyl)

NaH (400 mg, 9.13 mmol; 60 wt% in mineral oil) was added to a solution of 1-(bis(2-methoxymethoxy)-1-naphthyl)(propyl)silyl)-2-naphthol (5.38 g, 9.13 mmol) in THF (46 mL) at 0 °C, and the reaction mixture was stirred for 20 min at 0 °C. *N*-Phenylbis(trifluoromethanesulfonimide) (3.49 g, 9.77 mmol) was added to it, and the mixture was stirred for 5 min at 0 °C and for 3.5 h at room temperature. The reaction was quenched with H<sub>2</sub>O and this was extracted with Et<sub>2</sub>O. The organic layer was washed with saturated NaCl<sub>aq</sub>, dried over MgSO<sub>4</sub>, filtered, and concentrated under vacuum. The residue was chromatographed on silica gel with hexane/EtOAc = 8/1 to afford compound **1h** as a white amorphous (3.77 g, 5.22 mmol; 57% yield).

<sup>1</sup>H NMR (CDCl<sub>3</sub>): δ 8.08 (d, <sup>3</sup>J<sub>HH</sub> = 8.2 Hz, 1H), 8.01 (d, <sup>3</sup>J<sub>HH</sub> = 8.7 Hz, 1H), 7.97 (d, <sup>3</sup>J<sub>HH</sub> = 8.7 Hz, 1H), 7.93-7.84 (m, 3H), 7.84-7.74 (m, 3H), 7.41-7.33 (m, 4H), 7.30-7.19 (m, 2H), 7.14 (ddd, <sup>3</sup>J<sub>HH</sub> = 8.7 and 6.9 Hz and <sup>4</sup>J<sub>HH</sub> = 1.4 Hz, 1H), 7.03 (ddd, <sup>3</sup>J<sub>HH</sub> = 9.2 and 6.9 Hz and <sup>4</sup>J<sub>HH</sub> = 1.4 Hz, 1H), 7.00 (ddd, <sup>3</sup>J<sub>HH</sub> = 8.7 and 6.9 Hz and <sup>4</sup>J<sub>HH</sub> = 1.4 Hz, 1H), 4.52 (d, <sup>2</sup>J<sub>HH</sub> = 7.3 Hz, 1H), 4.42 (d, <sup>2</sup>J<sub>HH</sub> = 7.3 Hz, 1H), 4.40 (d, <sup>2</sup>J<sub>HH</sub> = 6.9 Hz, 1H), 4.35 (d, <sup>2</sup>J<sub>HH</sub> = 7.3 Hz, 1H), 2.83 (s, 3H), 2.81 (s, 3H), 1.91-1.73 (m, 2H), 1.43-1.24 (m, 2H), 0.89 (t, <sup>3</sup>J<sub>HH</sub> = 7.3 Hz, 3H). <sup>13</sup>C {<sup>1</sup>H} NMR (CDCl<sub>3</sub>): δ 161.73, 161.69, 152.6, 138.6, 138.3, 138.2, 133.0, 132.1, 131.9, 131.4, 130.24, 130.20, 130.0, 129.8, 128.6, 128.5, 128.2, 128.0, 126.1, 126.0, 125.94, 125.85, 123.42, 123.39, 120.02, 119.99, 118.7 (q, <sup>5</sup>J<sub>CF</sub> = 1.9 Hz), 118.3 (q, <sup>1</sup>J<sub>CF</sub> = 320 Hz), 115.3, 115.2, 94.8, 94.6, 55.5, 55.4, 23.2, 19.3, 18.4. <sup>29</sup>Si {<sup>1</sup>H} NMR (CDCl<sub>3</sub>): δ -19.9. HRMS (FAB) calcd for C<sub>38</sub>H<sub>35</sub>F<sub>3</sub>O<sub>7</sub>SSi (M<sup>+</sup>) 720.1825, found: 720.1833.

### 1-(*tert*-Butyl(ethyl)(methyl)silyl)-2-naphthyl trifluoromethanesulfonate (**1s**)

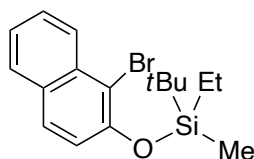

*t*BuLi (5.50 mL, 8.80 mmol; 1.60 M solution in pentane) was added dropwise over 15 min to a solution of dichloro(ethyl)(methyl)silane (592 μL, 4.40 mmol) in Et<sub>2</sub>O (3.5 mL) at 0 °C, and the mixture was stirred for 17 h while gradually raising the temperature to room temperature. 1-Bromo-2-naphthol (892 mg, 4.00 mmol) and imidazole (553 mg, 8.12 mmol) were added to it with the aid of THF (2.0 mL), and the mixture was stirred for 4 h at 40 °C. The reaction was quenched with H<sub>2</sub>O at room temperature and this was extracted with Et<sub>2</sub>O. The organic layer was washed with saturated NaCl<sub>aq</sub>, dried over MgSO<sub>4</sub>, filtered, and concentrated under vacuum. The residue was chromatographed on silica gel with hexane/EtOAc = 50/1 to afford (1-bromo-2-naphthoxy)(*tert*-butyl)(ethyl)(methyl)silane as a colorless oil (855 mg, 2.44 mmol; 61% yield).

$^1\text{H}$  NMR ( $\text{CDCl}_3$ ):  $\delta$  8.21 (d,  $^3J_{\text{HH}} = 8.7$  Hz, 1H), 7.76 (d,  $^3J_{\text{HH}} = 7.4$  Hz, 1H), 7.69 (d,  $^3J_{\text{HH}} = 8.7$  Hz, 1H), 7.54 (ddd,  $^3J_{\text{HH}} = 8.7$  and 6.9 Hz and  $^4J_{\text{HH}} = 1.4$  Hz, 1H), 7.38 (ddd,  $^3J_{\text{HH}} = 8.2$  and 6.9 Hz and  $^4J_{\text{HH}} = 0.9$  Hz, 1H), 7.13 (d,  $^3J_{\text{HH}} = 8.7$  Hz, 1H), 1.09 (s, 9H), 1.00 (t,  $^3J_{\text{HH}} = 7.6$  Hz, 3H), 0.97-0.76 (m, 2H), 0.32 (s, 3H).

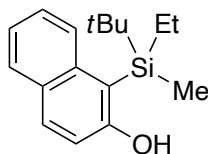

$n\text{BuLi}$  (1.60 mL, 2.44 mmol; 1.52 M solution in hexane) was added dropwise over 5 min to a solution of (1-bromo-2-naphthoxy)(*tert*-butyl)(ethyl)(methyl)silane (855 mg, 2.44 mmol) in THF (6.1 mL) at  $-78$  °C. The reaction mixture was stirred for 1 h at  $-78$  °C and for 1 h at room temperature. The reaction was quenched with  $\text{H}_2\text{O}$  and this was extracted with  $\text{Et}_2\text{O}$ . The organic layer was washed with saturated  $\text{NaCl}$  aq, dried over  $\text{MgSO}_4$ , filtered, and concentrated under vacuum. The residue was chromatographed on silica gel with hexane/ $\text{EtOAc} = 5/1$  to afford 1-(*tert*-butyl(ethyl)(methyl)silyl)-2-naphthol as a red oil (684 mg, 2.10 mmol; 86% yield).

$^1\text{H}$  NMR ( $\text{CDCl}_3$ ):  $\delta$  8.05 (d,  $^3J_{\text{HH}} = 8.7$  Hz, 1H), 7.75 (d,  $^3J_{\text{HH}} = 8.7$  Hz, 1H), 7.74 (dd,  $^3J_{\text{HH}} = 8.2$  Hz and  $^4J_{\text{HH}} = 1.8$  Hz, 1H), 7.40 (ddd,  $^3J_{\text{HH}} = 8.7$  and 6.9 Hz and  $^4J_{\text{HH}} = 1.8$  Hz, 1H), 7.29 (ddd,  $^3J_{\text{HH}} = 8.2$  and 6.9 Hz and  $^4J_{\text{HH}} = 1.4$  Hz, 1H), 6.95 (d,  $^3J_{\text{HH}} = 8.7$  Hz, 1H), 5.19 (s, 1H), 1.44-1.32 (m, 1H), 1.00 (s, 9H), 0.96-0.79 (m, 4H), 0.58 (s, 3H).

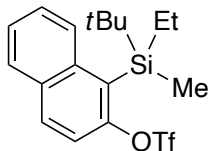

$\text{NaH}$  (92.4 mg, 2.31 mmol; 60 wt% in mineral oil) was added to a solution of 1-(*tert*-butyl(ethyl)(methyl)silyl)-2-naphthol (684 mg, 2.10 mmol) in THF (10 mL) at 0 °C, and the reaction mixture was stirred for 20 min at 0 °C. *N*-Phenylbis(trifluoromethanesulfonimide) (825 mg, 2.31 mmol) was added to it, and the mixture was stirred for 5 min at 0 °C and for 1 h at room temperature. The reaction was quenched with  $\text{H}_2\text{O}$  and this was extracted with  $\text{Et}_2\text{O}$ . The organic layer was washed with saturated  $\text{NaCl}$  aq, dried over  $\text{MgSO}_4$ , filtered, and concentrated under vacuum. The residue was chromatographed on silica gel with hexane/ $\text{EtOAc} = 100/1$  to afford compound **1s** as a white solid (778 mg, 1.92 mmol; 92% yield).

$^1\text{H}$  NMR ( $\text{CDCl}_3$ ):  $\delta$  8.28 (d,  $^3J_{\text{HH}} = 8.2$  Hz, 1H), 7.95 (d,  $^3J_{\text{HH}} = 9.2$  Hz, 1H), 7.92-7.84 (m, 1H), 7.60-7.50 (m, 3H), 1.54-1.38 (m, 1H), 1.06 (s, 9H), 0.98-0.86 (m, 4H), 0.65 (s, 3H).  $^{13}\text{C}\{^1\text{H}\}$  NMR ( $\text{CDCl}_3$ ):  $\delta$  155.4, 138.6, 133.0, 132.2, 129.8, 129.0, 126.7, 126.2, 125.1, 118.8 (q,  $^1J_{\text{CF}} = 320$  Hz), 117.8 (q,  $^5J_{\text{CF}} = 2.4$  Hz), 28.0, 19.3, 8.2, 7.6,  $-1.9$ .  $^{29}\text{Si}\{^1\text{H}\}$  NMR ( $\text{CDCl}_3$ ):  $\delta$  7.9. HRMS (FAB) calcd for  $\text{C}_{18}\text{H}_{24}\text{F}_3\text{O}_3\text{SSi}$  ( $\text{M}+\text{H}^+$ ) 405.1162, found: 405.1165.



### 1-(Dicyclohexyl(methyl-*d*<sub>3</sub>)silyl)-2-naphthyl trifluoromethanesulfonate (1q-*d*<sub>3</sub>)

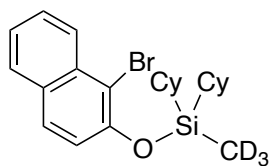

A mixture of Li turnings (134 mg, 20.0 mmol) and iodomethane-*d*<sub>3</sub> (318  $\mu$ L, 5.00 mmol) in Et<sub>2</sub>O (10 mL) was cooled to 0 °C and sonicated for 1.5 h at 0 °C to give a 0.42 M solution of methyllithium-*d*<sub>3</sub> (determined by acid–base titration). The resulting mixture (except for unreacted Li) was then added dropwise over 15 min to a solution of dicyclohexyldichlorosilane (1.06 mL, 4.40 mmol) in THF (3.0 mL) at –78 °C. The mixture was stirred for 30 min at –78 °C, warmed to room temperature gradually over 30 min, and further stirred for 1.5 h at room temperature. 1-Bromo-2-naphthol (900 mg, 4.03 mmol) and imidazole (567 mg, 8.18 mmol) were added to it with the aid of THF (3.0 mL), and the mixture was stirred for 16 h at 35 °C. The reaction was slowly quenched with saturated NH<sub>4</sub>Cl aq at room temperature and this was extracted with Et<sub>2</sub>O. The organic layer was washed with saturated NaCl aq, dried over MgSO<sub>4</sub>, filtered, and concentrated under vacuum. The residue was chromatographed on silica gel with hexane/EtOAc = 50/1 to afford (1-bromo-2-naphthoxy)dicyclohexyl(methyl-*d*<sub>3</sub>)silane as a colorless oil (1.52 g, 3.41 mmol; 85% yield).

<sup>1</sup>H NMR (CDCl<sub>3</sub>):  $\delta$  8.20 (d, <sup>3</sup>*J*<sub>HH</sub> = 9.2 Hz, 1H), 7.76 (d, <sup>3</sup>*J*<sub>HH</sub> = 8.3 Hz, 1H), 7.68 (d, <sup>3</sup>*J*<sub>HH</sub> = 8.7 Hz, 1H), 7.54 (ddd, <sup>3</sup>*J*<sub>HH</sub> = 8.7 and 6.9 Hz and <sup>4</sup>*J*<sub>HH</sub> = 1.4 Hz, 1H), 7.38 (ddd, <sup>3</sup>*J*<sub>HH</sub> = 8.2 and 6.9 Hz and <sup>4</sup>*J*<sub>HH</sub> = 1.4 Hz, 1H), 7.10 (d, <sup>3</sup>*J*<sub>HH</sub> = 8.7 Hz, 1H), 1.88-1.65 (m, 10H), 1.42-1.15 (m, 10H), 1.04 (tt, <sup>3</sup>*J*<sub>HH</sub> = 12.6 and 3.0 Hz, 2H).

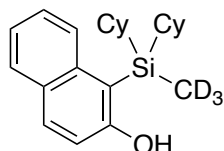

*n*BuLi (2.50 mL, 3.93 mmol; 1.57 M solution in hexane) was added dropwise over 5 min to a solution of (1-bromo-2-naphthoxy)dicyclohexyl(methyl-*d*<sub>3</sub>)silane (1.52 g, 3.41 mmol) in THF (8.6 mL) at –78 °C. The reaction mixture was stirred for 1 h at –78 °C and for 1 h at room temperature. The reaction was quenched with H<sub>2</sub>O and this was extracted with Et<sub>2</sub>O. The organic layer was washed with saturated NaCl aq, dried over MgSO<sub>4</sub>, filtered, and concentrated under vacuum. The residue was chromatographed on silica gel with hexane/EtOAc = 5/1 to afford 1-dicyclohexyl(methyl-*d*<sub>3</sub>)silyl-2-naphthol as a red oil (1.30 g, 3.38 mmol; 99% yield).

<sup>1</sup>H NMR (CDCl<sub>3</sub>):  $\delta$  8.02 (d, <sup>3</sup>*J*<sub>HH</sub> = 8.7 Hz, 1H), 7.77-7.69 (m, 2H), 7.41 (ddd, <sup>3</sup>*J*<sub>HH</sub> = 8.7 and 6.9 Hz and <sup>4</sup>*J*<sub>HH</sub> = 1.8 Hz, 1H), 7.30 (ddd, <sup>3</sup>*J*<sub>HH</sub> = 8.2 and 6.9 Hz and <sup>4</sup>*J*<sub>HH</sub> = 0.9 Hz, 1H), 6.93 (d, <sup>3</sup>*J*<sub>HH</sub> = 8.7 Hz, 1H), 5.30 (s, 1H), 1.94-1.84 (m, 2H), 1.80-1.03 (m, 20H).

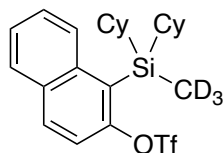

NaH (150 mg, 3.75 mmol; 60 wt% in mineral oil) was added to a solution of 1-dicyclohexyl(methyl-*d*<sub>3</sub>)silyl-2-naphthol (1.30 g, 3.38 mmol) in THF (16.6 mL) at 0 °C, and the reaction mixture was stirred for 20 min at 0 °C. *N*-Phenylbis(trifluoromethanesulfonimide) (1.30 g, 3.64 mmol) was added to it, and the mixture was stirred for 5 min at 0 °C and for 1 h at room temperature. The reaction was quenched with H<sub>2</sub>O and this was extracted with Et<sub>2</sub>O. The organic layer was washed with saturated NaCl<sub>aq</sub>, dried over MgSO<sub>4</sub>, filtered, and concentrated under vacuum. The residue was chromatographed on silica gel with hexane/EtOAc = 50/1 to afford compound **1q-*d*<sub>3</sub>** as a colorless oil (1.51 g, 3.10 mmol; 92% yield).

<sup>1</sup>H NMR (CDCl<sub>3</sub>): δ 8.21 (d, <sup>3</sup>J<sub>HH</sub> = 8.2 Hz, 1H), 7.89 (d, <sup>3</sup>J<sub>HH</sub> = 9.2 Hz, 1H), 7.87 (dd, <sup>3</sup>J<sub>HH</sub> = 7.8 Hz and <sup>4</sup>J<sub>HH</sub> = 1.8 Hz, 1H), 7.61-7.50 (m, 2H), 7.40 (d, <sup>3</sup>J<sub>HH</sub> = 8.7 Hz, 1H), 1.98-1.86 (m, 2H), 1.83-1.49 (m, 6H), 1.46-1.00 (m, 14H). <sup>13</sup>C {<sup>1</sup>H} NMR (CDCl<sub>3</sub>): δ 154.2, 138.2, 132.5, 132.3, 129.2, 128.9, 127.2, 126.7, 126.4, 119.0, 118.8 (q, <sup>1</sup>J<sub>CF</sub> = 320 Hz), 29.0, 28.34, 28.32, 26.9, 26.6, -5.7--7.5 (m). HRMS (FAB) calcd for C<sub>24</sub>H<sub>29</sub>D<sub>3</sub>F<sub>3</sub>O<sub>3</sub>SSi (M+H<sup>+</sup>) 448.1976, found: 448.1986.

### 1-(*tert*-Butyl(methyl)(methyl-*d*<sub>3</sub>)silyl)-2-naphthyl trifluoromethanesulfonate (1s-*d*<sub>3</sub>)

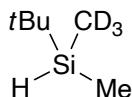

A mixture of Li turnings (279 mg, 40.2 mmol) and iodomethane-*d*<sub>3</sub> (636 μL, 10.0 mmol) in Et<sub>2</sub>O (10 mL) was cooled to 0 °C and sonicated for 4 h at 0 °C to give a 0.20 M solution of methyllithium-*d*<sub>3</sub> (determined by acid–base titration). The resulting mixture (except for unreacted Li) was then added dropwise over 10 min to a solution of *tert*-butylchloro(methyl)silane (600 mg, 4.39 mmol) in Et<sub>2</sub>O (3.0 mL) at -78 °C. The mixture was stirred for 30 min at -78 °C, warmed to room temperature, and further stirred for 1 h at room temperature. The mixture was passed through a pad of Celite with Et<sub>2</sub>O under nitrogen, and most of the solvent was removed by distillation under atmospheric pressure. The resulting mixture was vacuum-transferred to afford *tert*-butyl(methyl)(methyl-*d*<sub>3</sub>)silane as a colorless oil (1.89 g, 2.37 mmol; 54% yield, 15 wt% in Et<sub>2</sub>O).

<sup>1</sup>H NMR (CDCl<sub>3</sub>): δ 3.62 (q, <sup>3</sup>J<sub>HH</sub> = 3.8 Hz, 1H), 0.91 (s, 9H), 0.02 (d, <sup>3</sup>J<sub>HH</sub> = 3.7 Hz, 3H).

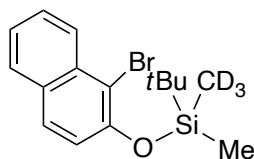

*tert*-Butyl(methyl)(methyl-*d*<sub>3</sub>)silane (1.89 g, 2.37 mmol; 15 wt% in Et<sub>2</sub>O) was added to a suspension of PdCl<sub>2</sub> (106 mg, 0.600 mmol) in CCl<sub>4</sub> (2.0 mL) at room temperature. The mixture was

stirred for 5 h at room temperature and passed through a pad of Celite with THF (3.0 mL) under nitrogen. 1-Bromo-2-naphthol (559 mg, 2.51 mmol) and imidazole (350 mg, 5.15 mmol) were added to it and the mixture was stirred for 4 h at 60 °C. The reaction was quenched with H<sub>2</sub>O at room temperature and this was extracted with Et<sub>2</sub>O. The organic layer was washed with saturated NaCl<sub>aq</sub>, dried over MgSO<sub>4</sub>, filtered, and concentrated under vacuum. The residue was chromatographed on silica gel with hexane to afford (1-bromo-2-naphthoxy)*tert*-butyl(methyl)(methyl-*d*<sub>3</sub>)silane as a colorless oil (494 mg, 1.52 mmol; 64% yield).

<sup>1</sup>H NMR (CDCl<sub>3</sub>): δ 8.21 (d, <sup>3</sup>J<sub>HH</sub> = 7.8 Hz, 1H), 7.77 (d, <sup>3</sup>J<sub>HH</sub> = 8.2 Hz, 1H), 7.69 (d, <sup>3</sup>J<sub>HH</sub> = 8.7 Hz, 1H), 7.55 (ddd, <sup>3</sup>J<sub>HH</sub> = 8.7 and 6.8 Hz and <sup>4</sup>J<sub>HH</sub> = 1.4 Hz, 1H), 7.39 (ddd, <sup>3</sup>J<sub>HH</sub> = 8.2 and 6.9 Hz and <sup>4</sup>J<sub>HH</sub> = 1.4 Hz, 1H), 7.12 (d, <sup>3</sup>J<sub>HH</sub> = 8.7 Hz, 1H), 1.09 (s, 9H), 0.29 (s, 3H).

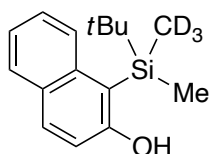

*n*BuLi (1.00 mL, 1.52 mmol; 1.52 M solution in hexane) was added dropwise over 5 min to a solution of (1-bromo-2-naphthoxy)*tert*-butyl(methyl)(methyl-*d*<sub>3</sub>)silane (494 mg, 1.52 mmol) in THF (4.0 mL) at -78 °C. The reaction mixture was stirred for 1 h at -78 °C and for 1 h at room temperature. The reaction was quenched with H<sub>2</sub>O and this was extracted with Et<sub>2</sub>O. The organic layer was washed with saturated NaCl<sub>aq</sub>, dried over MgSO<sub>4</sub>, filtered, and concentrated under vacuum. The residue was chromatographed on silica gel with hexane/EtOAc = 5/1 to afford 1-(*tert*-butyl(methyl)(methyl-*d*<sub>3</sub>)silyl)-2-naphthol as a red oil (427 mg, 1.38 mmol; 91% yield).

<sup>1</sup>H NMR (CDCl<sub>3</sub>): δ 8.03 (d, <sup>3</sup>J<sub>HH</sub> = 8.2 Hz, 1H), 7.75 (d, <sup>3</sup>J<sub>HH</sub> = 8.7 Hz, 1H), 7.74 (dd, <sup>3</sup>J<sub>HH</sub> = 8.3 Hz and <sup>4</sup>J<sub>HH</sub> = 1.4 Hz, 1H), 7.40 (ddd, <sup>3</sup>J<sub>HH</sub> = 8.7 and 6.9 Hz and <sup>4</sup>J<sub>HH</sub> = 1.4 Hz, 1H), 7.29 (ddd, <sup>3</sup>J<sub>HH</sub> = 7.8 and 6.9 Hz and <sup>4</sup>J<sub>HH</sub> = 1.4 Hz, 1H), 6.95 (d, <sup>3</sup>J<sub>HH</sub> = 8.7 Hz, 1H), 5.15 (s, 1H), 1.01 (s, 9H), 0.56 (s, 3H).

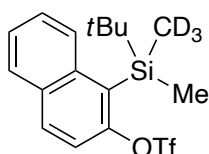

NaH (61.0 mg, 1.53 mmol; 60 wt% in mineral oil) was added to a solution of 1-(*tert*-butyl(methyl)(methyl-*d*<sub>3</sub>)silyl)-2-naphthol (427 mg, 1.38 mmol) in THF (6.0 mL) at 0 °C, and the reaction mixture was stirred for 20 min at 0 °C. *N*-Phenylbis(trifluoromethanesulfonimide) (546 mg, 1.53 mmol) was added to it, and the mixture was stirred for 5 min at 0 °C and for 1 h at room temperature. The reaction was quenched with H<sub>2</sub>O and this was extracted with Et<sub>2</sub>O. The organic layer was washed with saturated NaCl<sub>aq</sub>, dried over MgSO<sub>4</sub>, filtered, and concentrated under vacuum. The residue was chromatographed on silica gel with hexane to afford compound **1s-d<sub>3</sub>** as a white solid (510 mg, 1.30 mmol; 94% yield).

<sup>1</sup>H NMR (CDCl<sub>3</sub>): δ 8.26 (d, <sup>3</sup>J<sub>HH</sub> = 8.2 Hz, 1H), 7.94 (d, <sup>3</sup>J<sub>HH</sub> = 9.2 Hz, 1H), 7.91-7.85 (m, 1H),

7.61-7.50 (m, 3H), 1.07 (s, 9H), 0.64 (s, 3H).  $^{13}\text{C}\{^1\text{H}\}$  NMR ( $\text{CDCl}_3$ ):  $\delta$  155.1, 138.4, 133.0, 132.2, 130.2, 129.0, 126.6, 126.5, 126.2, 118.8 (q,  $^1J_{\text{CF}} = 320$  Hz), 117.8 (q,  $^5J_{\text{CF}} = 2.6$  Hz), 27.7, 19.1, 0.5. HRMS (FAB) calcd for  $\text{C}_{17}\text{H}_{19}\text{D}_3\text{F}_3\text{O}_3\text{SSi}$  ( $\text{M}+\text{H}^+$ ) 394.1194, found: 394.1197.

#### Analytical Data for Other Substrates:

##### 1-(Dicyclohexyl(3-methylbutyl)silyl)-2-naphthyl trifluoromethanesulfonate (1b)

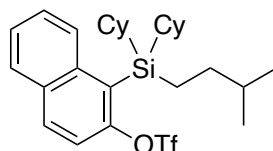

$^1\text{H}$  NMR ( $\text{CDCl}_3$ ):  $\delta$  8.30 (d,  $^3J_{\text{HH}} = 8.2$  Hz, 1H), 7.93 (d,  $^3J_{\text{HH}} = 8.7$  Hz, 1H), 7.88 (d,  $^3J_{\text{HH}} = 7.8$  Hz, 1H), 7.63-7.51 (m, 2H), 7.45 (d,  $^3J_{\text{HH}} = 9.2$  Hz, 1H), 2.07-1.93 (m, 2H), 1.89-1.15 (m, 25H), 0.96 (d,  $^3J_{\text{HH}} = 6.4$  Hz, 6H).  $^{13}\text{C}\{^1\text{H}\}$  NMR ( $\text{CDCl}_3$ ):  $\delta$  154.4, 138.8, 132.6, 132.2, 129.1, 129.0, 126.6, 126.4, 126.3, 118.83 (q,  $^5J_{\text{CF}} = 1.9$  Hz), 118.76 (q,  $^1J_{\text{CF}} = 320$  Hz), 33.5, 31.7, 29.2, 29.0, 28.6, 28.5, 27.1, 26.8, 22.2, 9.8.  $^{29}\text{Si}\{^1\text{H}\}$  NMR ( $\text{CDCl}_3$ ):  $\delta$  1.3. HRMS (DART) calcd for  $\text{C}_{28}\text{H}_{40}\text{F}_3\text{O}_3\text{SSi}$  ( $\text{M}+\text{H}^+$ ) 541.2414, found: 541.2408.

##### 1-(Dicyclohexyl(3-(4-fluorophenyl)propyl)silyl)-2-naphthyl trifluoromethanesulfonate (1d)

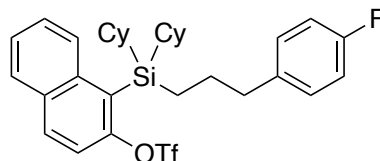

$^1\text{H}$  NMR ( $\text{CDCl}_3$ ):  $\delta$  8.20-8.13 (m, 1H), 7.90 (d,  $^3J_{\text{HH}} = 8.7$  Hz, 1H), 7.90-7.83 (m, 1H), 7.56-7.47 (m, 2H), 7.39 (d,  $^3J_{\text{HH}} = 8.7$  Hz, 1H), 7.12-7.03 (m, 2H), 6.98-6.90 (m, 2H), 2.64 (t,  $^3J_{\text{HH}} = 7.6$  Hz, 2H), 1.95-1.82 (m, 2H), 1.82-1.35 (m, 12H), 1.35-1.05 (m, 12H).  $^{13}\text{C}\{^1\text{H}\}$  NMR ( $\text{CDCl}_3$ ):  $\delta$  161.4 (d,  $^1J_{\text{CF}} = 243$  Hz), 154.4, 138.6, 138.2 (d,  $^4J_{\text{CF}} = 3.8$  Hz), 132.7, 132.2, 130.0 (d,  $^3J_{\text{CF}} = 7.7$  Hz), 129.1, 128.8, 126.7, 126.4, 126.0, 118.80 (q,  $^5J_{\text{CF}} = 1.9$  Hz), 118.77 (q,  $^1J_{\text{CF}} = 320$  Hz), 115.1 (d,  $^2J_{\text{CF}} = 21.1$  Hz), 39.4, 29.1, 28.9, 28.5, 28.4, 27.1, 27.0, 26.7, 11.8.  $^{29}\text{Si}\{^1\text{H}\}$  NMR ( $\text{CDCl}_3$ ):  $\delta$  0.8. HRMS (DART) calcd for  $\text{C}_{32}\text{H}_{39}\text{F}_4\text{O}_3\text{SSi}$  ( $\text{M}+\text{H}^+$ ) 607.2320, found: 607.2330.

##### 1-(Dicyclohexyl(3-(4-(phenylethynyl)phenyl)propyl)silyl)-2-naphthyl trifluoromethanesulfonate (1e)

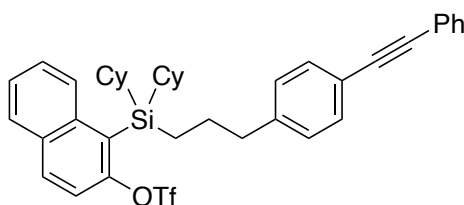

$^1\text{H}$  NMR ( $\text{CDCl}_3$ ):  $\delta$  8.17 (d,  $^3J_{\text{HH}} = 7.8$  Hz, 1H), 7.96-7.83 (m, 2H), 7.58-7.28 (m, 10H), 7.12 (d,

$^3J_{\text{HH}} = 7.8$  Hz, 2H), 2.69 (t,  $^3J_{\text{HH}} = 7.3$  Hz, 2H), 1.96-1.82 (m, 2H), 1.82-1.63 (m, 6H), 1.63-1.36 (m, 6H), 1.36-1.05 (m, 12H).  $^{13}\text{C}\{^1\text{H}\}$  NMR ( $\text{CDCl}_3$ ):  $\delta$  154.4, 143.0, 138.6, 138.2, 132.7, 132.2, 131.7, 129.1, 128.81, 128.77, 128.4, 128.2, 126.7, 126.4, 126.0, 123.6, 120.7, 118.8 (q,  $^5J_{\text{CF}} = 1.9$  Hz), 118.7 (q,  $^1J_{\text{CF}} = 320$  Hz), 89.7, 79.0, 40.2, 29.1, 28.9, 28.5, 28.4, 27.0, 26.7, 11.8.  $^{29}\text{Si}\{^1\text{H}\}$  NMR ( $\text{CDCl}_3$ ):  $\delta$  0.8. HRMS (DART) calcd for  $\text{C}_{40}\text{H}_{44}\text{F}_3\text{O}_3\text{SSi}$  ( $\text{M}+\text{H}^+$ ) 689.2727, found: 689.2727.

**1-((4-(*tert*-Butyldimethylsilyloxy)butyl)dicyclohexylsilyl)-2-naphthyl trifluoromethanesulfonate (1f)**

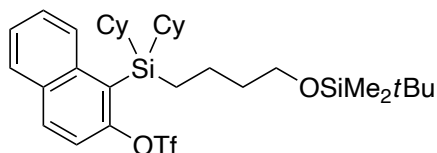

$^1\text{H}$  NMR ( $\text{CDCl}_3$ ):  $\delta$  8.25 (t,  $^3J_{\text{HH}} = 7.8$  Hz, 1H), 7.90 (d,  $^3J_{\text{HH}} = 9.2$  Hz, 1H), 7.87 (dd,  $^3J_{\text{HH}} = 7.3$  Hz and  $^4J_{\text{HH}} = 2.3$  Hz, 1H), 7.60-7.49 (m, 2H), 7.40 (d,  $^3J_{\text{HH}} = 9.2$  Hz, 1H), 3.62 (t,  $^3J_{\text{HH}} = 6.2$  Hz, 2H), 2.00-1.88 (m, 2H), 1.84-1.56 (m, 8H), 1.56-1.08 (m, 18H), 0.87 (s, 9H), 0.02 (s, 6H).  $^{13}\text{C}\{^1\text{H}\}$  NMR ( $\text{CDCl}_3$ ):  $\delta$  154.3, 138.7, 132.6, 132.2, 129.03, 128.95, 126.6, 126.4, 126.3, 118.8 (q,  $^5J_{\text{CF}} = 2.2$  Hz), 118.7 (q,  $^1J_{\text{CF}} = 320$  Hz), 62.8, 37.2, 29.2, 28.9, 28.54, 28.49, 27.0, 26.8, 26.1, 21.1, 18.4, 11.9, -5.2.  $^{29}\text{Si}\{^1\text{H}\}$  NMR ( $\text{CDCl}_3$ ):  $\delta$  18.3, 1.0. HRMS (DART) calcd for  $\text{C}_{33}\text{H}_{52}\text{F}_3\text{O}_4\text{SSi}_2$  ( $\text{M}+\text{H}^+$ ) 657.3071, found: 657.3079.

**1-((4-(9-Carbazolyl)butyl)dicyclohexylsilyl)-2-naphthyl trifluoromethanesulfonate (1g)**

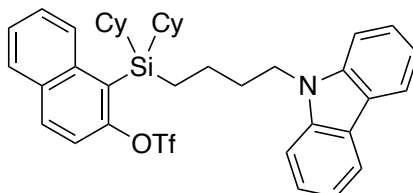

$^1\text{H}$  NMR ( $\text{CDCl}_3$ ):  $\delta$  8.13 (d,  $^3J_{\text{HH}} = 8.7$  Hz, 1H), 8.08 (d,  $^3J_{\text{HH}} = 7.3$  Hz, 2H), 7.90 (d,  $^3J_{\text{HH}} = 9.2$  Hz, 1H), 7.86 (dd,  $^3J_{\text{HH}} = 8.2$  Hz and  $^4J_{\text{HH}} = 1.8$  Hz, 1H), 7.53-7.32 (m, 7H), 7.19 (ddd,  $^3J_{\text{HH}} = 7.8$  and 6.9 Hz and  $^4J_{\text{HH}} = 0.9$  Hz, 2H), 4.28 (t,  $^3J_{\text{HH}} = 7.1$  Hz, 2H), 1.96 (quint,  $^3J_{\text{HH}} = 7.3$  Hz, 2H), 1.88-1.76 (m, 2H), 1.75-1.30 (m, 12H), 1.30-0.97 (m, 12H).  $^{13}\text{C}\{^1\text{H}\}$  NMR ( $\text{CDCl}_3$ ):  $\delta$  154.3, 140.5, 138.5, 132.7, 132.1, 129.0, 128.7, 126.6, 126.4, 126.0, 125.6, 123.0, 120.4, 118.8, 118.7 (q,  $^1J_{\text{CF}} = 320$  Hz), 108.8, 42.7, 33.1, 29.1, 28.8, 28.5, 28.4, 26.9, 26.7, 22.8, 11.9.  $^{29}\text{Si}\{^1\text{H}\}$  NMR ( $\text{CDCl}_3$ ):  $\delta$  0.9. HRMS (DART) calcd for  $\text{C}_{39}\text{H}_{45}\text{F}_3\text{NO}_3\text{SSi}$  ( $\text{M}+\text{H}^+$ ) 692.2836, found: 692.2843.

### 2-(Butyldicyclohexylsilyl)-3-methylphenyl trifluoromethanesulfonate (1i)

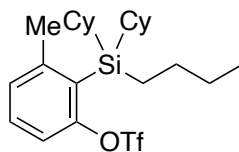

$^1\text{H}$  NMR ( $\text{CDCl}_3$ ):  $\delta$  7.29 (t,  $^3J_{\text{HH}} = 8.0$  Hz, 1H), 7.13 (d,  $^3J_{\text{HH}} = 8.3$  Hz, 2H), 2.50 (s, 3H), 1.91-1.62 (m, 8H), 1.58-1.47 (m, 2H), 1.46-1.13 (m, 16H), 1.10-0.99 (m, 2H), 0.91 (t,  $^3J_{\text{HH}} = 7.1$  Hz, 3H).  $^{13}\text{C}\{^1\text{H}\}$  NMR ( $\text{CDCl}_3$ ):  $\delta$  156.7, 147.7, 130.3, 130.2, 128.2, 118.7 (q,  $^1J_{\text{CF}} = 320$  Hz), 117.1 (q,  $^5J_{\text{CF}} = 2.2$  Hz), 29.0, 28.6, 28.5, 27.3, 27.2, 27.1, 26.4, 24.2, 13.9, 11.7.  $^{29}\text{Si}\{^1\text{H}\}$  NMR ( $\text{CDCl}_3$ ):  $\delta$  0.9. HRMS (DART) calcd for  $\text{C}_{24}\text{H}_{38}\text{F}_3\text{O}_3\text{SSi}$  ( $\text{M}+\text{H}^+$ ) 491.2258, found: 491.2272.

### 2-(Butyldicyclohexylsilyl)-3,5-dimethylphenyl trifluoromethanesulfonate (1j)

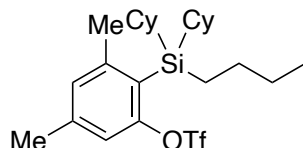

$^1\text{H}$  NMR ( $\text{CDCl}_3$ ):  $\delta$  6.98 (s, 1H), 6.96 (s, 1H), 2.47 (s, 3H), 2.33 (s, 3H), 1.93-1.63 (m, 8H), 1.62-1.48 (m, 2H), 1.48-1.13 (m, 16H), 1.11-0.99 (m, 2H), 0.93 (t,  $^3J_{\text{HH}} = 6.9$  Hz, 3H).  $^{13}\text{C}\{^1\text{H}\}$  NMR ( $\text{CDCl}_3$ ):  $\delta$  156.8, 147.3, 140.9, 131.3, 124.4, 118.7 (q,  $^1J_{\text{CF}} = 320$  Hz), 117.8 (q,  $^5J_{\text{CF}} = 2.2$  Hz), 29.1, 28.7, 28.6, 27.3, 27.24, 27.15, 26.4, 24.1, 21.1, 13.9, 11.7.  $^{29}\text{Si}\{^1\text{H}\}$  NMR ( $\text{CDCl}_3$ ):  $\delta$  0.6. HRMS (DART) calcd for  $\text{C}_{25}\text{H}_{40}\text{F}_3\text{O}_3\text{SSi}$  ( $\text{M}+\text{H}^+$ ) 505.2414, found: 505.2428.

### 2-(Butyldicyclohexylsilyl)-3-(2-methyl-1-propenyl)phenyl trifluoromethanesulfonate (1k)

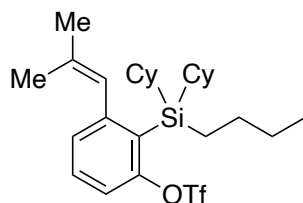

$^1\text{H}$  NMR ( $\text{CDCl}_3$ ):  $\delta$  7.34 (dd,  $^3J_{\text{HH}} = 8.3$  and 7.8 Hz, 1H), 7.17 (d,  $^3J_{\text{HH}} = 8.3$  Hz, 1H), 7.08 (d,  $^3J_{\text{HH}} = 7.8$  Hz, 1H), 6.39 (s, 1H), 1.91 (d,  $^4J_{\text{HH}} = 1.4$  Hz, 3H), 1.85-1.58 (m, 8H), 1.70 (d,  $^4J_{\text{HH}} = 0.9$  Hz, 3H), 1.56-1.43 (m, 2H), 1.43-1.07 (m, 16H), 1.05-0.95 (m, 2H), 0.89 (t,  $^3J_{\text{HH}} = 6.9$  Hz, 3H).  $^{13}\text{C}\{^1\text{H}\}$  NMR ( $\text{CDCl}_3$ ):  $\delta$  156.7, 148.6, 135.4, 130.3, 130.0, 128.1, 127.8, 118.7 (q,  $^1J_{\text{CF}} = 320$  Hz), 117.2 (q,  $^5J_{\text{CF}} = 2.2$  Hz), 29.00, 28.96, 28.7, 28.6, 27.4, 27.21, 27.16, 26.3, 26.2, 19.4, 14.0, 11.7.  $^{29}\text{Si}\{^1\text{H}\}$  NMR ( $\text{CDCl}_3$ ):  $\delta$  0.6. HRMS (DART) calcd for  $\text{C}_{27}\text{H}_{42}\text{F}_3\text{O}_3\text{SSi}$  ( $\text{M}+\text{H}^+$ ) 531.2571, found: 531.2578.

## 2-(Butyldicyclohexylsilyl)-3-(4-methoxyphenyl)phenyl trifluoromethanesulfonate (1l)

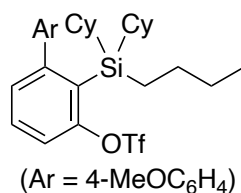

<sup>1</sup>H NMR (CDCl<sub>3</sub>): δ 7.38 (dd, <sup>3</sup>J<sub>HH</sub> = 8.2 and 7.3 Hz, 1H), 7.34 (dd, <sup>3</sup>J<sub>HH</sub> = 8.2 Hz and <sup>4</sup>J<sub>HH</sub> = 1.4 Hz, 1H), 7.21 (d, <sup>3</sup>J<sub>HH</sub> = 8.7 Hz, 2H), 7.16 (dd, <sup>3</sup>J<sub>HH</sub> = 7.3 Hz and <sup>4</sup>J<sub>HH</sub> = 1.4 Hz, 1H), 6.93 (d, <sup>3</sup>J<sub>HH</sub> = 8.3 Hz, 2H), 3.88 (s, 3H), 1.81-1.60 (m, 8H), 1.56-1.45 (m, 2H), 1.33-1.00 (m, 14H), 1.00-0.85 (m, 2H), 0.78 (t, <sup>3</sup>J<sub>HH</sub> = 6.9 Hz, 3H), 0.56-0.42 (m, 2H). <sup>13</sup>C{<sup>1</sup>H} NMR (CDCl<sub>3</sub>): δ 159.5, 157.0, 152.9, 136.3, 130.74, 130.67, 129.9, 127.7, 118.7 (q, <sup>1</sup>J<sub>CF</sub> = 320 Hz), 117.3 (q, <sup>5</sup>J<sub>CF</sub> = 2.2 Hz), 113.3, 55.6, 29.3, 29.2, 28.51, 28.49, 27.14, 27.10, 26.3, 13.8, 11.3. <sup>29</sup>Si{<sup>1</sup>H} NMR (CDCl<sub>3</sub>): δ 1.5. HRMS (DART) calcd for C<sub>30</sub>H<sub>42</sub>F<sub>3</sub>O<sub>4</sub>SSi (M+H<sup>+</sup>) 583.2520, found: 583.2545.

## 2-(Butyldicyclohexylsilyl)-3-(4-cyanophenyl)phenyl trifluoromethanesulfonate (1m)

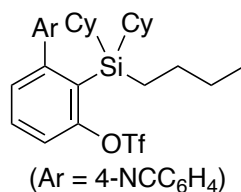

<sup>1</sup>H NMR (CDCl<sub>3</sub>): δ 7.70 (d, <sup>3</sup>J<sub>HH</sub> = 8.7 Hz, 2H), 7.48-7.39 (m, 4H), 7.09 (dd, <sup>3</sup>J<sub>HH</sub> = 6.9 Hz and <sup>4</sup>J<sub>HH</sub> = 1.4 Hz, 1H), 1.74-1.61 (m, 8H), 1.50-1.41 (m, 2H), 1.25-0.95 (m, 14H), 0.93-0.82 (m, 2H), 0.76 (t, <sup>3</sup>J<sub>HH</sub> = 6.9 Hz, 3H), 0.43-0.32 (m, 2H). <sup>13</sup>C{<sup>1</sup>H} NMR (CDCl<sub>3</sub>): δ 157.0, 150.6, 148.2, 131.7, 130.40, 130.38, 130.2, 127.7, 118.67 (q, <sup>1</sup>J<sub>CF</sub> = 320 Hz), 118.67, 118.5 (q, <sup>5</sup>J<sub>CF</sub> = 2.2 Hz), 111.8, 29.2, 29.1, 28.4, 27.1, 27.00, 26.95, 26.2, 13.7, 11.4. <sup>29</sup>Si{<sup>1</sup>H} NMR (CDCl<sub>3</sub>): δ 1.8. HRMS (FAB) calcd for C<sub>30</sub>H<sub>39</sub>F<sub>3</sub>NO<sub>3</sub>SSi (M+H<sup>+</sup>) 578.2367, found: 578.2373.

## 2-(Butyldicyclohexylsilyl)-3-(3-thienyl)phenyl trifluoromethanesulfonate (1n)

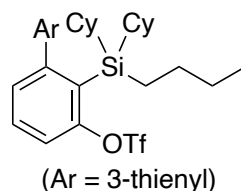

<sup>1</sup>H NMR (CDCl<sub>3</sub>): δ 7.41-7.31 (m, 3H), 7.19 (dd, <sup>3</sup>J<sub>HH</sub> = 7.3 Hz and <sup>4</sup>J<sub>HH</sub> = 1.4 Hz, 1H), 7.13 (dd, <sup>4</sup>J<sub>HH</sub> = 3.2 and 1.4 Hz, 1H), 7.06 (dd, <sup>3</sup>J<sub>HH</sub> = 5.0 Hz and <sup>4</sup>J<sub>HH</sub> = 1.4 Hz, 1H), 1.76-1.58 (m, 8H), 1.53-1.44 (m, 2H), 1.27-1.03 (m, 14H), 0.91-0.77 (m, 5H), 0.63-0.55 (m, 2H). <sup>13</sup>C{<sup>1</sup>H} NMR (CDCl<sub>3</sub>): δ 156.9, 147.4, 143.9, 130.6, 129.9, 129.7, 128.2, 125.0, 123.8, 118.7 (q, <sup>1</sup>J<sub>CF</sub> = 321 Hz), 118.0 (q, <sup>5</sup>J<sub>CF</sub> = 2.2 Hz), 29.3, 29.2, 28.5, 28.4, 27.3, 27.2, 27.1, 26.2, 13.9, 11.0. <sup>29</sup>Si{<sup>1</sup>H} NMR (CDCl<sub>3</sub>): δ 1.5.

HRMS (FAB) calcd for  $C_{27}H_{38}F_3O_3S_2Si$  ( $M+H^+$ ) 559.1978, found: 559.1979.

### 2-(Butyldicyclohexylsilyl)-3-methoxyphenyl trifluoromethanesulfonate (1o)

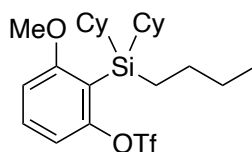

$^1H$  NMR ( $CDCl_3$ ):  $\delta$  7.37 (t,  $^3J_{HH} = 8.2$  Hz, 1H), 6.95 (d,  $^3J_{HH} = 8.2$  Hz, 1H), 6.81 (d,  $^3J_{HH} = 8.2$  Hz, 1H), 3.80 (s, 3H), 1.85-1.47 (m, 10H), 1.46-1.10 (m, 16H), 1.04-0.95 (m, 2H), 0.90 (t,  $^3J_{HH} = 6.9$  Hz, 3H).  $^{13}C\{^1H\}$  NMR ( $CDCl_3$ ):  $\delta$  165.9, 156.3, 131.7, 118.7 (q,  $^1J_{CF} = 320$  Hz), 117.4, 112.4 (q,  $^5J_{CF} = 1.9$  Hz), 109.0, 55.3, 28.8, 28.70, 28.67, 28.6, 27.3, 27.24, 27.16, 25.4, 14.0, 11.3.  $^{29}Si\{^1H\}$  NMR ( $CDCl_3$ ):  $\delta$  1.1. HRMS (FAB) calcd for  $C_{24}H_{38}F_3O_4SSi$  ( $M+H^+$ ) 507.2207, found: 507.2210.

### 4-(Butyldicyclohexylsilyl)-1-(phenylsulfonyl)-5-indolyl trifluoromethanesulfonate (1p)

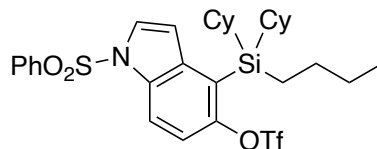

$^1H$  NMR ( $CDCl_3$ ):  $\delta$  8.04 (d,  $^3J_{HH} = 9.2$  Hz, 1H), 7.95-7.87 (m, 2H), 7.70 (d,  $^3J_{HH} = 4.1$  Hz, 1H), 7.63-7.56 (m, 1H), 7.50 (t,  $^3J_{HH} = 7.8$  Hz, 2H), 7.27 (d,  $^3J_{HH} = 9.2$  Hz, 1H), 6.85 (d,  $^3J_{HH} = 3.2$  Hz, 1H), 1.87-1.43 (m, 10H), 1.43-1.02 (m, 18H), 0.87 (t,  $^3J_{HH} = 6.9$  Hz, 3H).  $^{13}C\{^1H\}$  NMR ( $CDCl_3$ ):  $\delta$  152.4, 138.2, 137.0, 134.4, 132.7, 129.6, 127.9, 127.1, 122.6, 118.7 (q,  $^1J_{CF} = 320$  Hz), 116.5 (q,  $^5J_{CF} = 1.9$  Hz), 115.6, 110.9, 28.7, 28.41, 28.38, 27.2, 27.0, 26.8, 25.6, 13.8, 10.9.  $^{29}Si\{^1H\}$  NMR ( $CDCl_3$ ):  $\delta$  1.0. HRMS (DART) calcd for  $C_{31}H_{41}F_3NO_5S_2Si$  ( $M+H^+$ ) 656.2142, found: 656.2145.

### 1-(Dicyclohexyl(methyl)silyl)-2-naphthyl trifluoromethanesulfonate (1q)

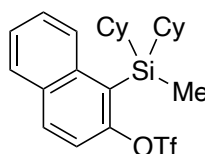

$^1H$  NMR ( $CDCl_3$ ):  $\delta$  8.22 (d,  $^3J_{HH} = 8.2$  Hz, 1H), 7.89 (d,  $^3J_{HH} = 9.2$  Hz, 1H), 7.87 (dd,  $^3J_{HH} = 7.3$  Hz and  $^3J_{HH} = 1.8$  Hz, 1H), 7.62-7.50 (m, 2H), 7.41 (d,  $^3J_{HH} = 9.2$  Hz, 1H), 2.01-1.87 (m, 2H), 1.85-1.49 (m, 6H), 1.48-1.00 (m, 14H), 0.57 (s, 3H).  $^{13}C\{^1H\}$  NMR ( $CDCl_3$ ):  $\delta$  154.2, 138.2, 132.5, 132.3, 129.2, 128.9, 127.3, 126.7, 126.4, 119.0 (q,  $^5J_{CF} = 1.9$  Hz), 118.8 (q,  $^1J_{CF} = 320$  Hz), 29.0, 28.3, 27.0, 26.6, -5.9.  $^{29}Si\{^1H\}$  NMR ( $CDCl_3$ ):  $\delta$  2.7. HRMS (DART) calcd for  $C_{24}H_{32}F_3O_3SSi$  ( $M+H^+$ ) 485.1788, found: 485.1797.



### 1-(Diisopropyl(methyl)silyl)-2-naphthyl trifluoromethanesulfonate (1r)

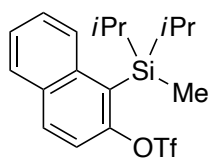

$^1\text{H}$  NMR ( $\text{CDCl}_3$ ):  $\delta$  8.29-8.21 (m, 1H), 7.96-7.85 (m, 2H), 7.61-7.51 (m, 2H), 7.46 (d,  $^3J_{\text{HH}} = 8.7$  Hz, 1H), 1.64 (sept,  $^3J_{\text{HH}} = 7.4$  Hz, 2H), 1.19 (d,  $^3J_{\text{HH}} = 7.4$  Hz, 6H), 0.87 (d,  $^3J_{\text{HH}} = 7.4$  Hz, 6H), 0.59 (s, 3H).  $^{13}\text{C}\{^1\text{H}\}$  NMR ( $\text{CDCl}_3$ ):  $\delta$  154.1, 138.1, 132.6, 132.3, 129.2, 128.9, 127.6, 126.7, 126.4, 119.0 (q,  $^5J_{\text{CF}} = 1.9$  Hz), 118.8 (q,  $^1J_{\text{CF}} = 320$  Hz), 18.9, 18.8, 14.5,  $-7.6$ .  $^{29}\text{Si}\{^1\text{H}\}$  NMR ( $\text{CDCl}_3$ ):  $\delta$  8.1. HRMS (DART) calcd for  $\text{C}_{18}\text{H}_{24}\text{F}_3\text{O}_3\text{SSi}$  ( $\text{M}+\text{H}^+$ ) 405.1162, found: 405.1167.

### 1-(*tert*-Butyldimethylsilyl)-2-naphthyl trifluoromethanesulfonate (1s)

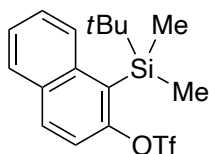

$^1\text{H}$  NMR ( $\text{CDCl}_3$ ):  $\delta$  8.26 (d,  $^3J_{\text{HH}} = 8.3$  Hz, 1H), 7.94 (d,  $^3J_{\text{HH}} = 9.2$  Hz, 1H), 7.88 (dd,  $^3J_{\text{HH}} = 7.3$  Hz and  $^4J_{\text{HH}} = 1.8$  Hz, 1H), 7.60-7.49 (m, 3H), 1.07 (s, 9H), 0.64 (s, 6H).  $^{13}\text{C}\{^1\text{H}\}$  NMR ( $\text{CDCl}_3$ ):  $\delta$  155.1, 138.4, 133.0, 132.2, 130.2, 129.0, 126.6, 126.5, 126.2, 118.8 (q,  $^1J_{\text{CF}} = 320$  Hz), 117.8 (q,  $^5J_{\text{CF}} = 2.4$  Hz), 27.7, 19.1, 0.6.  $^{29}\text{Si}\{^1\text{H}\}$  NMR ( $\text{CDCl}_3$ ):  $\delta$  4.7. HRMS (DART) calcd for  $\text{C}_{17}\text{H}_{22}\text{F}_3\text{O}_3\text{SSi}$  ( $\text{M}+\text{H}^+$ ) 391.1006, found: 391.1015.

### 2-(Dicyclohexyl(methyl)silyl)-3-methylphenyl trifluoromethanesulfonate (1u)

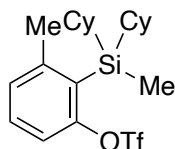

$^1\text{H}$  NMR ( $\text{CDCl}_3$ ):  $\delta$  7.28 (dd,  $^3J_{\text{HH}} = 8.2$  and  $7.8$  Hz, 1H), 7.19 (d,  $^3J_{\text{HH}} = 8.2$  Hz, 1H), 7.12 (d,  $^3J_{\text{HH}} = 7.3$  Hz, 1H), 2.49 (s, 3H), 1.93-1.60 (m, 8H), 1.46-1.02 (m, 14H), 0.45 (s, 3H).  $^{13}\text{C}\{^1\text{H}\}$  NMR ( $\text{CDCl}_3$ ):  $\delta$  156.6, 147.5, 130.4, 130.1, 128.7, 118.7 (q,  $^1J_{\text{CF}} = 320$  Hz), 116.9 (q,  $^5J_{\text{CF}} = 1.9$  Hz), 28.9, 28.5, 28.4, 28.3, 27.0, 25.7, 24.8,  $-5.7$ .  $^{29}\text{Si}\{^1\text{H}\}$  NMR ( $\text{CDCl}_3$ ):  $\delta$  2.8. HRMS (DART) calcd for  $\text{C}_{21}\text{H}_{32}\text{F}_3\text{O}_3\text{SSi}$  ( $\text{M}+\text{H}^+$ ) 449.1788, found: 449.1797.

### 2-(*tert*-Butyldimethylsilyl)-3-methylphenyl trifluoromethanesulfonate (1v)

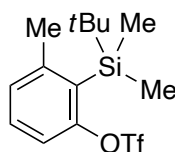

$^1\text{H}$  NMR ( $\text{CDCl}_3$ ):  $\delta$  7.31 (dd,  $^3J_{\text{HH}} = 8.2$  and  $6.9$  Hz, 1H), 7.28 (dd,  $^3J_{\text{HH}} = 8.7$  Hz and  $^4J_{\text{HH}} = 1.8$  Hz, 1H) 7.14 (d,  $^3J_{\text{HH}} = 6.4$  Hz, 1H), 2.51 (s, 3H), 0.98 (s, 9H), 0.48 (s, 6H).  $^{13}\text{C}\{^1\text{H}\}$  NMR ( $\text{CDCl}_3$ ):  $\delta$  157.3, 147.7, 130.7, 130.0, 127.7, 118.8 (q,  $^1J_{\text{CF}} = 321$  Hz), 115.8 (q,  $^5J_{\text{CF}} = 2.2$  Hz), 27.1, 25.5, 19.2, 0.1.  $^{29}\text{Si}\{^1\text{H}\}$  NMR ( $\text{CDCl}_3$ ):  $\delta$  4.9. HRMS (DART) calcd for  $\text{C}_{14}\text{H}_{22}\text{F}_3\text{O}_3\text{SSi}$  ( $\text{M}+\text{H}^+$ ) 355.1006, found: 355.1018.

### III. Catalytic Reactions and Derivatizations

#### General Procedure for Compounds 2a–2h in Scheme 2.

Et<sub>2</sub>NH (43.4 μL, 0.420 mmol) was added to a mixture of Pd(OAc)<sub>2</sub> (2.2 mg, 10 μmol), PCy<sub>3</sub>•HBF<sub>4</sub> (7.4 mg, 20 μmol), and compound **1** (0.200 mmol) in DMF (0.80 mL), and the resulting solution was stirred for 18 h at 80 °C. After cooled to room temperature, the reaction mixture was diluted with Et<sub>2</sub>O and H<sub>2</sub>O was added. This was extracted with Et<sub>2</sub>O, and the organic layer was washed with saturated NaCl<sub>aq</sub>, dried over MgSO<sub>4</sub>, filtered, and concentrated under vacuum. The residue was purified by silica gel preparative TLC to afford compound **2**.

#### General Procedure for Compounds 2i–2p in Scheme 2.

Et<sub>2</sub>NH (43.4 μL, 0.420 mmol) was added to a mixture of Pd(OAc)<sub>2</sub> (2.2 mg, 10 μmol), PCy<sub>3</sub>•HBF<sub>4</sub> (7.4 mg, 20 μmol), and compound **1** (0.200 mmol) in DMF (4.0 mL), and the resulting solution was stirred for 18 h at 100 °C. After cooled to room temperature, the reaction mixture was diluted with Et<sub>2</sub>O and H<sub>2</sub>O was added. This was extracted with Et<sub>2</sub>O, and the organic layer was washed with saturated NaCl<sub>aq</sub>, dried over MgSO<sub>4</sub>, filtered, and concentrated under vacuum. The residue was purified by silica gel preparative TLC to afford compound **2**.

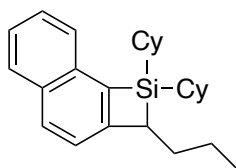

**Compound 2a.** The reaction was conducted on 0.150 mmol scale. Hexane was used for the preparative TLC. Colorless oil. (45.1 mg, 0.113 mmol; 75% yield, containing ca. 3% impurity). The reaction could be scaled up using 3.05 mmol of **1a** to give **2a** in 75% yield (883 mg, 2.30 mmol; containing ca. 6% impurity).

<sup>1</sup>H NMR (CDCl<sub>3</sub>): δ 7.83-7.77 (m, 2H), 7.68 (d, <sup>3</sup>J<sub>HH</sub> = 8.2 Hz, 1H), 7.47 (ddd, <sup>3</sup>J<sub>HH</sub> = 7.8 and 6.9 Hz and <sup>4</sup>J<sub>HH</sub> = 1.4 Hz, 1H), 7.41 (ddd, <sup>3</sup>J<sub>HH</sub> = 7.8 and 6.9 Hz and <sup>4</sup>J<sub>HH</sub> = 1.8 Hz, 1H), 7.31 (d, <sup>3</sup>J<sub>HH</sub> = 8.7 Hz, 1H), 2.61 (dd, <sup>3</sup>J<sub>HH</sub> = 10.1 and 6.4 Hz, 1H), 2.02-1.62 (m, 12H), 1.62-1.12 (m, 14H), 1.01 (d, <sup>3</sup>J<sub>HH</sub> = 7.3 Hz, 3H). <sup>13</sup>C{<sup>1</sup>H} NMR (CDCl<sub>3</sub>): δ 156.0, 140.8, 135.3, 132.6, 131.0, 129.1, 128.5, 126.5, 125.0, 123.7, 33.7, 31.3, 29.1, 28.9, 28.8, 28.4, 28.3, 28.2, 28.1, 27.0, 26.9, 25.0, 24.8, 24.5, 14.5. <sup>29</sup>Si{<sup>1</sup>H} NMR (CDCl<sub>3</sub>): δ 14.6. IR (neat) 3042, 2919, 2845, 1502, 1445, 1099, 996, 845, 815, 747 cm<sup>-1</sup>. HRMS (EI) calcd for C<sub>26</sub>H<sub>36</sub>Si (M<sup>+</sup>) 376.2581, found: 376.2586.

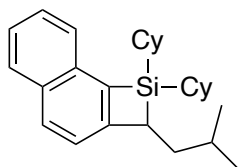

**Compound 2b.** Hexane was used for the preparative TLC. White solid. (60.5 mg, 0.155 mmol; 78% yield, containing ca. 1% impurity).

$^1\text{H}$  NMR ( $\text{CDCl}_3$ ):  $\delta$  7.85-7.80 (m, 2H), 7.72 (d,  $^3J_{\text{HH}} = 7.8$  Hz, 1H), 7.50 (ddd,  $^3J_{\text{HH}} = 8.3$  and 6.8 Hz and  $^4J_{\text{HH}} = 1.4$  Hz, 1H), 7.43 (ddd,  $^3J_{\text{HH}} = 7.8$  and 6.9 Hz and  $^4J_{\text{HH}} = 1.4$  Hz, 1H), 7.33 (d,  $^3J_{\text{HH}} = 8.2$  Hz, 1H), 2.73 (dd,  $^3J_{\text{HH}} = 10.1$  and 6.9 Hz, 1H), 2.00-1.63 (m, 13H), 1.55-1.13 (m, 12H), 1.05 (d,  $^3J_{\text{HH}} = 6.0$  Hz, 6H).  $^{13}\text{C}\{^1\text{H}\}$  NMR ( $\text{CDCl}_3$ ):  $\delta$  156.1, 140.7, 135.3, 132.6, 131.1, 129.1, 128.5, 126.5, 125.0, 123.6, 40.7, 29.6, 29.3, 29.1, 28.9, 28.8, 28.42, 28.39, 28.3, 28.2, 28.1, 27.0, 26.9, 25.0, 24.5, 23.3, 22.8.  $^{29}\text{Si}\{^1\text{H}\}$  NMR ( $\text{CDCl}_3$ ):  $\delta$  14.7. IR (KBr) 3044, 2953, 2919, 2844, 1506, 1443, 996, 888, 810, 748  $\text{cm}^{-1}$ . HRMS (FAB) calcd for  $\text{C}_{27}\text{H}_{39}\text{Si}$  ( $\text{M}+\text{H}^+$ ) 391.2816, found: 391.2810.

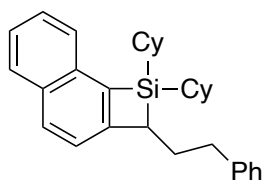

**Compound 2c.** Hexane/EtOAc = 100/1  $\rightarrow$  hexane was used for the preparative TLC. Colorless oil (69.6 mg, 0.159 mmol; 79% yield, containing ca. 4% impurity).

$^1\text{H}$  NMR ( $\text{CDCl}_3$ ):  $\delta$  7.86 (d,  $^3J_{\text{HH}} = 8.2$  Hz, 2H), 7.76 (d,  $^3J_{\text{HH}} = 7.8$  Hz, 1H), 7.53 (t,  $^3J_{\text{HH}} = 7.6$  Hz, 1H), 7.47 (t,  $^3J_{\text{HH}} = 7.3$  Hz, 1H), 7.42-7.33 (m, 3H), 7.31 (d,  $^3J_{\text{HH}} = 7.4$  Hz, 2H), 7.25 (t,  $^3J_{\text{HH}} = 7.1$  Hz, 1H), 2.98-2.81 (m, 2H), 2.74 (dd,  $^3J_{\text{HH}} = 9.6$  and 6.0 Hz, 1H), 2.46-2.32 (m, 1H), 2.21-2.06 (m, 1H), 2.06-1.67 (m, 10H), 1.64-1.10 (m, 12H).  $^{13}\text{C}\{^1\text{H}\}$  NMR ( $\text{CDCl}_3$ ):  $\delta$  155.5, 142.9, 140.7, 135.3, 132.7, 131.2, 129.1, 128.6, 128.52, 128.49, 126.5, 125.9, 125.1, 123.5, 38.1, 33.7, 31.4, 29.2, 28.94, 28.92, 28.39, 28.37, 28.3, 28.2, 28.1, 27.0, 26.9, 25.0, 24.5.  $^{29}\text{Si}\{^1\text{H}\}$  NMR ( $\text{CDCl}_3$ ):  $\delta$  14.6. IR (neat) 3026, 2919, 2845, 1496, 1445, 1096, 887, 817, 745, 698  $\text{cm}^{-1}$ . HRMS (EI) calcd for  $\text{C}_{31}\text{H}_{38}\text{Si}$  ( $\text{M}^+$ ) 438.2737, found: 438.2743.

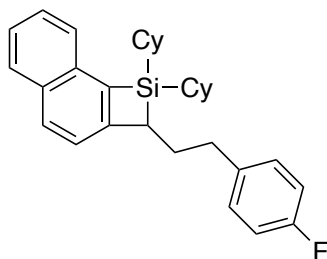

**Compound 2d.** Hexane/EtOAc = 50/1 was used for the preparative TLC. Colorless oil (72.1 mg, 0.158 mmol; 79% yield, containing ca. 4% impurity).

$^1\text{H}$  NMR ( $\text{CDCl}_3$ ):  $\delta$  7.88 (d,  $^3J_{\text{HH}} = 8.2$  Hz, 2H), 7.78 (d,  $^3J_{\text{HH}} = 8.3$  Hz, 1H), 7.55 (t,  $^3J_{\text{HH}} = 7.6$

Hz, 1H), 7.49 (t,  $^3J_{\text{HH}} = 7.3$  Hz, 1H), 7.39 (dd,  $^3J_{\text{HH}} = 8.2$  Hz and  $^4J_{\text{HH}} = 2.3$  Hz, 1H), 7.31-7.22 (m, 2H), 7.06 (td,  $^3J = 8.7$  Hz and  $^4J_{\text{HH}} = 2.3$  Hz, 2H), 2.96-2.79 (m, 2H), 2.79-2.69 (m, 1H), 2.44-2.30 (m, 1H), 2.18-2.04 (m, 1H), 2.05-1.67 (m, 10H), 1.65-1.17 (m, 12H).  $^{13}\text{C}\{^1\text{H}\}$  NMR ( $\text{CDCl}_3$ ):  $\delta$  161.4 (d,  $^1J_{\text{CF}} = 243$  Hz), 155.3, 140.7, 138.5 (d,  $^4J_{\text{CF}} = 2.9$  Hz), 135.3, 132.7, 131.2, 129.8 (d,  $^3J_{\text{CF}} = 7.7$  Hz), 129.1, 128.5, 126.6, 125.2, 123.5, 115.2 (d,  $^2J_{\text{CF}} = 21.1$  Hz), 37.2, 33.8, 31.2, 29.2, 28.91, 28.89, 28.34, 28.29, 28.1, 28.0, 27.0, 26.8, 25.0, 24.4.  $^{29}\text{Si}\{^1\text{H}\}$  NMR ( $\text{CDCl}_3$ ):  $\delta$  14.6. IR (neat) 3041, 2919, 2845, 1508, 1445, 1221, 1098, 846, 819, 747  $\text{cm}^{-1}$ . HRMS (FAB) calcd for  $\text{C}_{31}\text{H}_{38}\text{FSi}$  ( $\text{M}+\text{H}^+$ ) 457.2721, found: 457.2716.

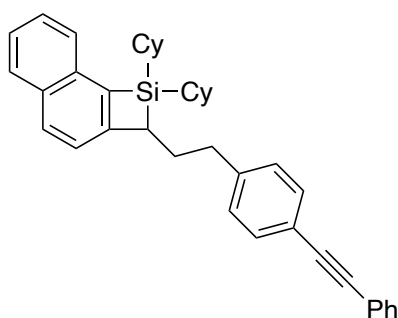

**Compound 2e.** Hexane/EtOAc = 15/1→50/1 was used for the preparative TLC. White amorphous (60.7 mg, 0.113 mmol; 56% yield).

$^1\text{H}$  NMR ( $\text{CDCl}_3$ ):  $\delta$  7.82 (d,  $^3J_{\text{HH}} = 8.2$  Hz, 2H), 7.70 (d,  $^3J_{\text{HH}} = 7.3$  Hz, 1H), 7.56-7.45 (m, 5H), 7.42 (ddd,  $^3J_{\text{HH}} = 7.8$  and 6.9 Hz and  $^4J_{\text{HH}} = 1.4$  Hz, 1H), 7.38-7.28 (m, 4H), 7.23 (d,  $^3J_{\text{HH}} = 8.2$  Hz, 2H), 2.92-2.75 (m, 2H), 2.67 (dd,  $^3J_{\text{HH}} = 10.1$  and 6.4 Hz, 1H), 2.38-2.25 (m, 1H), 2.12-1.99 (m, 1H), 1.97-1.61 (m, 10H), 1.53-1.37 (m, 2H), 1.37-1.11 (m, 10H).  $^{13}\text{C}\{^1\text{H}\}$  NMR ( $\text{CDCl}_3$ ):  $\delta$  155.3, 143.4, 140.7, 135.3, 132.7, 131.8, 131.7, 131.2, 129.1, 128.6, 128.5, 128.2, 126.6, 125.2, 123.6, 123.5, 120.8, 89.7, 89.0, 38.0, 33.5, 31.2, 29.2, 28.91, 28.89, 28.4, 28.3, 28.1, 28.0, 27.0, 26.8, 25.0, 24.4.  $^{29}\text{Si}\{^1\text{H}\}$  NMR ( $\text{CDCl}_3$ ):  $\delta$  14.5. IR (KBr) 3041, 2918, 2845, 1510, 1444, 996, 816, 753, 689, 510  $\text{cm}^{-1}$ . HRMS (FAB) calcd for  $\text{C}_{39}\text{H}_{43}\text{Si}$  ( $\text{M}+\text{H}^+$ ) 539.3129, found: 539.3141.

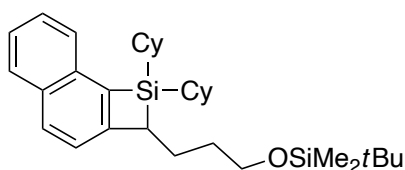

**Compound 2f.** Hexane/EtOAc = 30/1→50/1 was used for the preparative TLC. Colorless oil (81.2 mg, 0.160 mmol; 80% yield, containing ca. 3% impurity).

$^1\text{H}$  NMR ( $\text{CDCl}_3$ ):  $\delta$  7.82 (d,  $^3J_{\text{HH}} = 8.2$  Hz, 2H), 7.70 (d,  $^3J_{\text{HH}} = 7.3$  Hz, 1H), 7.48 (ddd,  $^3J_{\text{HH}} = 7.8$  and 6.9 Hz and  $^4J_{\text{HH}} = 1.4$  Hz, 1H), 7.42 (ddd,  $^3J_{\text{HH}} = 8.2$  and 6.9 Hz and  $^4J_{\text{HH}} = 1.4$  Hz, 1H), 7.33 (d,  $^3J_{\text{HH}} = 8.7$  Hz, 1H), 3.82-3.64 (m, 2H), 2.68-2.56 (m, 1H), 2.08-1.61 (m, 14H), 1.55-1.11 (m, 12H), 0.93 (s, 9H), 0.09 (s, 6H).  $^{13}\text{C}\{^1\text{H}\}$  NMR ( $\text{CDCl}_3$ ):  $\delta$  155.8, 140.7, 135.3, 132.6, 131.1, 129.1, 128.5, 126.5, 125.1, 123.6, 63.6, 34.9, 31.2, 29.0, 28.9, 28.8, 28.4, 28.34, 28.29, 28.2, 28.1, 27.7, 27.0, 26.9,

26.2, 24.9, 24.4, -5.06, -5.08.  $^{29}\text{Si}\{^1\text{H}\}$  NMR ( $\text{CDCl}_3$ ):  $\delta$  18.5, 14.6. IR (neat) 3042, 2922, 2848, 1445, 1256, 1099, 1018, 836, 815, 777  $\text{cm}^{-1}$ . HRMS (FAB) calcd for  $\text{C}_{32}\text{H}_{51}\text{OSi}_2$  ( $\text{M}+\text{H}^+$ ) 507.3473, found: 507.3480.

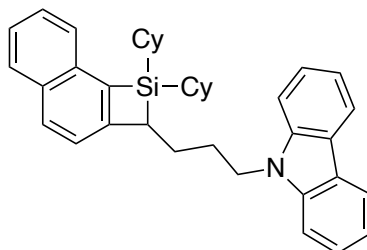

**Compound 2g.** Hexane/EtOAc = 30/1 was used for the preparative TLC. White amorphous (76.4 mg, 0.141 mmol; 70% yield, containing ca. 2% impurity).

$^1\text{H}$  NMR ( $\text{CDCl}_3$ ):  $\delta$  8.14 (d,  $^3J_{\text{HH}} = 7.8$  Hz, 2H), 7.85-7.78 (m, 2H), 7.69 (d,  $^3J_{\text{HH}} = 7.8$  Hz, 1H), 7.56-7.40 (m, 6H), 7.33-7.22 (m, 3H), 4.55-4.34 (m, 2H), 2.63 (dd,  $^3J_{\text{HH}} = 9.6$  and 5.0 Hz, 1H), 2.25-2.01 (m, 3H), 1.95-1.57 (m, 11H), 1.45-1.02 (m, 12H).  $^{13}\text{C}\{^1\text{H}\}$  NMR ( $\text{CDCl}_3$ ):  $\delta$  155.0, 140.7, 140.6, 135.2, 132.6, 131.2, 129.1, 128.4, 126.6, 125.8, 125.2, 123.5, 123.0, 120.5, 118.9, 108.7, 43.3, 31.04, 31.02, 29.3, 29.0, 28.8, 28.4, 28.2, 28.14, 28.08, 28.0, 26.9, 26.8, 24.9, 24.3.  $^{29}\text{Si}\{^1\text{H}\}$  NMR ( $\text{CDCl}_3$ ):  $\delta$  14.5. IR (KBr) 3045, 2920, 2845, 1597, 1484, 1463, 1451, 1347, 1326, 1243, 1151, 816, 749, 722  $\text{cm}^{-1}$ . HRMS (FAB) calcd for  $\text{C}_{38}\text{H}_{43}\text{NSi}$  ( $\text{M}^+$ ) 541.3159, found: 541.3168.

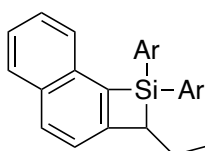

(Ar = 2-MeOCH<sub>2</sub>O-1-naphthyl)

**Compound 2h.** Hexane/EtOAc = 10/1 and then hexane/EtOAc = 50/1 were used for the preparative TLC. White amorphous (81.9 mg, 0.143 mmol; 72% yield).

$^1\text{H}$  NMR ( $\text{CDCl}_3$ ):  $\delta$  8.88 (d,  $^3J_{\text{HH}} = 8.2$  Hz, 1H), 8.69 (d,  $^3J_{\text{HH}} = 8.7$  Hz, 1H), 8.58 (d,  $^3J_{\text{HH}} = 8.2$  Hz, 1H), 7.89 (d,  $^3J_{\text{HH}} = 8.2$  Hz, 1H), 7.87 (d,  $^3J_{\text{HH}} = 7.8$  Hz, 1H), 7.81 (d,  $^3J_{\text{HH}} = 9.2$  Hz, 1H), 7.79-7.72 (m, 3H), 7.56 (t,  $^3J_{\text{HH}} = 7.8$  Hz, 2H), 7.53-7.42 (m, 2H), 7.40-7.31 (m, 3H), 7.27 (dd,  $^3J_{\text{HH}} = 8.2$  and 6.9 Hz, 1H), 7.17 (ddd,  $^3J_{\text{HH}} = 8.7$  and 6.9 Hz and  $^4J_{\text{HH}} = 1.4$  Hz, 1H), 4.91 (d,  $^2J_{\text{HH}} = 6.9$  Hz, 2H), 4.64 (d,  $^2J_{\text{HH}} = 6.9$  Hz, 2H), 3.67 (t,  $^3J_{\text{HH}} = 7.3$  Hz, 1H), 2.85 (s, 3H), 2.59 (s, 3H), 2.06-1.92 (m, 1H), 1.87-1.72 (m, 1H), 1.17 (t,  $^3J_{\text{HH}} = 7.6$  Hz, 3H).  $^{13}\text{C}\{^1\text{H}\}$  NMR ( $\text{CDCl}_3$ ):  $\delta$  160.2, 159.8, 155.9, 142.0, 138.5, 137.9, 135.2, 133.5, 132.1, 131.94, 131.85, 130.3, 129.8, 129.4, 128.7, 128.44, 128.40, 128.3, 126.43, 126.37, 126.1, 125.1, 124.3, 123.7, 123.6, 122.2, 120.7, 115.8, 114.4, 95.0, 94.1, 55.6, 55.2, 39.6, 25.8, 14.8.  $^{29}\text{Si}\{^1\text{H}\}$  NMR ( $\text{CDCl}_3$ ):  $\delta$  14.5. IR (KBr) 3047, 2956, 2928, 1587, 1505, 1458, 1428, 1322, 1236, 1194, 1148, 1078, 1033, 1013, 987, 921, 888, 822, 777, 748  $\text{cm}^{-1}$ . HRMS (FAB) calcd for  $\text{C}_{37}\text{H}_{35}\text{O}_4\text{Si}$  ( $\text{M}+\text{H}^+$ ) 571.2299, found: 571.2303.

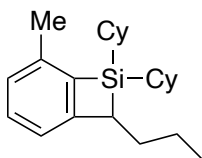

**Compound 2i.** Hexane was used for the preparative TLC. Colorless oil (49.0 mg, 0.144 mmol; 72% yield, containing ca. 7% impurity). The reaction could be scaled up using 3.18 mmol of **1h** to give **2h** in 79% yield (918 mg, 2.52 mmol; containing ca. 6% impurity).

$^1\text{H}$  NMR ( $\text{CDCl}_3$ ):  $\delta$  7.23 (t,  $^3J_{\text{HH}} = 7.6$  Hz, 1H), 7.01 (d,  $^3J_{\text{HH}} = 6.9$  Hz, 1H), 7.00 (d,  $^3J_{\text{HH}} = 7.8$  Hz, 1H), 2.50 (dd,  $^3J_{\text{HH}} = 9.6$  and 6.9 Hz, 1H), 2.31 (s, 3H), 1.94-1.61 (m, 12H), 1.61-1.10 (m, 14H), 0.99 (t,  $^3J_{\text{HH}} = 7.3$  Hz, 3H).  $^{13}\text{C}\{^1\text{H}\}$  NMR ( $\text{CDCl}_3$ ):  $\delta$  157.1, 142.4, 141.1, 130.6, 126.8, 121.8, 33.7, 31.2, 29.1, 28.9, 28.8, 28.38, 28.35, 28.3, 28.2, 28.1, 27.0, 26.9, 24.8, 24.7, 24.4, 22.8, 14.5.  $^{29}\text{Si}\{^1\text{H}\}$  NMR ( $\text{CDCl}_3$ ):  $\delta$  15.2. IR (neat) 3046, 2919, 2846, 1575, 1460, 1445, 1095, 888, 781, 758  $\text{cm}^{-1}$ . HRMS (EI) calcd for  $\text{C}_{23}\text{H}_{36}\text{Si}$  ( $\text{M}^+$ ) 340.2581, found: 340.2583.

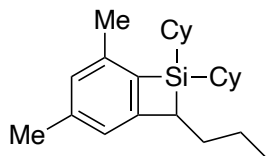

**Compound 2j.** Hexane was used for the preparative TLC. Colorless oil (55.5 mg, 0.157 mmol; 78% yield, containing ca. 7% impurity).

$^1\text{H}$  NMR ( $\text{CDCl}_3$ ):  $\delta$  6.86 (s, 1H), 6.84 (s, 1H), 2.46 (dd,  $^3J_{\text{HH}} = 9.6$  and 6.9 Hz, 1H), 2.31 (s, 3H), 2.28 (s, 3H), 1.93-1.59 (m, 12H), 1.59-1.05 (m, 14H), 0.98 (t,  $^3J_{\text{HH}} = 7.3$  Hz, 3H).  $^{13}\text{C}\{^1\text{H}\}$  NMR ( $\text{CDCl}_3$ ):  $\delta$  157.2, 141.0, 140.6, 138.6, 128.2, 122.6, 33.7, 30.9, 29.1, 28.9, 28.8, 28.40, 28.38, 28.3, 28.2, 28.1, 27.1, 27.0, 24.9, 24.8, 24.4, 22.7, 22.1, 14.5.  $^{29}\text{Si}\{^1\text{H}\}$  NMR ( $\text{CDCl}_3$ ):  $\delta$  14.3. IR (neat) 2919, 2846, 1591, 1445, 1097, 995, 888, 846, 815, 732, 608  $\text{cm}^{-1}$ . HRMS (FAB) calcd for  $\text{C}_{24}\text{H}_{39}\text{Si}$  ( $\text{M}+\text{H}^+$ ) 355.2816, found: 355.2819.

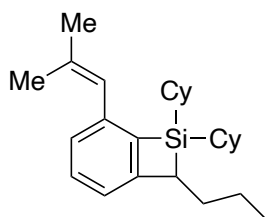

**Compound 2k.** Hexane was used for the preparative TLC. Colorless oil (58.6 mg, 0.154 mmol; 77% yield, containing ca. 7% impurity).

$^1\text{H}$  NMR ( $\text{CDCl}_3$ ):  $\delta$  7.29 (t,  $^3J_{\text{HH}} = 7.6$  Hz, 1H), 7.15 (d,  $^3J_{\text{HH}} = 7.3$  Hz, 1H), 7.01 (d,  $^3J_{\text{HH}} = 7.3$  Hz, 1H), 6.17 (s, 1H), 2.52 (dd,  $^3J_{\text{HH}} = 9.6$  and 6.9 Hz, 1H), 1.97-1.60 (m, 12H), 1.90 (d,  $^4J_{\text{HH}} = 0.9$  Hz, 3H), 1.85 (d,  $^4J_{\text{HH}} = 0.9$  Hz, 3H), 1.60-1.12 (m, 14H), 1.00 (t,  $^3J_{\text{HH}} = 7.1$  Hz, 3H).  $^{13}\text{C}\{^1\text{H}\}$  NMR ( $\text{CDCl}_3$ ):  $\delta$  156.9, 143.0, 141.8, 134.8, 130.1, 126.8, 126.0, 122.2, 33.7, 31.3, 28.9, 28.8, 28.6, 28.4,

28.29, 28.26, 28.2, 28.1, 27.07, 27.06, 27.0, 24.8, 24.7, 24.3, 19.6, 14.5.  $^{29}\text{Si}\{^1\text{H}\}$  NMR ( $\text{CDCl}_3$ ):  $\delta$  14.8. IR (neat) 3048, 2919, 2846, 1562, 1458, 1445, 1097, 888, 844, 741  $\text{cm}^{-1}$ . HRMS (FAB) calcd for  $\text{C}_{26}\text{H}_{41}\text{Si}$  ( $\text{M}+\text{H}^+$ ) 381.2972, found: 381.2981.

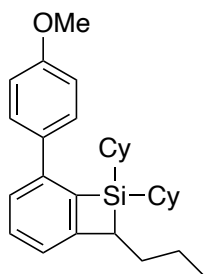

**Compound 2l.** Hexane/EtOAc = 20/1 was used for the preparative TLC. Yellow oil (78.5 mg, 0.181 mmol; 91% yield, containing ca. 9% impurity).

$^1\text{H}$  NMR ( $\text{CDCl}_3$ ):  $\delta$  7.50 (d,  $^3J_{\text{HH}} = 8.7$  Hz, 2H), 7.43-7.35 (m, 2H), 7.14-7.09 (m, 1H), 6.96 (d,  $^3J_{\text{HH}} = 8.7$  Hz, 2H), 3.87 (s, 3H), 2.59 (dd,  $^3J_{\text{HH}} = 10.1$  and 6.9 Hz, 1H), 2.02-1.43 (m, 14H), 1.40-1.05 (m, 12H), 1.02 (t,  $^3J_{\text{HH}} = 7.3$  Hz, 3H).  $^{13}\text{C}\{^1\text{H}\}$  NMR ( $\text{CDCl}_3$ ):  $\delta$  159.1, 157.4, 143.5, 139.9, 134.7, 131.0, 128.2, 124.2, 122.8, 114.0, 55.4, 33.6, 31.0, 28.9, 28.8, 28.5, 28.2, 28.14, 28.08, 28.02, 28.00, 27.0, 26.9, 24.9, 24.82, 24.80, 14.5.  $^{29}\text{Si}\{^1\text{H}\}$  NMR ( $\text{CDCl}_3$ ):  $\delta$  14.9. IR (neat) 3047, 2998, 2920, 2846, 1609, 1515, 1456, 1248, 1178, 1037, 785, 833  $\text{cm}^{-1}$ . HRMS (FAB) calcd for  $\text{C}_{29}\text{H}_{40}\text{OSi}$  ( $\text{M}^+$ ) 432.2843, found: 432.2854.

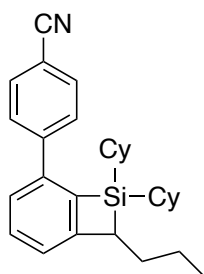

**Compound 2m.** The purification was performed by column chromatography on silica gel with hexane/EtOAc = 20/1 and by GPC with  $\text{CHCl}_3$ . Yellow oil (62.9 mg, 0.147 mmol; 74% yield, containing ca. 9% impurity).

$^1\text{H}$  NMR ( $\text{CDCl}_3$ )  $\delta$  7.71 (d,  $^3J_{\text{HH}} = 8.2$  Hz, 2H), 7.62 (d,  $^3J_{\text{HH}} = 8.2$  Hz, 2H), 7.44-7.40 (m, 2H), 7.24-7.18 (m, 1H), 2.61 (dd,  $^3J_{\text{HH}} = 10.1$  and 6.9 Hz, 1H), 2.00-1.87 (m, 1H), 1.85-1.40 (m, 13H), 1.36-1.03 (m, 12H), 1.01 (t,  $^3J_{\text{HH}} = 7.3$  Hz, 3H).  $^{13}\text{C}\{^1\text{H}\}$  NMR ( $\text{CDCl}_3$ ):  $\delta$  157.7, 146.8, 141.8, 141.3, 132.5, 131.2, 127.7, 125.1, 124.7, 119.2, 110.7, 33.5, 31.1, 28.9, 28.8, 28.3, 28.03, 27.96, 27.9, 26.9, 26.8, 24.8, 24.74, 24.71, 14.5.  $^{29}\text{Si}\{^1\text{H}\}$  NMR ( $\text{CDCl}_3$ ):  $\delta$  15.2. IR (neat) 2920, 2846, 1606, 1445, 909, 844, 792, 546, 507  $\text{cm}^{-1}$ . HRMS (FAB) calcd for  $\text{C}_{29}\text{H}_{38}\text{NSi}$  ( $\text{M}+\text{H}^+$ ) 428.2768, found: 428.2770.



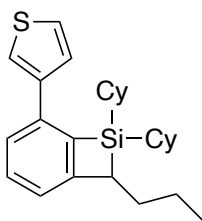

**Compound 2n.** The purification was performed by column chromatography on silica gel with hexane and by GPC with  $\text{CHCl}_3$ . Colorless oil (54.2 mg, 0.133 mmol; 67% yield, containing ca. 6% impurity).

$^1\text{H}$  NMR ( $\text{CDCl}_3$ ):  $\delta$  7.44 (d,  $^3J_{\text{HH}} = 7.8$  Hz, 1H), 7.41-7.31 (m, 4H), 7.11 (d,  $^3J_{\text{HH}} = 7.8$  Hz, 1H), 2.58 (dd,  $^3J_{\text{HH}} = 9.6$  and 6.9 Hz, 1H), 2.01-1.43 (m, 14H), 1.38-1.07 (m, 12H), 1.02 (t,  $^3J_{\text{HH}} = 7.3$  Hz, 3H).  $^{13}\text{C}\{^1\text{H}\}$  NMR ( $\text{CDCl}_3$ ):  $\delta$  157.4, 143.6, 139.9, 138.6, 131.0, 126.7, 125.8, 124.3, 123.3, 120.4, 33.5, 30.8, 29.04, 29.00, 28.5, 28.2, 28.1, 27.0, 24.9, 24.7, 14.5.  $^{29}\text{Si}\{^1\text{H}\}$  NMR ( $\text{CDCl}_3$ ):  $\delta$  15.2. IR (neat) 2919, 2845, 1568, 1459, 1445, 888, 845, 768, 740, 525  $\text{cm}^{-1}$ . HRMS (FAB) calcd for  $\text{C}_{26}\text{H}_{36}\text{SSi}$  ( $\text{M}^+$ ) 408.2301, found: 408.2314.

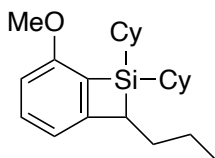

**Compound 2o.** Hexane/EtOAc = 100/1  $\rightarrow$  50/1 was used for the preparative TLC. Colorless oil (44.1 mg, 0.124 mmol; 62% yield, containing ca. 5% impurity).

$^1\text{H}$  NMR ( $\text{CDCl}_3$ ):  $\delta$  7.27 (dd,  $^3J_{\text{HH}} = 8.2$  and 7.4 Hz, 1H), 6.80 (d,  $^3J_{\text{HH}} = 7.8$  Hz, 1H), 6.66 (d,  $^3J_{\text{HH}} = 8.2$  Hz, 1H), 3.77 (s, 3H), 2.53 (dd,  $^3J_{\text{HH}} = 9.6$  and 6.4 Hz, 1H), 1.96-1.61 (m, 12H), 1.61-1.06 (m, 14H), 1.00 (t,  $^3J_{\text{HH}} = 7.3$  Hz, 3H).  $^{13}\text{C}\{^1\text{H}\}$  NMR ( $\text{CDCl}_3$ ):  $\delta$  161.2, 158.2, 132.1, 125.5, 117.4, 110.8, 55.2, 33.5, 31.5, 29.0, 28.7, 28.4, 28.30, 28.28, 28.09, 28.08, 27.0, 26.9, 24.9, 24.8, 24.5, 14.5.  $^{29}\text{Si}\{^1\text{H}\}$  NMR ( $\text{CDCl}_3$ ):  $\delta$  13.7. IR (neat) 3055, 2920, 2846, 1584, 1561, 1463, 1445, 1255, 1096, 1042, 888, 784  $\text{cm}^{-1}$ . HRMS (FAB) calcd for  $\text{C}_{23}\text{H}_{36}\text{OSi}$  ( $\text{M}^+$ ) 356.2530, found: 356.2525.

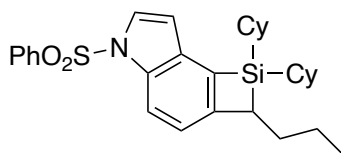

**Compound 2p.** Hexane/EtOAc = 10/1  $\rightarrow$  30/1 was used for the preparative TLC. This was further purified by recrystallization from  $\text{CH}_2\text{Cl}_2/\text{MeOH}$  at room temperature. Colorless solid (27.7 mg, 54.7  $\mu\text{mol}$ ; 27% yield).

$^1\text{H}$  NMR ( $\text{CDCl}_3$ ):  $\delta$  7.97 (d,  $^3J_{\text{HH}} = 8.7$  Hz, 1H), 7.94-7.87 (m, 2H), 7.60 (d,  $^3J_{\text{HH}} = 3.7$  Hz, 1H), 7.57-7.49 (m, 1H), 7.49-7.40 (m, 2H), 7.11 (d,  $^3J_{\text{HH}} = 8.2$  Hz, 1H), 6.51 (d,  $^3J_{\text{HH}} = 3.6$  Hz, 1H), 2.58 (dd,  $^3J_{\text{HH}} = 9.6$  and 6.4 Hz, 1H), 1.94-1.59 (m, 12H), 1.57-1.08 (m, 14H), 0.98 (t,  $^3J_{\text{HH}} = 7.1$  Hz, 3H).  $^{13}\text{C}\{^1\text{H}\}$  NMR ( $\text{CDCl}_3$ ):  $\delta$  152.4, 138.8, 135.6, 133.8, 133.3, 132.6, 129.4, 127.0, 126.9, 121.2, 115.8,

110.1, 34.0, 31.8, 28.7, 28.6, 28.2, 28.04, 27.97, 26.9, 26.8, 24.69, 24.66, 24.2, 14.5.  $^{29}\text{Si}\{^1\text{H}\}$  NMR ( $\text{CDCl}_3$ ):  $\delta$  14.3. IR (KBr) 2920, 2846, 1447, 1369, 1187, 1165, 1143, 727, 607, 590  $\text{cm}^{-1}$ . Mp 172–174  $^\circ\text{C}$ . HRMS (FAB) calcd for  $\text{C}_{30}\text{H}_{40}\text{NO}_2\text{SSi}$  ( $\text{M}+\text{H}^+$ ) 506.2544, found: 506.2541.

### General Procedure for Compounds 2q–2t in Scheme 3.

$\text{Et}_2\text{NH}$  (41.4  $\mu\text{L}$ , 0.400 mmol) was added to a mixture of  $\text{Pd}(\text{OAc})_2$  (2.2 mg, 10  $\mu\text{mol}$ ), dtbpf (5.2 mg, 11  $\mu\text{mol}$ ), and compound **1** (0.200 mmol) in DMF (0.80 mL), and the resulting solution was stirred for 18 h at 80  $^\circ\text{C}$ . After cooled to room temperature, the reaction mixture was diluted with  $\text{Et}_2\text{O}$  and  $\text{H}_2\text{O}$  was added. This was extracted with  $\text{Et}_2\text{O}$ , and the organic layer was washed with saturated  $\text{NaCl}$  aq, dried over  $\text{MgSO}_4$ , filtered, and concentrated under vacuum. The residue was purified by silica gel preparative TLC with hexane to afford compound **2**.

### General Procedure for Compounds 2u–2v in Scheme 3.

$\text{Et}_2\text{NH}$  (41.4  $\mu\text{L}$ , 0.400 mmol) was added to a mixture of  $\text{Pd}(\text{OAc})_2$  (2.2 mg, 10  $\mu\text{mol}$ ), dtbpf (5.2 mg, 11  $\mu\text{mol}$ ), and compound **1** (0.200 mmol) in DMF (4.0 mL), and the resulting solution was stirred for 18 h at 100  $^\circ\text{C}$ . After cooled to room temperature, the reaction mixture was diluted with  $\text{Et}_2\text{O}$  and  $\text{H}_2\text{O}$  was added. This was extracted with  $\text{Et}_2\text{O}$ , and the organic layer was washed with saturated  $\text{NaCl}$  aq, dried over  $\text{MgSO}_4$ , filtered, and concentrated under vacuum. The residue was purified by silica gel preparative TLC with hexane to afford compound **2**.

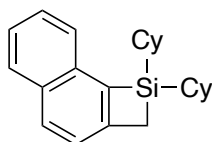

**Compound 2q.** White solid (56.9 mg, 0.170 mmol; 85% yield). The reaction could be scaled up using 3.01 mmol of **1q** to give **2q** in 82% yield (823 mg, 2.46 mmol).

$^1\text{H}$  NMR ( $\text{CDCl}_3$ ):  $\delta$  7.84 (d,  $^3J_{\text{HH}} = 8.2$  Hz, 1H), 7.81 (d,  $^3J_{\text{HH}} = 8.2$  Hz, 1H), 7.71 (d,  $^3J_{\text{HH}} = 7.8$  Hz, 1H), 7.51 (ddd,  $^3J_{\text{HH}} = 7.8$  and 6.9 Hz and  $^4J_{\text{HH}} = 1.4$  Hz, 1H), 7.45 (ddd,  $^3J_{\text{HH}} = 8.2$  and 6.9 Hz and  $^4J_{\text{HH}} = 1.4$  Hz, 1H), 7.28 (d,  $^3J_{\text{HH}} = 8.2$  Hz, 1H), 2.18 (s, 2H), 2.00–1.83 (m, 4H), 1.83–1.63 (m, 6H), 1.48–1.15 (m, 12H).  $^{13}\text{C}\{^1\text{H}\}$  NMR ( $\text{CDCl}_3$ ):  $\delta$  150.9, 142.0, 135.2, 132.3, 130.9, 129.0, 128.3, 126.4, 125.5, 125.0, 28.5, 28.09, 28.06, 28.0, 26.9, 24.4, 14.4.  $^{29}\text{Si}\{^1\text{H}\}$  NMR ( $\text{CDCl}_3$ ):  $\delta$  15.1. IR (KBr) 3040, 2917, 2844, 1505, 1444, 890, 847, 812, 780, 738, 715, 546  $\text{cm}^{-1}$ . HRMS (FAB) calcd for  $\text{C}_{23}\text{H}_{30}\text{Si}$  ( $\text{M}^+$ ) 334.2111, found: 334.2112.

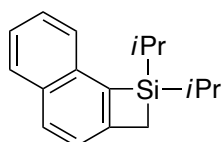

**Compound 2r.** Colorless oil. (35.4 mg, 0.139 mmol; 70% yield).

$^1\text{H}$  NMR ( $\text{CDCl}_3$ ):  $\delta$  7.87-7.79 (m, 2H), 7.70 (d,  $^3J_{\text{HH}} = 7.8$  Hz, 1H), 7.49 (ddd,  $^3J_{\text{HH}} = 7.8$  and 6.9 Hz and  $^4J_{\text{HH}} = 1.4$  Hz, 1H), 7.44 (ddd,  $^3J_{\text{HH}} = 7.8$  and 6.9 Hz and  $^4J_{\text{HH}} = 1.4$  Hz, 1H), 7.29 (d,  $^3J_{\text{HH}} = 8.3$  Hz, 1H), 2.18 (s, 2H), 1.40 (sept,  $^3J_{\text{HH}} = 7.8$  Hz, 2H), 1.18 (d,  $^3J_{\text{HH}} = 7.8$  Hz, 6H), 1.13 (d,  $^3J_{\text{HH}} = 7.3$  Hz, 6H).  $^{13}\text{C}\{^1\text{H}\}$  NMR ( $\text{CDCl}_3$ ):  $\delta$  150.8, 141.7, 135.2, 132.3, 131.0, 129.0, 128.3, 126.5, 125.5, 125.1, 18.6, 18.2, 14.6, 12.8.  $^{29}\text{Si}\{^1\text{H}\}$  NMR ( $\text{CDCl}_3$ ):  $\delta$  20.6. IR (neat) 3043, 2939, 2863, 1504, 1461, 879, 814, 781, 738, 696, 614  $\text{cm}^{-1}$ . HRMS (EI) calcd for  $\text{C}_{17}\text{H}_{22}\text{Si}$  ( $\text{M}^+$ ) 254.1485, found: 254.1492.

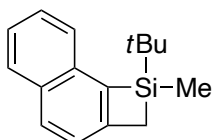

**Compound 2s.** Colorless oil. (25.2 mg, 0.105 mmol; 52% yield).

$^1\text{H}$  NMR ( $\text{CDCl}_3$ ):  $\delta$  7.88-7.80 (m, 2H), 7.70 (d,  $^3J_{\text{HH}} = 7.8$  Hz, 1H), 7.50 (ddd,  $^3J_{\text{HH}} = 7.8$  and 6.9 Hz and  $^4J_{\text{HH}} = 1.4$  Hz, 1H), 7.44 (ddd,  $^3J_{\text{HH}} = 8.2$  and 6.4 Hz and  $^4J_{\text{HH}} = 1.4$  Hz, 1H), 7.30 (d,  $^3J_{\text{HH}} = 8.7$  Hz, 1H), 2.31 (d,  $^2J_{\text{HH}} = 16.5$  Hz, 1H), 2.14 (d,  $^2J_{\text{HH}} = 16.5$  Hz, 1H), 1.11 (s, 9H), 0.54 (s, 3H).  $^{13}\text{C}\{^1\text{H}\}$  NMR ( $\text{CDCl}_3$ ):  $\delta$  150.1, 142.8, 134.9, 132.3, 131.2, 129.1, 128.0, 126.5, 125.6, 125.1, 26.5, 18.2, 17.1, -5.1.  $^{29}\text{Si}\{^1\text{H}\}$  NMR ( $\text{CDCl}_3$ ):  $\delta$  16.4. IR (neat) 3043, 2950, 2926, 2855, 1504, 1469, 1249, 1071, 829, 778, 761, 741, 593  $\text{cm}^{-1}$ . HRMS (EI) calcd for  $\text{C}_{16}\text{H}_{20}\text{Si}$  ( $\text{M}^+$ ) 240.1329, found: 240.1334.

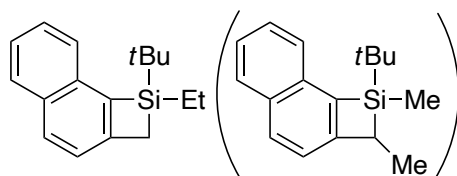

**Compound 2t.** Colorless oil. (40.8 mg, 0.154 mmol; 77% yield, selectivity = 96/4).

$^1\text{H}$  NMR ( $\text{CDCl}_3$ ):  $\delta$  7.84-7.77 (m, 2H), 7.67 (d,  $^3J_{\text{HH}} = 8.2$  Hz, 1H), 7.46 (ddd,  $^3J_{\text{HH}} = 7.8$  and 6.9 Hz and  $^4J_{\text{HH}} = 1.4$  Hz, 1H), 7.41 (ddd,  $^3J_{\text{HH}} = 7.8$  and 6.9 Hz and  $^4J_{\text{HH}} = 1.4$  Hz, 1H), 7.26 (d,  $^3J_{\text{HH}} = 8.2$  Hz, 1H), 2.20 (d,  $^2J_{\text{HH}} = 16.5$  Hz, 1H), 2.15 (d,  $^2J_{\text{HH}} = 16.5$  Hz, 1H), 1.16-0.95 (m, 14H).  $^{13}\text{C}\{^1\text{H}\}$  NMR ( $\text{CDCl}_3$ ):  $\delta$  150.5, 141.8, 135.2, 132.3, 131.0, 129.1, 128.1, 126.5, 125.5, 125.1, 27.0, 18.5, 15.1, 8.2, 3.9.  $^{29}\text{Si}\{^1\text{H}\}$  NMR ( $\text{CDCl}_3$ ):  $\delta$  20.6. IR (neat) 3043, 2952, 2926, 2855, 1504, 1469, 1361, 1070, 815, 782, 738, 704  $\text{cm}^{-1}$ . HRMS (EI) calcd for  $\text{C}_{17}\text{H}_{22}\text{Si}$  ( $\text{M}^+$ ) 254.1485, found: 254.1491.

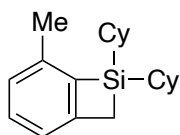

**Compound 2u.** Colorless oil. (48.9 mg, 0.164 mmol; 82% yield).

$^1\text{H}$  NMR ( $\text{CDCl}_3$ ):  $\delta$  7.20 (dd,  $^3J_{\text{HH}} = 7.8$  and 7.3 Hz, 1H), 6.99 (d,  $^3J_{\text{HH}} = 7.3$  Hz, 1H), 6.92 (d,  $^3J_{\text{HH}} = 7.8$  Hz, 1H), 2.30 (s, 3H), 2.01 (s, 2H), 1.88-1.62 (m, 10H), 1.36-1.07 (m, 12H).  $^{13}\text{C}\{^1\text{H}\}$  NMR ( $\text{CDCl}_3$ ):  $\delta$  151.7, 143.8, 140.9, 130.6, 126.4, 123.6, 28.5, 28.12, 28.10, 28.0, 26.9, 24.4, 22.7, 14.2.  $^{29}\text{Si}\{^1\text{H}\}$  NMR ( $\text{CDCl}_3$ ):  $\delta$  15.9. IR (neat) 3045, 2919, 2845, 1576, 1445, 1094, 887, 846, 817, 781, 755  $\text{cm}^{-1}$ . HRMS (EI) calcd for  $\text{C}_{20}\text{H}_{30}\text{Si}$  ( $\text{M}^+$ ) 298.2111, found: 298.2113.

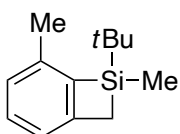

**Compound 2v.** Colorless oil. (20.4 mg, 0.100 mmol; 50% yield).

$^1\text{H}$  NMR ( $\text{CDCl}_3$ ):  $\delta$  7.23 (dd,  $^3J_{\text{HH}} = 7.8$  and 7.3 Hz, 1H), 7.01 (d,  $^3J_{\text{HH}} = 7.8$  Hz, 1H), 6.96 (d,  $^3J_{\text{HH}} = 7.3$  Hz, 1H), 2.30 (s, 3H), 2.16 (d,  $^2J_{\text{HH}} = 16.5$  Hz, 1H), 1.99 (d,  $^2J_{\text{HH}} = 16.5$  Hz, 1H), 1.03 (s, 9H), 0.43 (s, 3H).  $^{13}\text{C}\{^1\text{H}\}$  NMR ( $\text{CDCl}_3$ ):  $\delta$  150.9, 144.7, 140.8, 130.8, 126.5, 123.8, 26.5, 22.3, 18.1, 16.9, -5.4.  $^{29}\text{Si}\{^1\text{H}\}$  NMR ( $\text{CDCl}_3$ ):  $\delta$  17.5. IR (neat) 3048, 2951, 2926, 2856, 1575, 1461, 1248, 1093, 827, 771, 601  $\text{cm}^{-1}$ . HRMS (EI) calcd for  $\text{C}_{13}\text{H}_{20}\text{Si}$  ( $\text{M}^+$ ) 204.1329, found: 204.1326.

#### General Procedure for Scheme 4a.

Alkyne **3** (0.225 mmol) was added to a mixture of  $\text{Pd}(\text{PPh}_3)_4$  (8.7 mg, 7.5  $\mu\text{mol}$ ) and compound **2** (0.150 mmol) in toluene (375  $\mu\text{L}$ ), and the resulting solution was stirred for 15 h at 110  $^\circ\text{C}$ . After cooled to room temperature, the mixture was passed through a pad of silica gel with EtOAc. The solvent was removed under vacuum, and the residue was purified by silica gel preparative TLC to afford compound **4**.

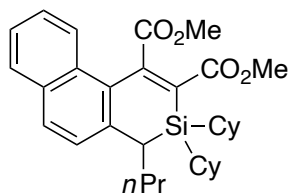

**Compound 4aa.** Hexane/EtOAc = 5/1 was used for the preparative TLC. White amorphous (41.2 mg, 79.4  $\mu\text{mol}$ ; 53% yield).

$^1\text{H}$  NMR ( $\text{CDCl}_3$ ):  $\delta$  7.82-7.75 (m, 1H), 7.72 (d,  $^3J_{\text{HH}} = 8.3$  Hz, 1H), 7.69-7.61 (m, 1H), 7.42-7.35 (m, 2H), 7.28 (d,  $^3J_{\text{HH}} = 8.2$  Hz, 1H), 3.84 (s, 3H), 2.70 (s, 3H), 2.20 (dd,  $^3J_{\text{HH}} = 11.4$  and 2.7 Hz, 1H), 1.87-1.65 (m, 6H), 1.65-1.16 (m, 13H), 1.16-0.54 (m, 10H).  $^{13}\text{C}\{^1\text{H}\}$  NMR ( $\text{CDCl}_3$ ):  $\delta$  171.8, 168.9, 142.2, 142.1, 139.8, 132.7, 131.9, 130.0, 129.2, 128.8, 126.3, 125.0, 123.9, 52.5, 52.0, 31.5, 28.9, 28.6,

28.4, 28.3, 28.24, 28.22, 27.8, 27.7, 27.0, 26.6, 22.6, 22.4, 22.1, 14.4.  $^{29}\text{Si}\{^1\text{H}\}$  NMR ( $\text{CDCl}_3$ ):  $\delta$  -7.9. IR (KBr) 2922, 2848, 1718, 1446, 1433, 1228, 1197, 1179, 1045, 742  $\text{cm}^{-1}$ . HRMS (FAB) calcd for  $\text{C}_{32}\text{H}_{42}\text{O}_4\text{Si}$  ( $\text{M}^+$ ) 518.2847, found: 518.2854.

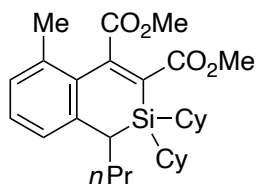

**Compound 4ia.** Hexane/EtOAc = 5/1 was used for the preparative TLC. Colorless oil (37.9 mg, 78.5  $\mu\text{mol}$ ; 52% yield).

$^1\text{H}$  NMR ( $\text{CDCl}_3$ ):  $\delta$  7.08 (t,  $^3J_{\text{HH}} = 7.6$  Hz, 1H), 6.98 (d,  $^3J_{\text{HH}} = 7.4$  Hz, 1H), 6.96 (d,  $^3J_{\text{HH}} = 7.4$  Hz, 1H), 3.78 (s, 3H), 3.76 (s, 3H), 2.16 (s, 3H), 2.12-2.01 (m, 1H), 1.84-1.34 (m, 13H), 1.34-1.13 (m, 6H), 1.13-0.52 (m, 10H).  $^{13}\text{C}\{^1\text{H}\}$  NMR ( $\text{CDCl}_3$ ):  $\delta$  171.6, 168.4, 143.3, 141.0, 140.8, 137.1, 133.1, 129.3, 128.4, 52.4, 51.9, 31.3, 28.6, 28.5, 28.4, 28.34, 28.32, 28.25, 28.22, 27.9, 27.5, 27.0, 26.8, 22.6, 22.3, 22.1, 20.9, 14.3.  $^{29}\text{Si}\{^1\text{H}\}$  NMR ( $\text{CDCl}_3$ ):  $\delta$  -8.6. IR (neat) 2922, 2848, 1731, 1582, 1446, 1227, 1060, 1011, 891, 742  $\text{cm}^{-1}$ . HRMS (FAB) calcd for  $\text{C}_{29}\text{H}_{42}\text{O}_4\text{Si}$  ( $\text{M}^+$ ) 482.2847, found: 482.2849.

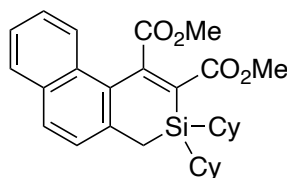

**Compound 4qa.** Hexane/EtOAc = 5/1 was used for the preparative TLC. White amorphous (70.4 mg, 0.148 mmol; 99% yield).

$^1\text{H}$  NMR ( $\text{CDCl}_3$ ):  $\delta$  7.82-7.75 (m, 1H), 7.75-7.68 (m, 2H), 7.43-7.36 (m, 2H), 7.33 (d,  $^3J_{\text{HH}} = 8.2$  Hz, 1H), 3.84 (s, 3H), 3.72 (s, 3H), 2.31 (s, 2H), 1.71-1.52 (m, 10H), 1.20-0.87 (m, 12H).  $^{13}\text{C}\{^1\text{H}\}$  NMR ( $\text{CDCl}_3$ ):  $\delta$  171.5, 169.4, 144.7, 140.7, 136.5, 132.6, 131.8, 129.9, 129.7, 129.4, 128.9, 126.5, 124.9, 123.6, 52.5, 52.1, 28.1, 27.9, 26.7, 22.6, 16.7.  $^{29}\text{Si}\{^1\text{H}\}$  NMR ( $\text{CDCl}_3$ ):  $\delta$  -7.0. IR (KBr) 2923, 2847, 1736, 1716, 1445, 1228, 1177, 1049, 822, 744  $\text{cm}^{-1}$ . HRMS (FAB) calcd for  $\text{C}_{29}\text{H}_{36}\text{O}_4\text{Si}$  ( $\text{M}^+$ ) 476.2377, found: 476.2381.

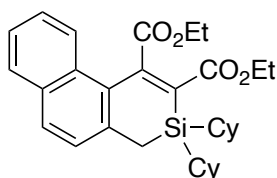

**Compound 4qb.** 0.153 mmol of **2q** was used. Hexane/EtOAc = 6/1 was used for the preparative TLC. White solid (76.0 mg, 0.151 mmol; 99% yield).

$^1\text{H}$  NMR ( $\text{CDCl}_3$ ):  $\delta$  7.84-7.74 (m, 2H), 7.70 (d,  $^3J_{\text{HH}} = 8.3$  Hz, 1H), 7.42-7.34 (m, 2H), 7.32 (d,  $^3J_{\text{HH}} = 8.3$  Hz, 1H), 4.30 (q,  $^3J_{\text{HH}} = 7.2$  Hz, 2H), 4.22 (q,  $^3J_{\text{HH}} = 7.0$  Hz, 2H), 2.31 (s, 2H), 1.72-1.55

(m, 10H), 1.37 (t,  $^3J_{\text{HH}} = 7.1$  Hz, 3H), 1.20 (t,  $^3J_{\text{HH}} = 7.1$  Hz, 3H), 1.18-0.87 (m, 12H).  $^{13}\text{C}\{^1\text{H}\}$  NMR ( $\text{CDCl}_3$ ):  $\delta$  171.0, 168.9, 144.8, 140.4, 136.4, 132.6, 131.8, 129.72, 129.67, 128.8, 126.1, 124.7, 124.0, 61.6, 61.0, 28.1, 27.9, 26.7, 22.5, 16.6, 14.4, 13.9.  $^{29}\text{Si}\{^1\text{H}\}$  NMR ( $\text{CDCl}_3$ ):  $\delta$  -7.0. IR (KBr) 2921, 2848, 1721, 1707, 1246, 1224, 1181, 1044, 822, 743  $\text{cm}^{-1}$ . HRMS (FAB) calcd for  $\text{C}_{31}\text{H}_{40}\text{O}_4\text{Si}$  ( $\text{M}^+$ ) 504.2690, found: 504.2696.

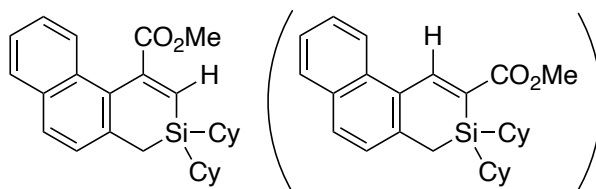

**Compound 4qc.** Hexane/EtOAc = 8/1 was used for the preparative TLC. Pale yellow oil (18.8 mg, 41.8  $\mu\text{mol}$ ; 28% yield, regioselectivity: 82/18).

$^1\text{H}$  NMR ( $\text{CDCl}_3$ ):  $\delta$  9.20 (s, 0.18H), 8.34 (d,  $^3J_{\text{HH}} = 8.7$  Hz, 0.18H), 7.85-7.64 (m, 2H), 7.60-7.49 (m, 1H), 7.48-7.31 (m, 2.82H), 7.29 (s, 0.82H), 3.87 (s, 0.54H), 3.71 (s, 2.46H), 2.34 (s, 0.36H), 2.22 (s, 1.64H), 1.83-1.50 (m, 10H), 1.35-0.80 (m, 12H).  $^{13}\text{C}\{^1\text{H}\}$  NMR ( $\text{CDCl}_3$ , major isomer):  $\delta$  170.8, 148.1, 138.6, 135.9, 132.5, 131.4, 130.8, 129.9, 128.7, 128.6, 125.8, 124.5, 124.2, 52.2, 28.3, 28.1, 26.8, 22.5, 16.7. IR (KBr) 2918, 2845, 1718, 1594, 1445, 1219, 1070, 1000, 820, 741  $\text{cm}^{-1}$ . HRMS (FAB) calcd for  $\text{C}_{27}\text{H}_{34}\text{O}_2\text{Si}$  ( $\text{M}^+$ ) 418.2323, found: 418.2325.

#### General Procedure for Scheme 4b.

Aldehyde **5** (0.240 mmol) was added to a mixture of  $\text{Ni}(\text{cod})_2$  (5.5 mg, 20  $\mu\text{mol}$ ),  $\text{PPh}_3$  (10.5 mg, 40.0  $\mu\text{mol}$ ), and compound **2** (0.200 mmol) in toluene (1.2 mL), and the resulting solution was stirred for 20 h at 100  $^\circ\text{C}$ . After cooled to room temperature, the mixture was passed through a pad of silica gel with  $\text{CH}_2\text{Cl}_2$ . The solvent was removed under vacuum, and the residue was purified by silica gel preparative TLC and further purified by GPC with  $\text{CHCl}_3$  to afford compound **6**.

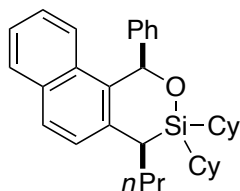

**Compound 6aa.** Hexane/EtOAc = 100/1 was used for the preparative TLC. Pale yellow amorphous (66.5 mg, 0.138 mmol; 69% yield, dr = 89/11). For analytical purpose, the diastereomers were separated by further purification using silica gel preparative TLC with hexane/EtOAc = 100/1. The relative configuration of the major diastereomer was determined to be *cis* by X-ray crystallographic analysis after recrystallization from  $\text{CH}_2\text{Cl}_2/\text{MeOH}$ .

**cis-6aa:**  $^1\text{H}$  NMR ( $\text{CDCl}_3$ ):  $\delta$  7.89-7.83 (m, 1H), 7.75 (d,  $^3J_{\text{HH}} = 8.2$  Hz, 1H), 7.71 (d,  $^3J_{\text{HH}} = 8.2$

Hz, 1H), 7.46-7.36 (m, 2H), 7.30-7.15 (m, 6H), 6.96 (s, 1H), 2.28 (dd,  $^3J_{\text{HH}} = 11.9$  and  $4.1$  Hz, 1H), 2.09-1.99 (m, 1H), 1.87-1.66 (m, 4H), 1.62-1.13 (m, 11H), 1.13-0.80 (m, 8H), 0.78-0.67 (m, 1H), 0.66-0.50 (m, 4H).  $^{13}\text{C}\{^1\text{H}\}$  NMR ( $\text{CDCl}_3$ ):  $\delta$  144.8, 138.4, 134.4, 133.0, 132.2, 132.1, 128.7, 128.0, 127.7, 127.3, 127.1, 126.4, 124.9, 123.6, 74.2, 32.7, 28.4, 28.3, 28.24, 28.21, 28.17, 28.15, 27.4, 27.3, 27.2, 26.8, 25.5, 25.3, 22.2, 14.0.  $^{29}\text{Si}\{^1\text{H}\}$  NMR ( $\text{CDCl}_3$ ):  $\delta$  5.4. IR (KBr) 3055, 2919, 2846, 1446, 1094, 1069, 935, 818, 741, 697  $\text{cm}^{-1}$ . HRMS (FAB) calcd for  $\text{C}_{33}\text{H}_{42}\text{OSi}$  ( $\text{M}^+$ ) 482.2999, found: 482.3000.

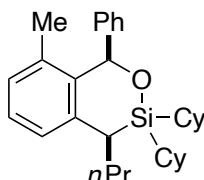

**Compound 6ia.** The diastereoselectivity was 95/5 before purification. Hexane/EtOAc = 100/1 was used for the preparative TLC. White amorphous (68.0 mg, 0.152 mmol; 76% yield, single diastereomer). The relative configuration was determined to be *cis* by X-ray crystallographic analysis after recrystallization from  $\text{CH}_2\text{Cl}_2/\text{MeOH}$ .

***cis*-6ia:**  $^1\text{H}$  NMR ( $\text{CDCl}_3$ ):  $\delta$  7.30-7.11 (m, 6H), 7.06 (dd,  $^3J_{\text{HH}} = 7.8$  Hz and  $^4J_{\text{HH}} = 0.9$  Hz, 1H), 6.98 (d,  $^3J_{\text{HH}} = 7.3$  Hz, 1H), 6.30 (s, 1H), 2.20 (s, 3H), 2.11 (dd,  $^3J_{\text{HH}} = 12.4$  and  $4.1$  Hz, 1H), 2.06-1.96 (m, 1H), 1.86-1.64 (m, 4H), 1.62-1.48 (m, 4H), 1.45-0.48 (m, 20H).  $^{13}\text{C}\{^1\text{H}\}$  NMR ( $\text{CDCl}_3$ ):  $\delta$  144.3, 139.8, 138.3, 135.9, 132.2, 128.0, 127.9, 127.1, 127.0, 126.7, 74.5, 32.4, 28.4, 28.22, 28.20, 28.1, 28.0, 27.7, 27.4, 27.3, 27.1, 27.0, 25.2, 25.3, 21.9, 19.9, 13.8.  $^{29}\text{Si}\{^1\text{H}\}$  NMR ( $\text{CDCl}_3$ ):  $\delta$  6.2. IR (KBr) 3063, 2919, 2846, 1491, 1460, 1444, 1173, 1094, 1060, 743  $\text{cm}^{-1}$ . HRMS (FAB) calcd for  $\text{C}_{30}\text{H}_{42}\text{OSi}$  ( $\text{M}^+$ ) 446.2999, found: 446.3008.

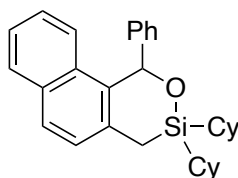

**Compound 6qa.** Hexane/EtOAc = 50/1 and then hexane/EtOAc = 500/1 were used for the preparative TLC. White amorphous (76.6 mg, 0.174 mmol; 87% yield).

$^1\text{H}$  NMR ( $\text{CDCl}_3$ ):  $\delta$  7.89-7.82 (m, 1H), 7.82-7.74 (m, 2H), 7.44-7.38 (m, 2H), 7.36 (d,  $^3J_{\text{HH}} = 8.7$  Hz, 1H), 7.29-7.16 (m, 5H), 7.01 (s, 1H), 2.08 (d,  $^2J_{\text{HH}} = 15.1$  Hz, 1H), 1.96 (d,  $^2J_{\text{HH}} = 15.6$  Hz, 1H), 1.74-1.43 (m, 10H), 1.22-0.62 (m, 12H).  $^{13}\text{C}\{^1\text{H}\}$  NMR ( $\text{CDCl}_3$ ):  $\delta$  142.8, 134.6, 134.1, 131.9, 131.5, 130.8, 128.8, 128.33, 128.29, 127.9, 127.5, 126.5, 124.6, 122.6, 74.3, 28.10, 28.08, 28.01, 27.99, 27.5, 27.4, 27.0, 26.9, 26.8, 25.44, 25.39, 15.7.  $^{29}\text{Si}\{^1\text{H}\}$  NMR ( $\text{CDCl}_3$ ):  $\delta$  8.1. IR (KBr) 3053, 2918, 2845, 1446, 1083, 1065, 937, 815, 741, 699  $\text{cm}^{-1}$ . HRMS (FAB) calcd for  $\text{C}_{30}\text{H}_{36}\text{OSi}$  ( $\text{M}^+$ ) 440.2530, found: 440.2531.

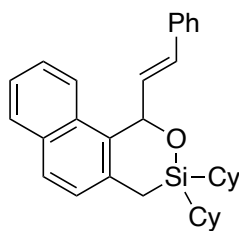

**Compound 6qb.** Hexane/EtOAc = 8/1 was used for the preparative TLC. White amorphous (76.7 mg, 0.164 mmol; 82% yield).

$^1\text{H}$  NMR ( $\text{CDCl}_3$ ):  $\delta$  7.97 (d,  $^3J_{\text{HH}} = 8.7$  Hz, 1H), 7.86 (d,  $^3J_{\text{HH}} = 7.8$  Hz, 1H), 7.75 (d,  $^3J_{\text{HH}} = 8.2$  Hz, 1H), 7.51 (t,  $^3J_{\text{HH}} = 7.3$  Hz, 1H), 7.44 (t,  $^3J_{\text{HH}} = 7.3$  Hz, 1H), 7.33 (d,  $^3J_{\text{HH}} = 8.2$  Hz, 1H), 7.32-7.23 (m, 4H), 7.19 (t,  $^3J_{\text{HH}} = 6.9$  Hz, 1H), 6.59 (d,  $^3J_{\text{HH}} = 5.0$  Hz, 1H), 6.53 (dd,  $^3J_{\text{HH}} = 15.8$  and 5.3 Hz, 1H), 6.32 (d,  $^3J_{\text{HH}} = 15.6$  Hz, 1H), 2.25 (d,  $^2J_{\text{HH}} = 15.6$  Hz, 1H), 2.12 (d,  $^2J_{\text{HH}} = 15.1$  Hz, 1H), 2.04-1.66 (m, 5H), 1.66-1.44 (m, 5H), 1.44-1.17 (m, 5H), 1.17-0.63 (m, 7H).  $^{13}\text{C}\{^1\text{H}\}$  NMR ( $\text{CDCl}_3$ ):  $\delta$  137.0, 134.0, 133.9, 132.0, 130.95, 130.87, 130.1, 128.9, 128.6, 128.2, 127.6, 126.7, 126.5, 124.7, 122.4, 73.2, 28.20, 28.16, 28.0, 27.9, 27.5, 27.42, 27.37, 27.3, 27.1, 26.8, 25.3, 25.1, 15.3.  $^{29}\text{Si}\{^1\text{H}\}$  NMR ( $\text{CDCl}_3$ ):  $\delta$  7.7. IR (neat) 3052, 2918, 2845, 1596, 1509, 1445, 1069, 933, 820, 735 $\text{cm}^{-1}$ . HRMS (FAB) calcd for  $\text{C}_{32}\text{H}_{38}\text{OSi}$  ( $\text{M}^+$ ) 466.2686, found: 466.2696.

#### Procedure for Scheme 6a.

$\text{Et}_2\text{NH}$  (41.4  $\mu\text{L}$ , 0.400 mmol) was added to a mixture of  $\text{Pd}(\text{OAc})_2$  (2.2 mg, 10  $\mu\text{mol}$ ), dtbpf (5.2 mg, 11  $\mu\text{mol}$ ), and compound **1s-d<sub>3</sub>** (78.7 mg, 0.200 mmol) in DMF (0.80 mL), and the resulting solution was stirred for 18 h at 80  $^\circ\text{C}$ . After cooled to room temperature, the reaction mixture was diluted with  $\text{Et}_2\text{O}$  and  $\text{H}_2\text{O}$  was added. This was extracted with  $\text{Et}_2\text{O}$ , and the organic layer was washed with saturated NaCl<sub>aq</sub>, dried over  $\text{MgSO}_4$ , filtered, and concentrated under vacuum. The residue was purified by silica gel preparative TLC with hexane to afford a mixture of compounds **2s-d<sub>3</sub>** and **2s-d<sub>2</sub>** (19.5 mg, 80.1  $\mu\text{mol}$ ; 40% yield, **2s-d<sub>3</sub>**/**2s-d<sub>2</sub>** = 7.5/1).

#### Procedure for Scheme 6b.

$\text{Et}_2\text{NH}$  (41.4  $\mu\text{L}$ , 0.400 mmol) was added to a mixture of  $\text{Pd}(\text{OAc})_2$  (2.2 mg, 10  $\mu\text{mol}$ ) and dtbpf (5.2 mg, 11  $\mu\text{mol}$ ) in DMF (0.30 mL), and the resulting solution was stirred for 20 min at 80  $^\circ\text{C}$ . A solution of compound **1q** (48.5 mg, 0.100 mmol) and compound **1q-d<sub>3</sub>** (48.7 mg, 0.100 mmol) in DMF (0.50 mL) was added to it and the resulting solution was stirred for 15 min at 80  $^\circ\text{C}$ . The reaction was quenched with  $\text{H}_2\text{O}$  and this was extracted with  $\text{Et}_2\text{O}$ . The organic layer was washed with saturated NaCl<sub>aq</sub>, dried over  $\text{MgSO}_4$ , filtered, and concentrated under vacuum. The residue was purified by silica gel preparative TLC with hexane to afford a mixture of compounds **2q** and **2q-d<sub>2</sub>** (7.5 mg, 22  $\mu\text{mol}$ ; 11% yield, **2q**/**2q-d<sub>2</sub>** = 1.2/1).



## IV. X-ray Crystal Structures

### Compound **2g**

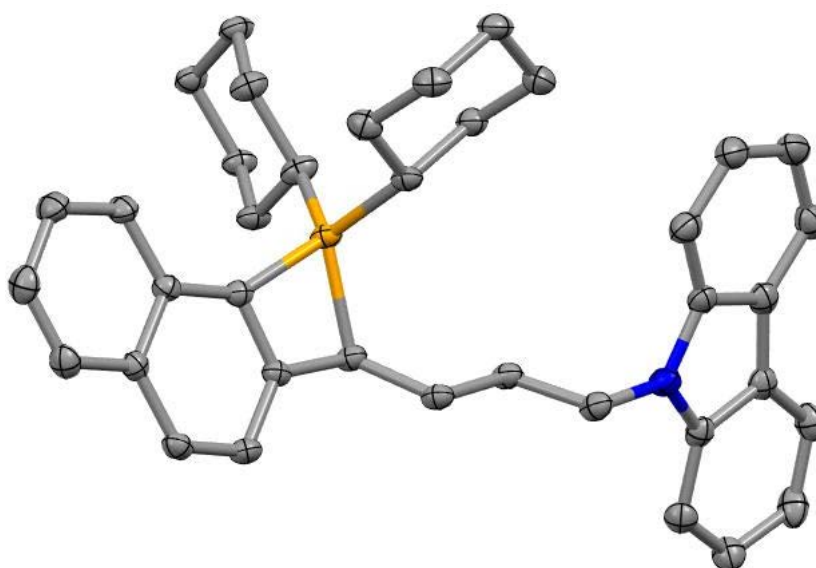

A colorless hexane solution of compound **2g** was prepared. Crystals suitable for X-ray analysis were obtained by slow evaporation of the solvent at room temperature. The crystal structure has been deposited at the Cambridge Crystallographic Data Centre (deposition number: CCDC 2237530). The data can be obtained free of charge via the Internet at <https://www.ccdc.cam.ac.uk/structures/>.

### Crystal Data and Structure Refinement.

|                      |                                     |                 |
|----------------------|-------------------------------------|-----------------|
| Empirical Formula    | C <sub>38</sub> H <sub>43</sub> NSi |                 |
| Formula Weight       | 541.82                              |                 |
| Temperature          | 113.15 K                            |                 |
| Wavelength           | 0.71073 Å                           |                 |
| Crystal System       | Monoclinic                          |                 |
| Space Group          | P2 <sub>1</sub> /c                  |                 |
| Unit Cell Dimensions | a = 22.9951(8) Å                    | α = 90°         |
|                      | b = 8.0662(3) Å                     | β = 106.116(4)° |
|                      | c = 35.0695(12) Å                   | γ = 90°         |

|                                   |                                                 |
|-----------------------------------|-------------------------------------------------|
| Volume                            | 6249.2(4) Å <sup>3</sup>                        |
| Z Value                           | 8                                               |
| Calculated Density                | 1.152 g/cm <sup>3</sup>                         |
| Absorption coefficient            | 0.102 mm <sup>-1</sup>                          |
| F(000)                            | 2336                                            |
| Crystal size                      | 0.500 x 0.200 x 0.050 mm                        |
| Theta Range for Data Collection   | 2.495–25.325°                                   |
| Index Ranges                      | -27 ≤ h ≤ 27, -9 ≤ k ≤ 9, -42 ≤ l ≤ 42          |
| Reflections Collected             | 59490                                           |
| Independent Reflections           | 11450 [R(int) = 0.0788]                         |
| Completeness to Theta = 25.242°   | 99.8%                                           |
| Absorption Correction             | Semi-empirical from equivalents                 |
| Max. and Min. Transmission        | 1.00000 and 0.77709                             |
| Refinement Method                 | Full-matrix least-squares on F <sup>2</sup>     |
| Data / Restraints / Parameters    | 11450 / 432 / 850                               |
| Goodness-of-Fit on F <sup>2</sup> | 1.108                                           |
| Final R Indices [I > 2σ(I)]       | R1 = 0.0779, wR2 = 0.1526                       |
| R Indices (All Data)              | R1 = 0.1274, wR2 = 0.1699                       |
| Largest Diff. Peak and Hole       | 0.395 and -0.589 e <sup>-</sup> /Å <sup>3</sup> |

## Compound 2p

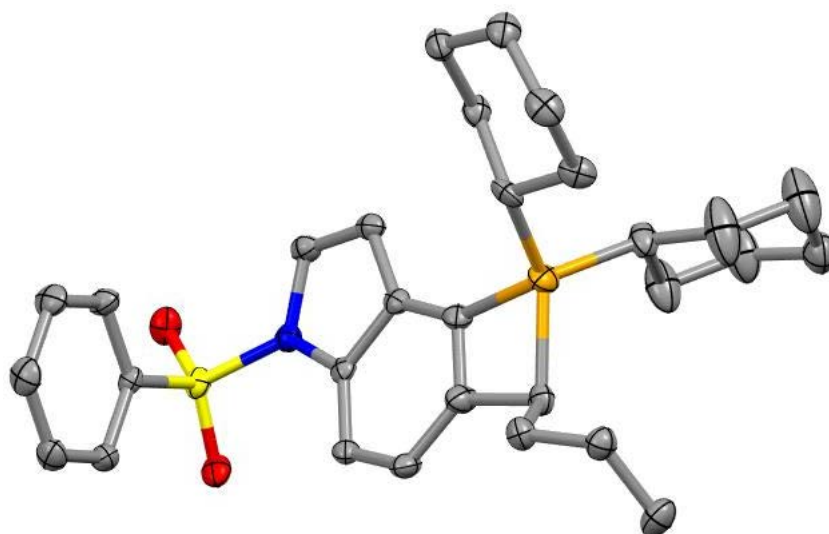

A colorless  $\text{CH}_2\text{Cl}_2$  solution of compound **2p** was prepared. Crystals suitable for X-ray analysis were obtained by layering MeOH and slow diffusion of the solvents at room temperature. The crystal structure has been deposited at the Cambridge Crystallographic Data Centre (deposition number: CCDC 2237529). The data can be obtained free of charge via the Internet at <https://www.ccdc.cam.ac.uk/structures/>.

### Crystal Data and Structure Refinement.

|                      |                                                   |                             |
|----------------------|---------------------------------------------------|-----------------------------|
| Empirical Formula    | $\text{C}_{30}\text{H}_{39}\text{NO}_2\text{SSi}$ |                             |
| Formula Weight       | 505.77                                            |                             |
| Temperature          | 113.15 K                                          |                             |
| Wavelength           | 0.71073 Å                                         |                             |
| Crystal System       | Monoclinic                                        |                             |
| Space Group          | $\text{P}2_1/\text{c}$                            |                             |
| Unit Cell Dimensions | $a = 18.8834(16)$ Å                               | $\alpha = 90^\circ$         |
|                      | $b = 10.0790(6)$ Å                                | $\beta = 111.762(10)^\circ$ |
|                      | $c = 15.7187(14)$ Å                               | $\gamma = 90^\circ$         |
| Volume               | 2778.5(4) Å <sup>3</sup>                          |                             |

|                                   |                                                 |
|-----------------------------------|-------------------------------------------------|
| Z Value                           | 4                                               |
| Calculated Density                | 1.209 g/cm <sup>3</sup>                         |
| Absorption coefficient            | 0.187 mm <sup>-1</sup>                          |
| F(000)                            | 1088                                            |
| Crystal size                      | 0.200 x 0.100 x 0.050 mm                        |
| Theta Range for Data Collection   | 2.321–28.228°                                   |
| Index Ranges                      | -24 ≤ h ≤ 25, -13 ≤ k ≤ 13, -18 ≤ l ≤ 21        |
| Reflections Collected             | 45872                                           |
| Independent Reflections           | 7294 [R(int) = 0.0580]                          |
| Completeness to Theta = 25.242°   | 99.9%                                           |
| Absorption Correction             | Semi-empirical from equivalents                 |
| Max. and Min. Transmission        | 1.00000 and 0.63788                             |
| Refinement Method                 | Full-matrix least-squares on F <sup>2</sup>     |
| Data / Restraints / Parameters    | 7294 / 463 / 465                                |
| Goodness-of-Fit on F <sup>2</sup> | 1.030                                           |
| Final R Indices [I > 2sigma(I)]   | R1 = 0.0590, wR2 = 0.1497                       |
| R Indices (All Data)              | R1 = 0.0899, wR2 = 0.1651                       |
| Largest Diff. Peak and Hole       | 0.558 and -0.530 e <sup>-</sup> /Å <sup>3</sup> |

## Compound 6aa

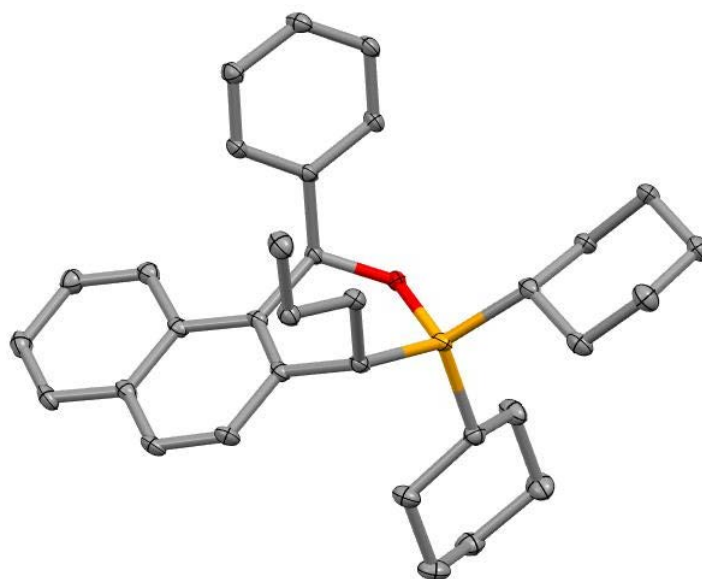

A colorless  $\text{CH}_2\text{Cl}_2$  solution of compound **6aa** was prepared. Crystals suitable for X-ray analysis were obtained by layering MeOH and slow diffusion of the solvents at room temperature. The crystal structure has been deposited at the Cambridge Crystallographic Data Centre (deposition number: CCDC 2237531). The data can be obtained free of charge via the Internet at <https://www.ccdc.cam.ac.uk/structures/>.

### Crystal Data and Structure Refinement.

|                      |                                                                |                                                                                         |
|----------------------|----------------------------------------------------------------|-----------------------------------------------------------------------------------------|
| Empirical Formula    | $\text{C}_{33}\text{H}_{42}\text{OSi}$                         |                                                                                         |
| Formula Weight       | 482.75                                                         |                                                                                         |
| Temperature          | 113.15 K                                                       |                                                                                         |
| Wavelength           | 0.71073 Å                                                      |                                                                                         |
| Crystal System       | Triclinic                                                      |                                                                                         |
| Space Group          | P-1                                                            |                                                                                         |
| Unit Cell Dimensions | $a = 10.3545(2)$ Å<br>$b = 12.0752(2)$ Å<br>$c = 12.5616(3)$ Å | $\alpha = 68.423(2)^\circ$<br>$\beta = 70.324(2)^\circ$<br>$\gamma = 89.9840(10)^\circ$ |
| Volume               | $1361.51(5)$ Å <sup>3</sup>                                    |                                                                                         |

|                                   |                                                 |
|-----------------------------------|-------------------------------------------------|
| Z Value                           | 2                                               |
| Calculated Density                | 1.178 g/cm <sup>3</sup>                         |
| Absorption coefficient            | 0.110 mm <sup>-1</sup>                          |
| F(000)                            | 524                                             |
| Crystal size                      | 0.190 x 0.160 x 0.160 mm                        |
| Theta Range for Data Collection   | 2.583–29.518°                                   |
| Index Ranges                      | -14 ≤ h ≤ 14, -16 ≤ k ≤ 14, -16 ≤ l ≤ 17        |
| Reflections Collected             | 25360                                           |
| Independent Reflections           | 6676 [R(int) = 0.0985]                          |
| Completeness to Theta = 25.242°   | 97.6%                                           |
| Absorption Correction             | Semi-empirical from equivalents                 |
| Max. and Min. Transmission        | 1.00000 and 0.52786                             |
| Refinement Method                 | Full-matrix least-squares on F <sup>2</sup>     |
| Data / Restraints / Parameters    | 6676 / 625 / 481                                |
| Goodness-of-Fit on F <sup>2</sup> | 1.010                                           |
| Final R Indices [I > 2sigma(I)]   | R1 = 0.0497, wR2 = 0.1231                       |
| R Indices (All Data)              | R1 = 0.0686, wR2 = 0.1258                       |
| Largest Diff. Peak and Hole       | 0.398 and -0.388 e <sup>-</sup> /Å <sup>3</sup> |

## Compound 6ia

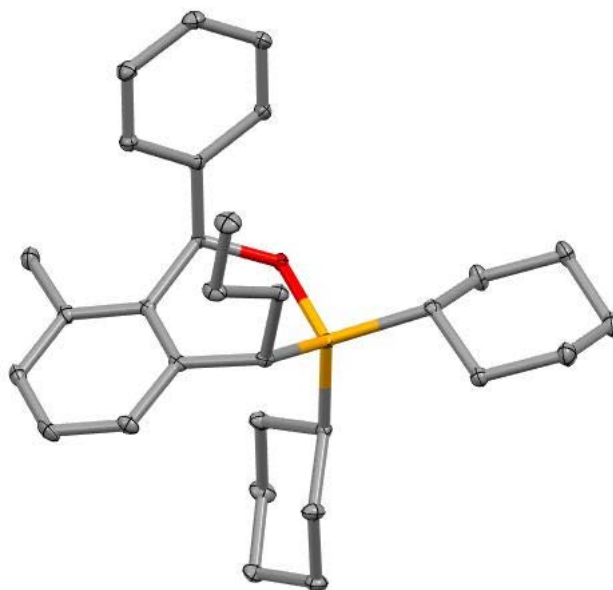

A colorless  $\text{CH}_2\text{Cl}_2$  solution of compound **6ia** was prepared. Crystals suitable for X-ray analysis were obtained by layering MeOH and slow diffusion of the solvents at room temperature. The crystal structure has been deposited at the Cambridge Crystallographic Data Centre (deposition number: CCDC 2237532). The data can be obtained free of charge via the Internet at <https://www.ccdc.cam.ac.uk/structures/>.

### Crystal Data and Structure Refinement.

|                      |                                        |                            |
|----------------------|----------------------------------------|----------------------------|
| Empirical Formula    | $\text{C}_{30}\text{H}_{42}\text{OSi}$ |                            |
| Formula Weight       | 446.72                                 |                            |
| Temperature          | $113 \pm 2$ K                          |                            |
| Wavelength           | 0.71075 Å                              |                            |
| Crystal System       | Triclinic                              |                            |
| Space Group          | P-1                                    |                            |
| Unit Cell Dimensions | $a = 9.9322(13)$ Å                     | $\alpha = 72.762(7)^\circ$ |
|                      | $b = 10.0147(10)$ Å                    | $\beta = 87.903(8)^\circ$  |
|                      | $c = 13.5979(14)$ Å                    | $\gamma = 82.672(3)^\circ$ |

|                                   |                                                 |
|-----------------------------------|-------------------------------------------------|
| Volume                            | 1281.2(3) Å <sup>3</sup>                        |
| Z Value                           | 2                                               |
| Calculated Density                | 1.158 g/cm <sup>3</sup>                         |
| Absorption coefficient            | 0.111 mm <sup>-1</sup>                          |
| F(000)                            | 488                                             |
| Crystal size                      | 0.300 x 0.300 x 0.100 mm                        |
| Theta Range for Data Collection   | 3.1–27.5°                                       |
| Index Ranges                      | -12 ≤ h ≤ 12, -12 ≤ k ≤ 12, -17 ≤ l ≤ 17        |
| Reflections Collected             | 23983                                           |
| Independent Reflections           | 5819 [R(int) = 0.0360]                          |
| Completeness to Theta = 25.242°   | 99.7%                                           |
| Absorption Correction             | Semi-empirical from equivalents                 |
| Max. and Min. Transmission        | 1.000 and 0.922                                 |
| Refinement Method                 | Full-matrix least-squares on F <sup>2</sup>     |
| Data / Restraints / Parameters    | 5819 / 0 / 291                                  |
| Goodness-of-Fit on F <sup>2</sup> | 1.016                                           |
| Final R Indices [I > 2σ(I)]       | R1 = 0.0362, wR2 = 0.1174                       |
| R Indices (All Data)              | R1 = 0.0463, wR2 = 0.1260                       |
| Largest Diff. Peak and Hole       | 0.348 and -0.422 e <sup>-</sup> /Å <sup>3</sup> |



# V. <sup>1</sup>H and <sup>13</sup>C NMR Spectra

compound 1a

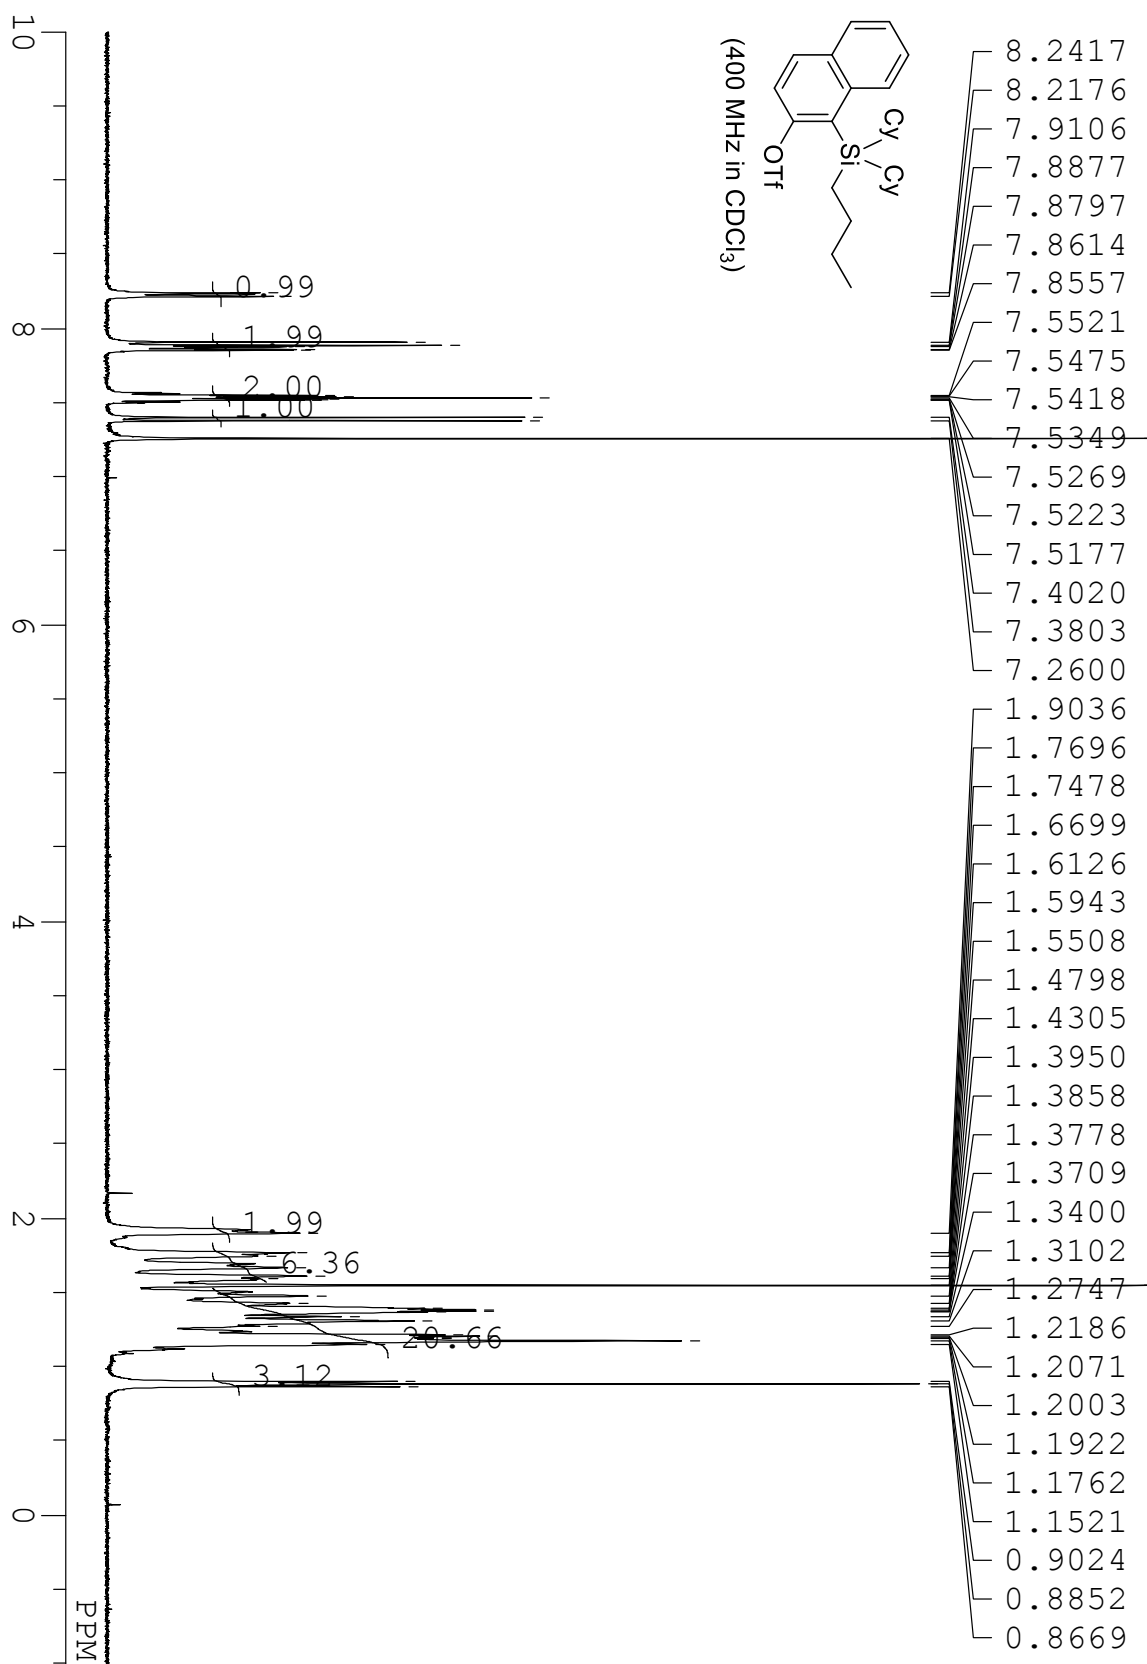

compound 1a

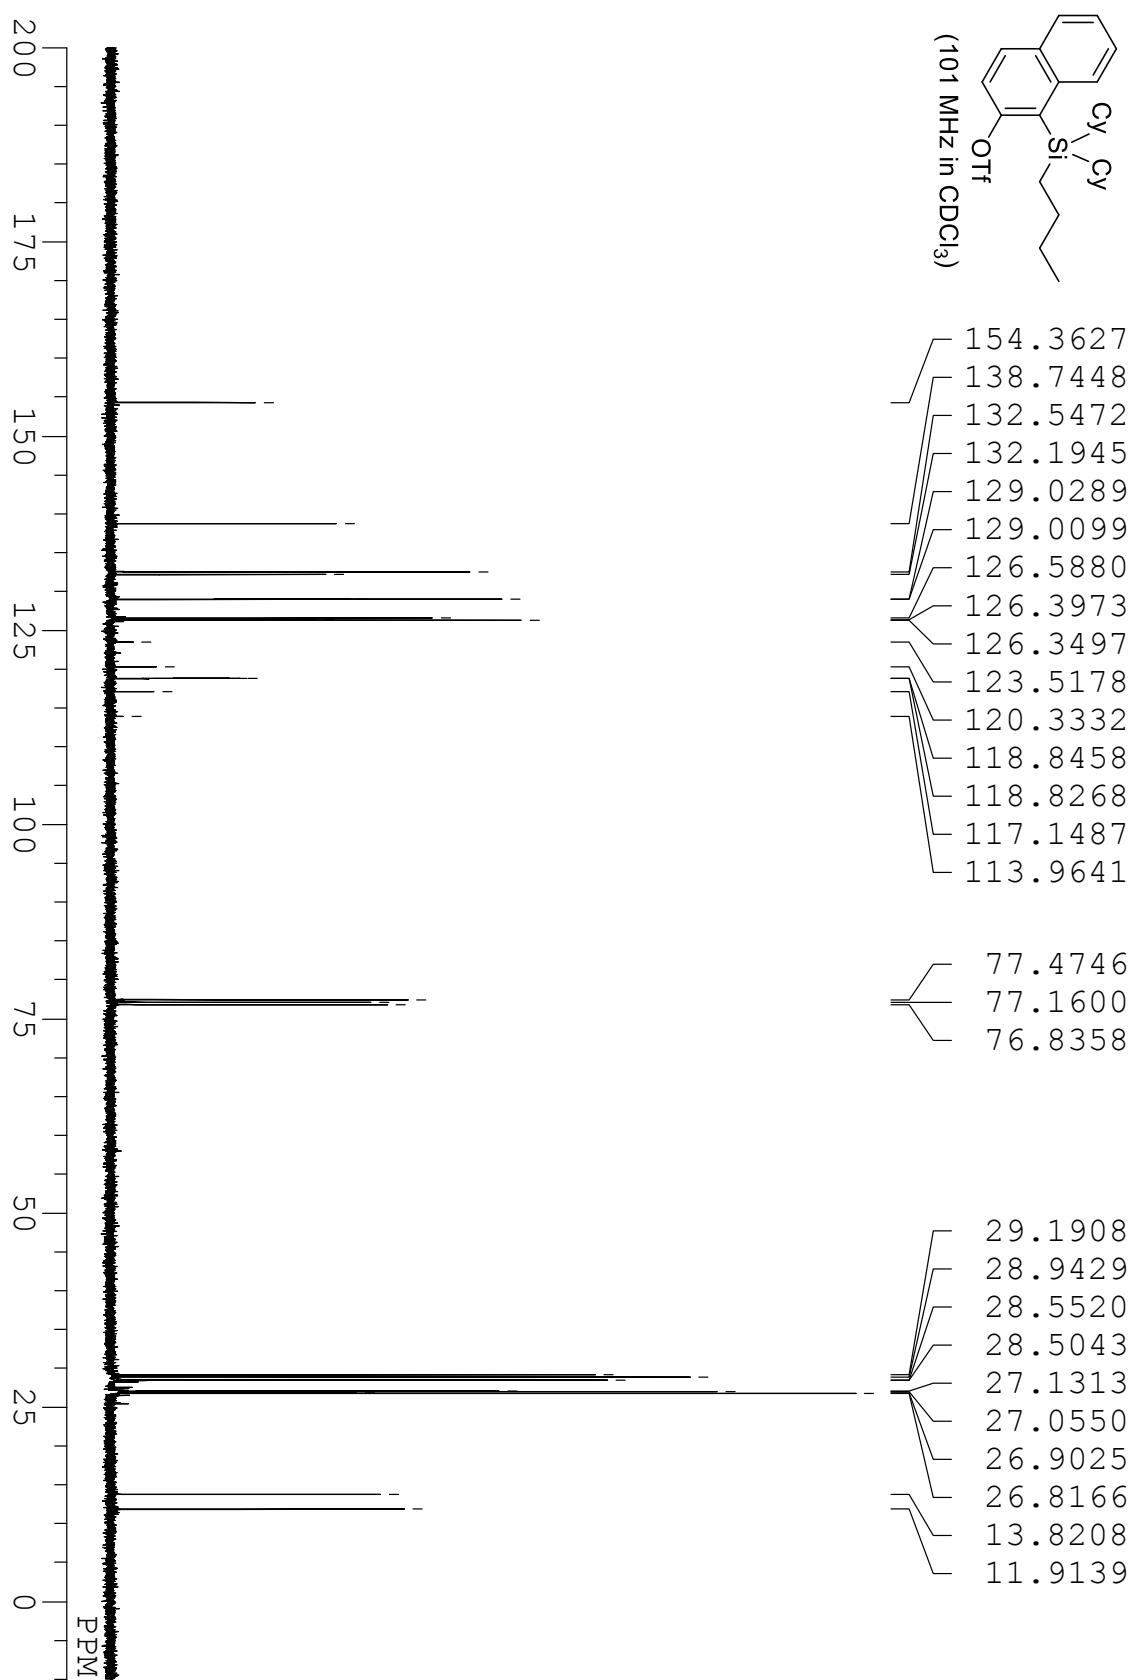

compound **1b**

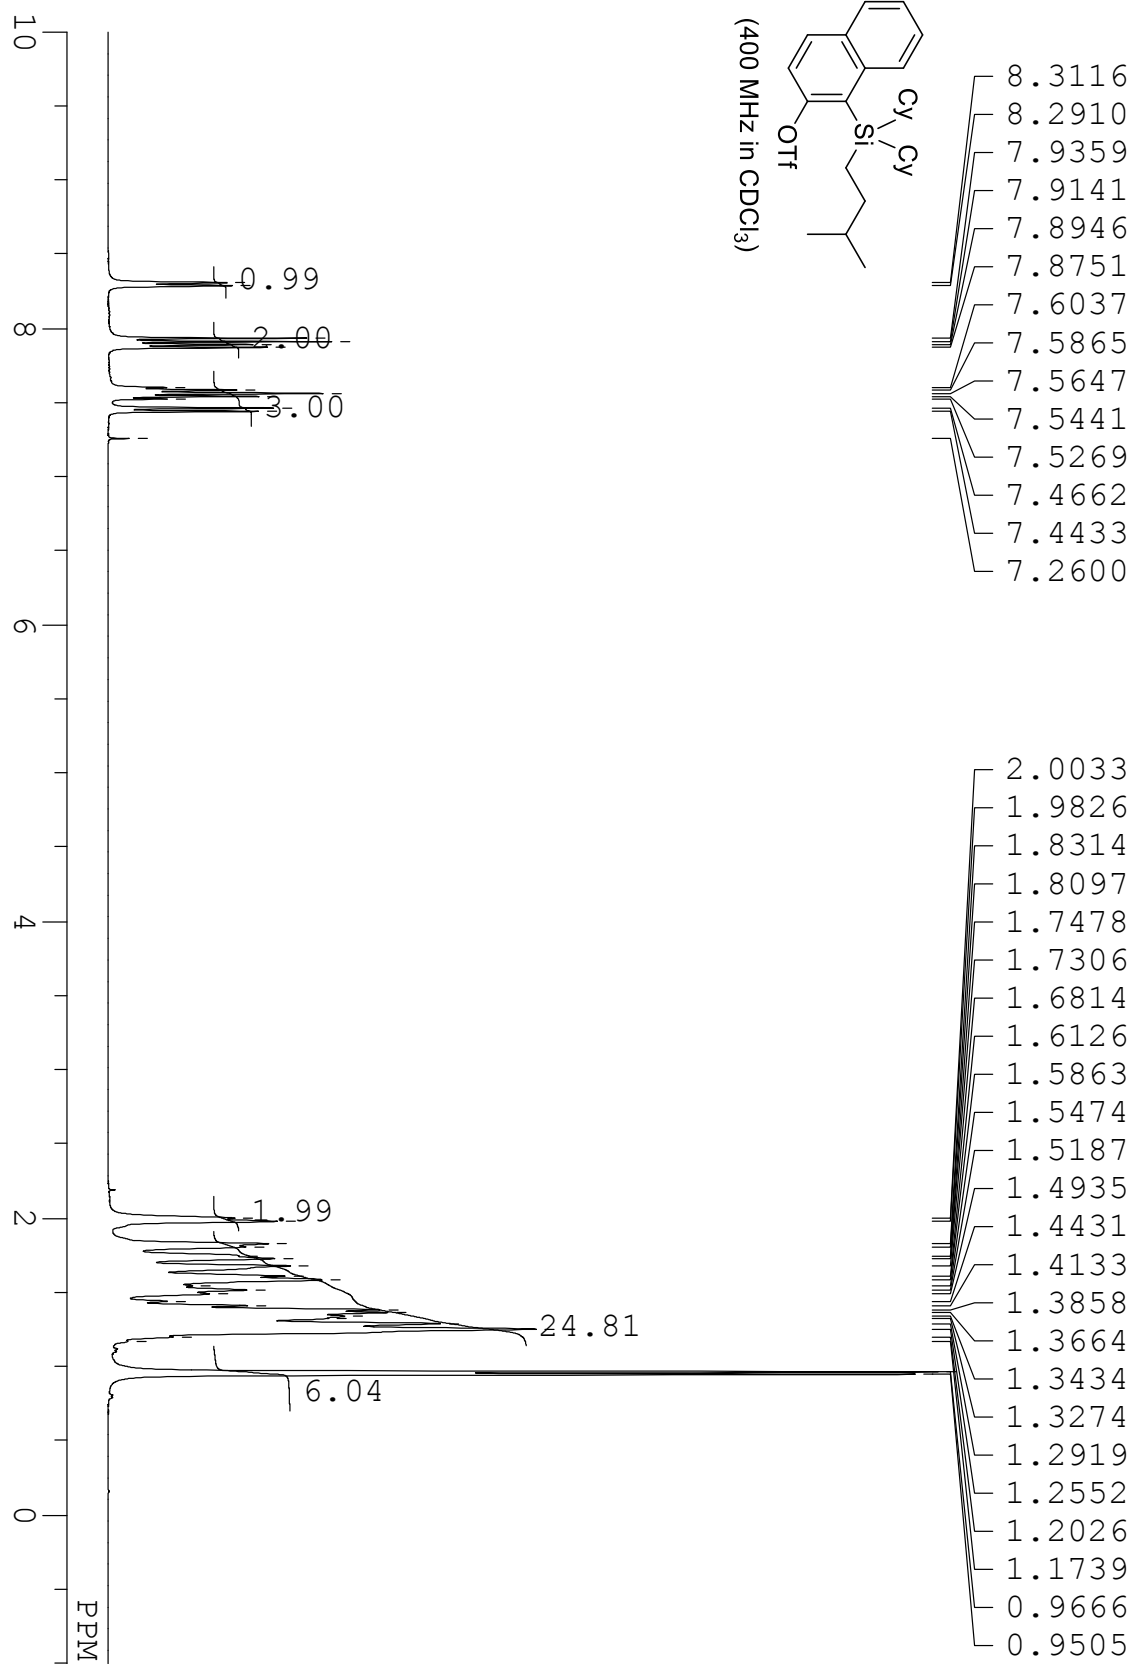

compound 1b

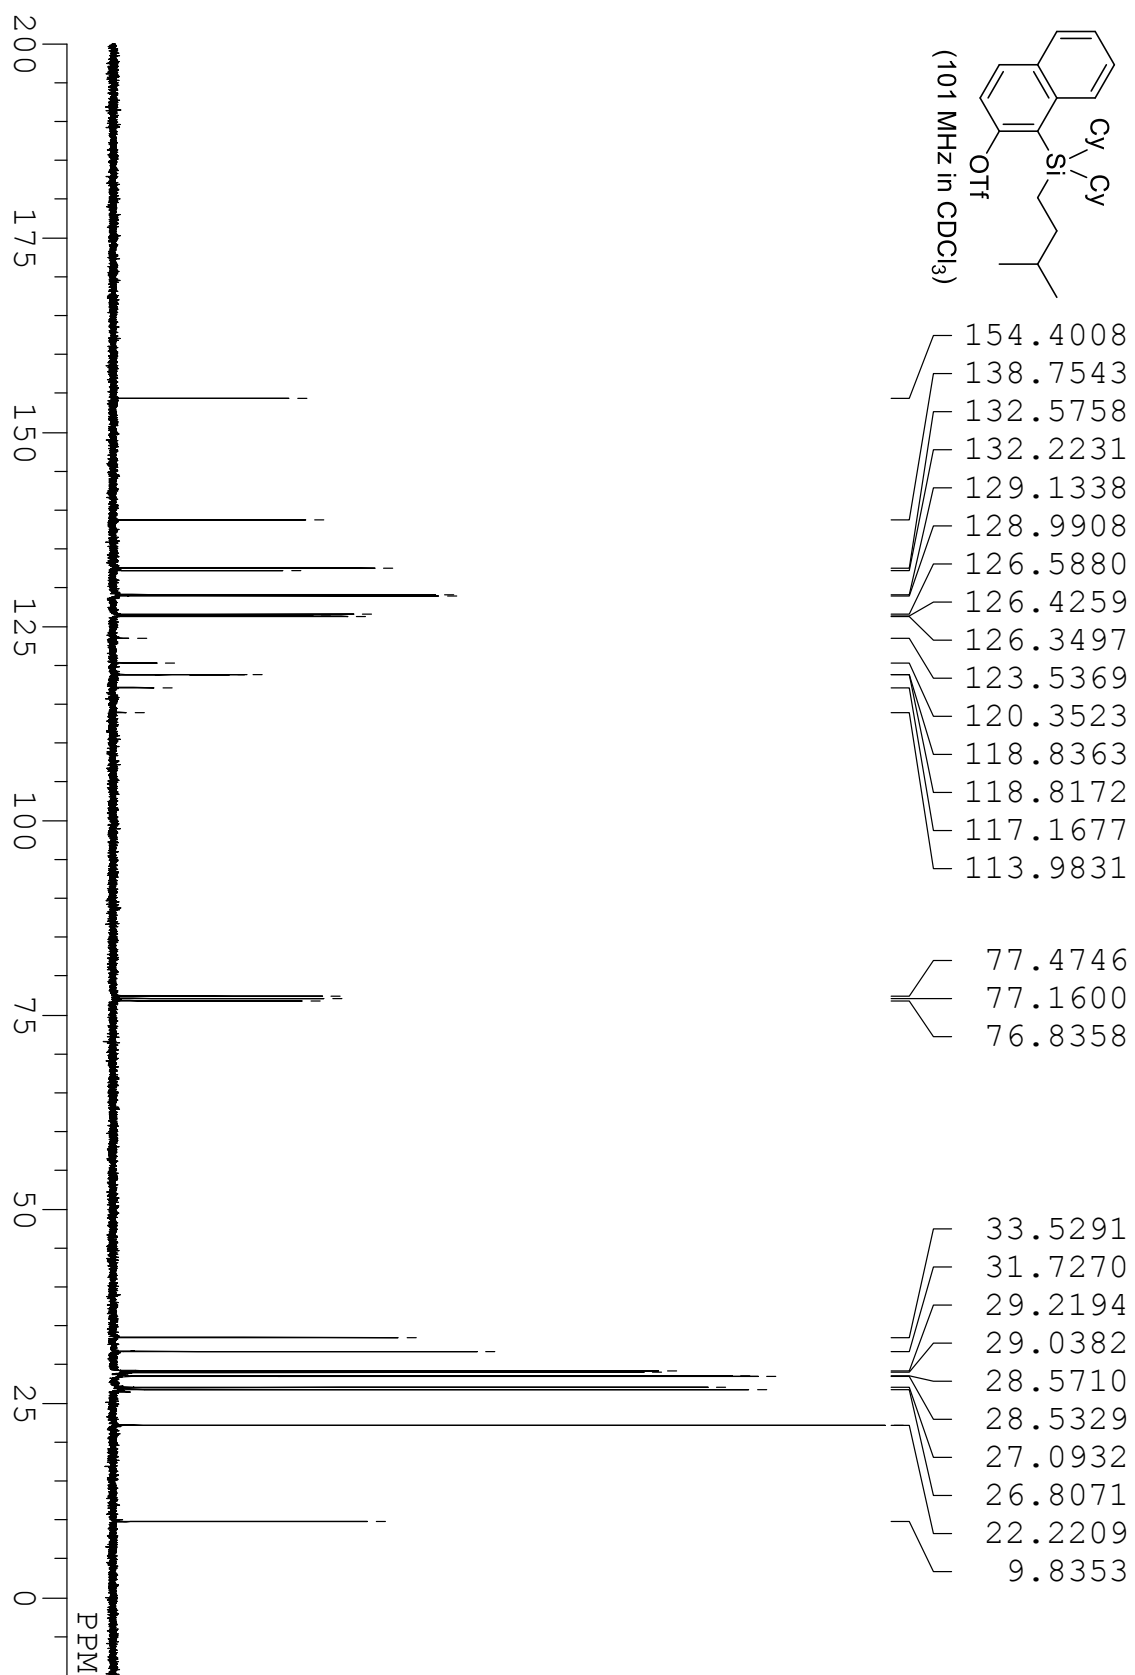

compound **1c**

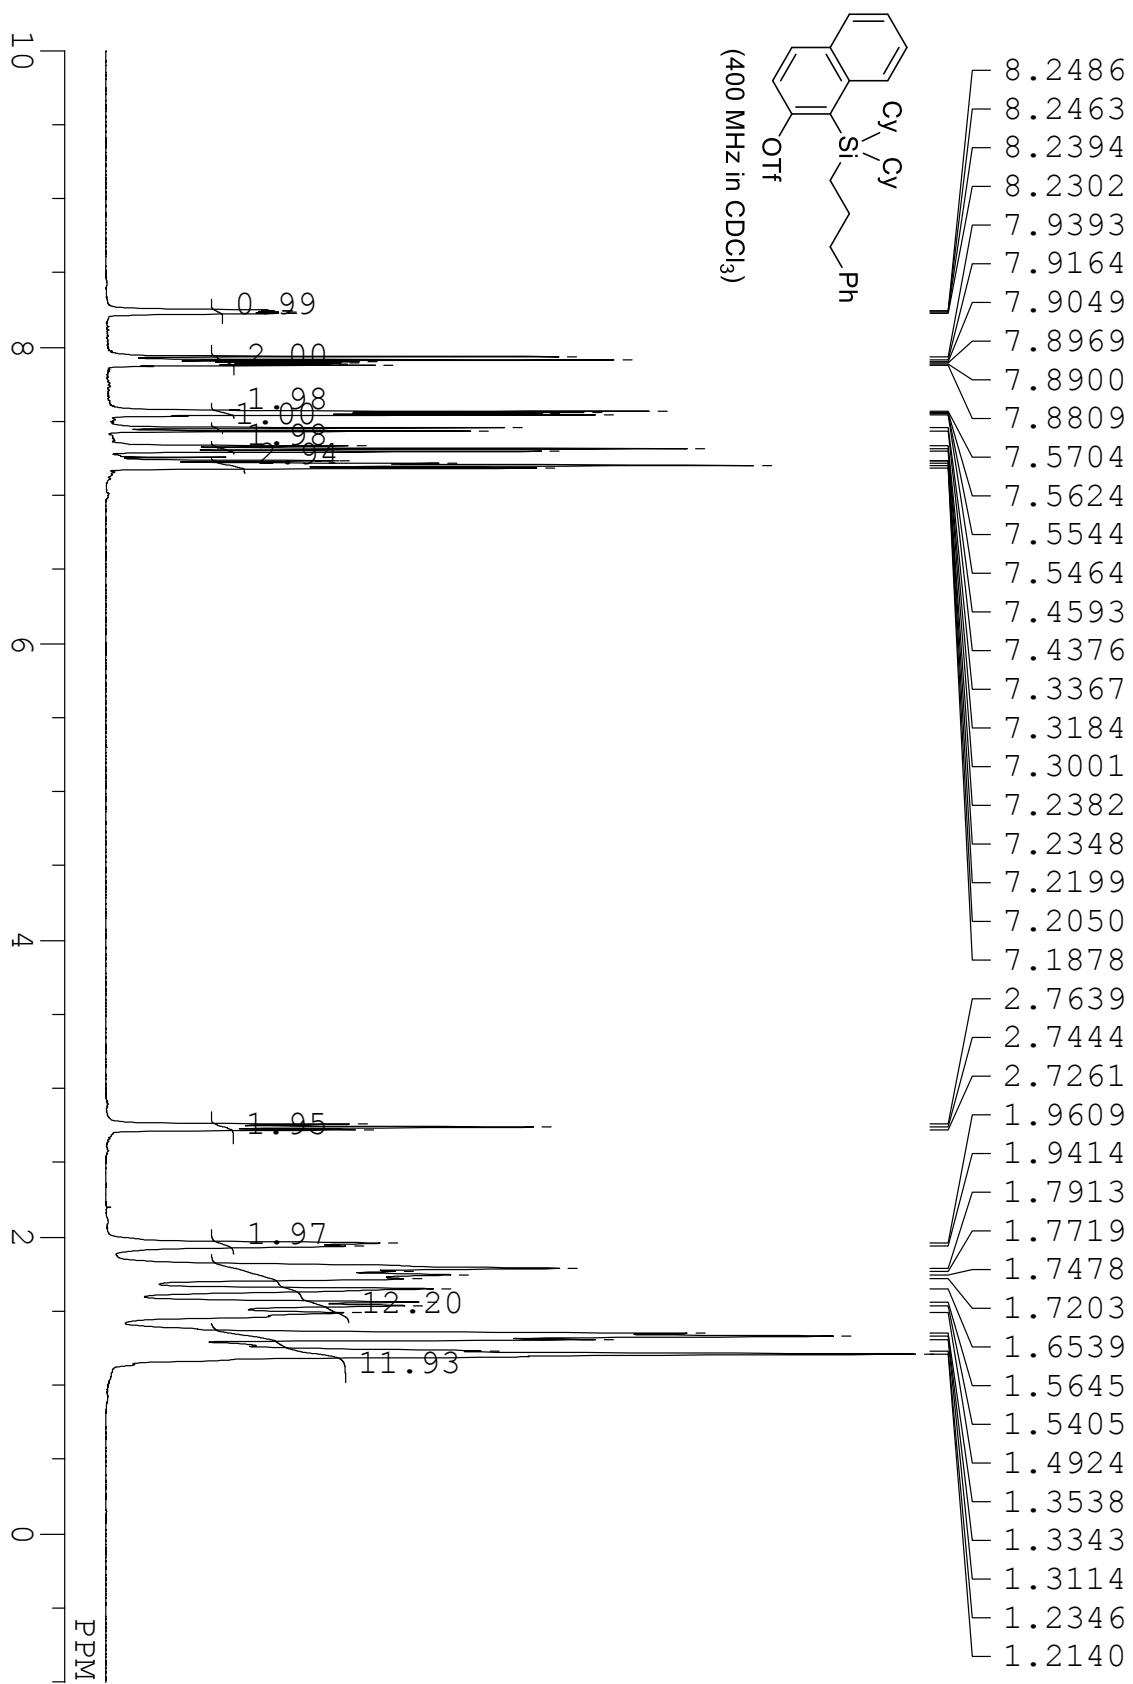

compound 1c

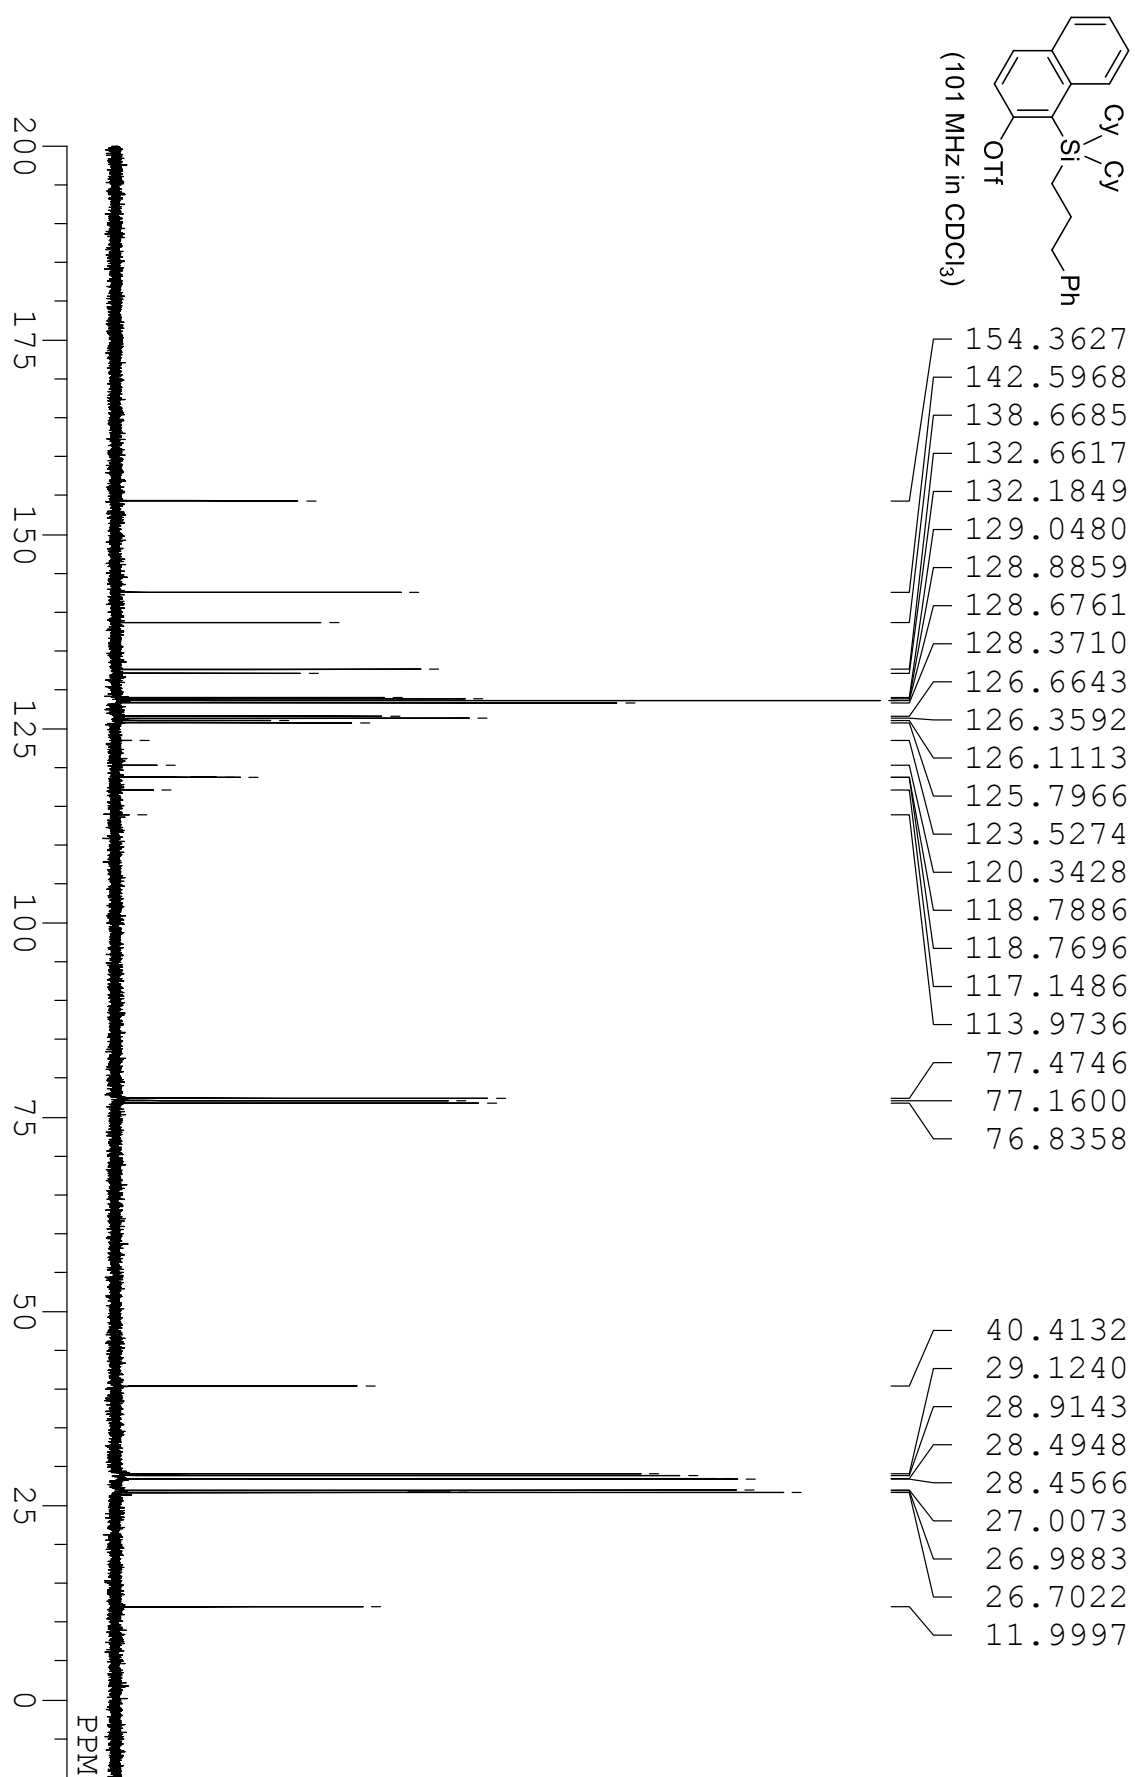

compound **1d**

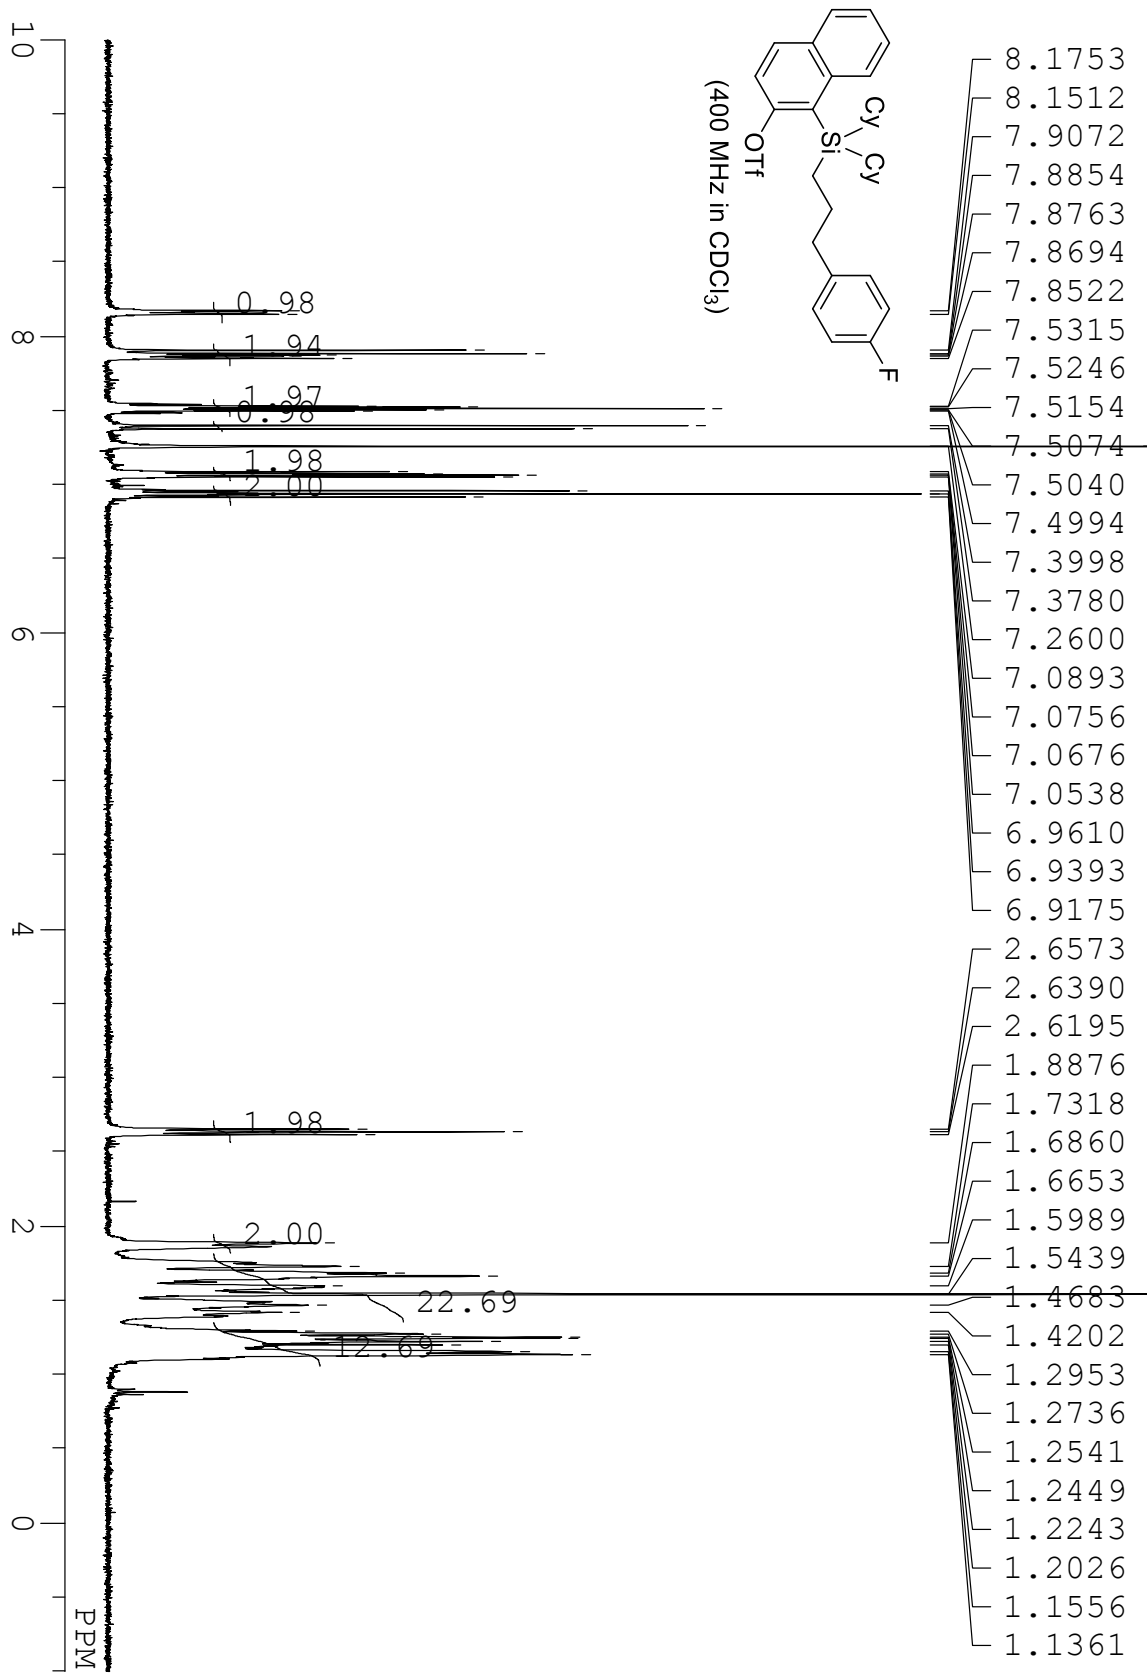

compound **1d**

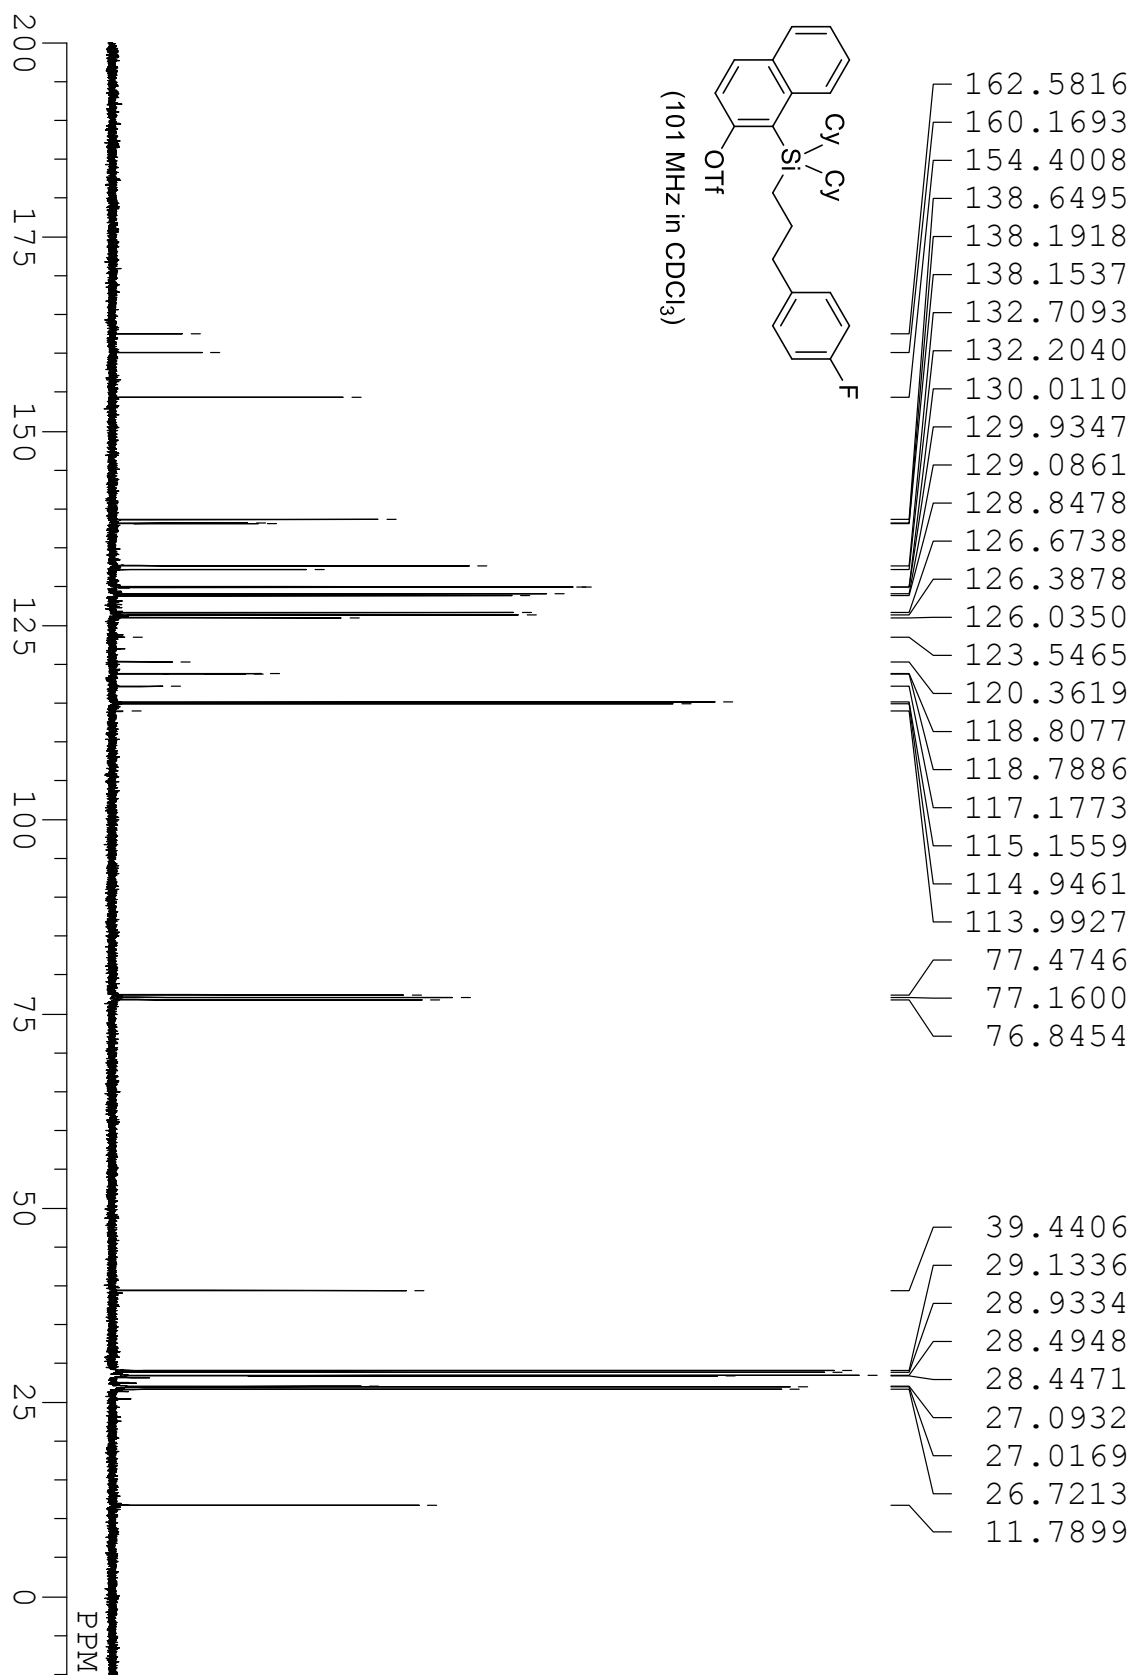



compound **1e**

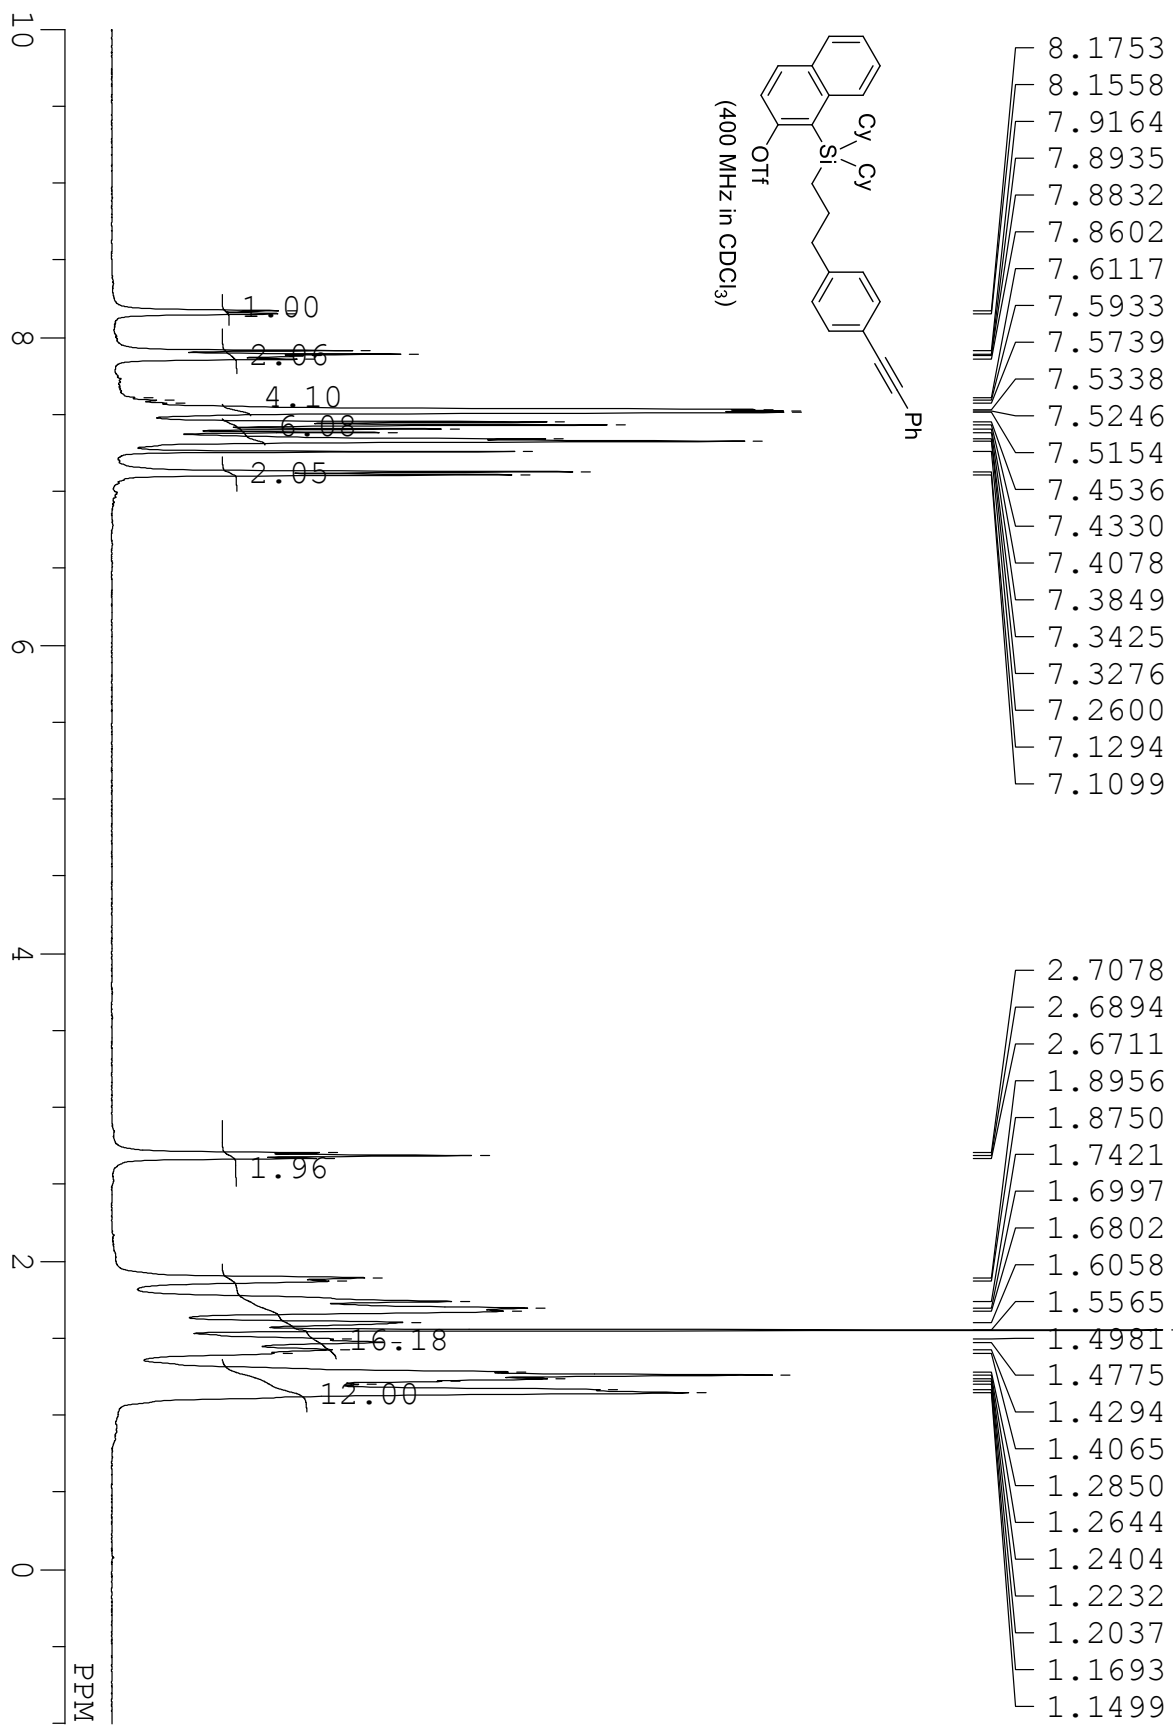

compound 1e

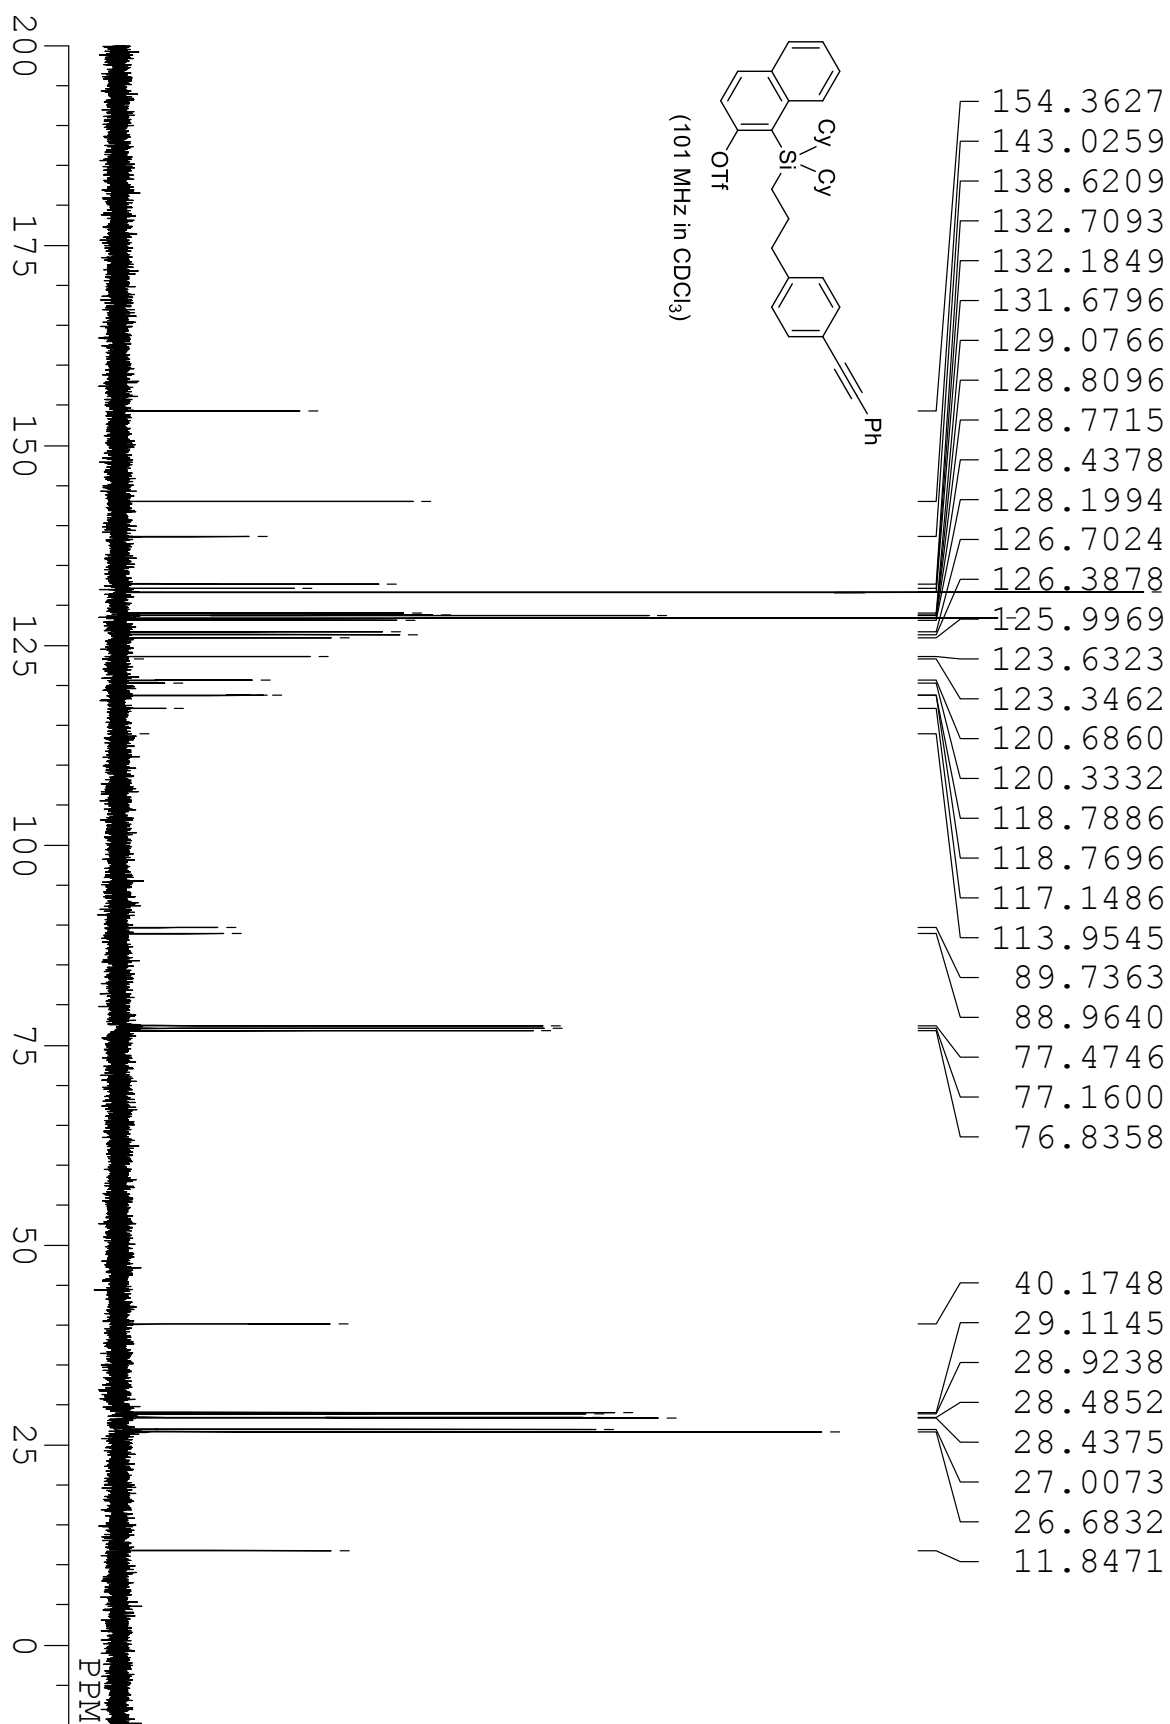

compound **1f**

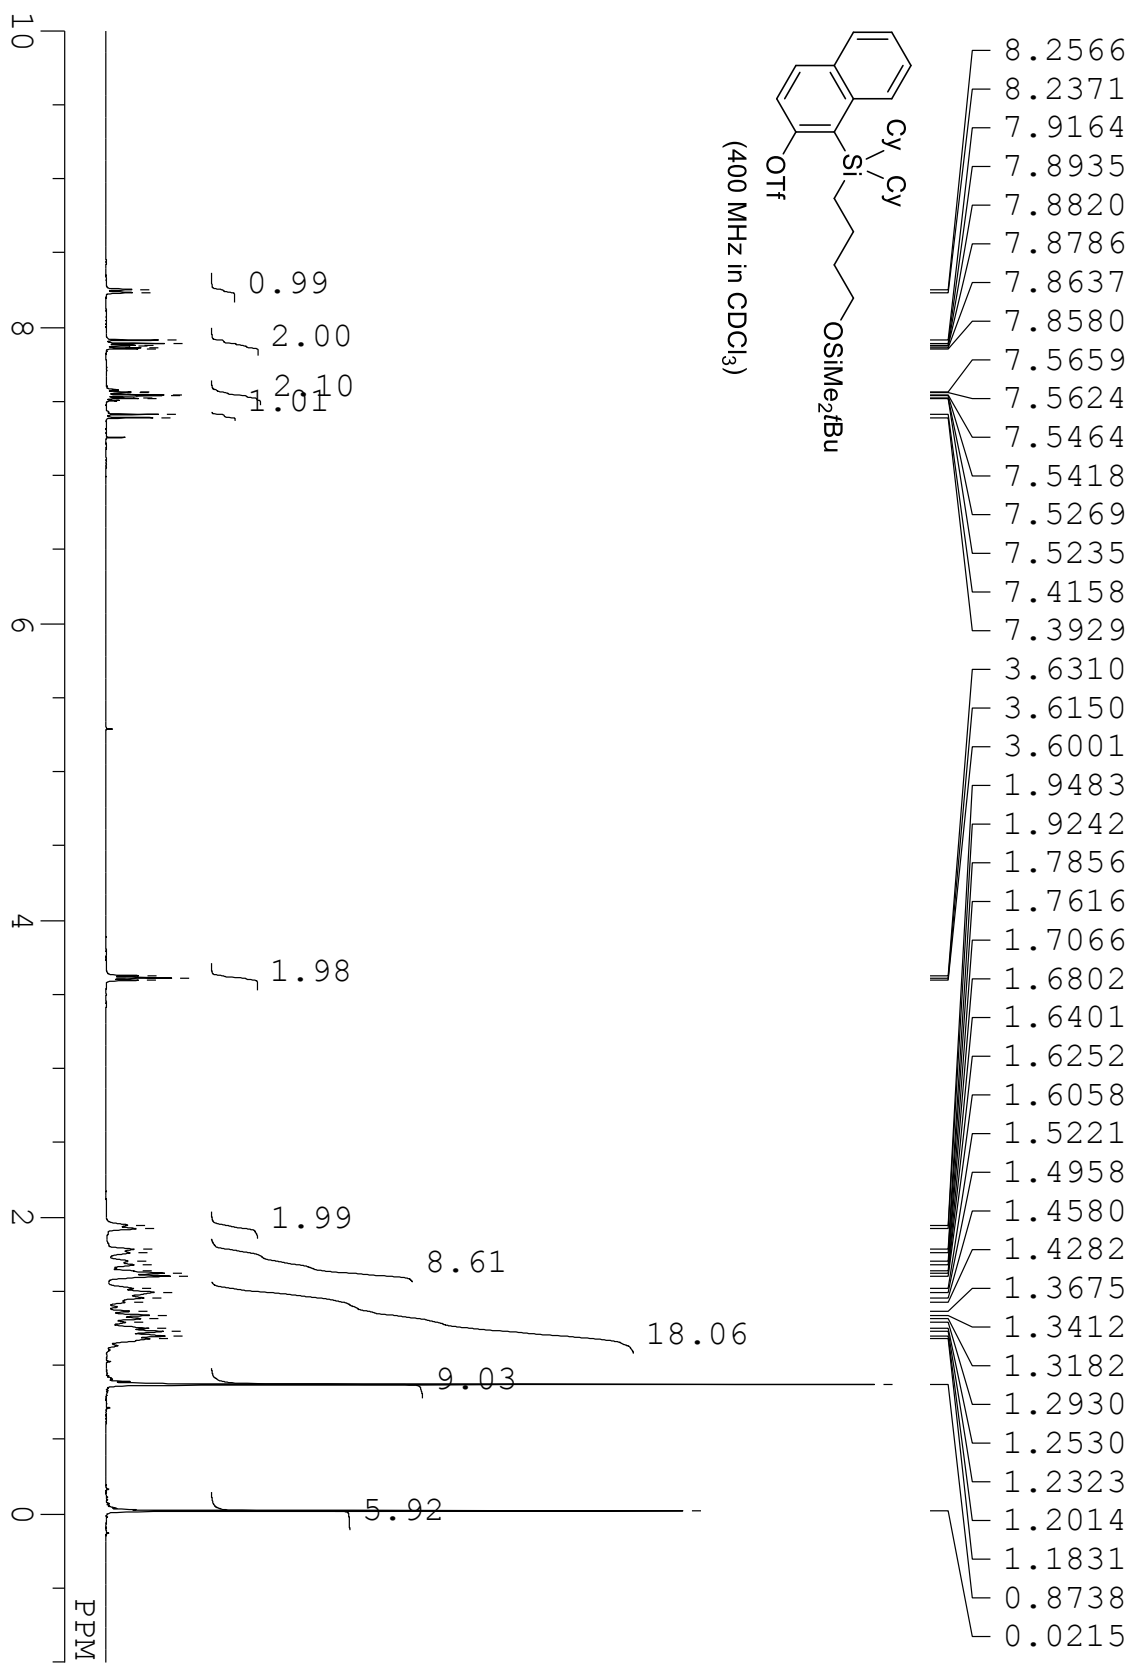

compound 1f

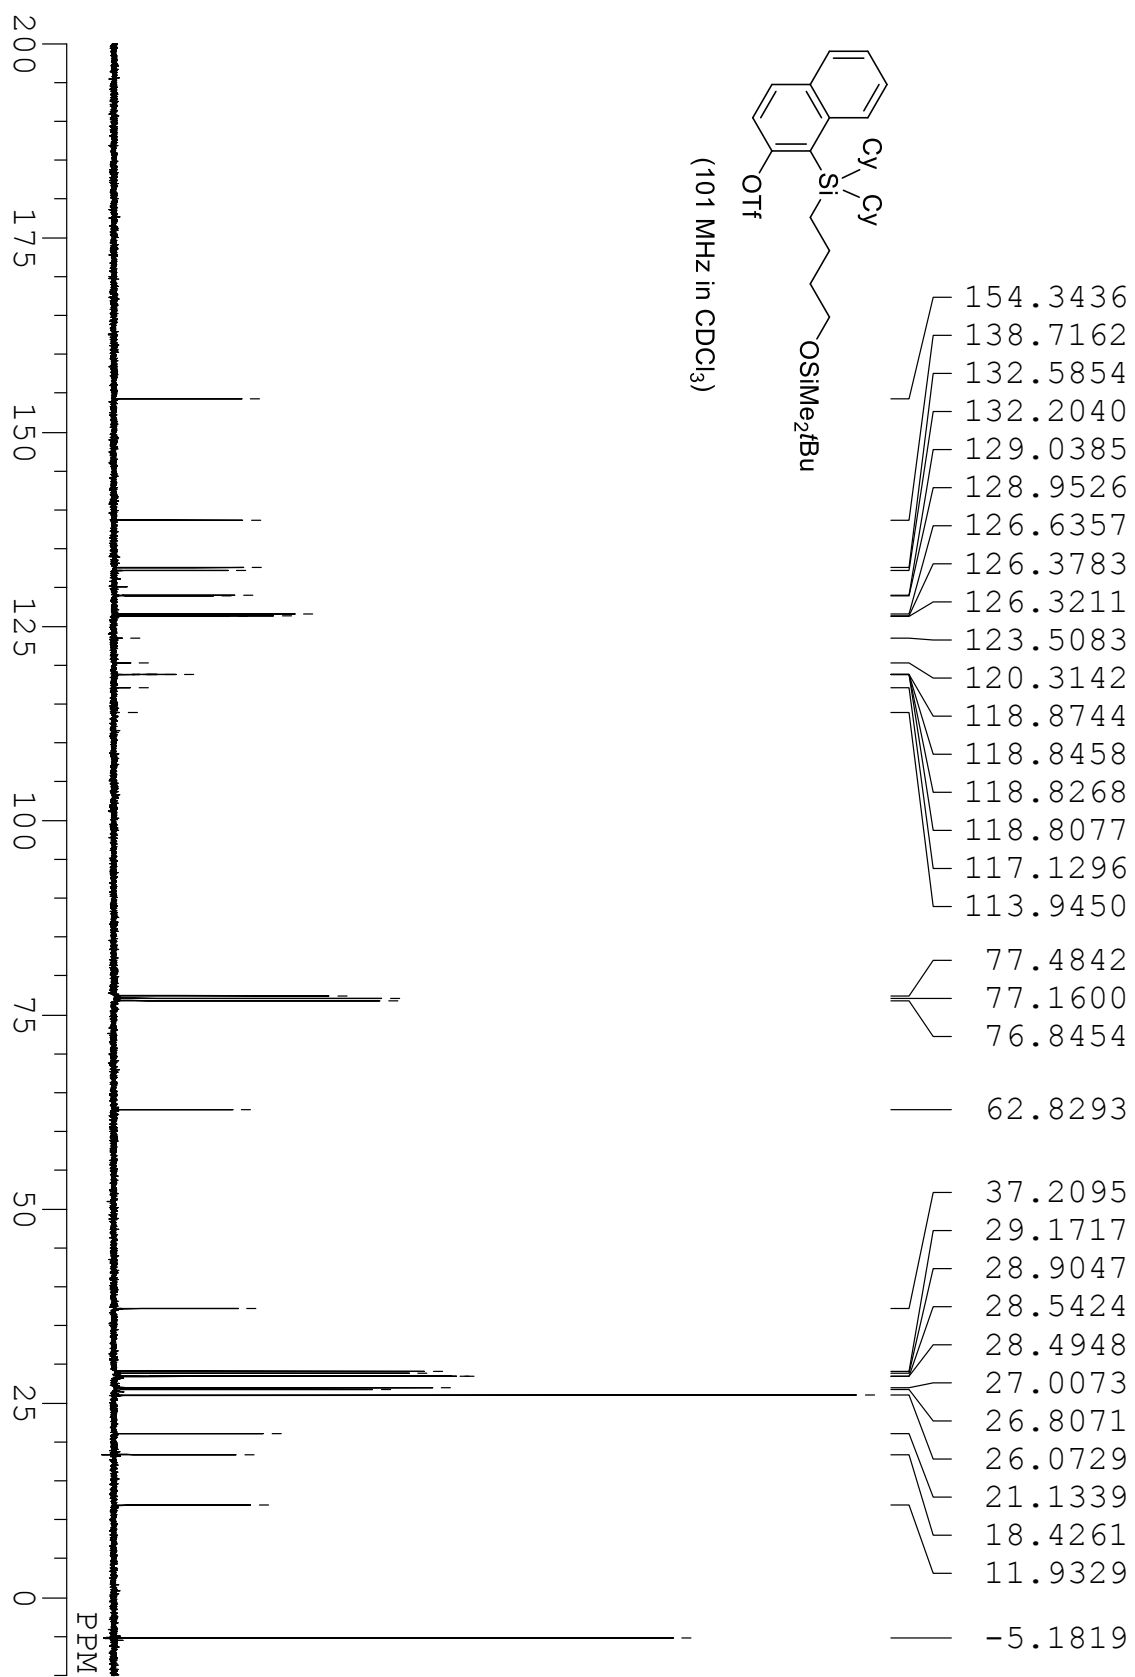

compound 1g

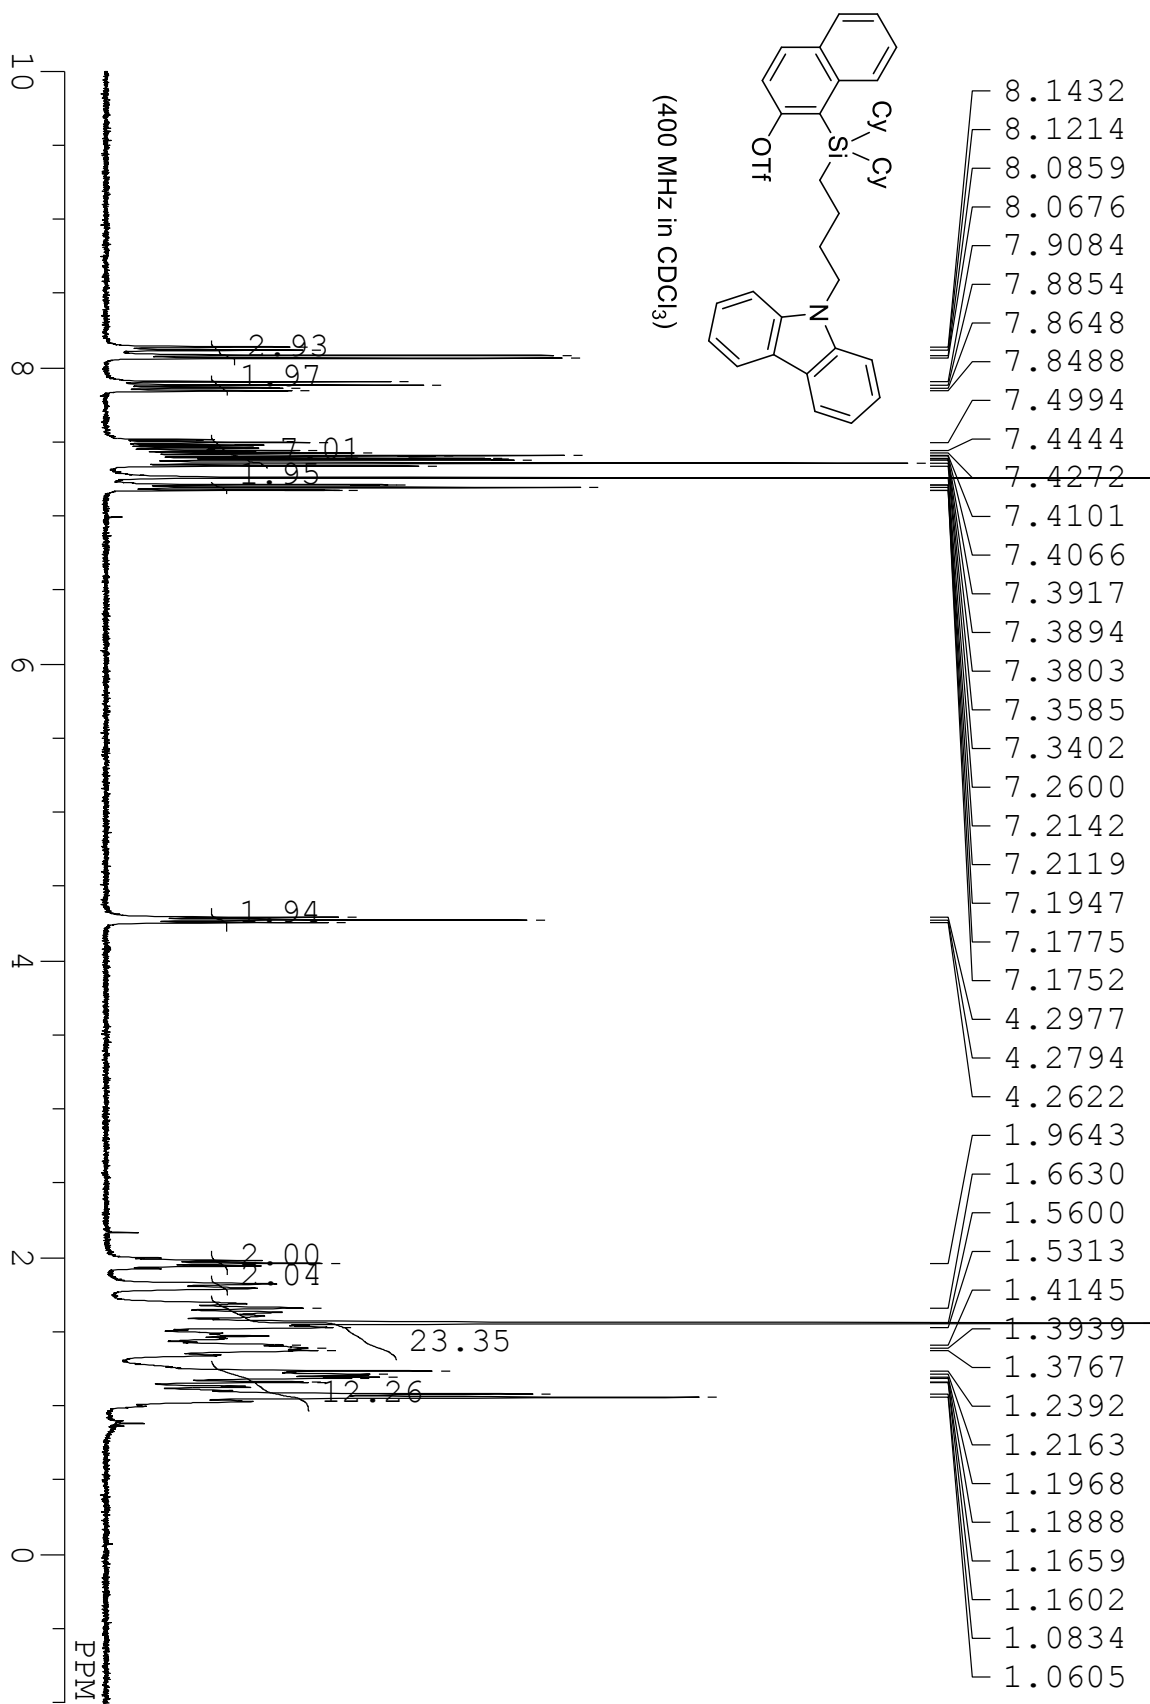

compound 1g

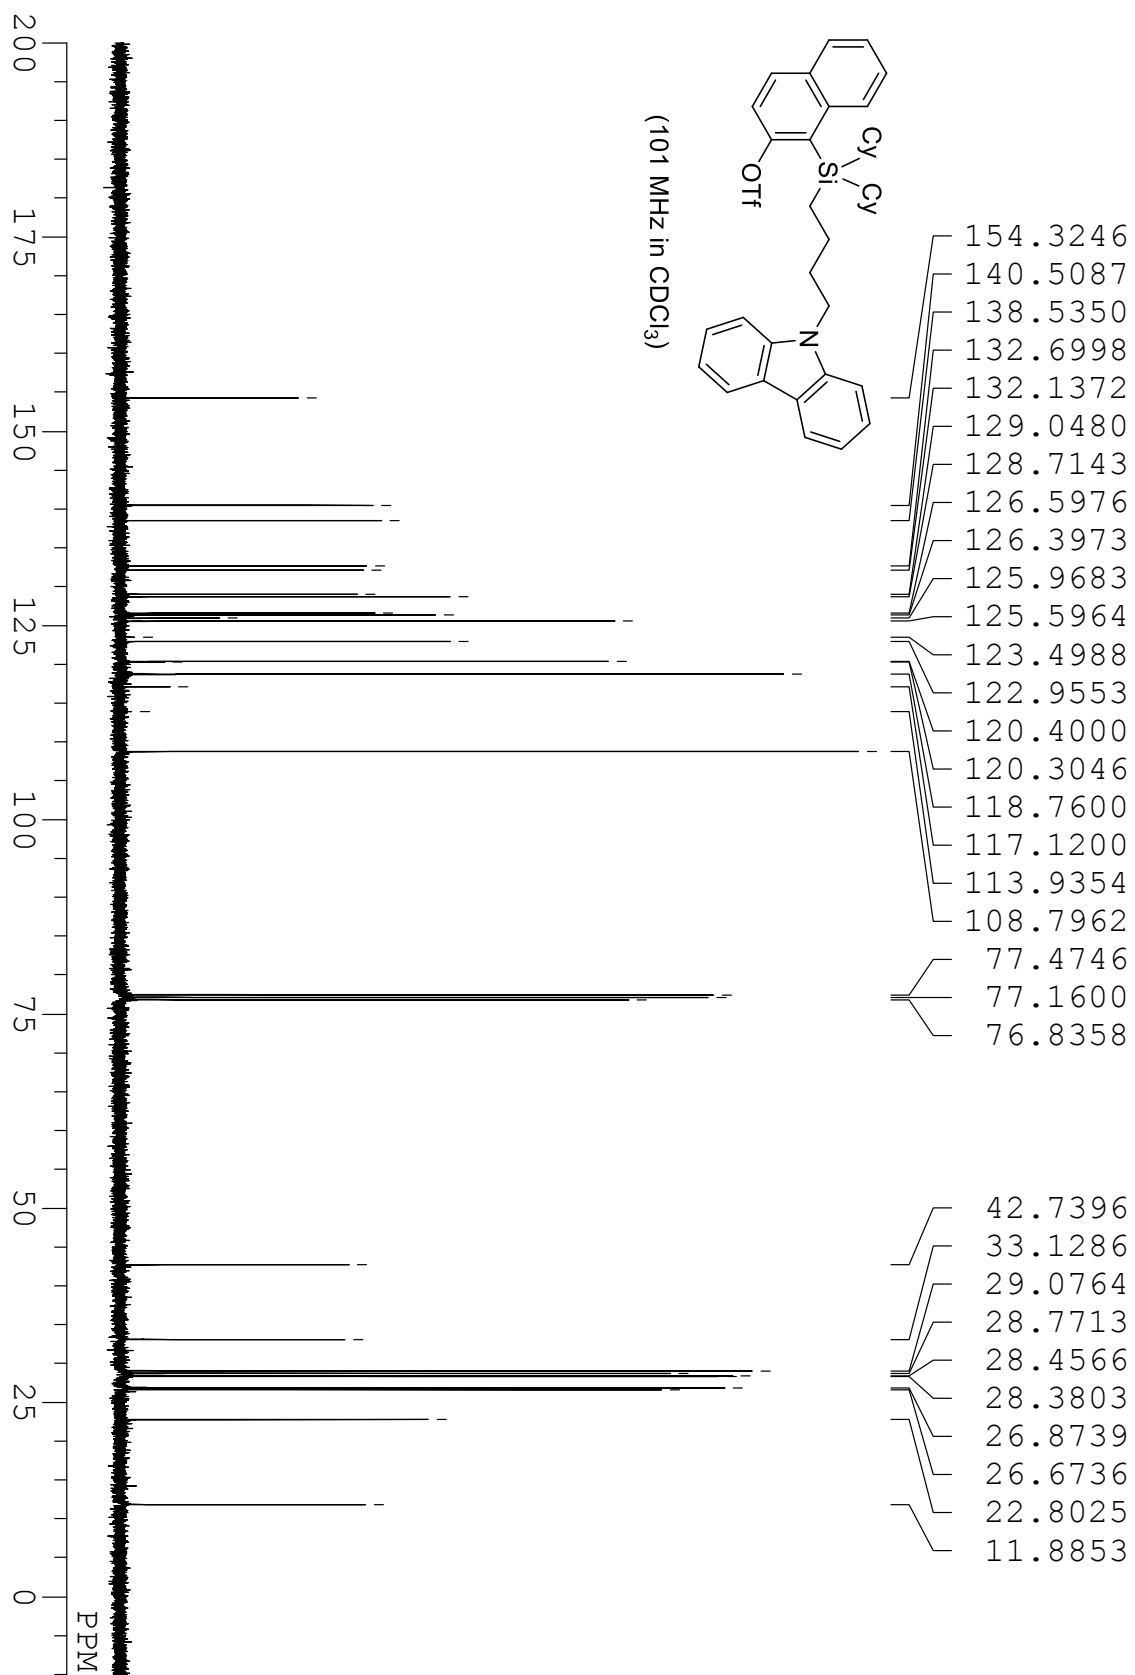

compound **1h**

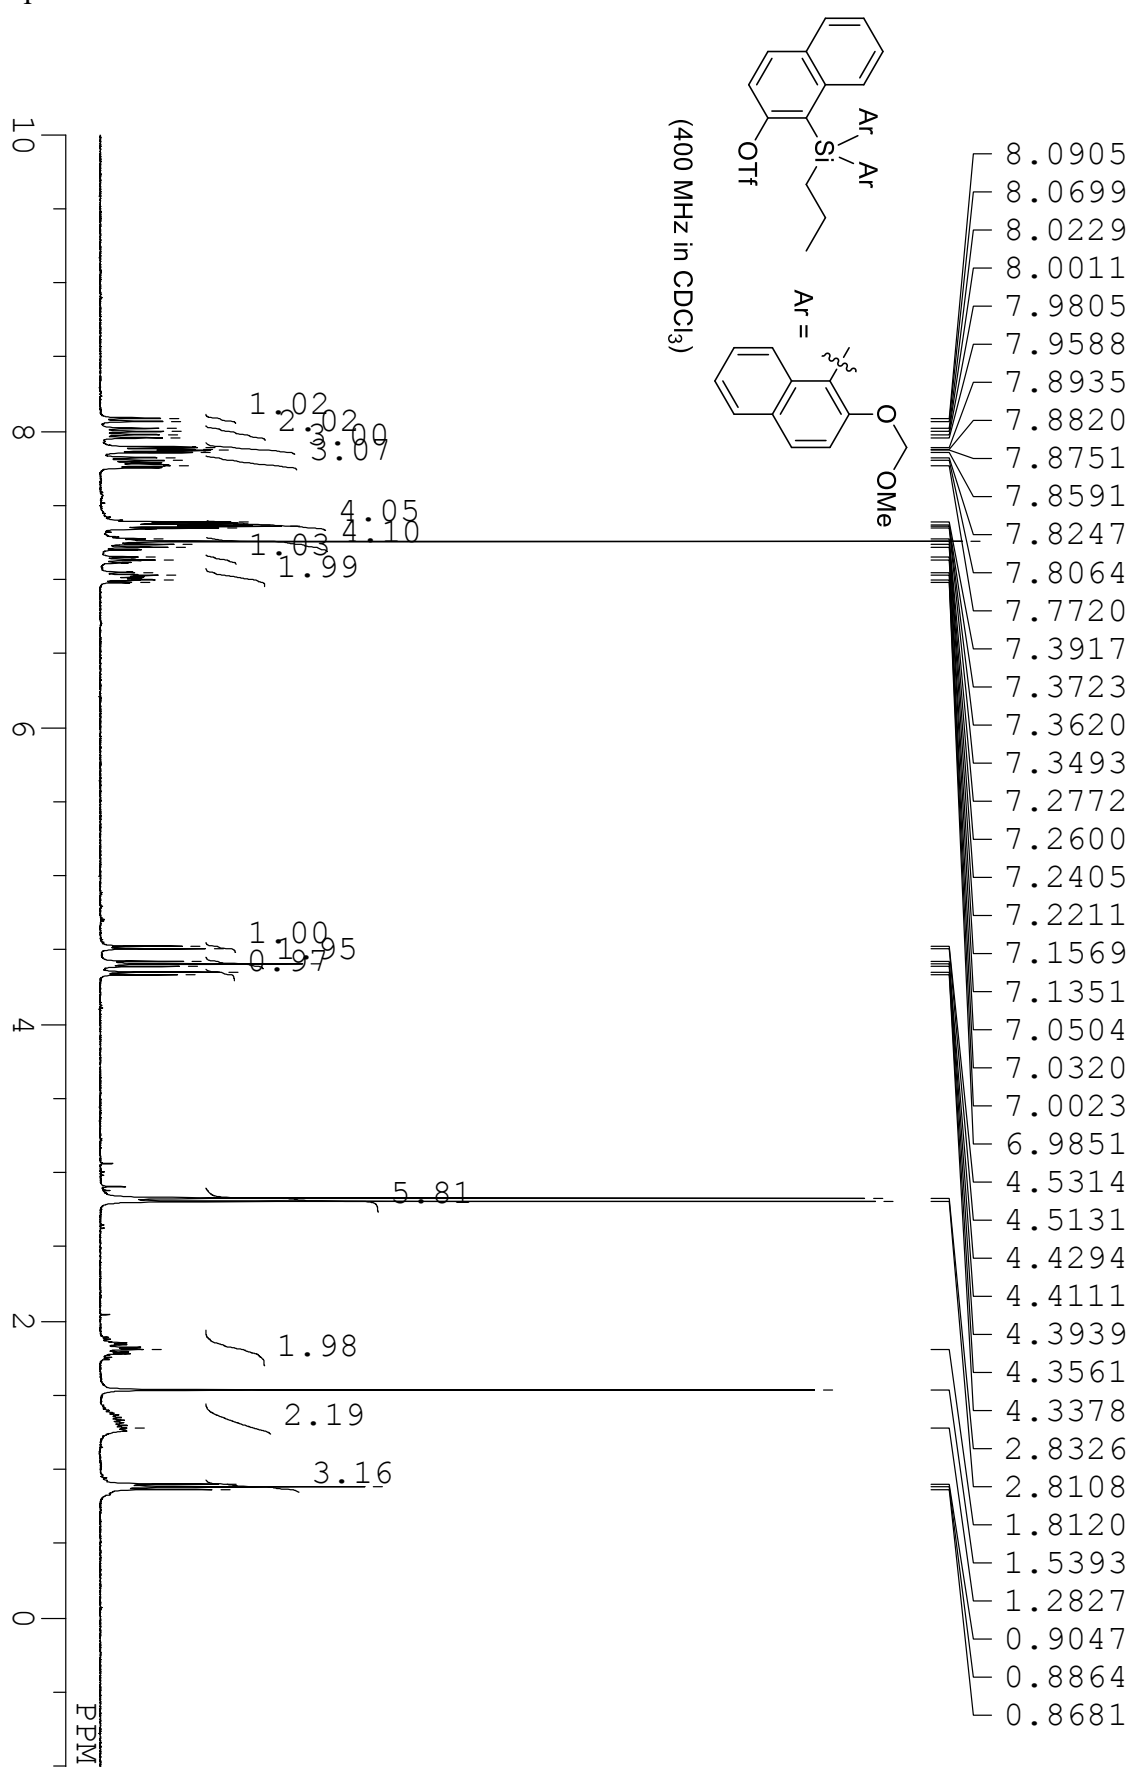

compound **1h**

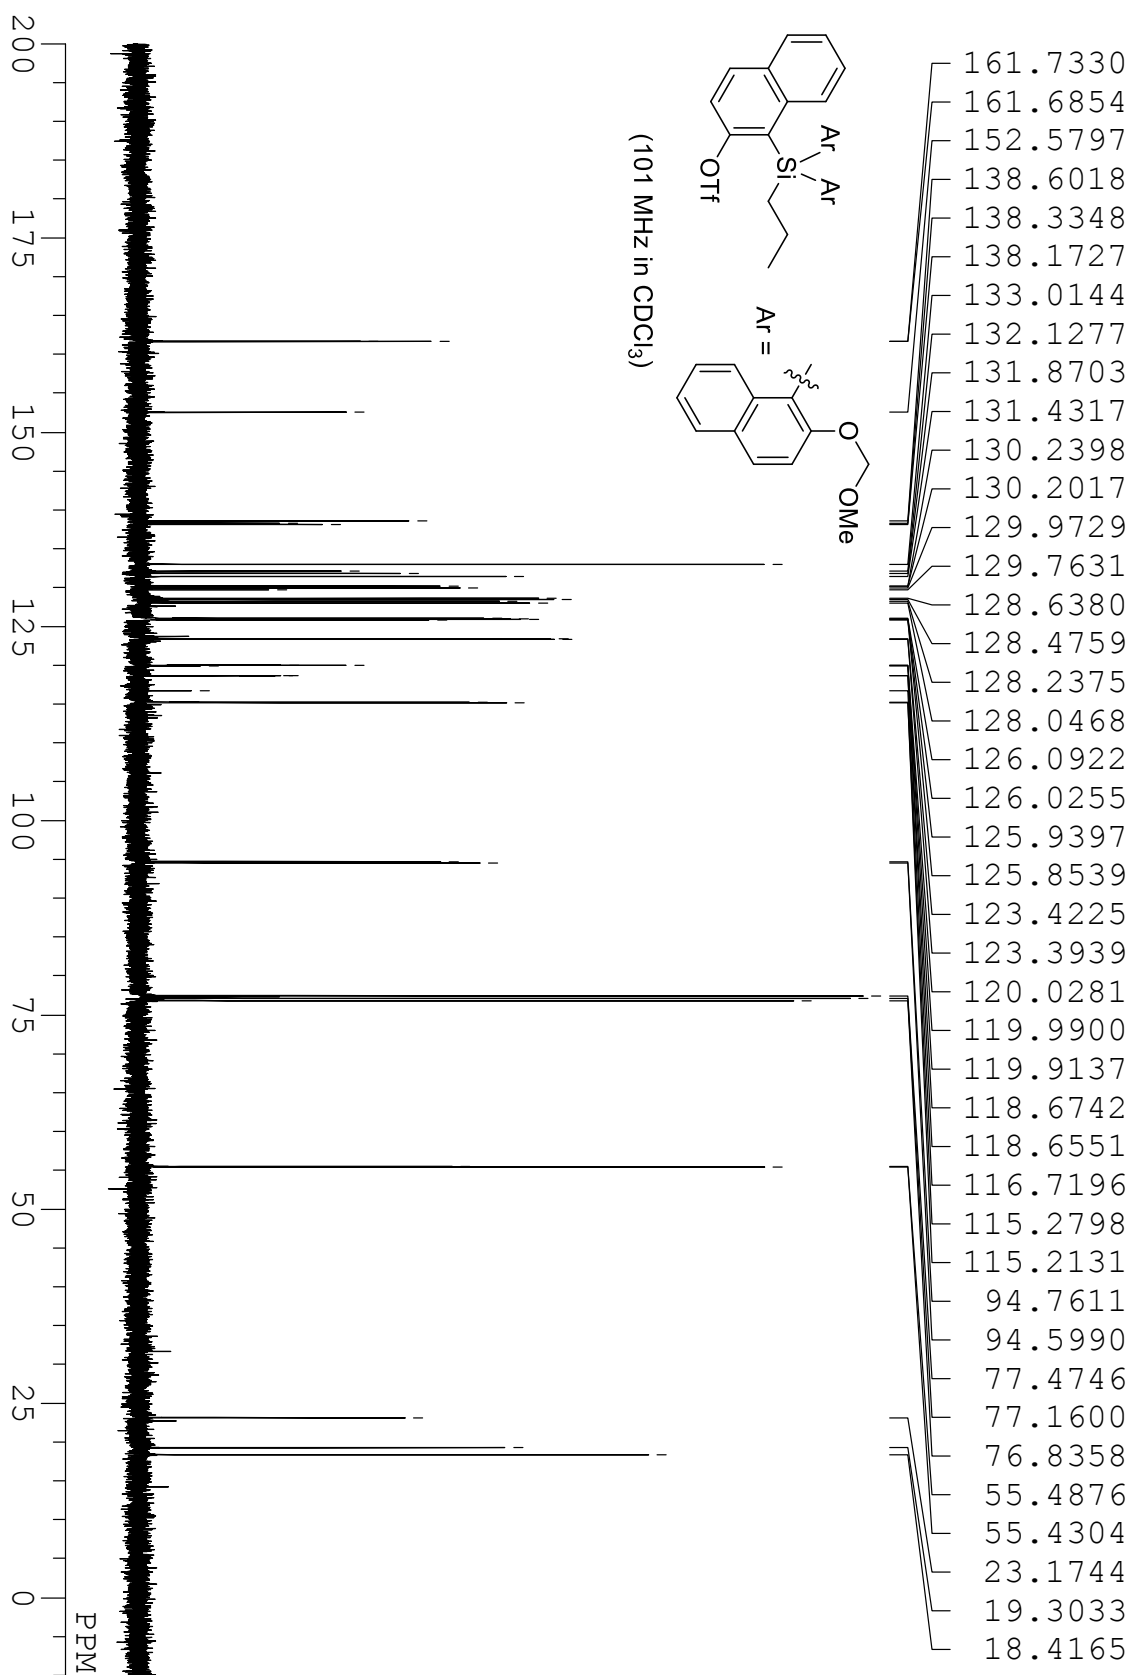



compound **1i**

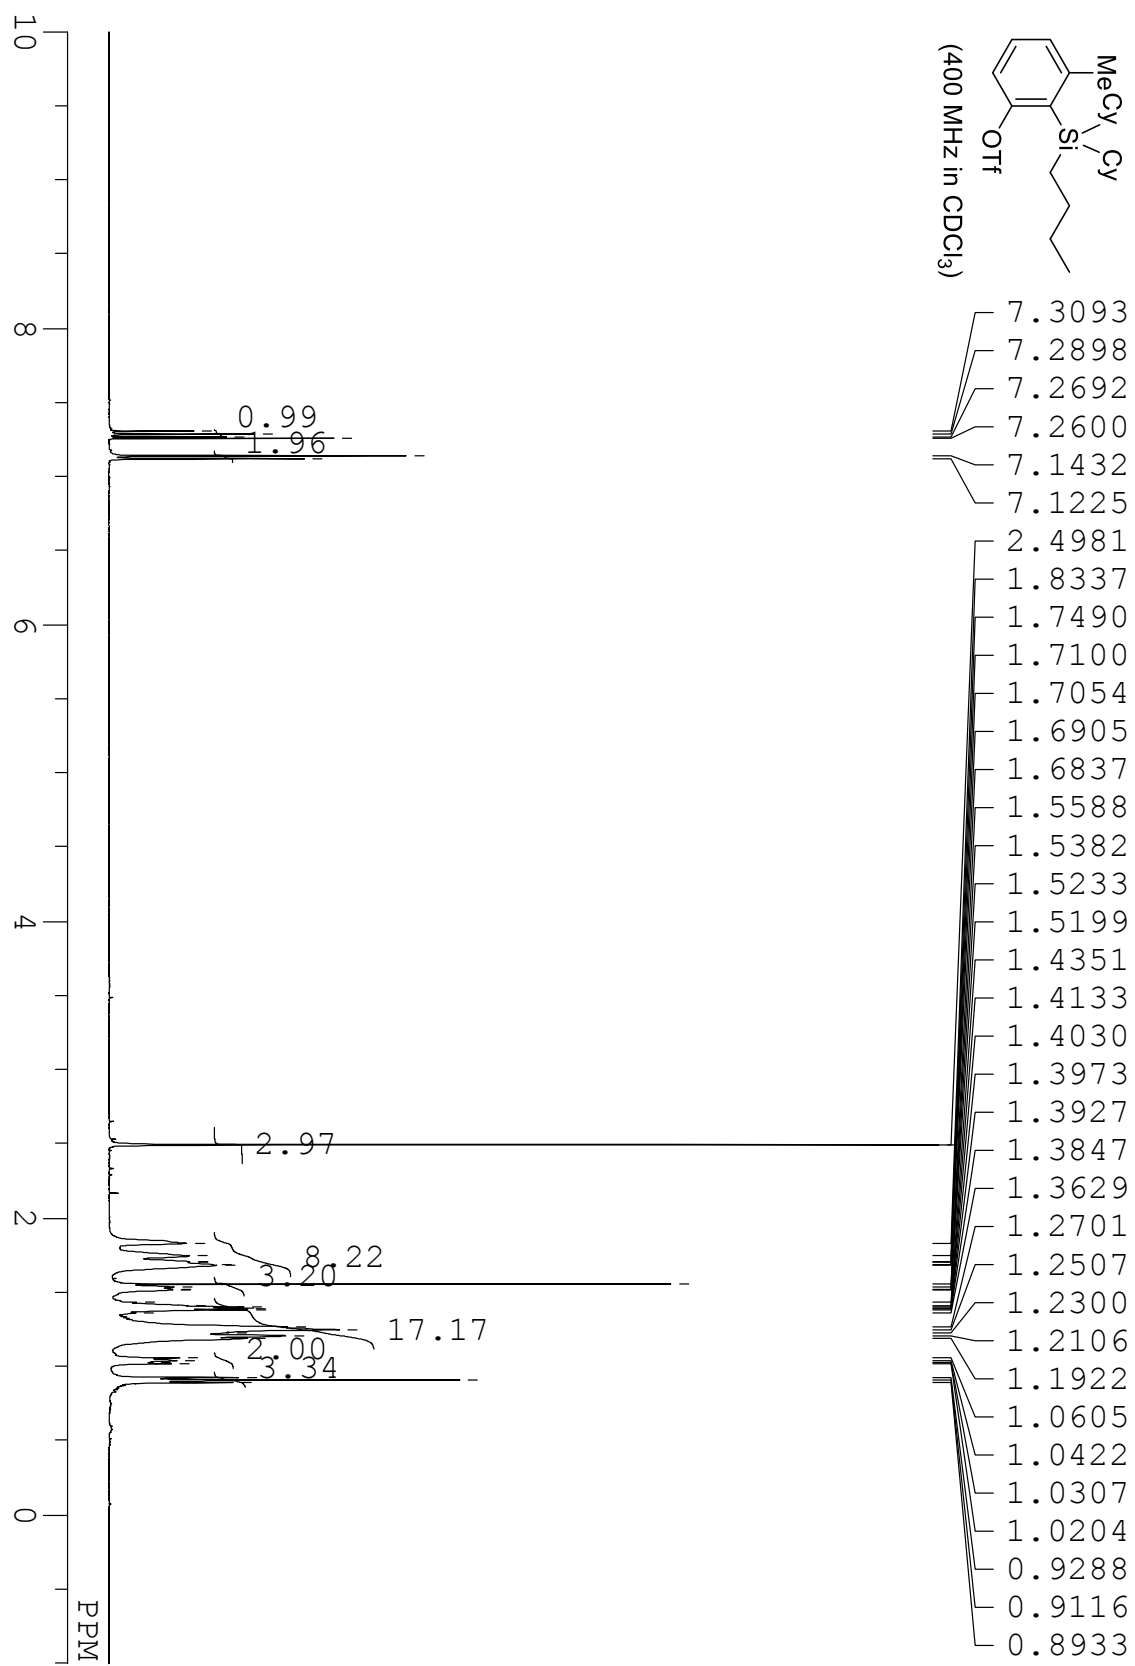

compound **1i**

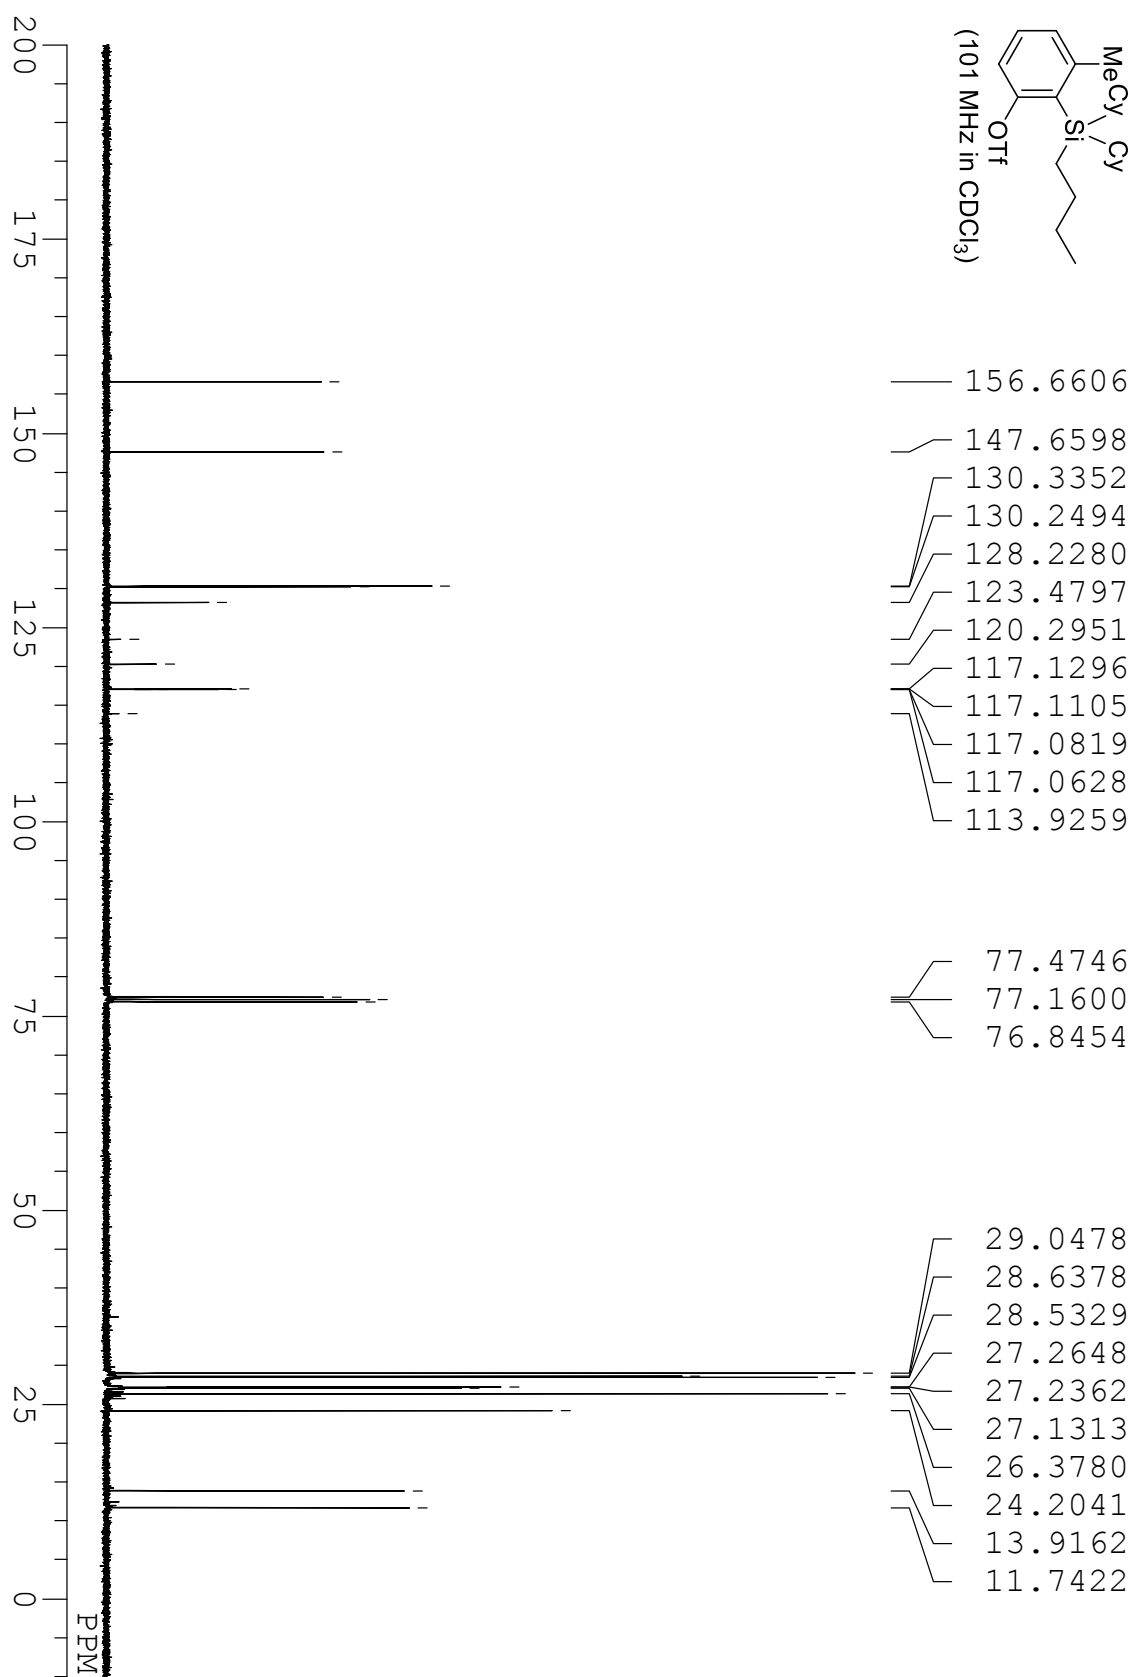

compound **1j**

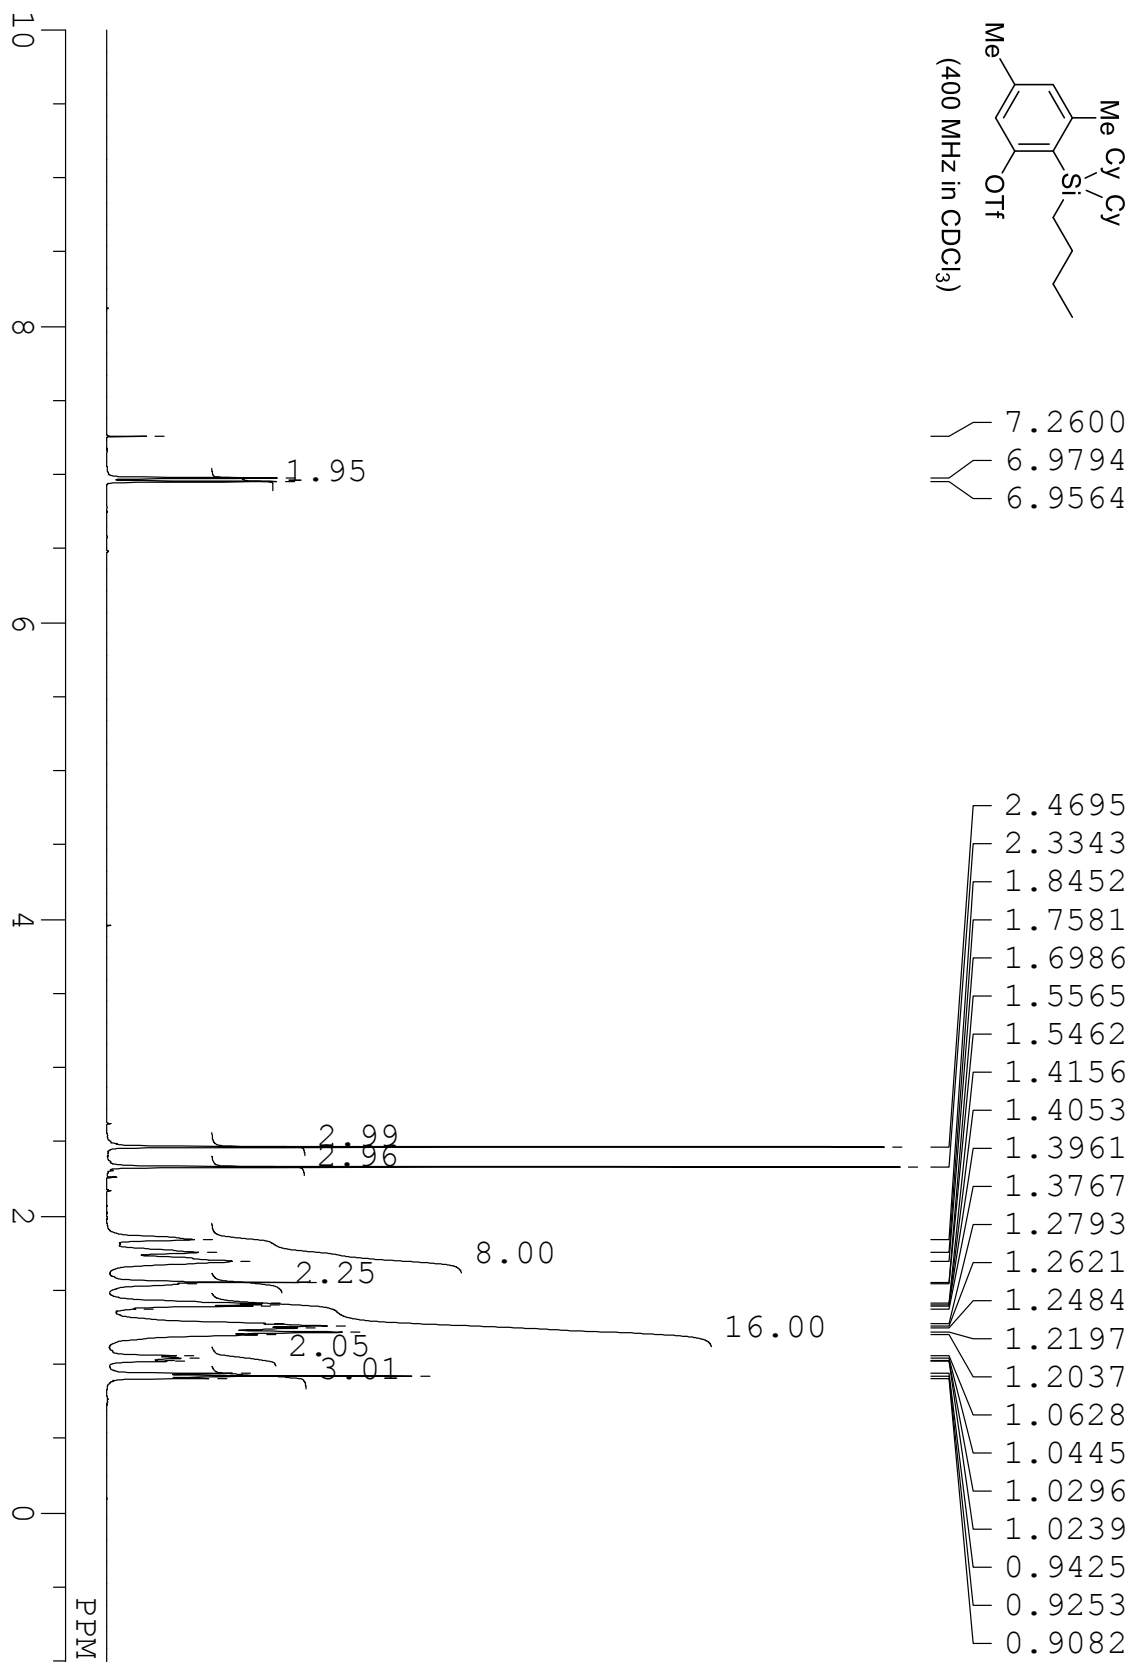

compound 1j

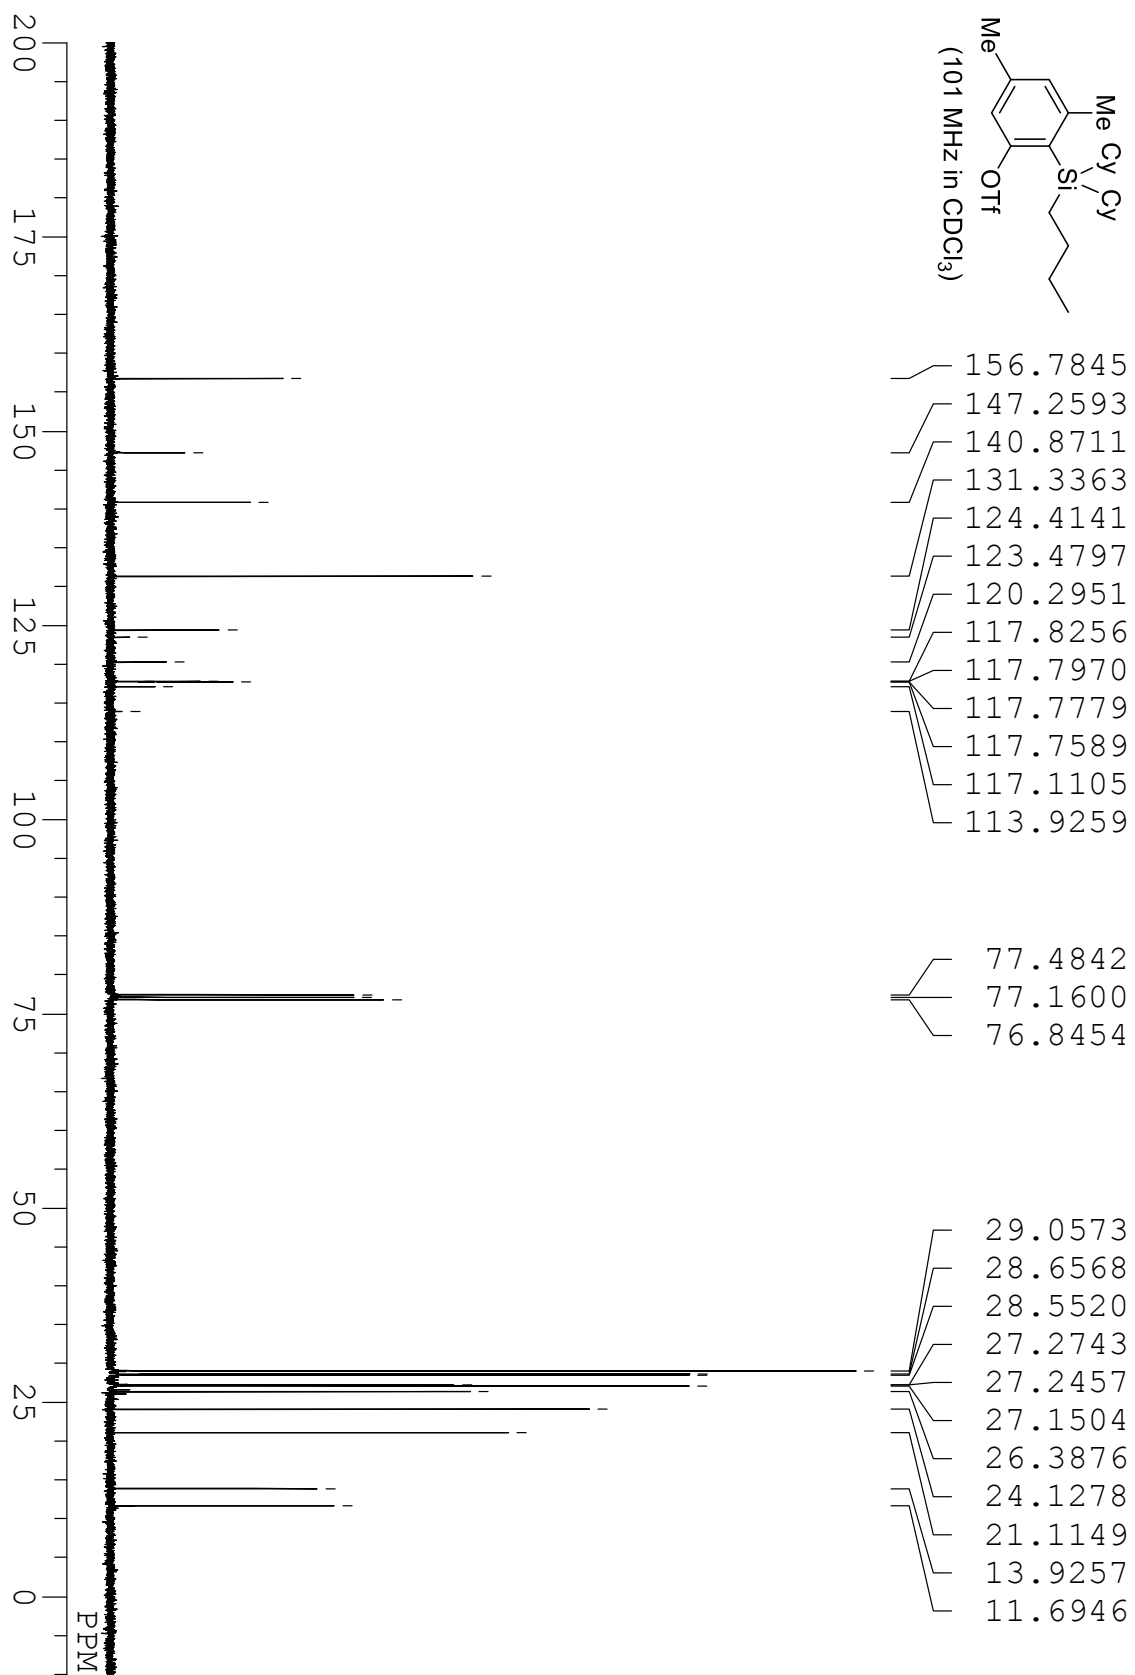

compound **1k**

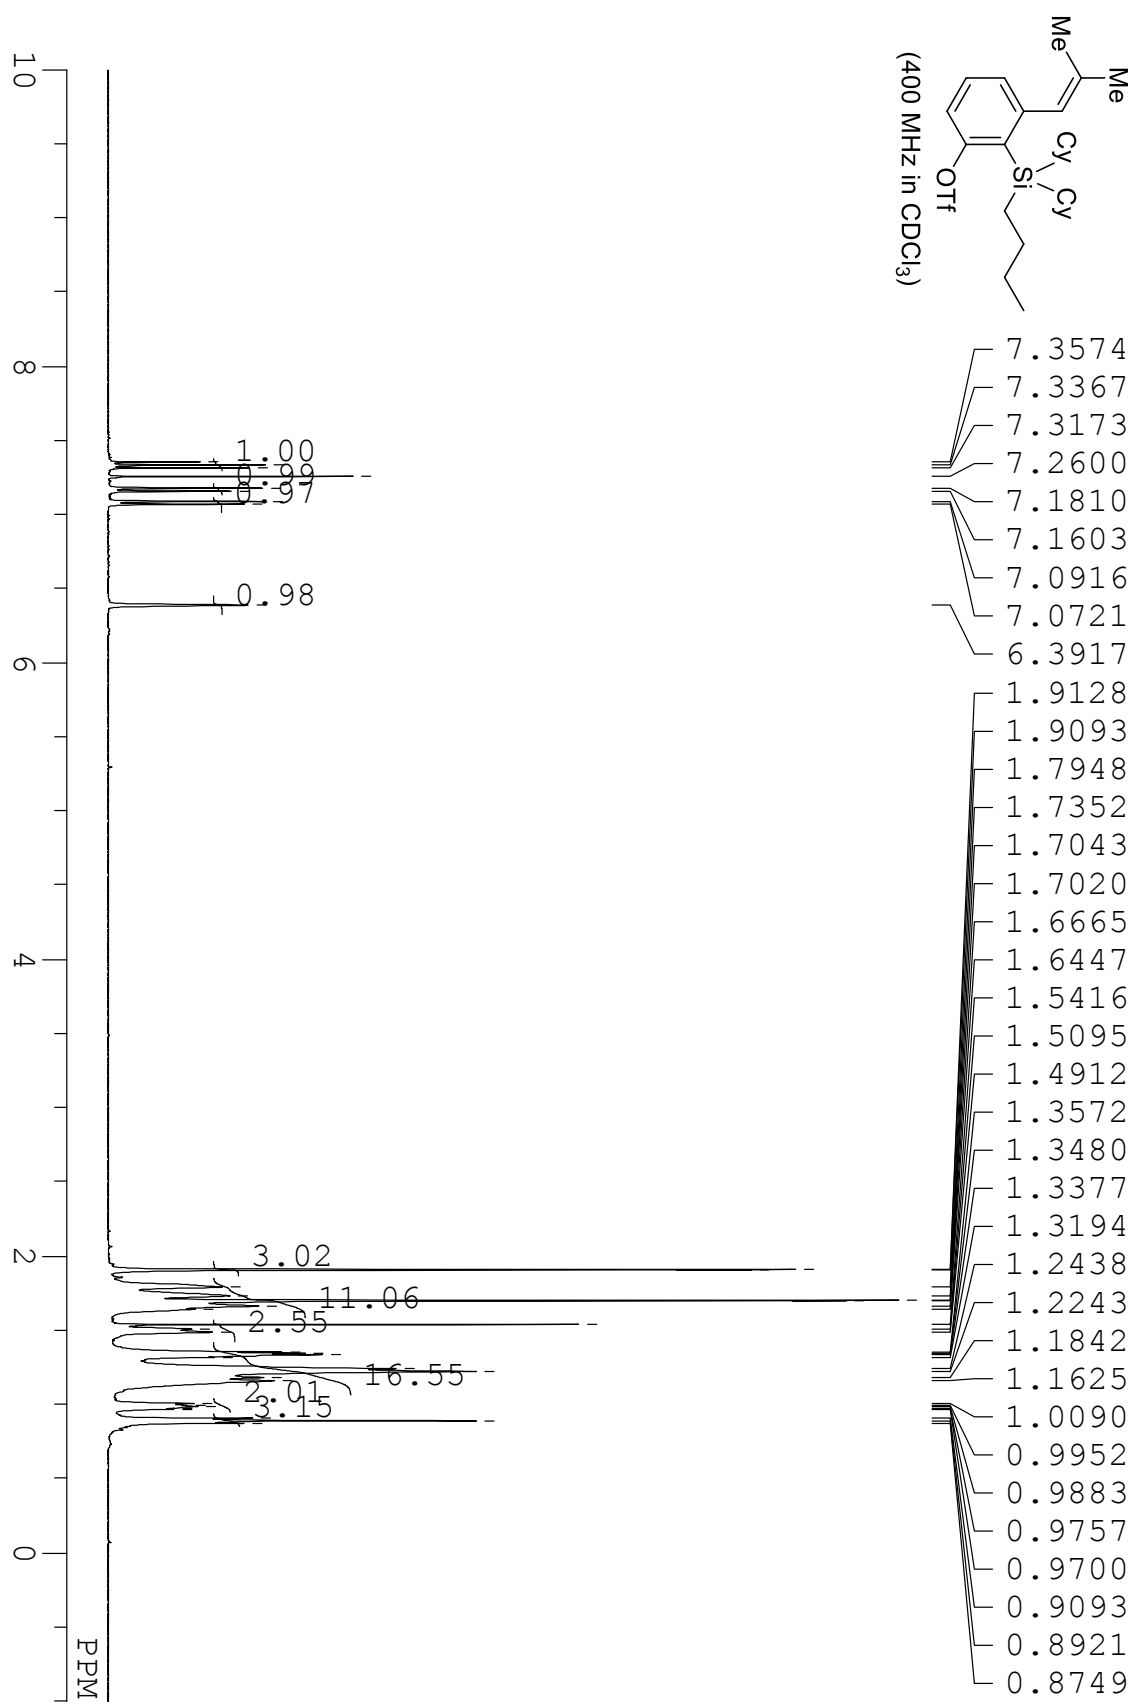

compound 1k

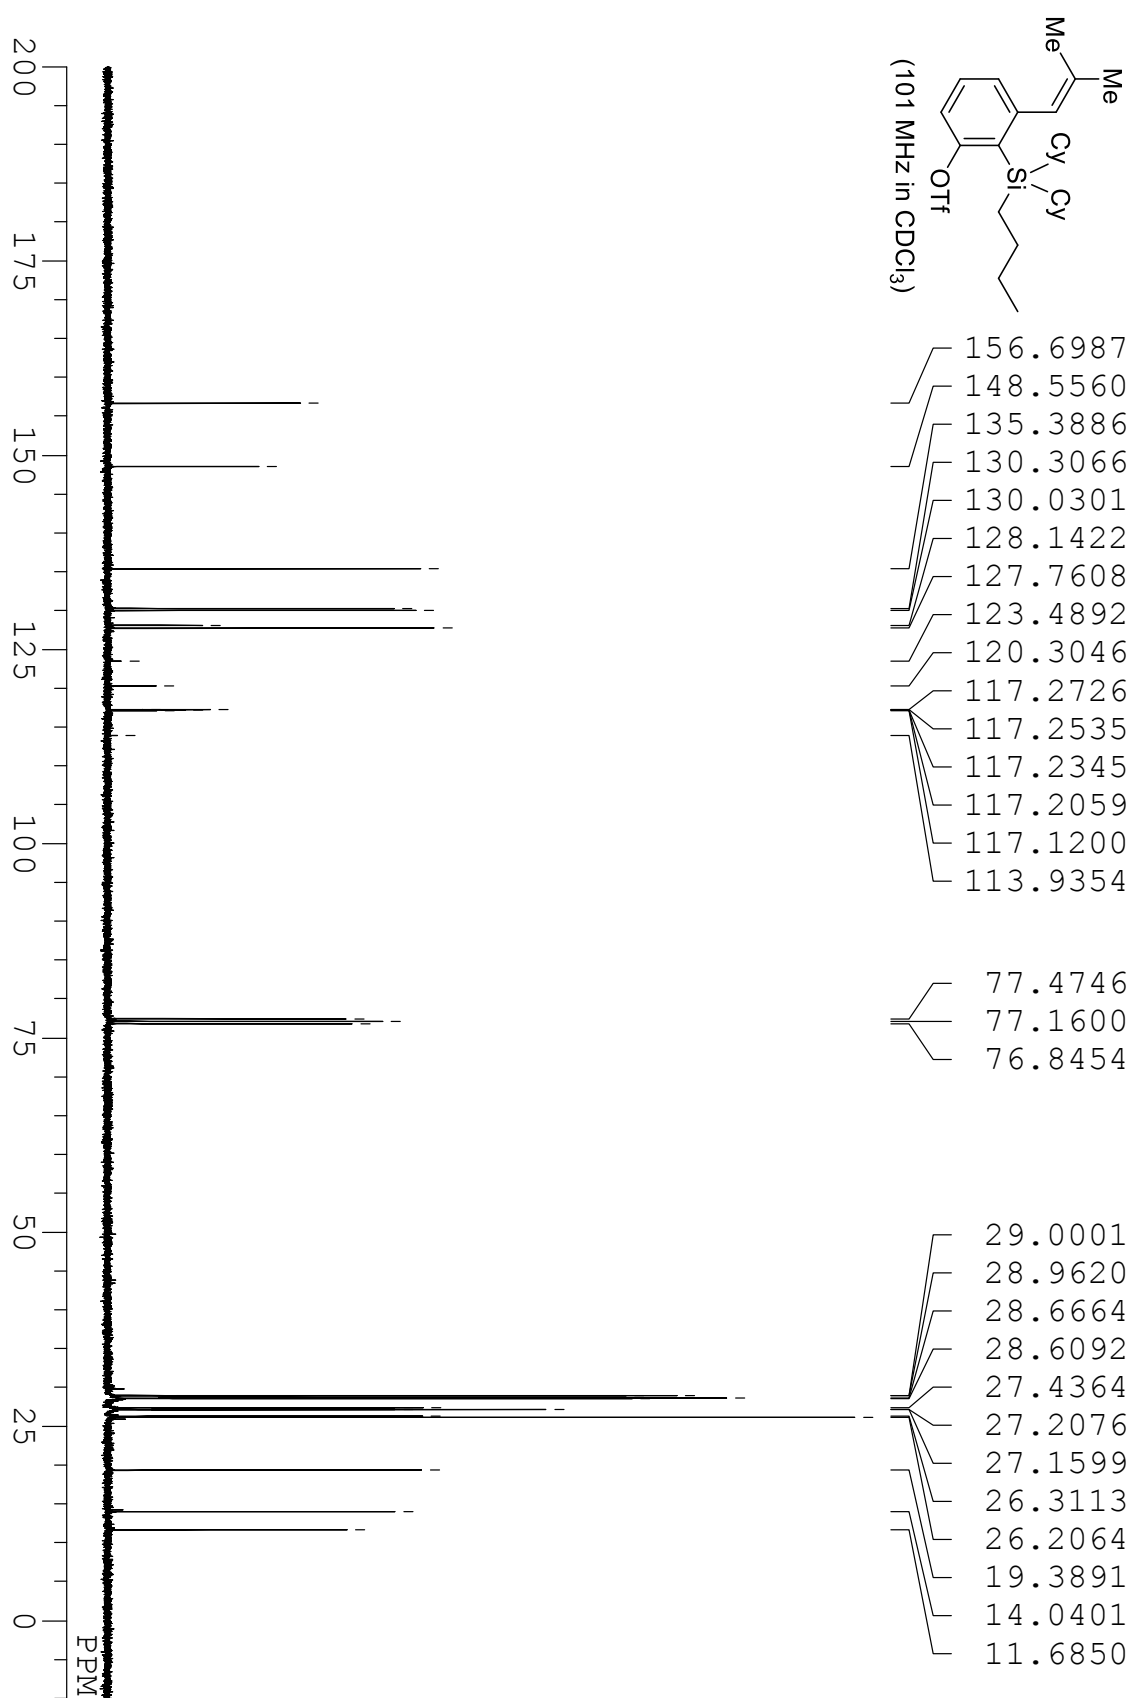

compound 11

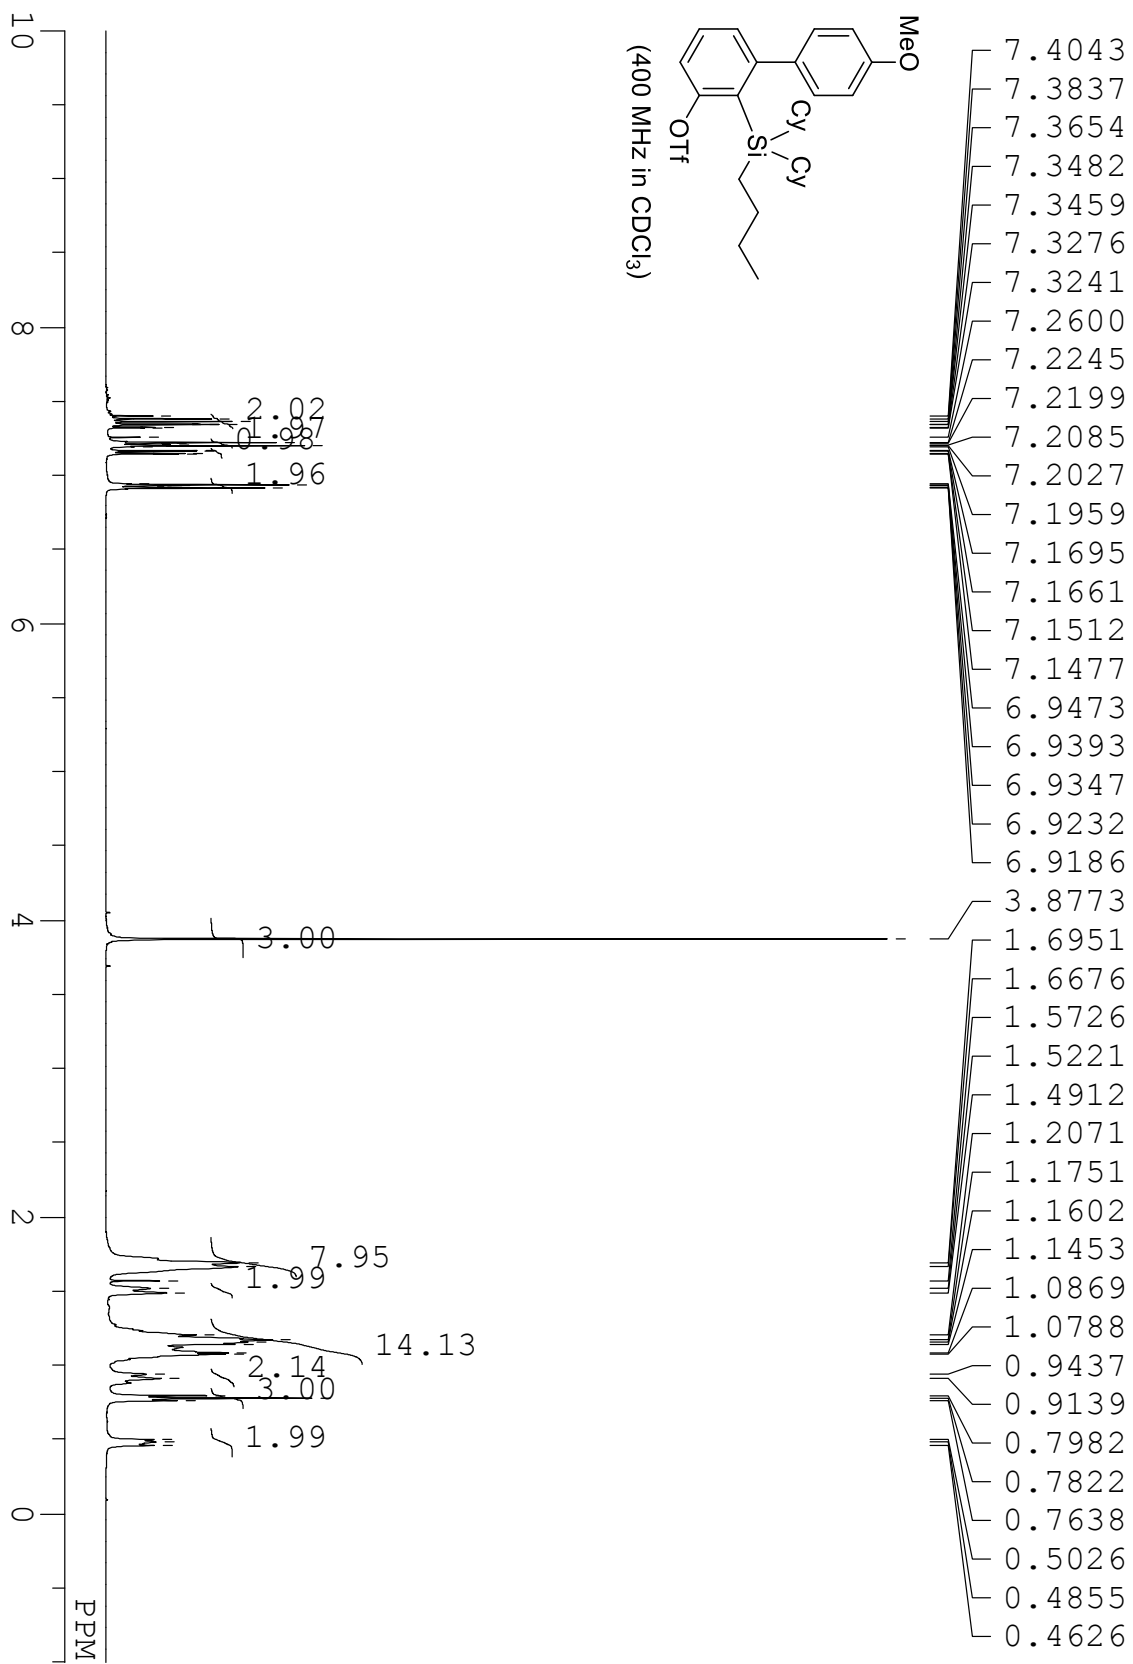

compound 11

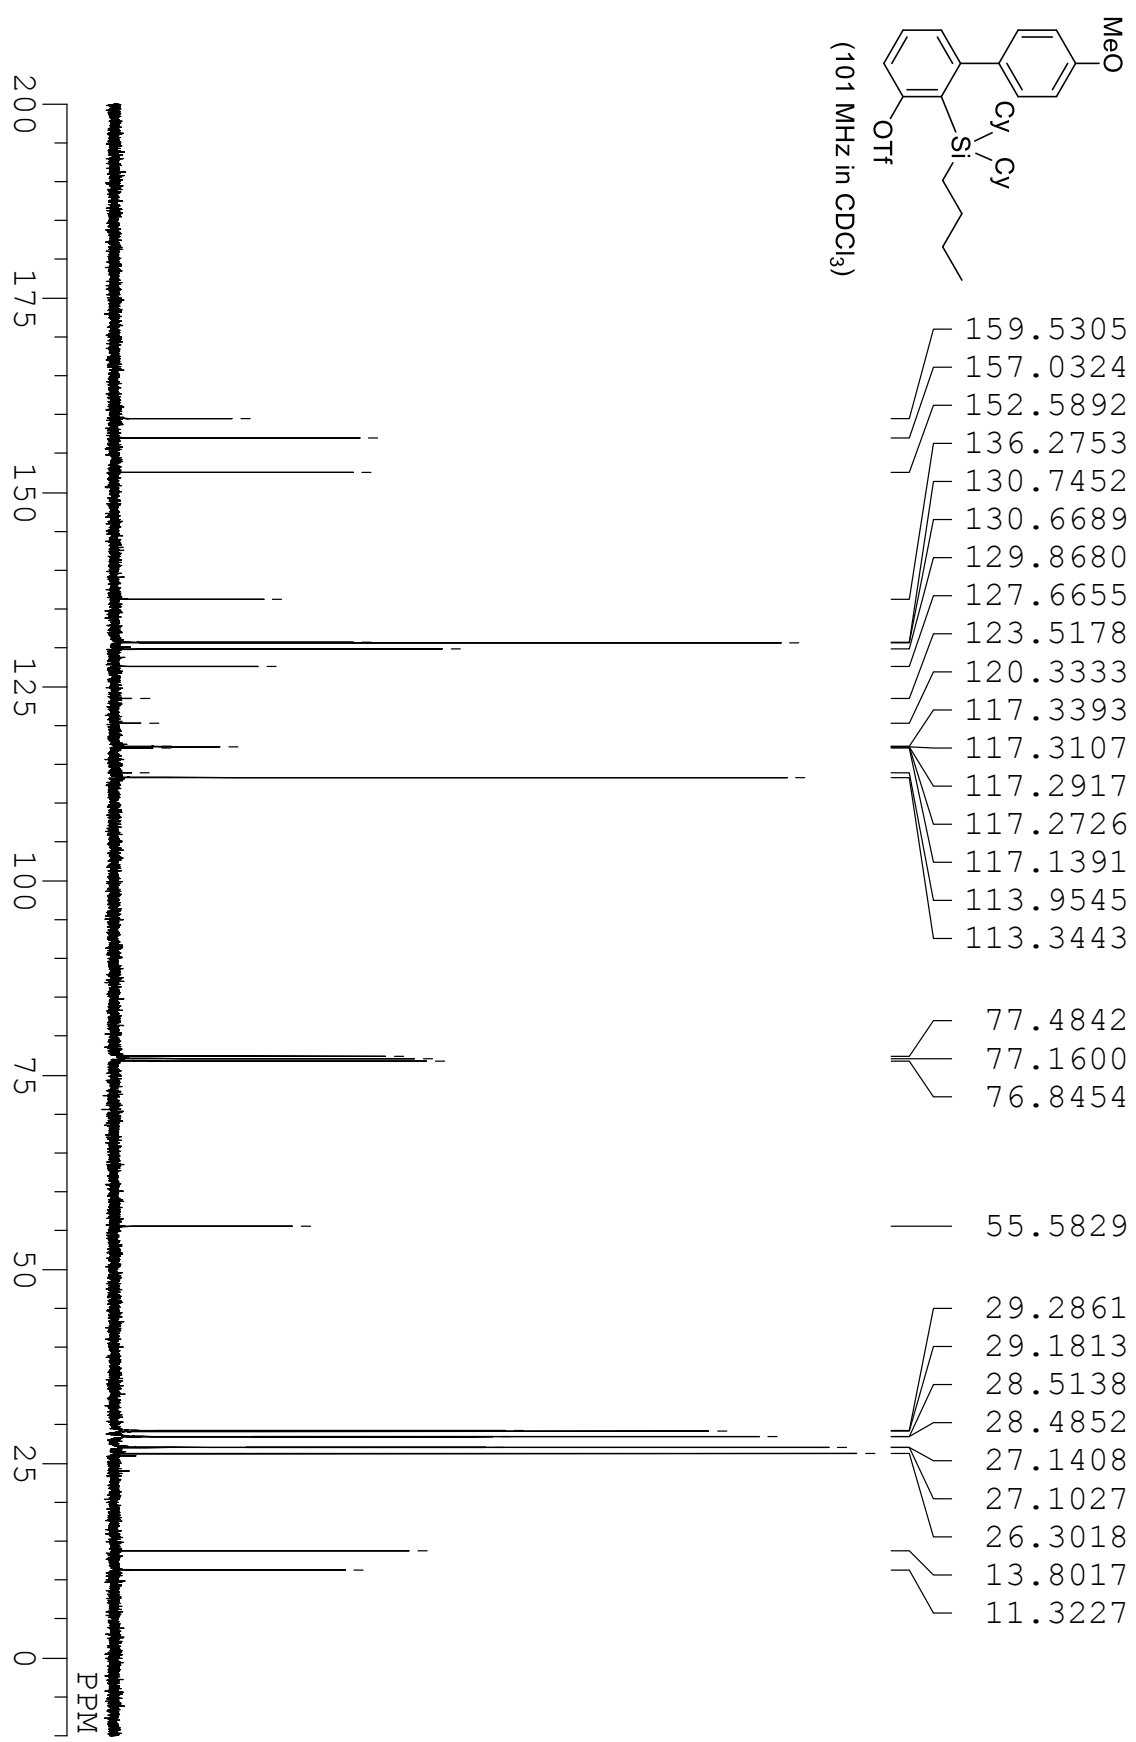



compound **1m**

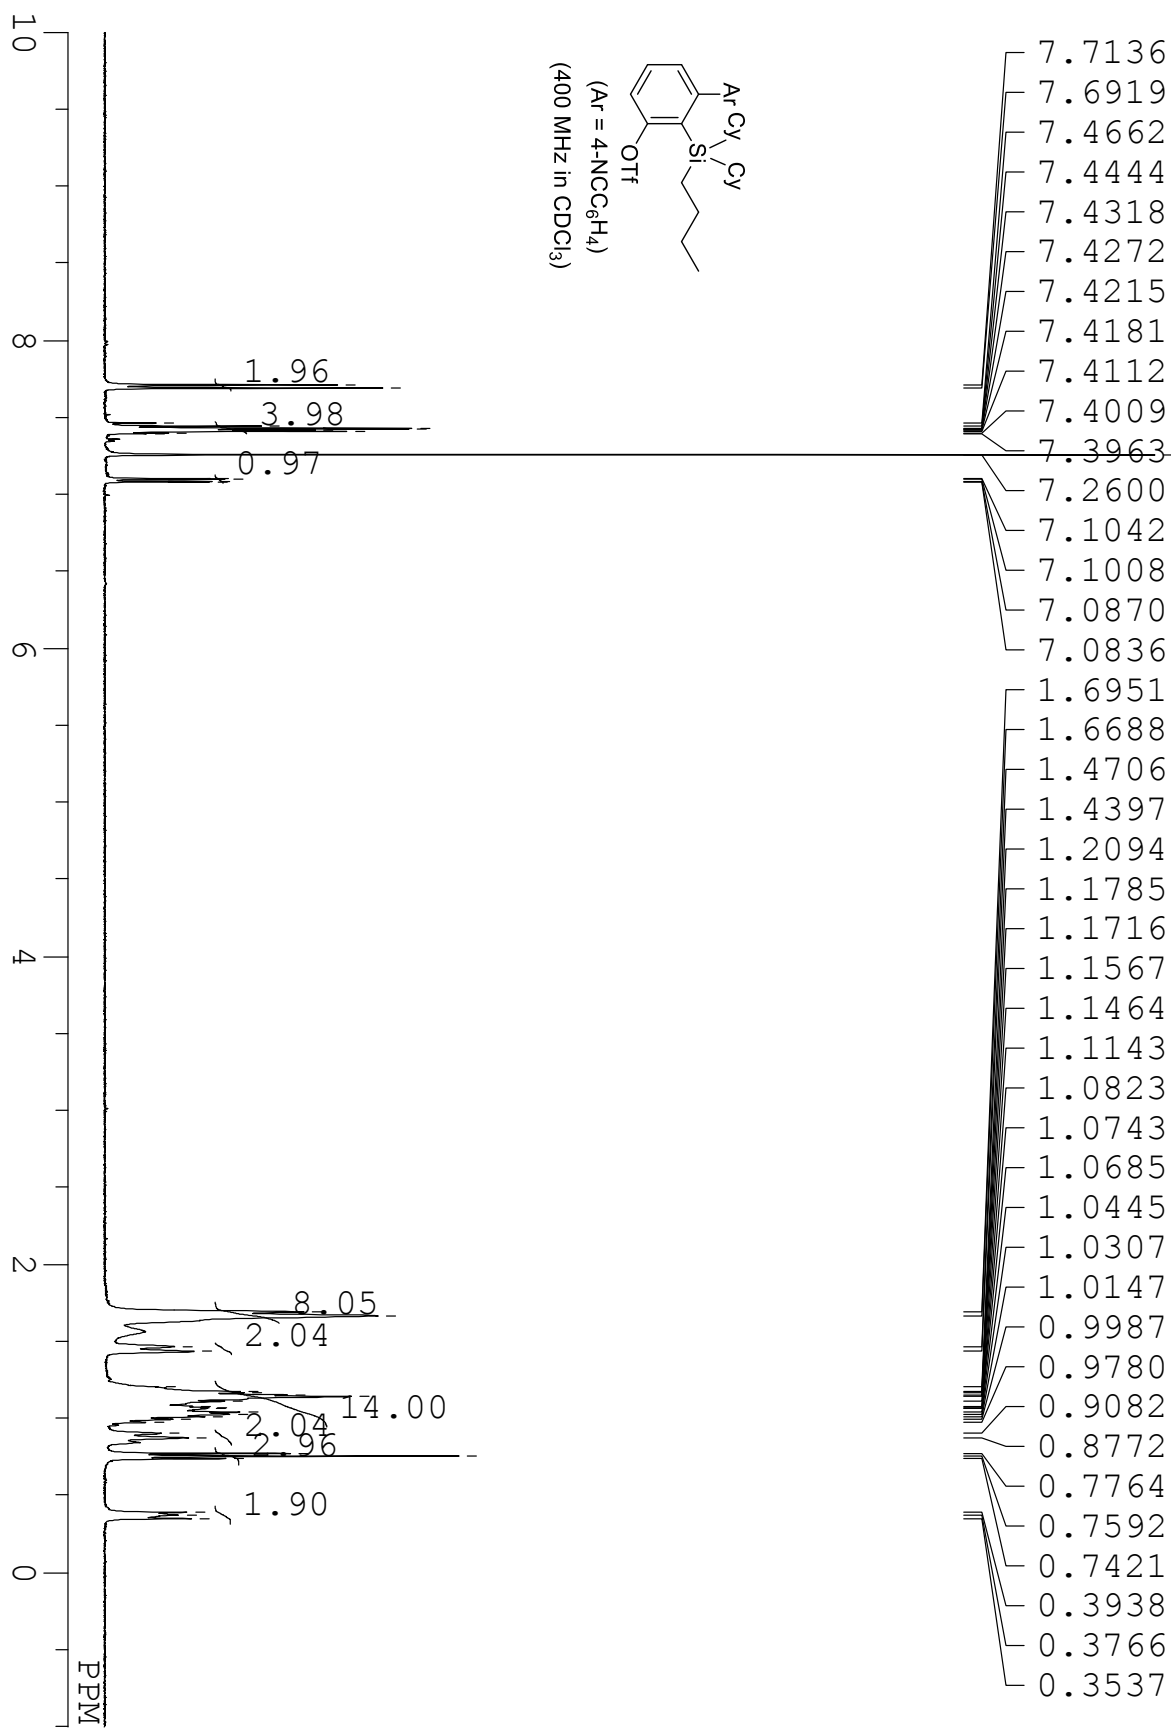

compound **1m**

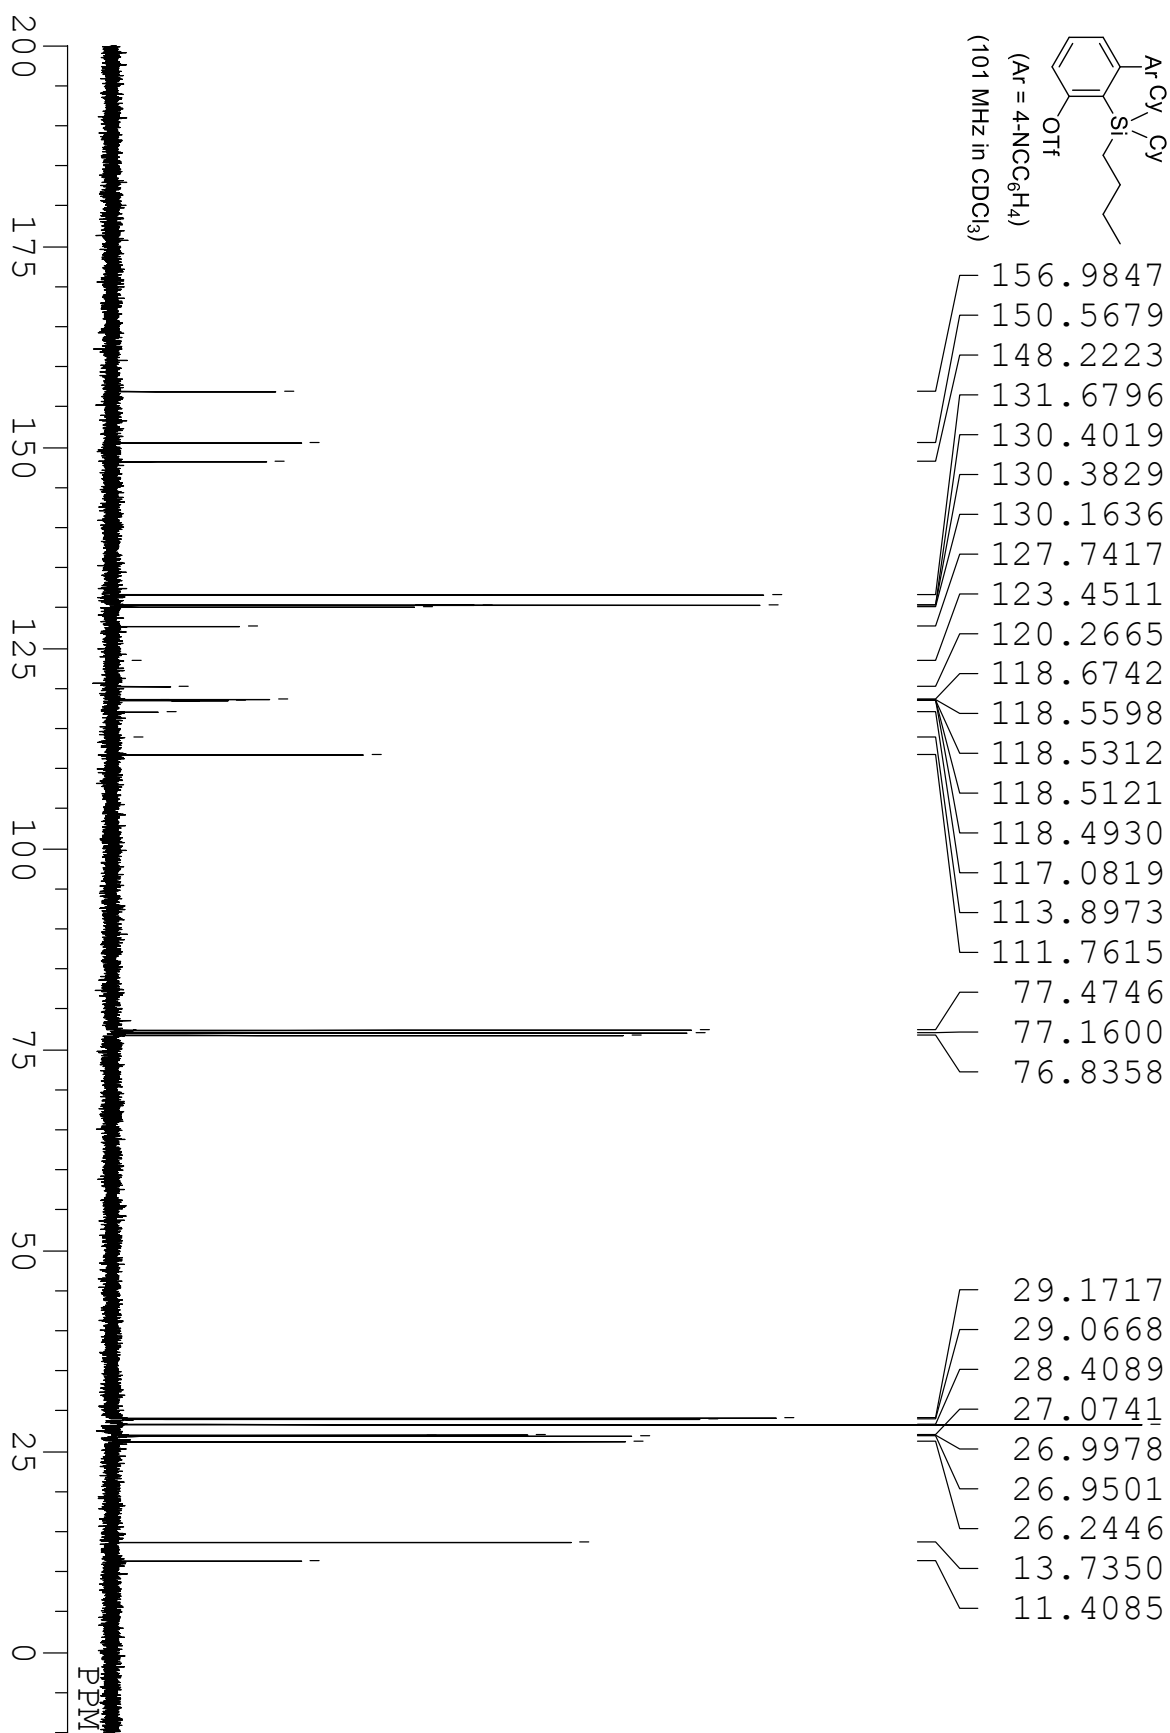

compound **1n**

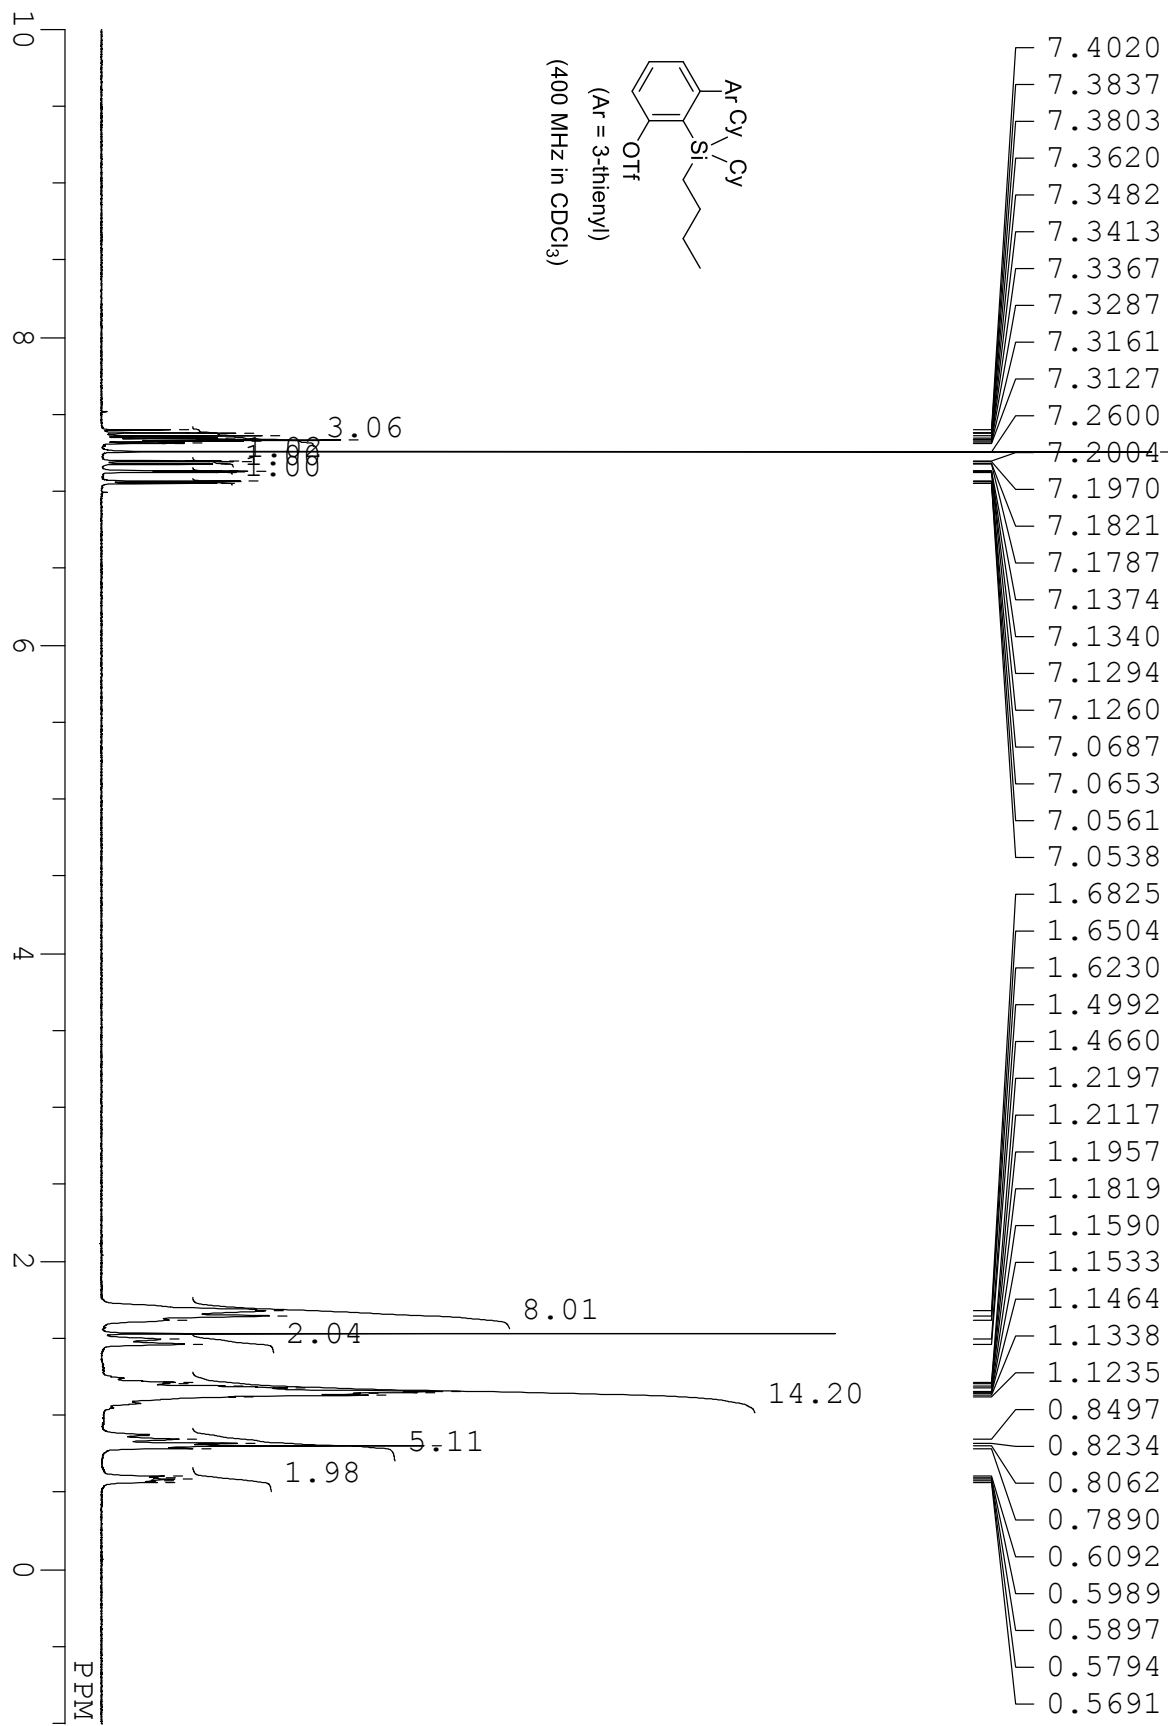

compound **1n**

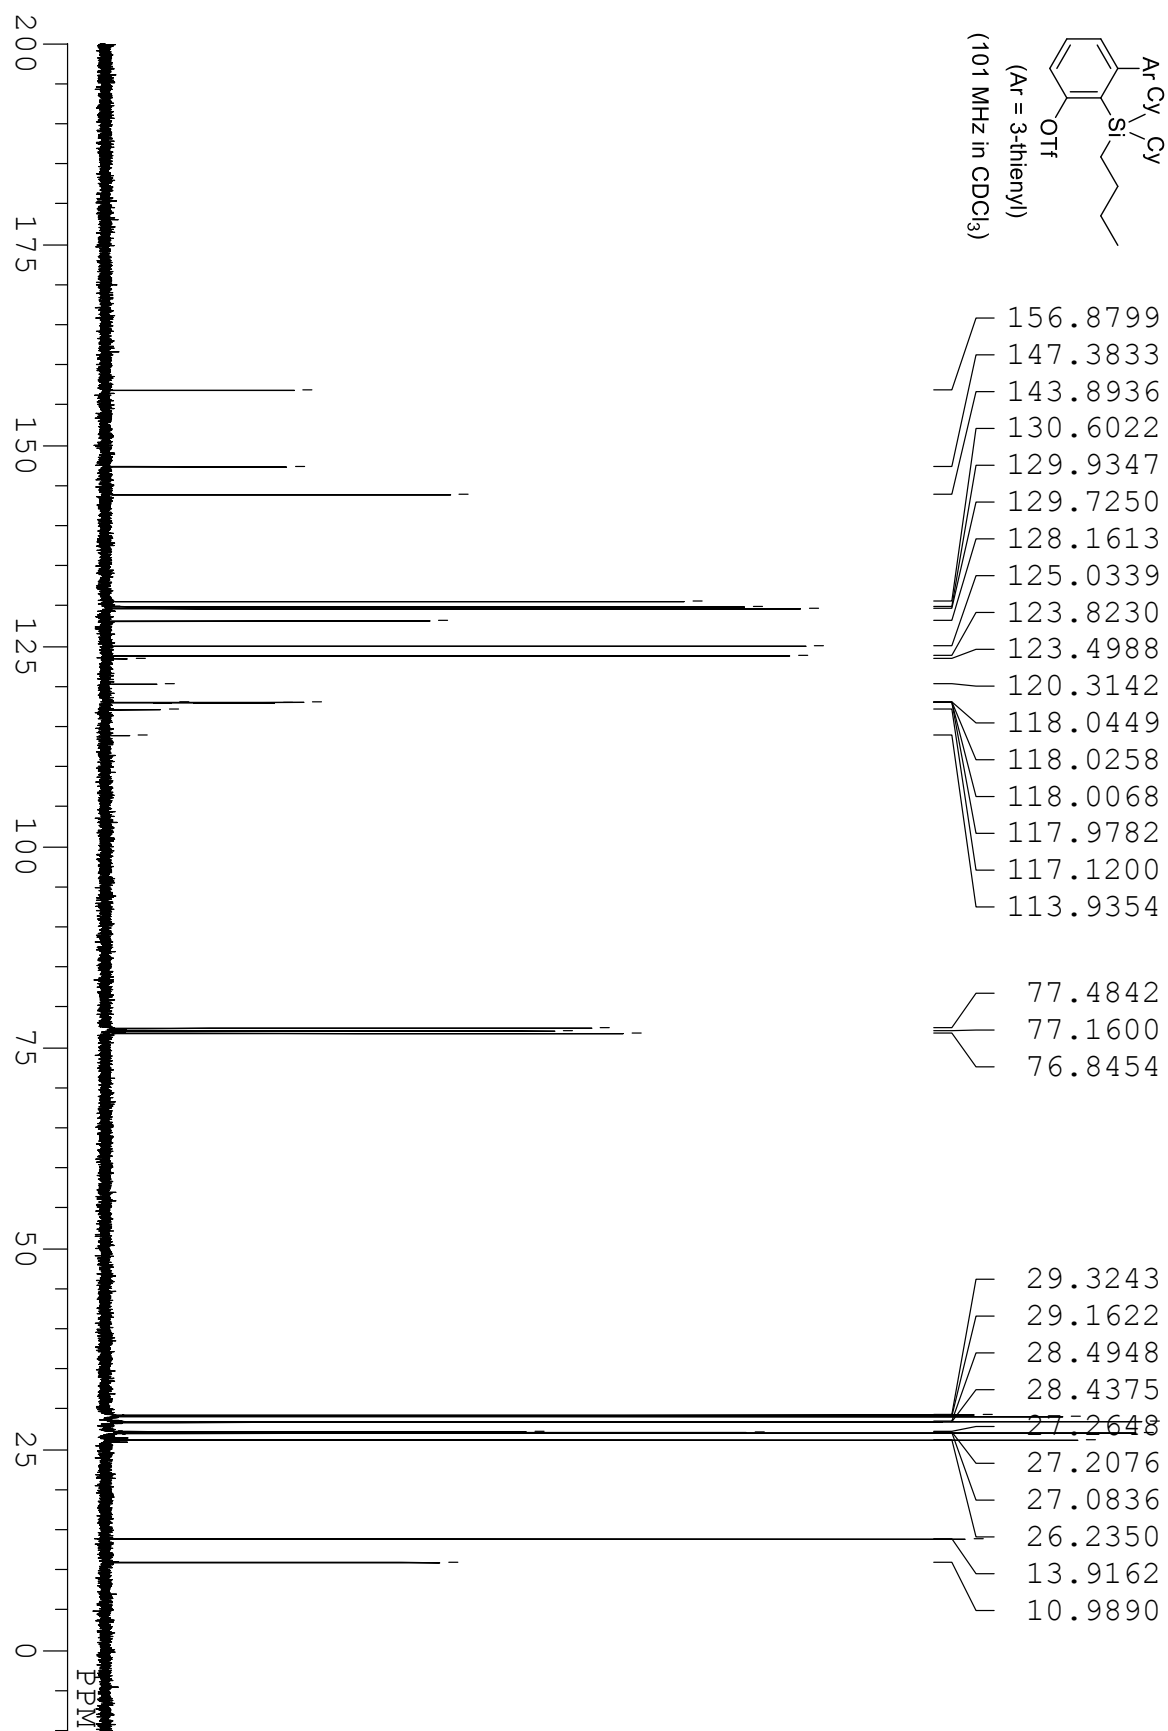

compound **1o**

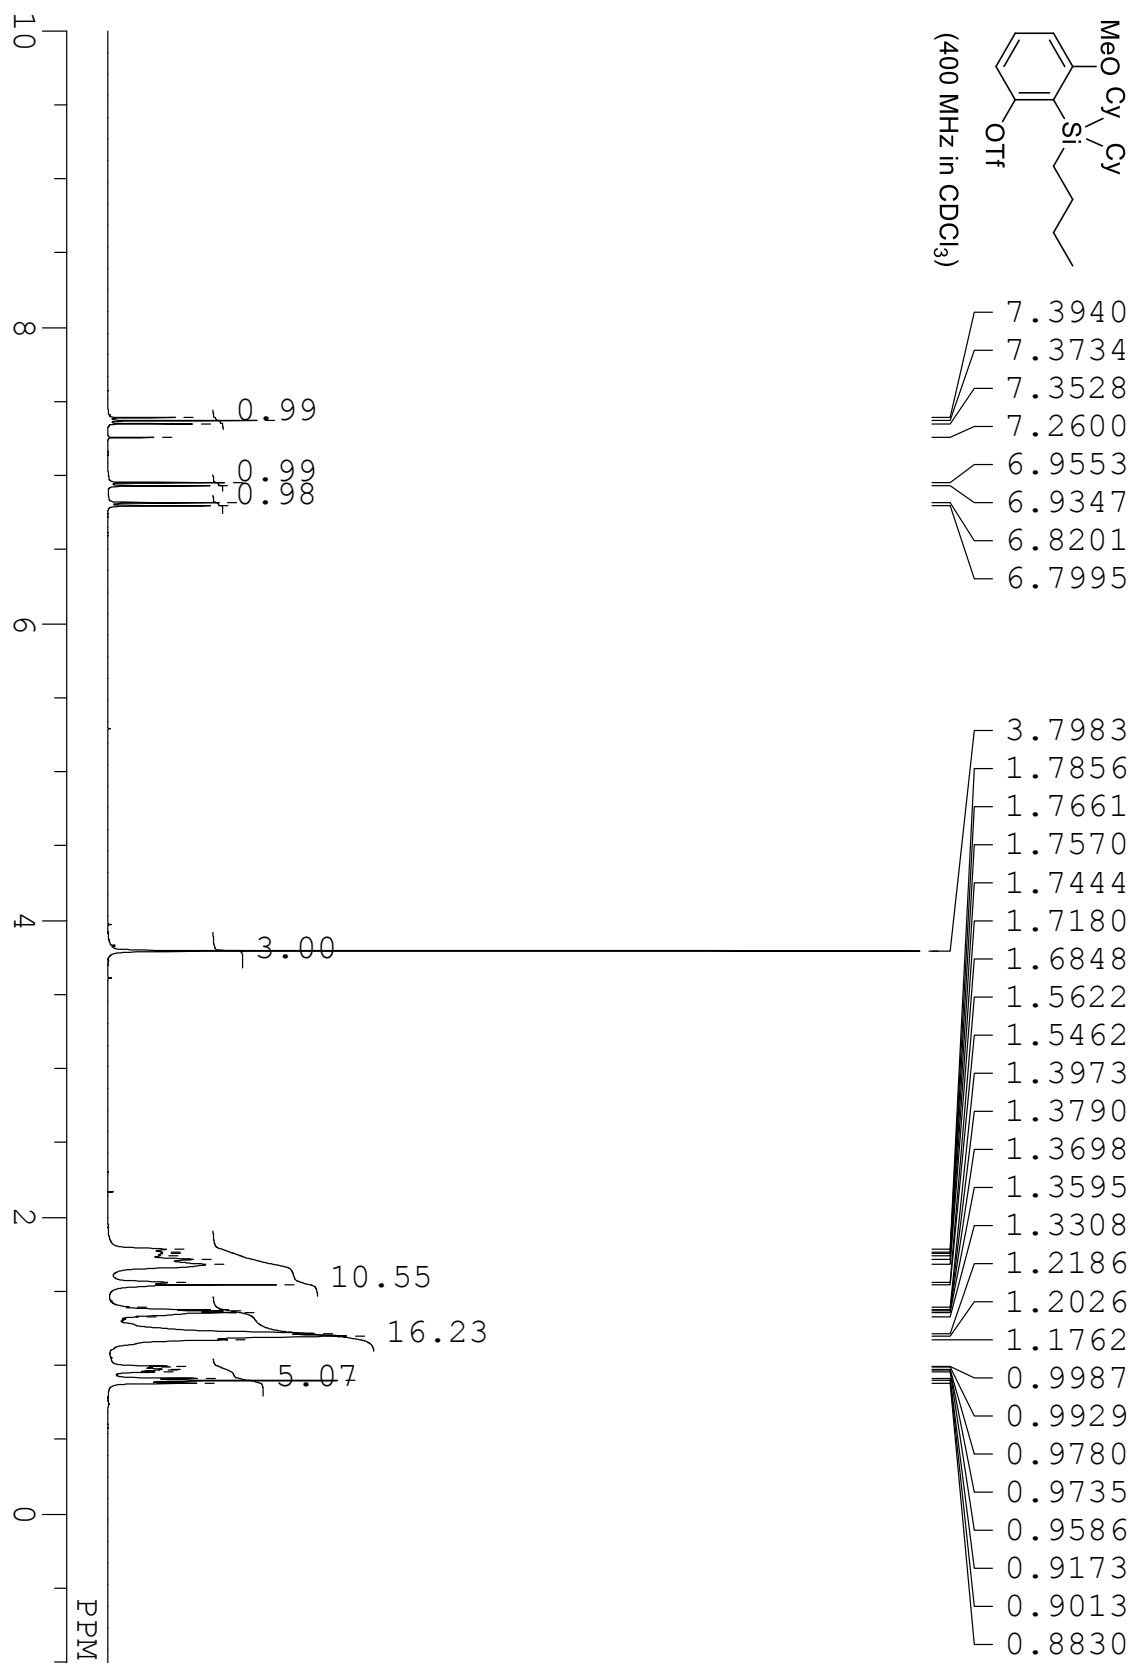

compound 10

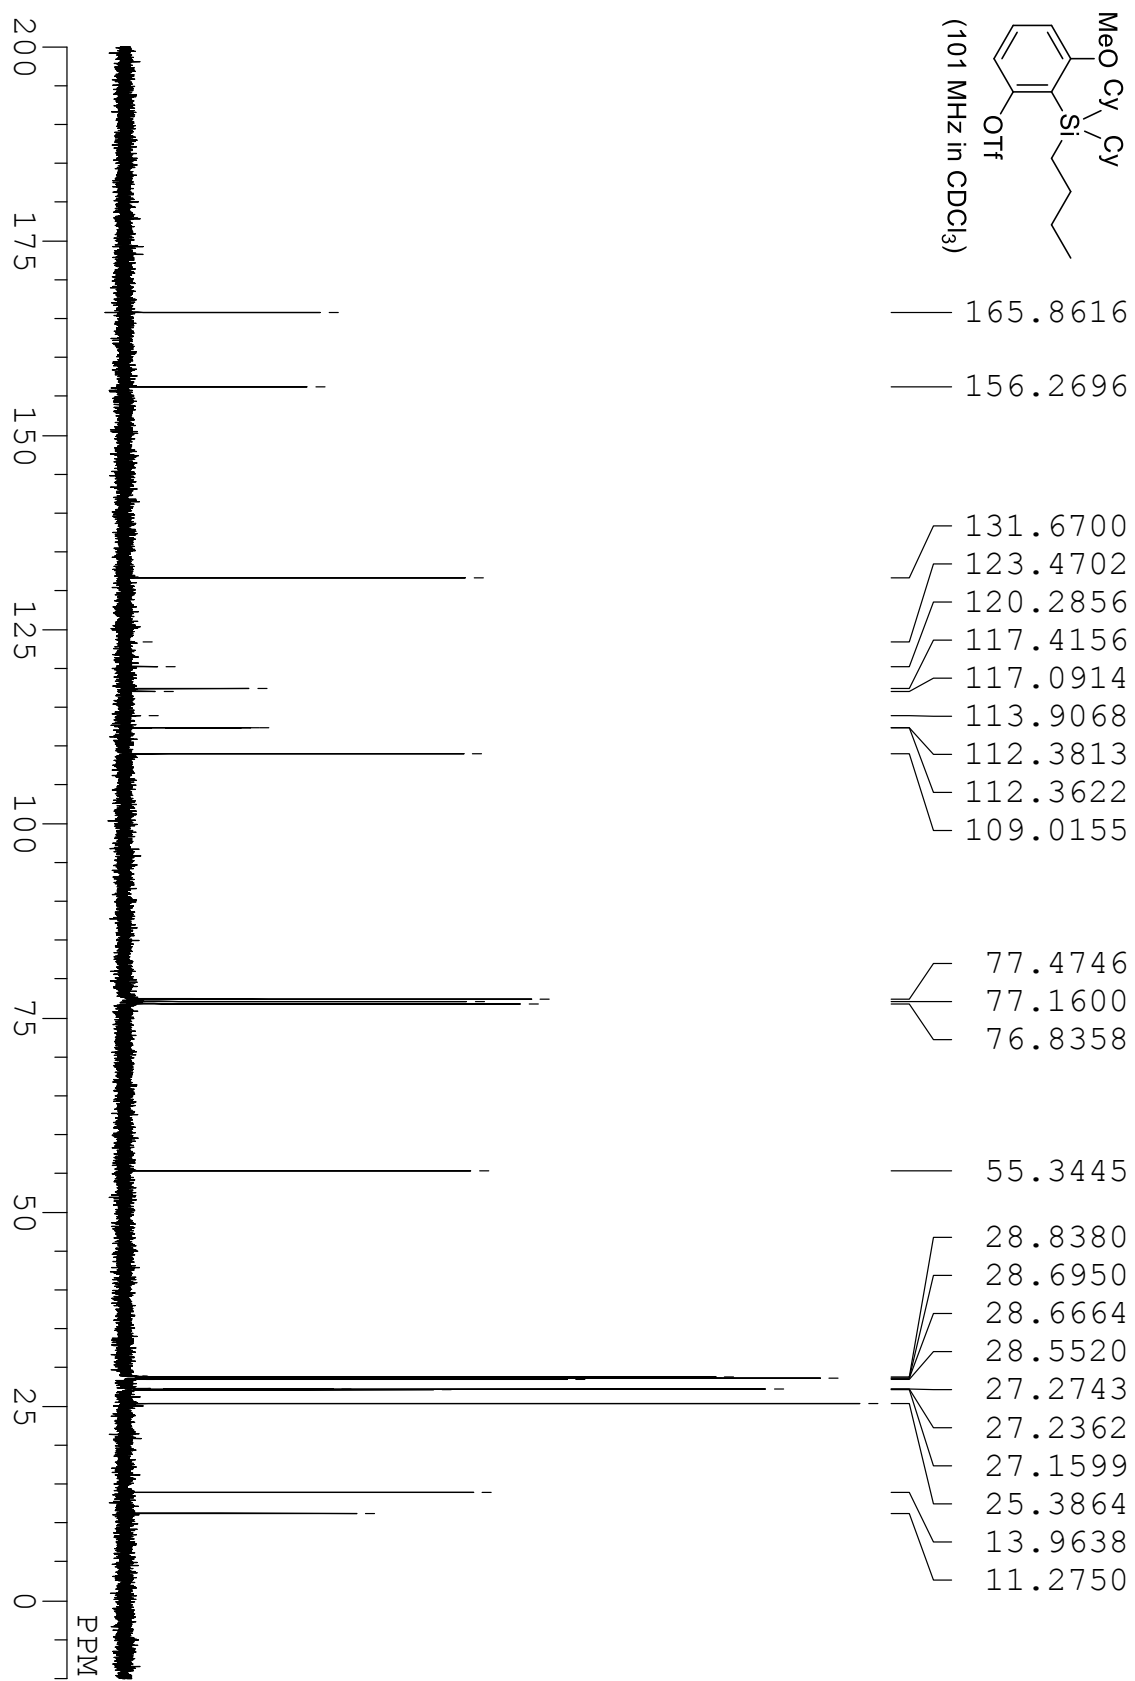

compound **1p**

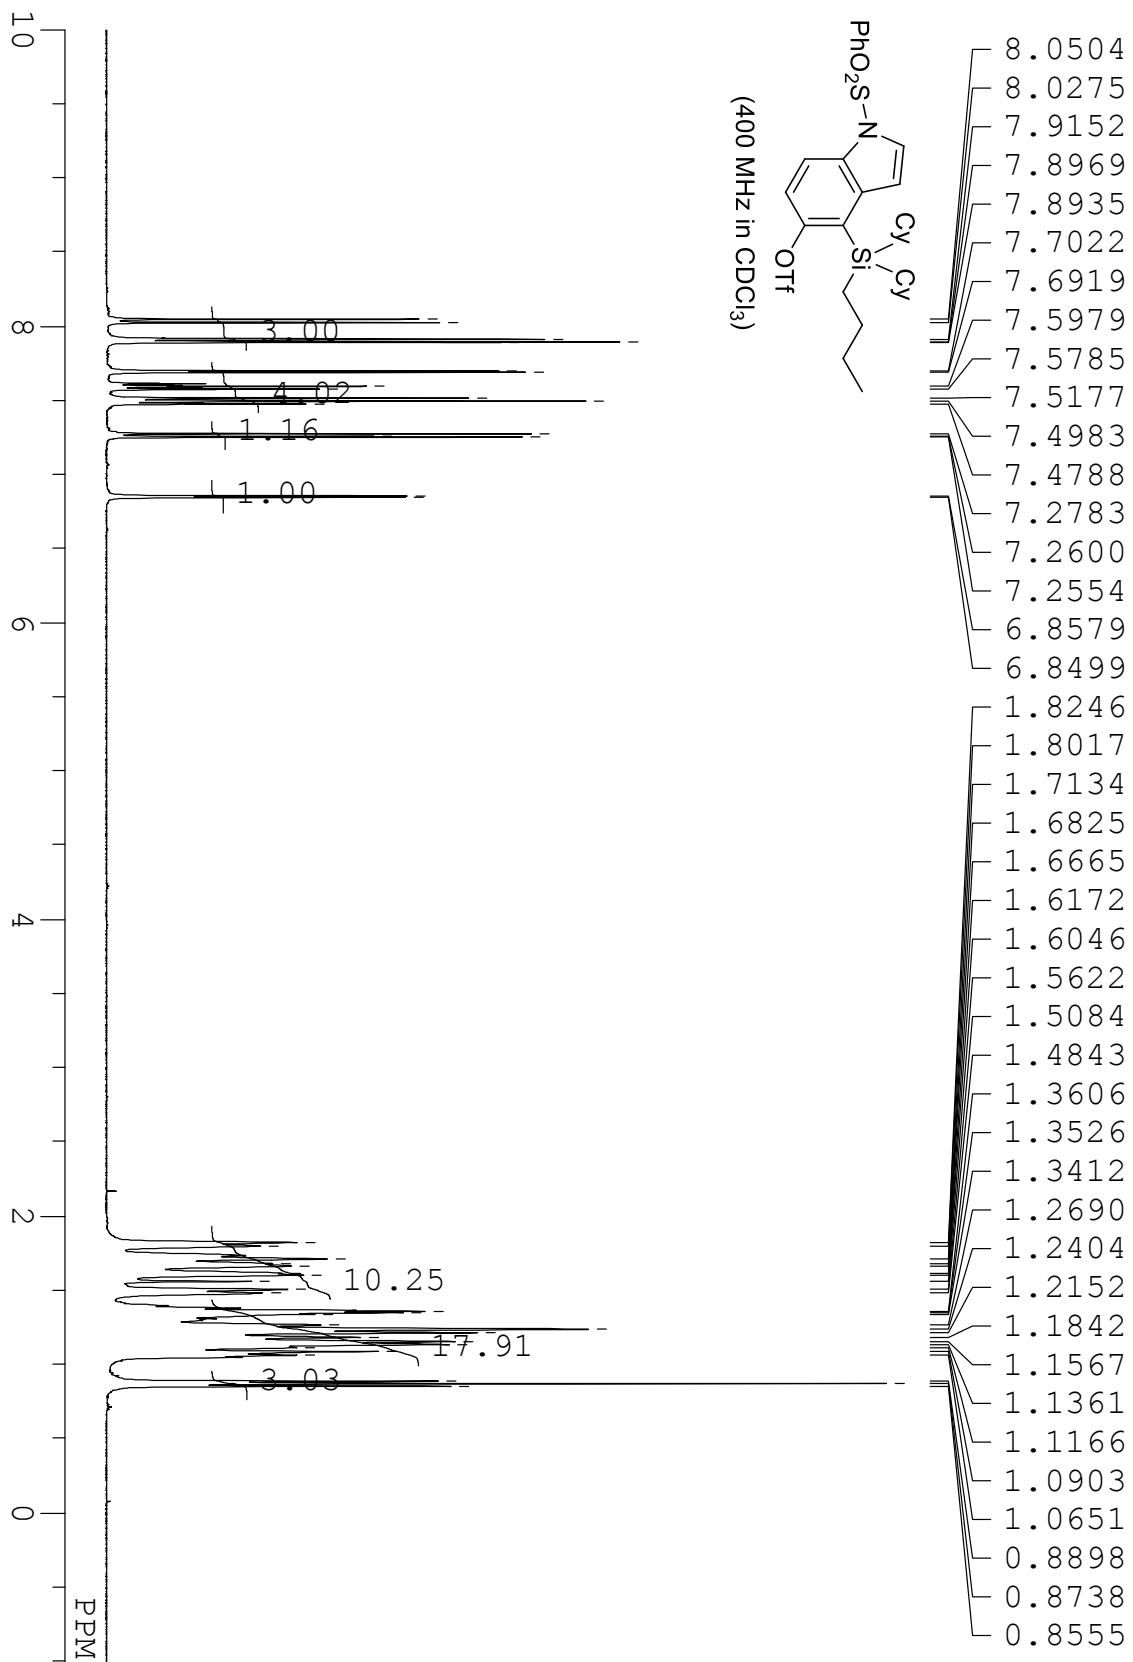

compound 1p

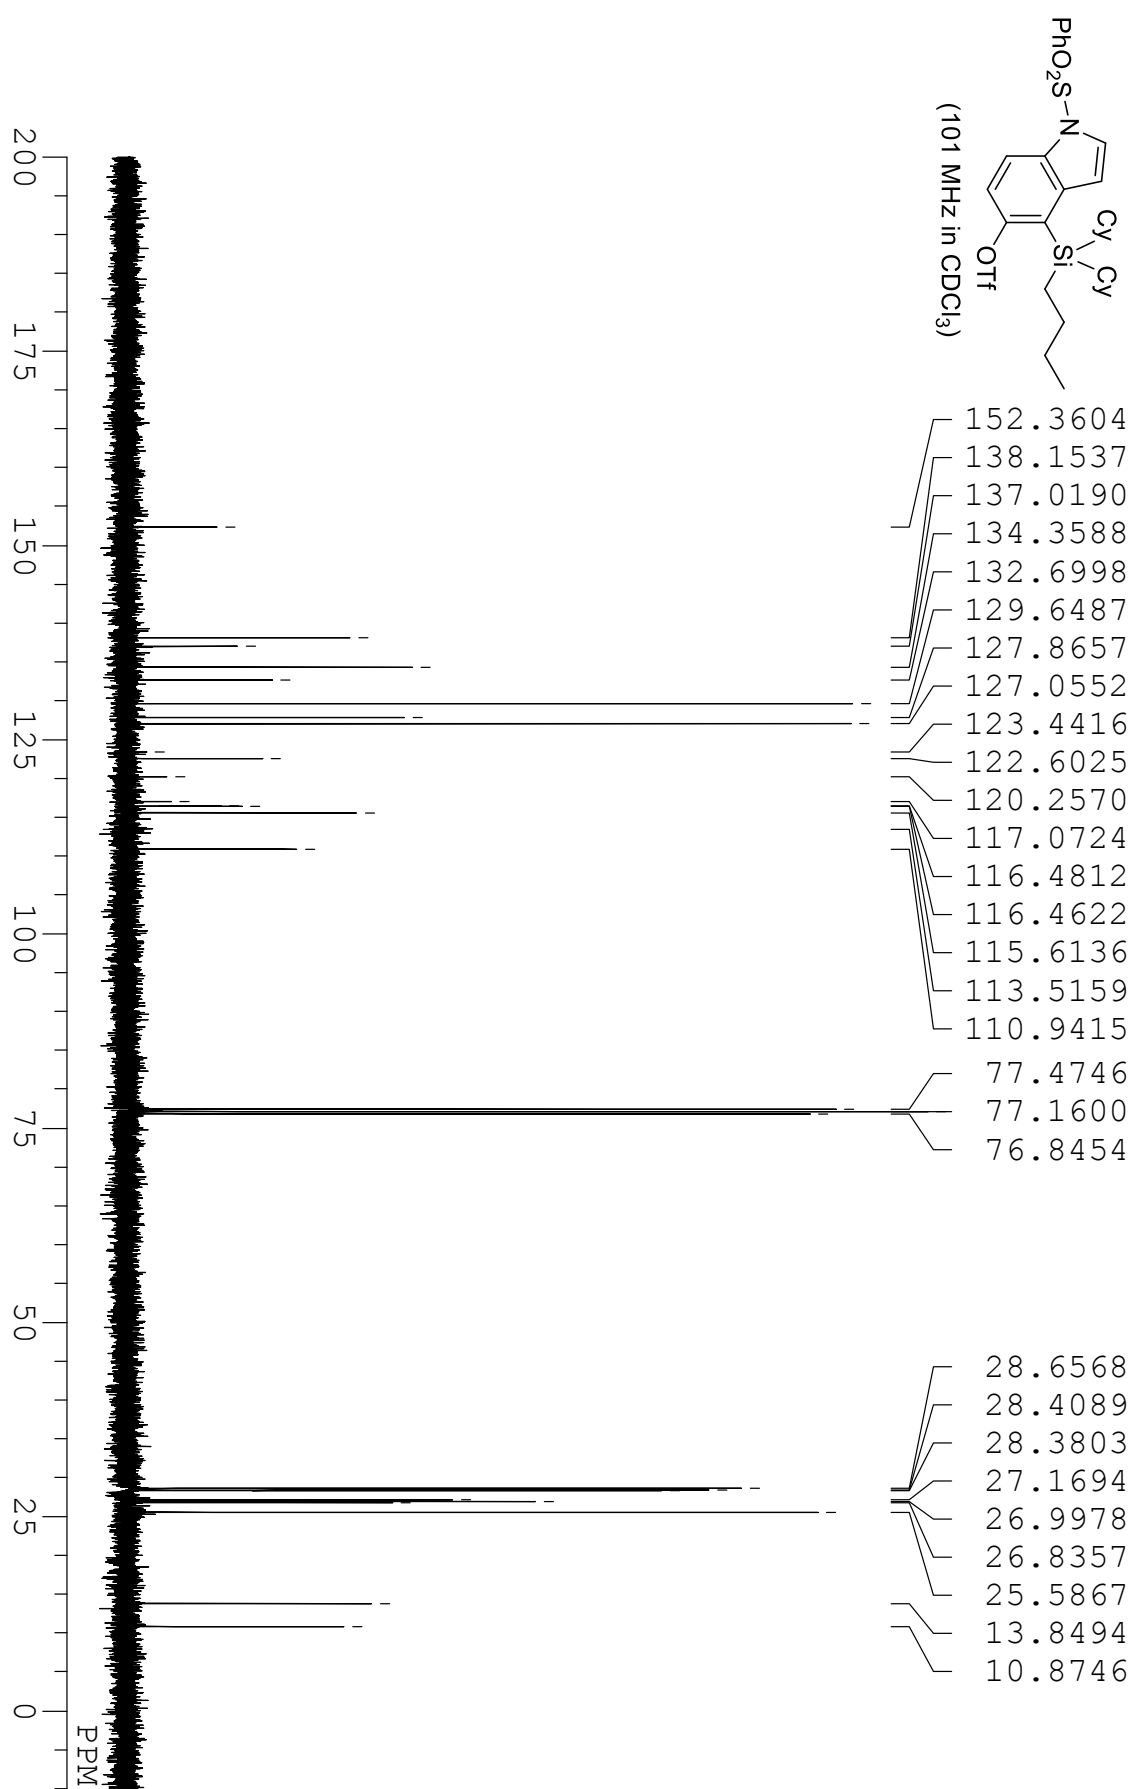



compound **1q**

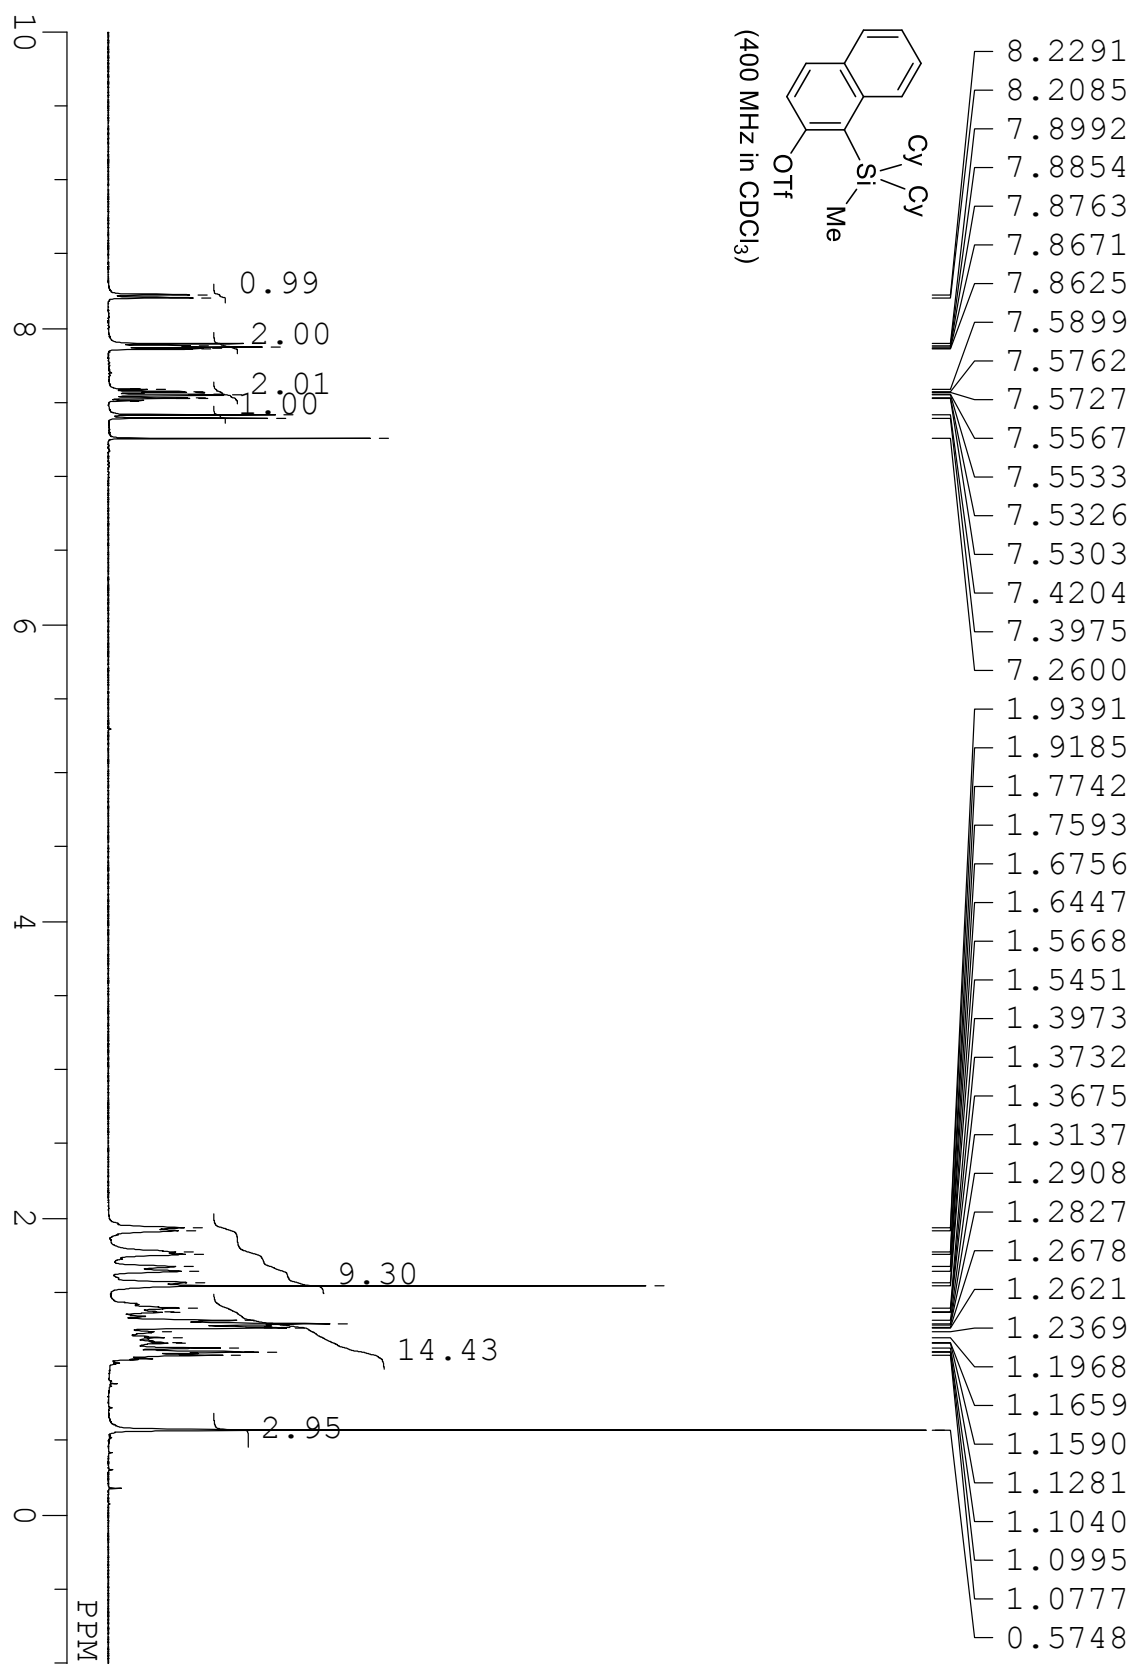

compound 1q

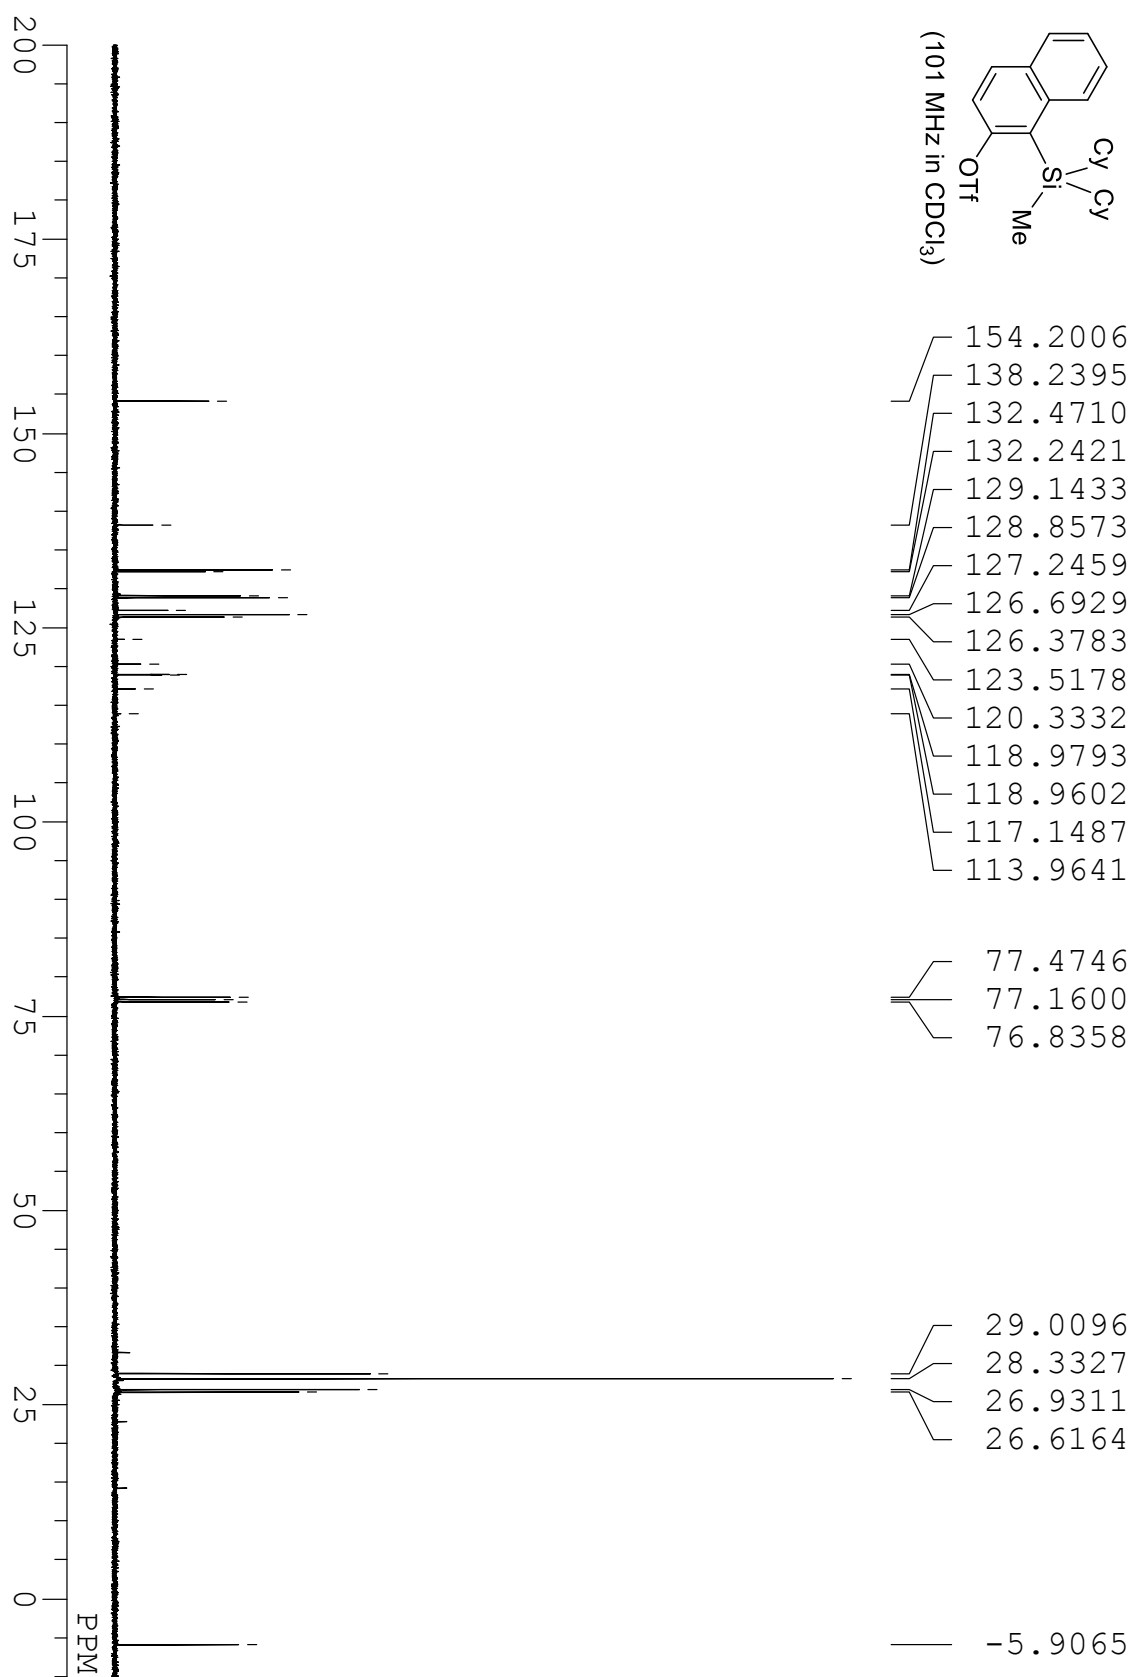

compound **1r**

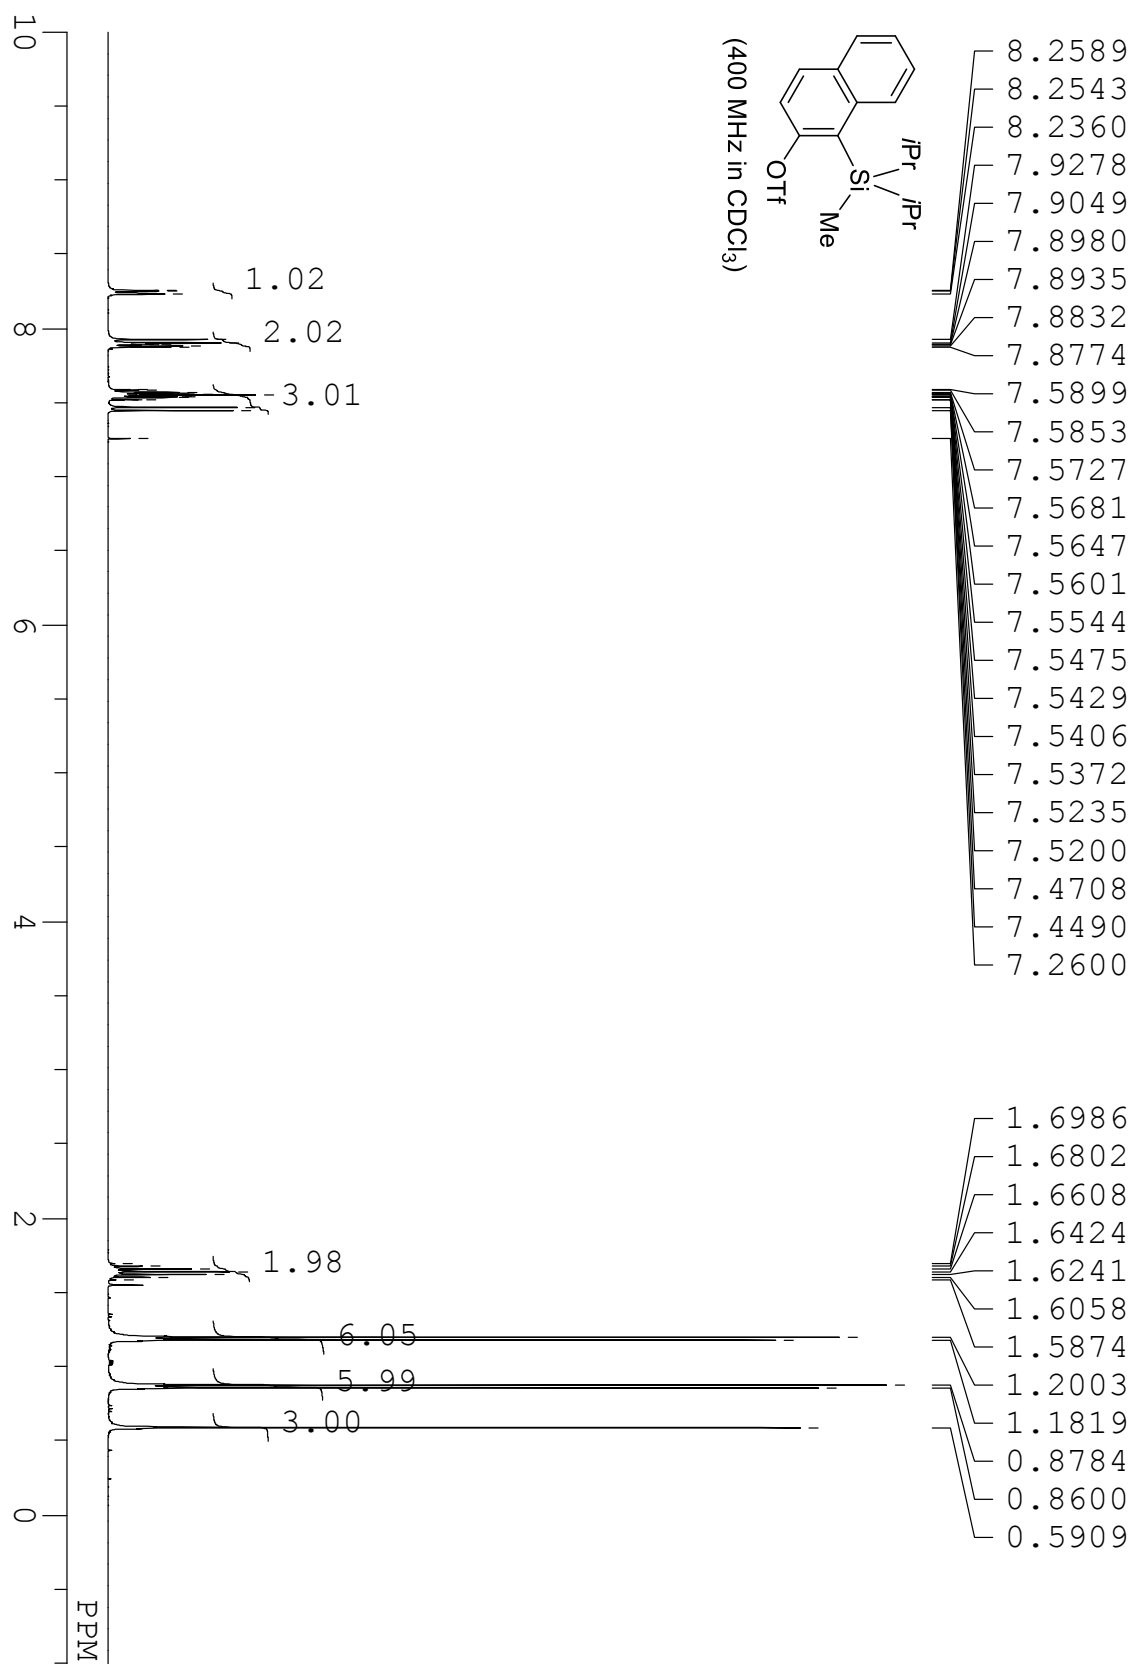

compound 1r

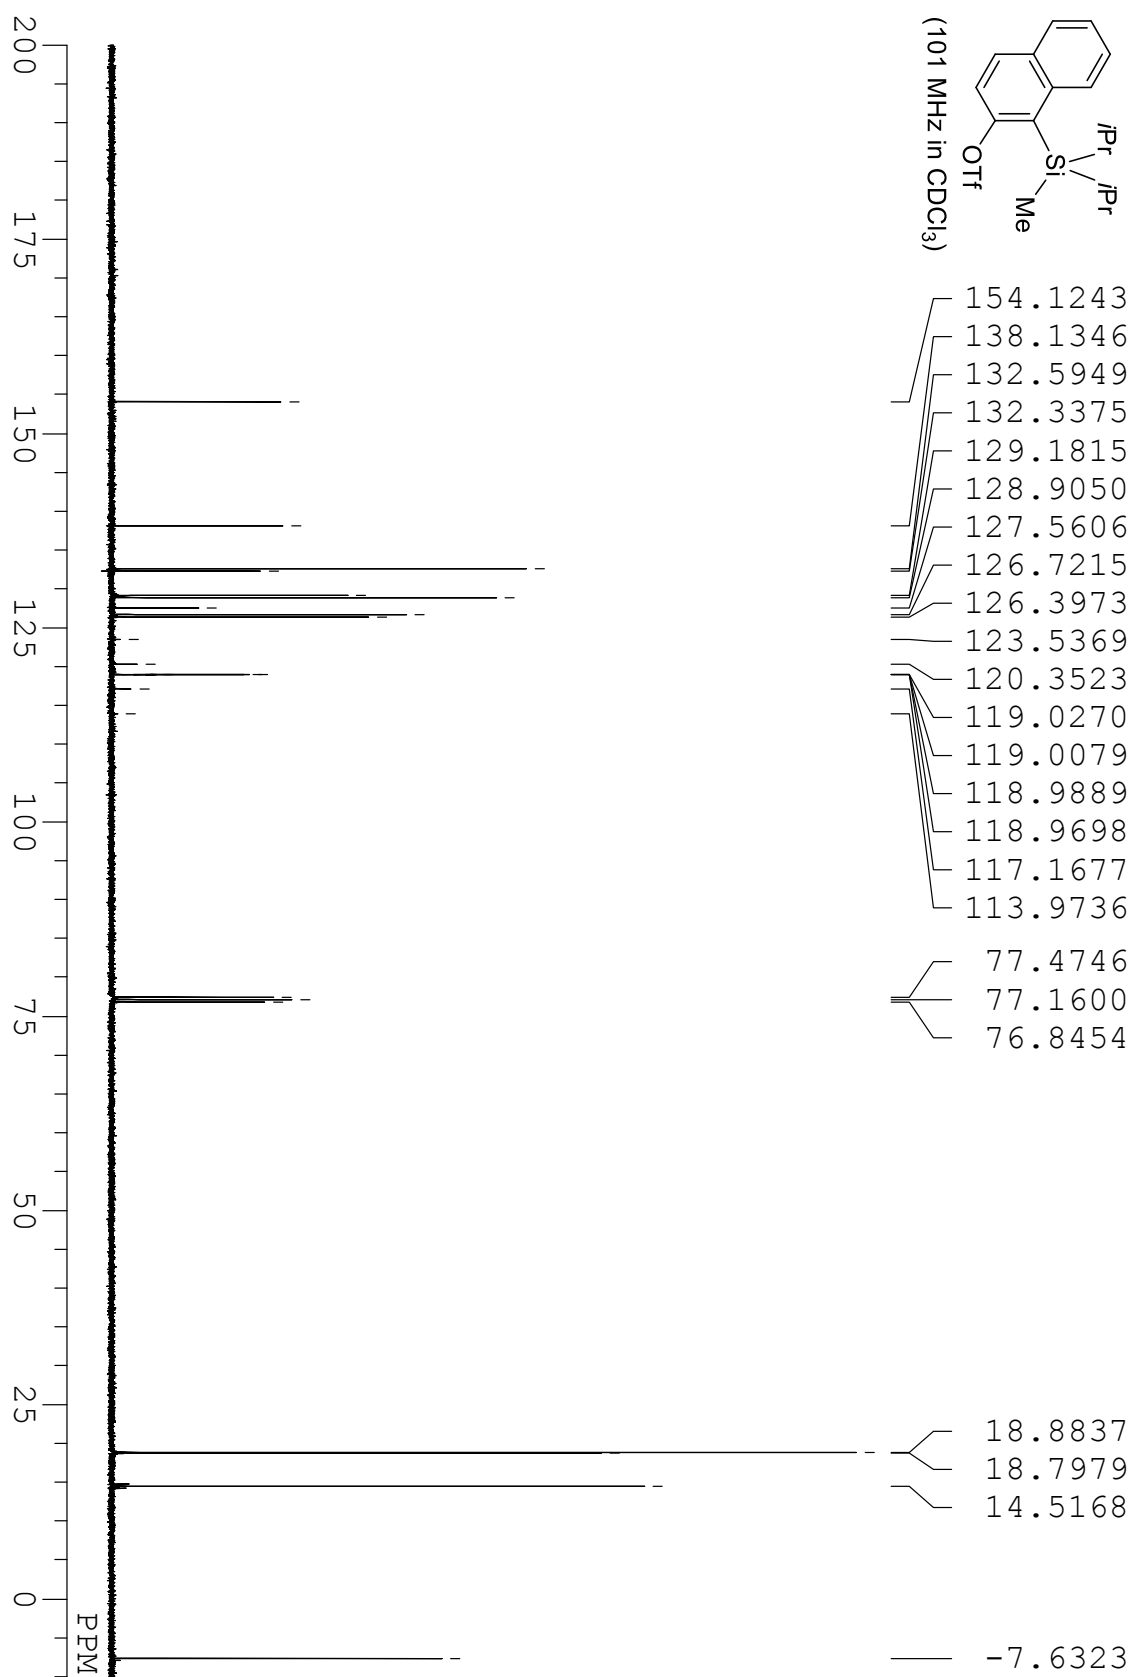

compound **1s**

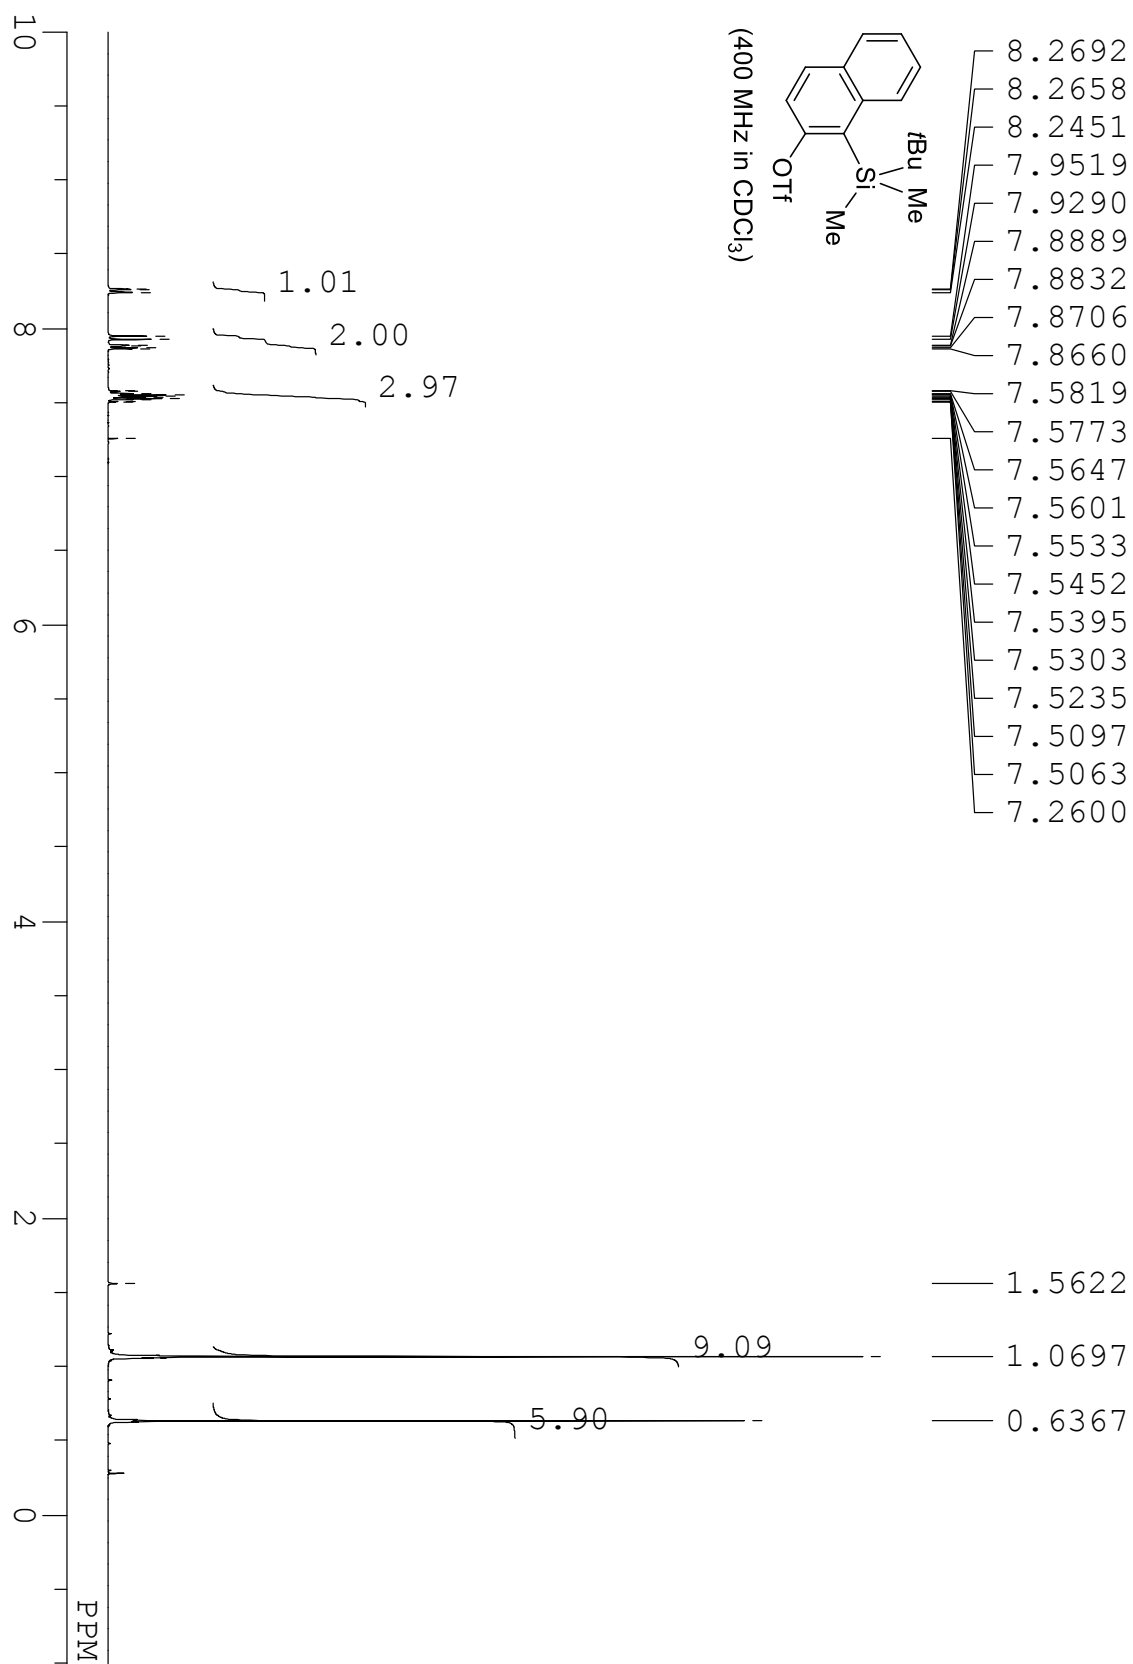

compound 1s

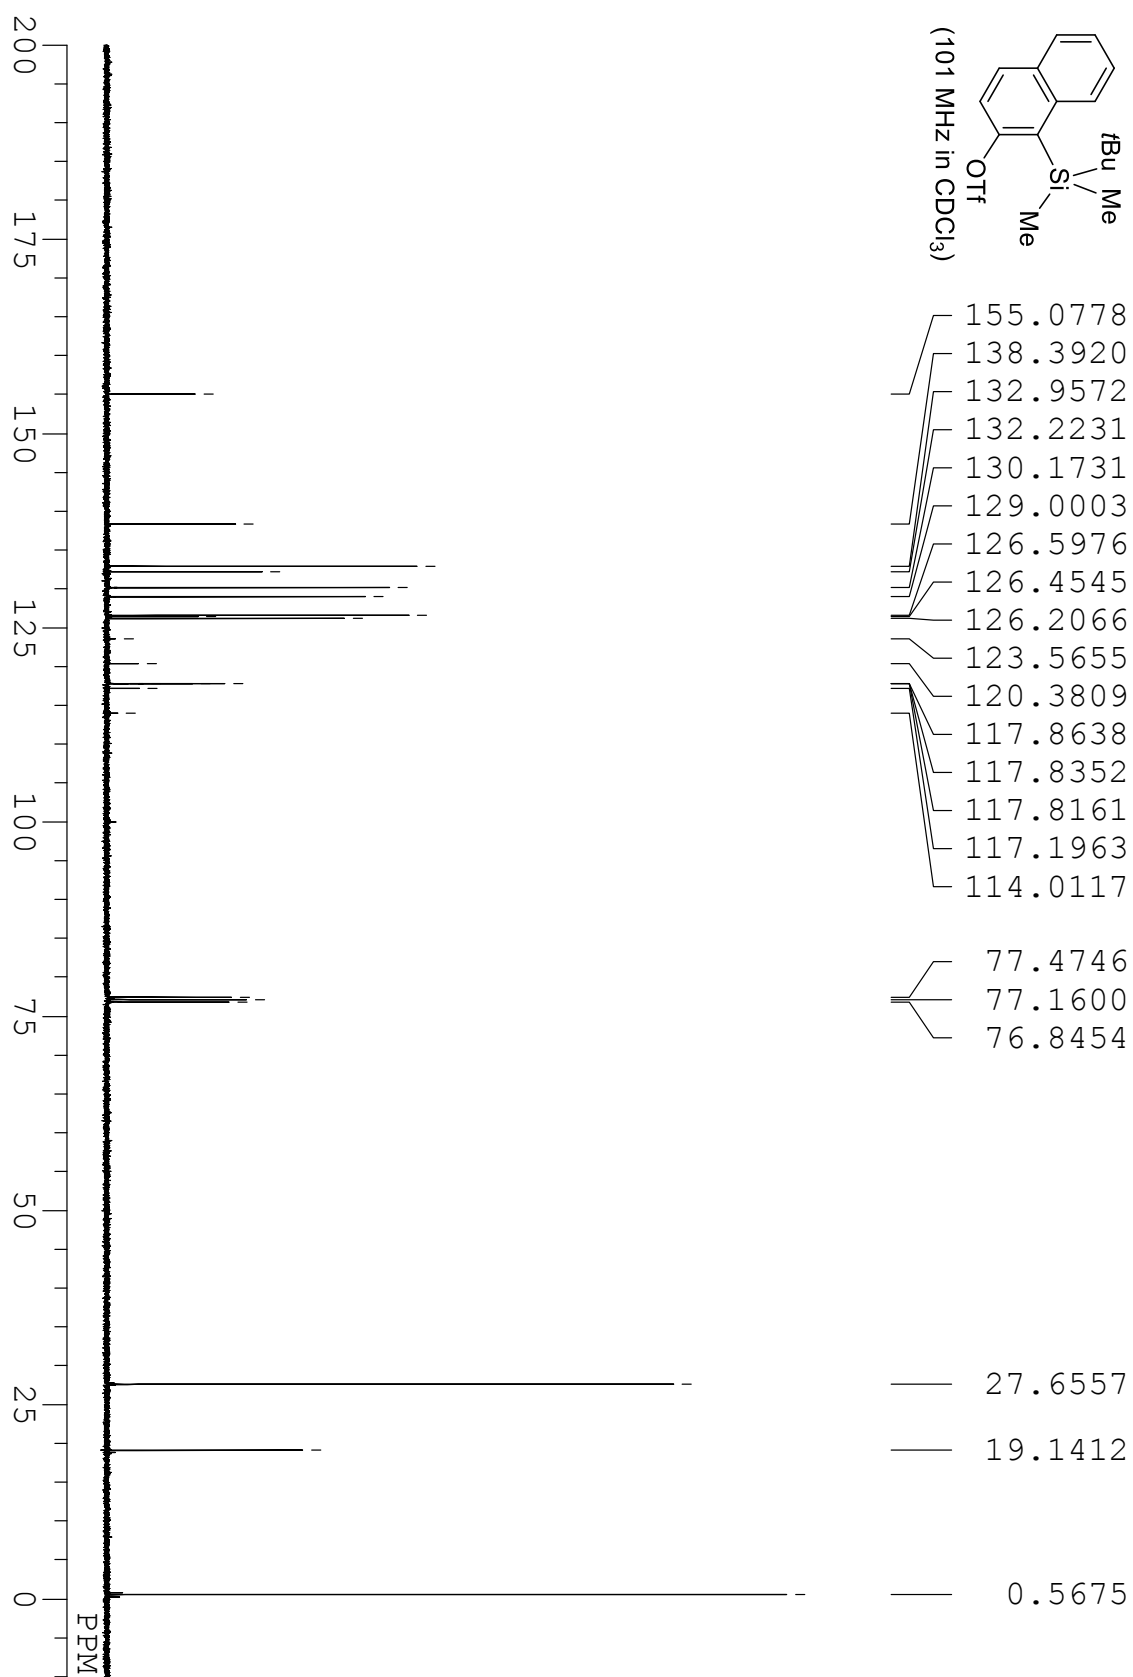

compound **1t**

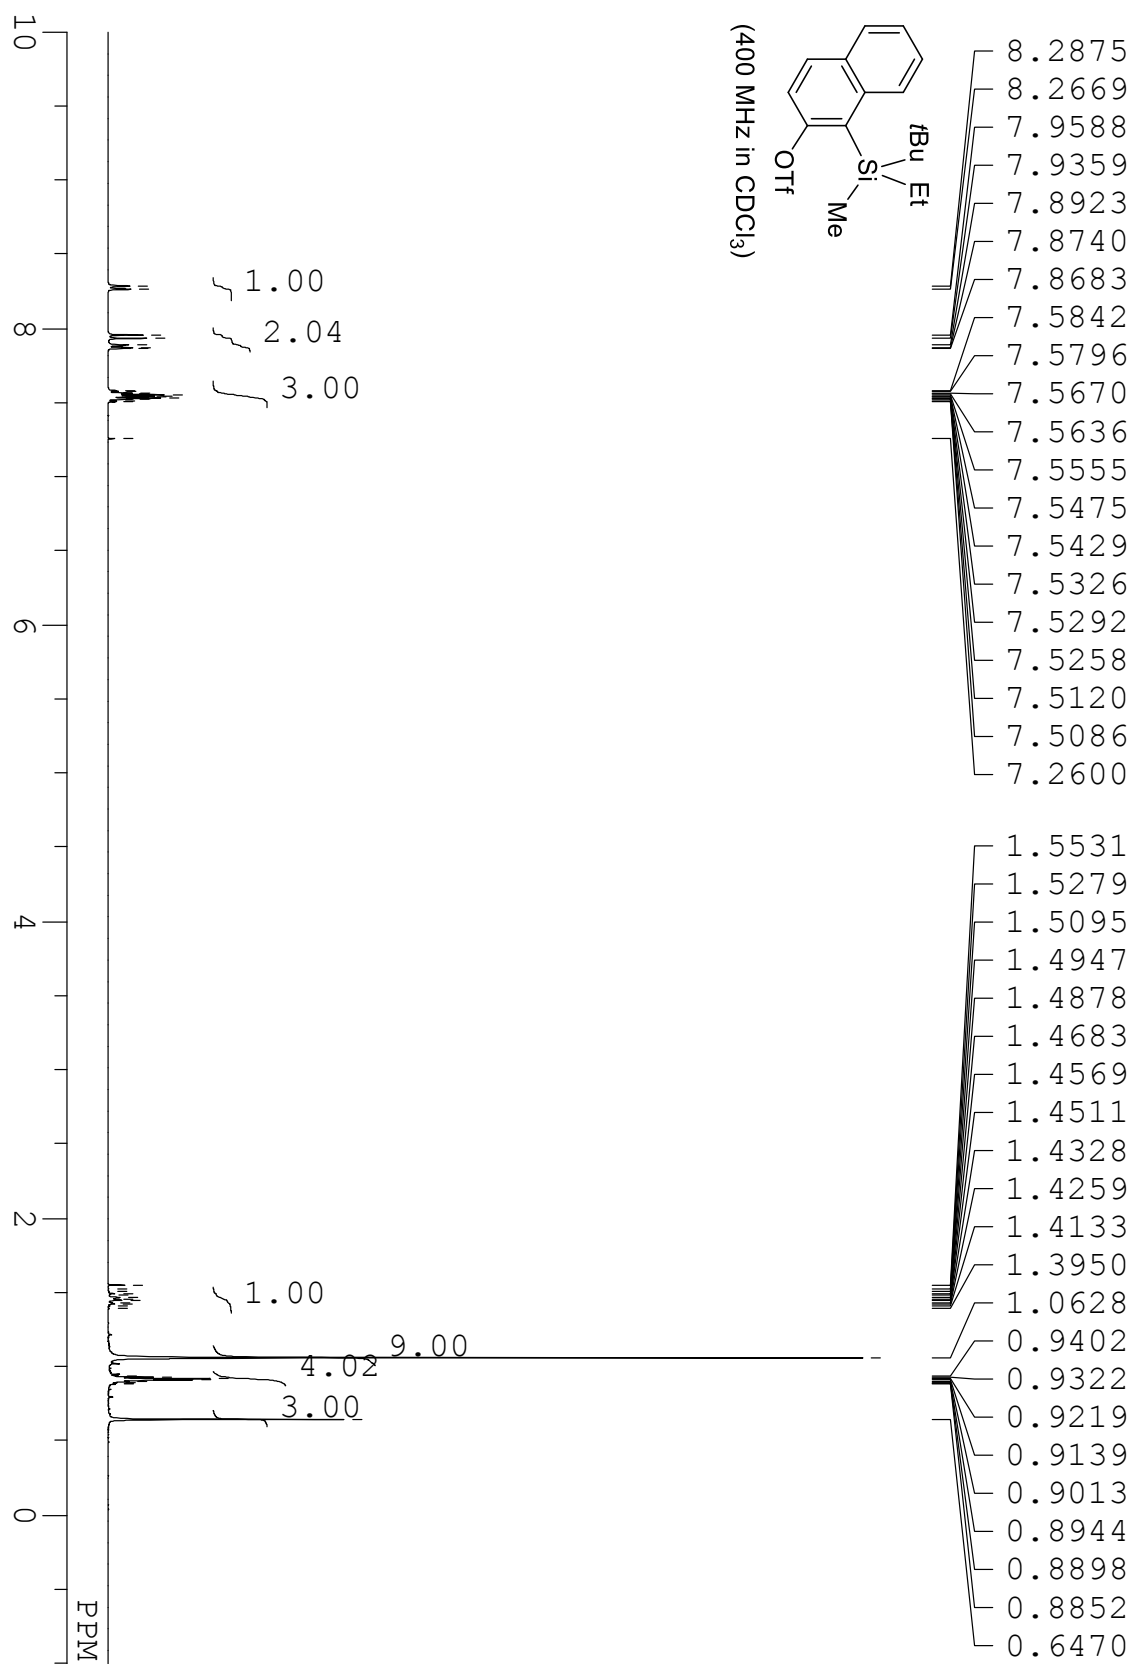

compound **1t**

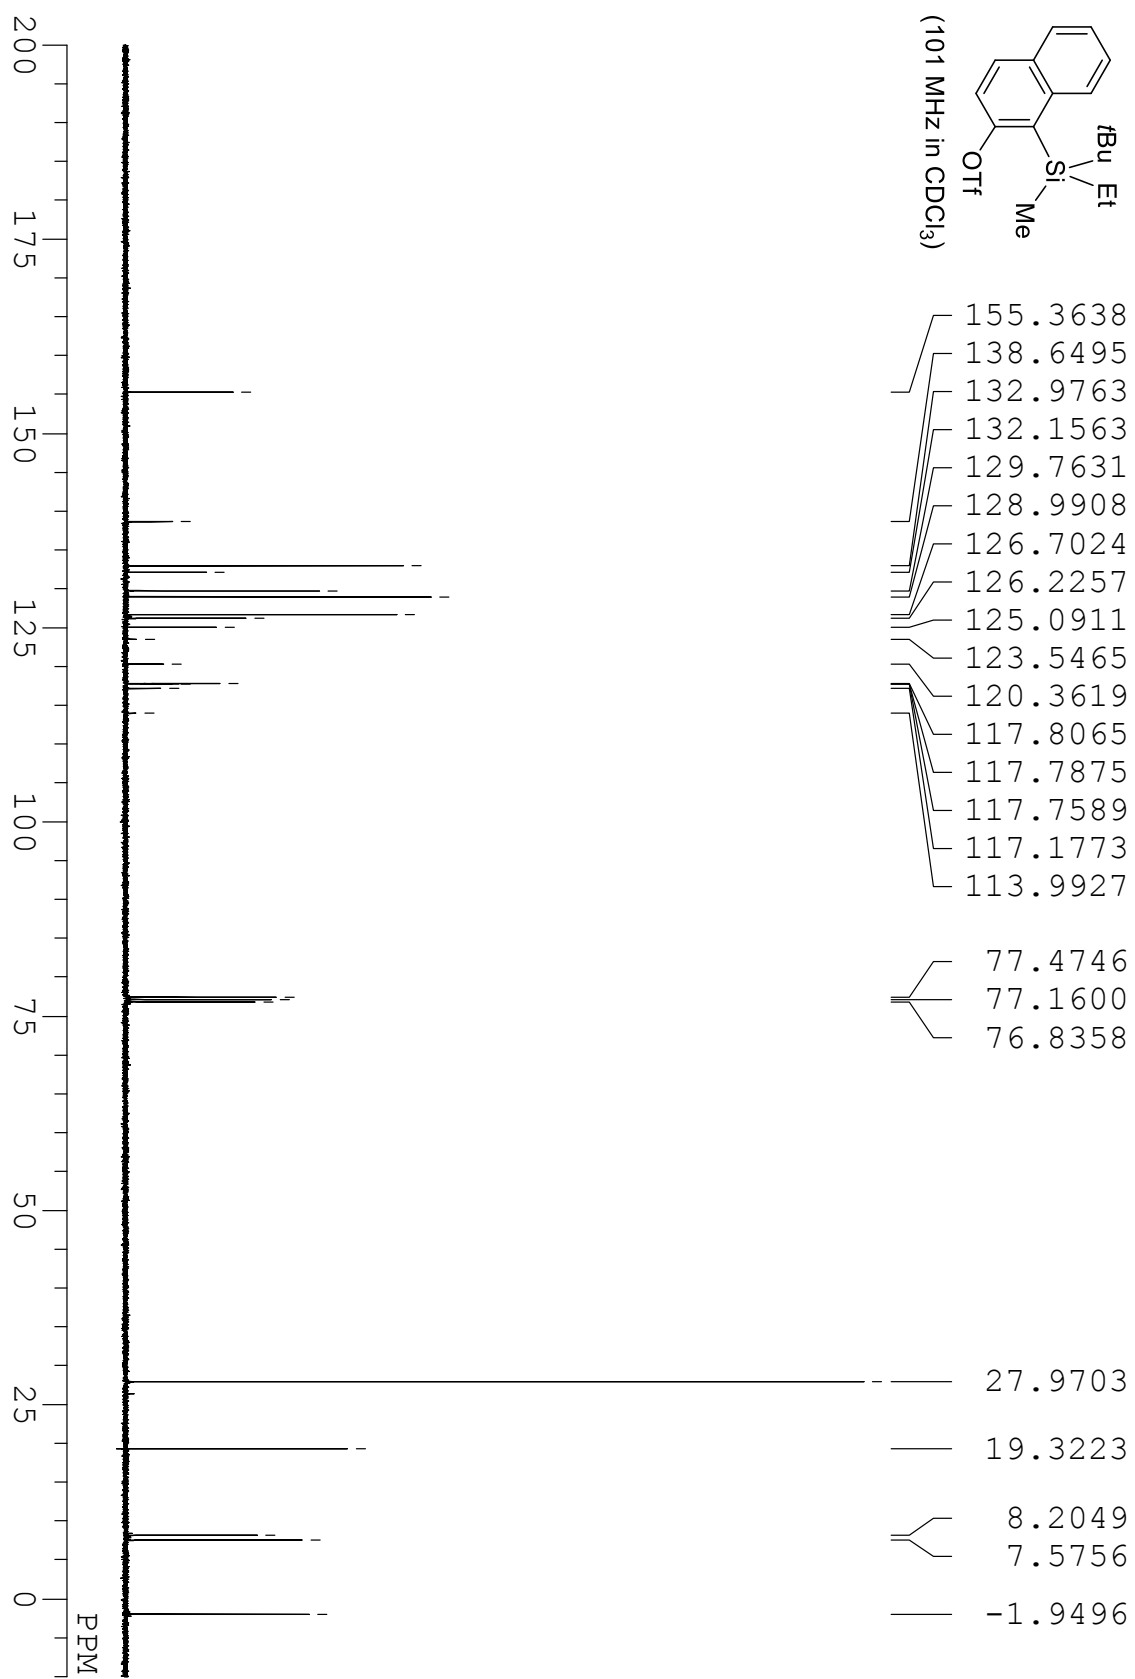



compound **1u**

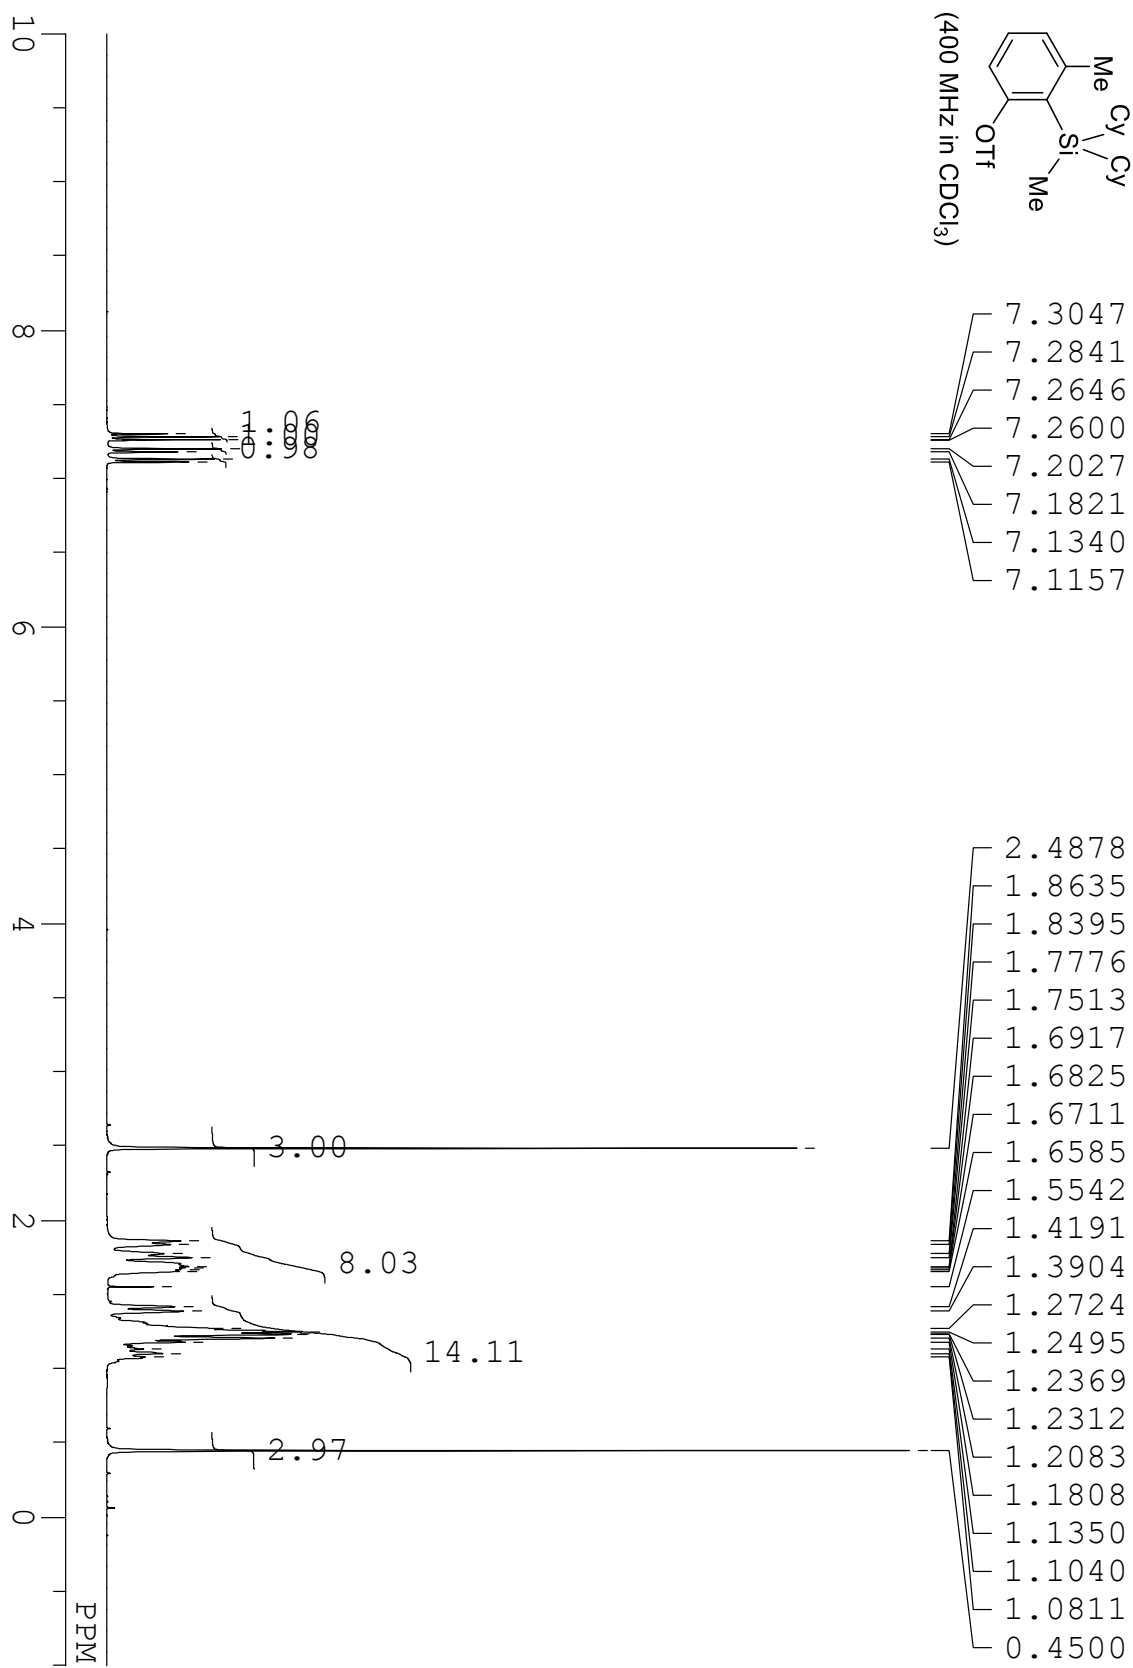

compound **1u**

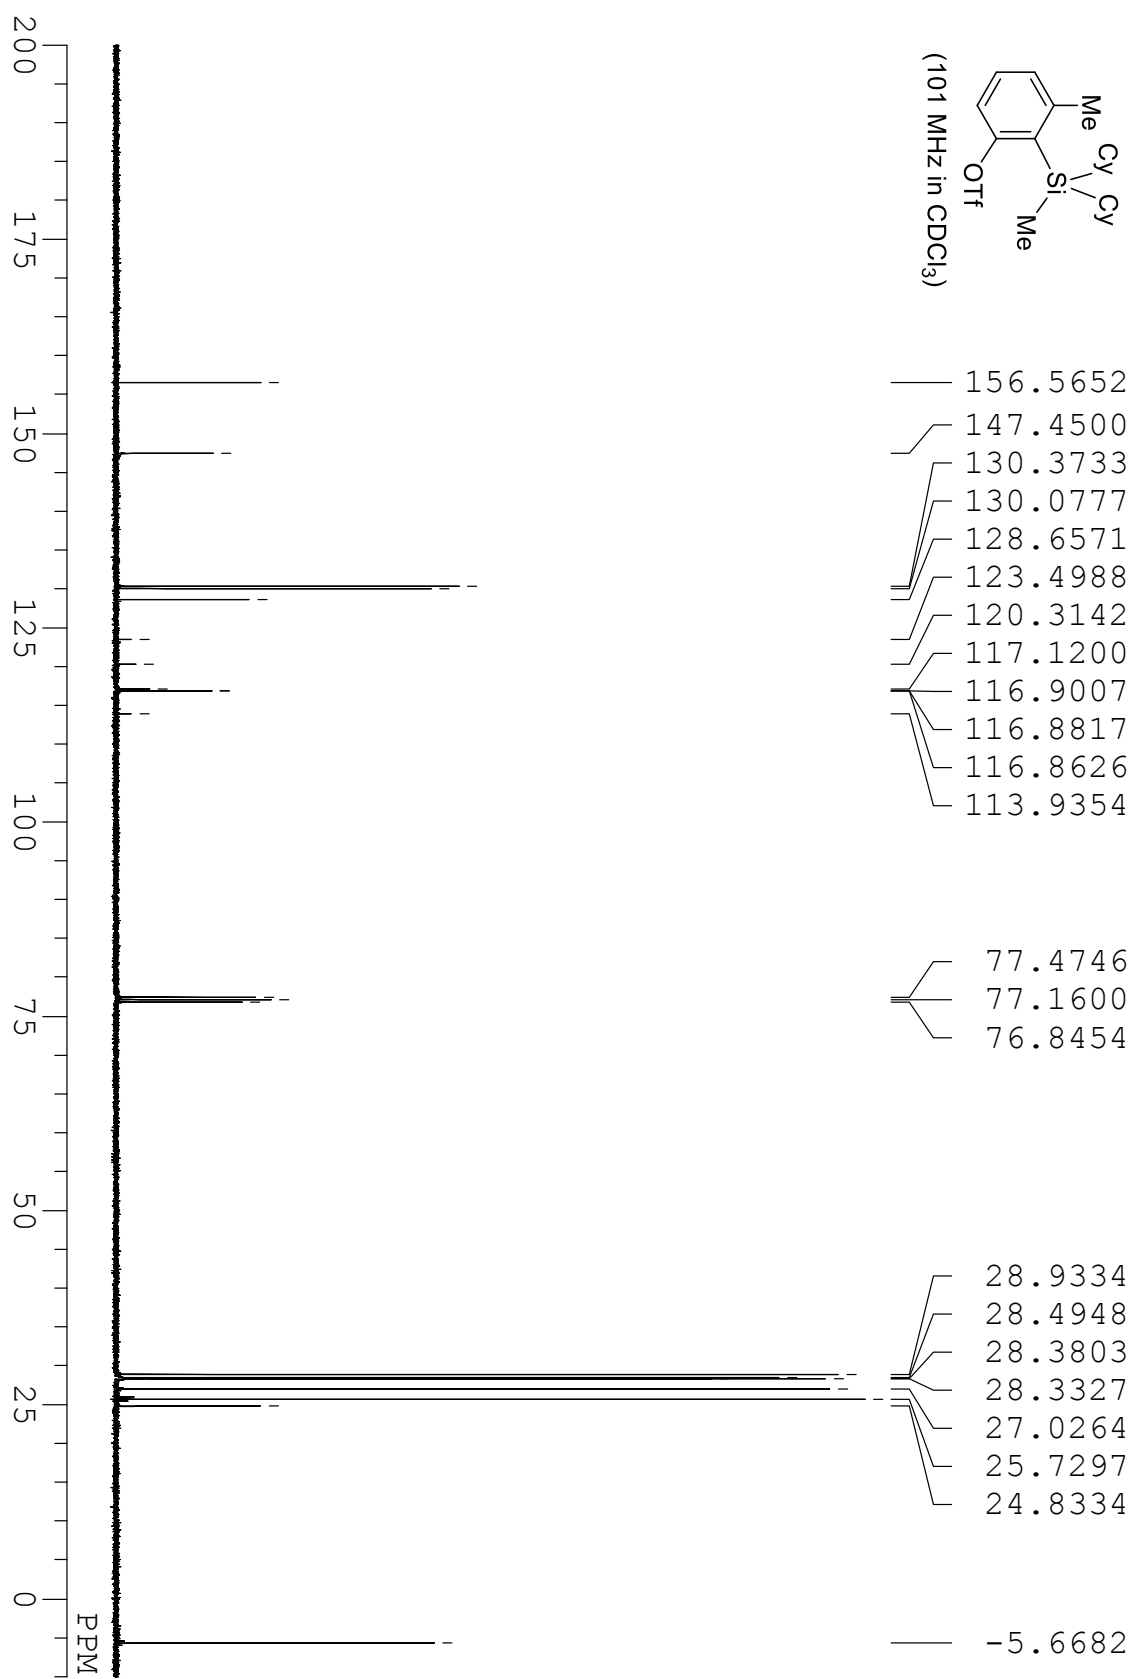

compound 1v

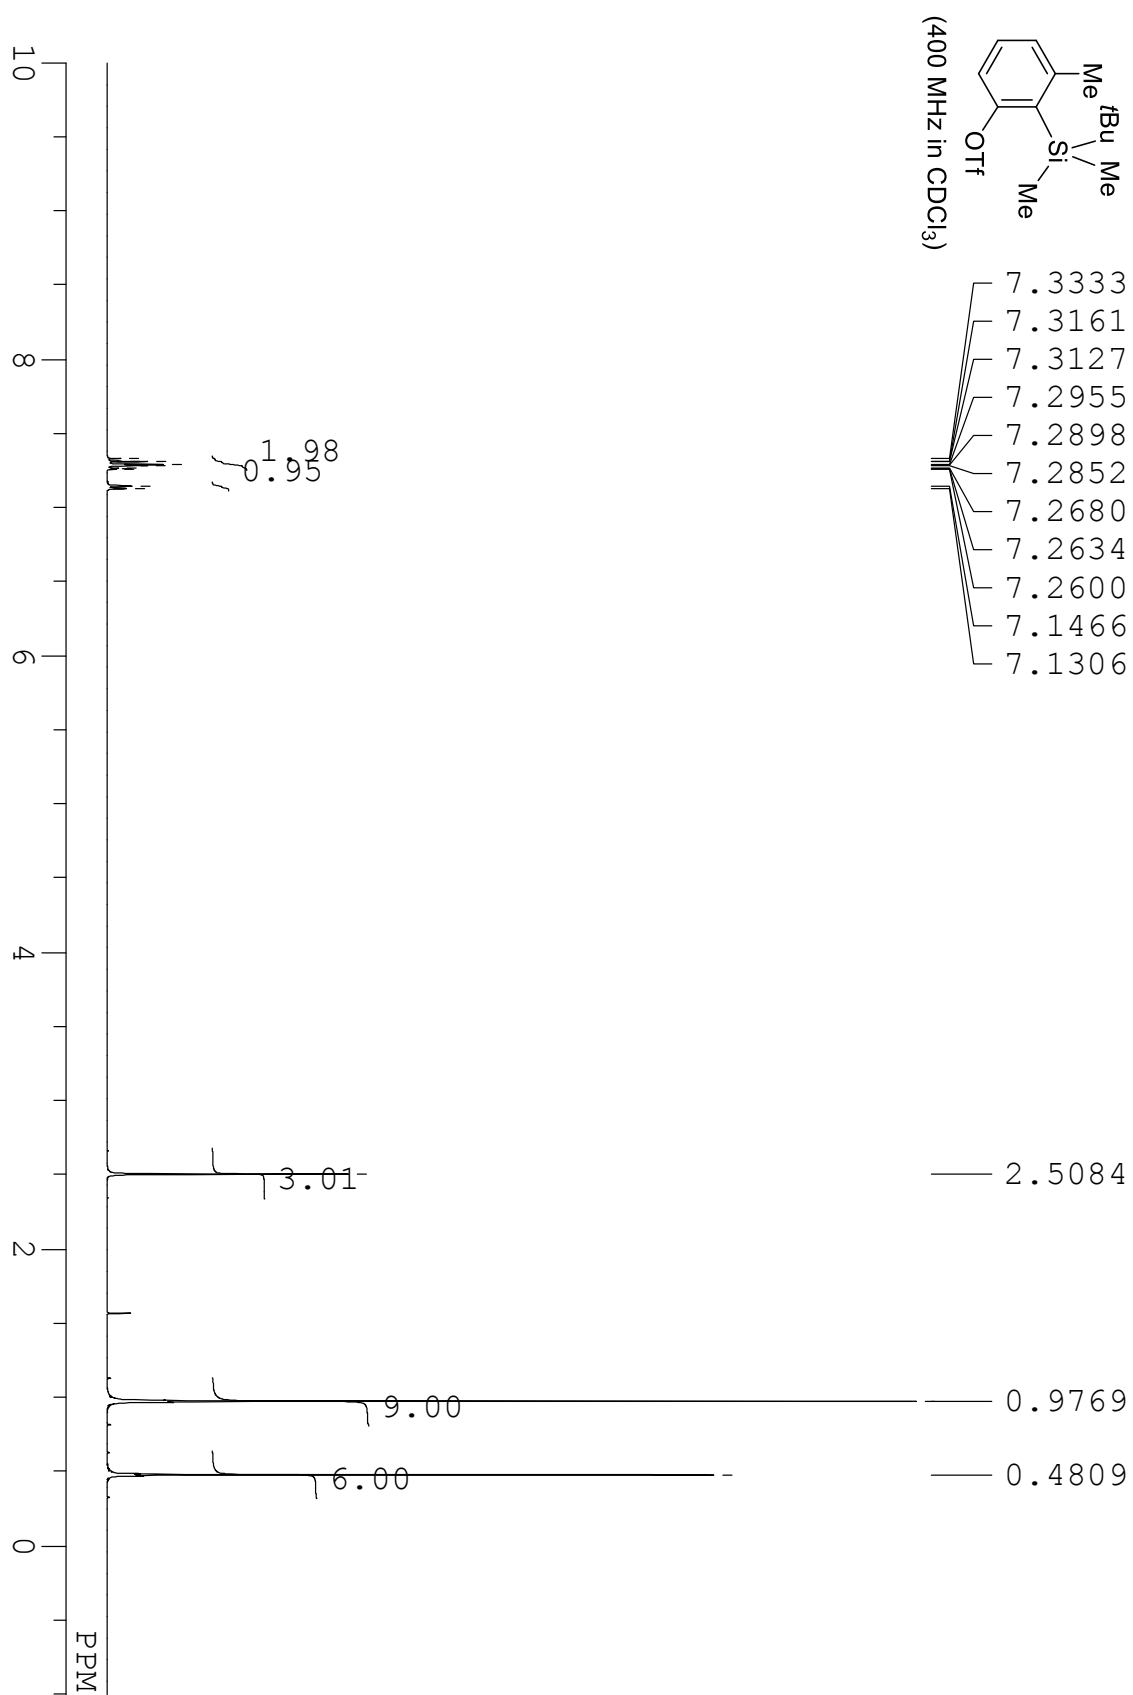

compound 1v

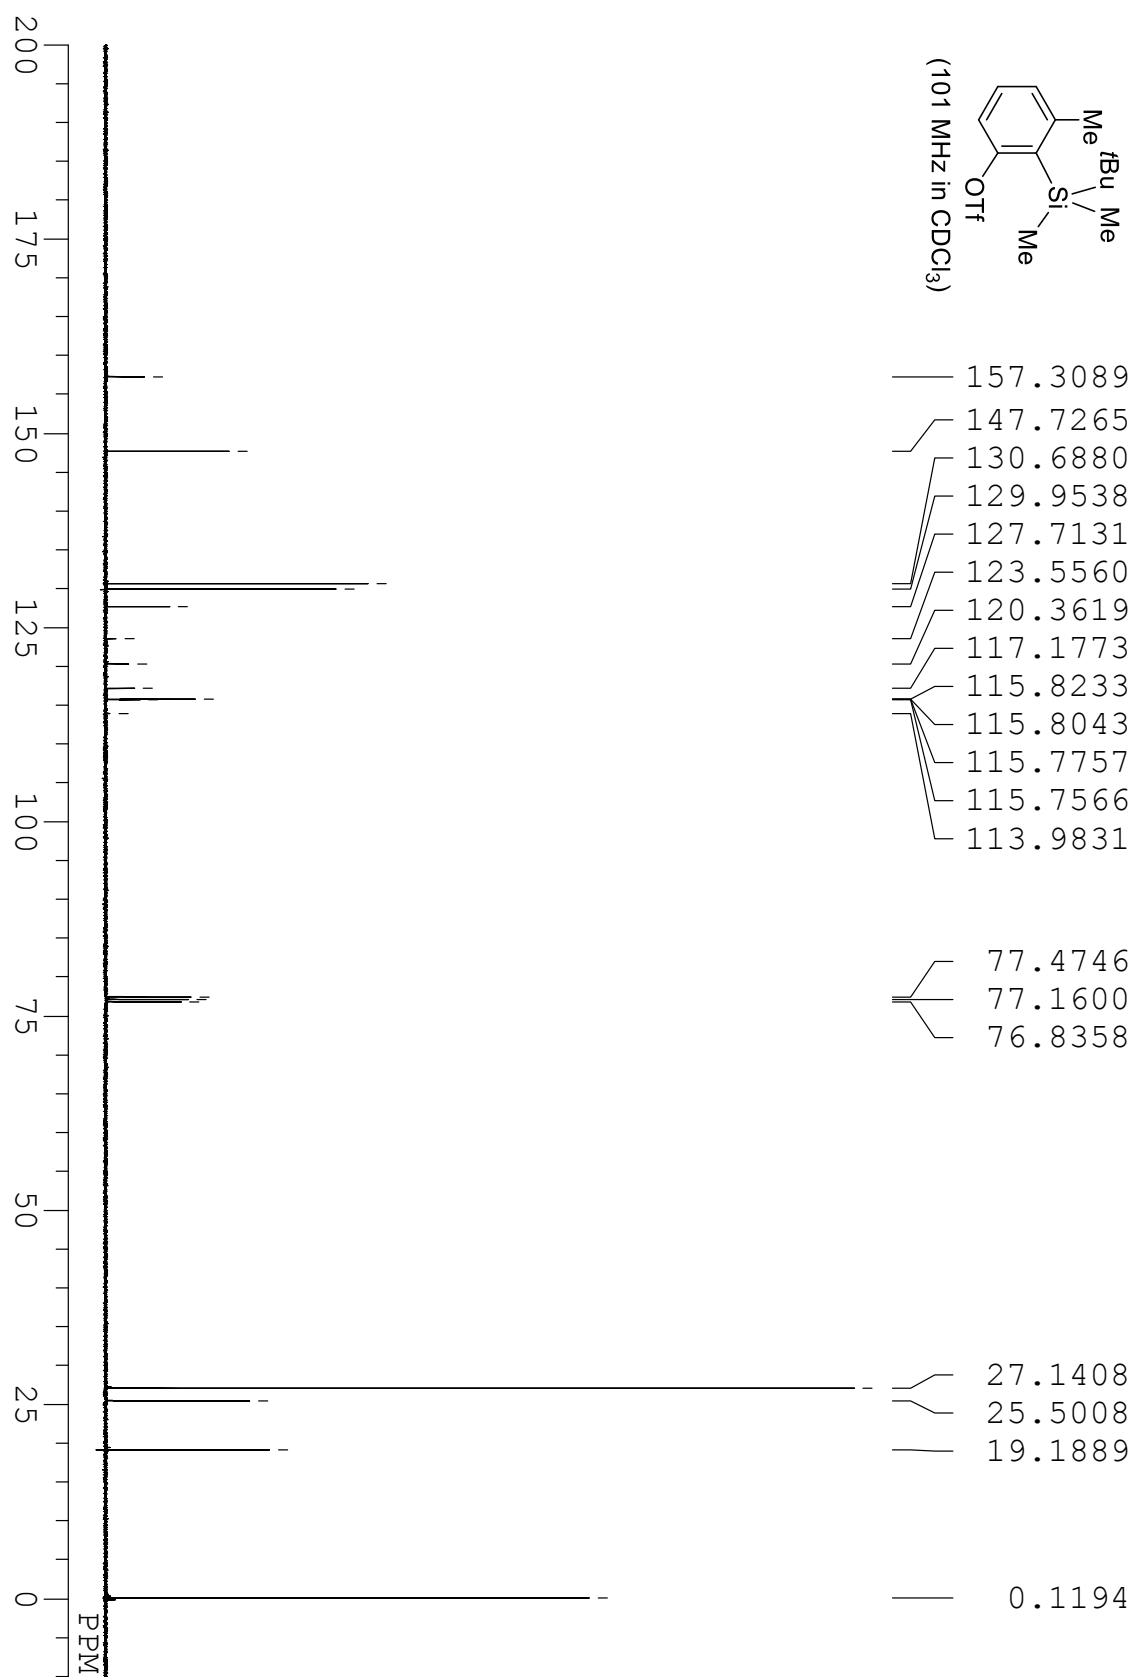

compound **2a** (97% pure)

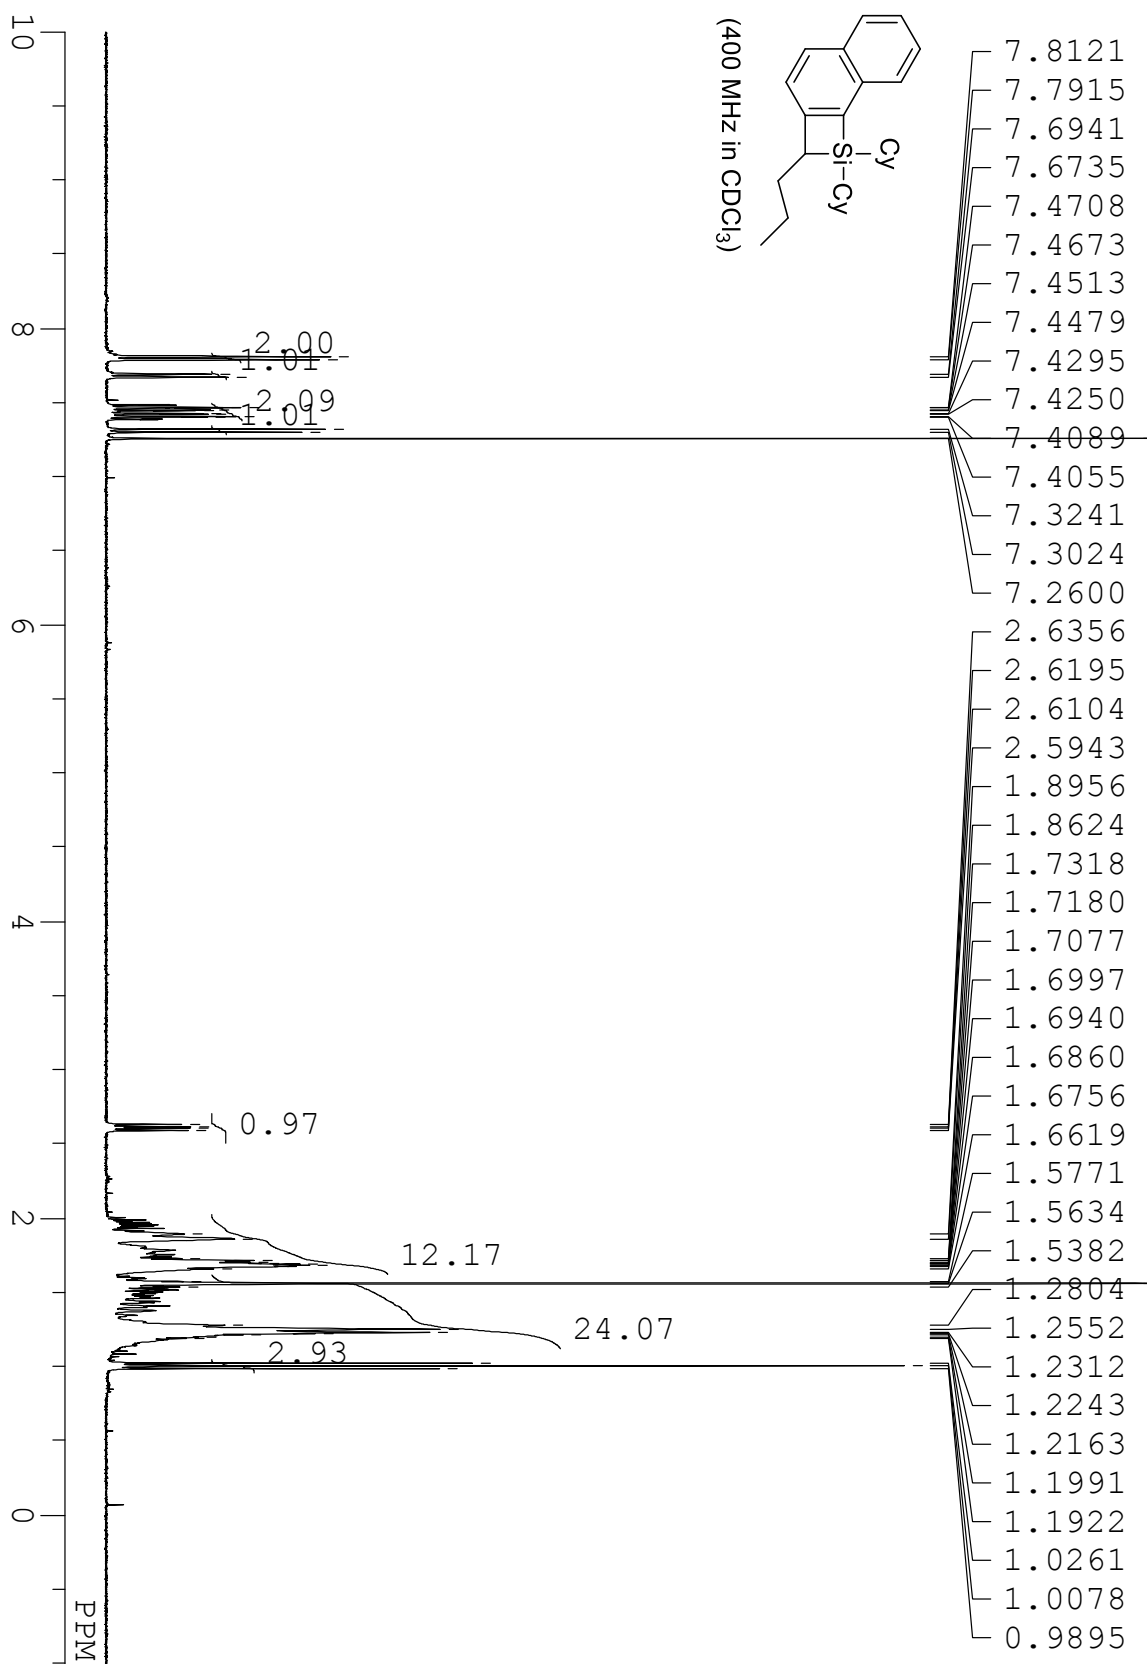

compound **2a** (97% pure)

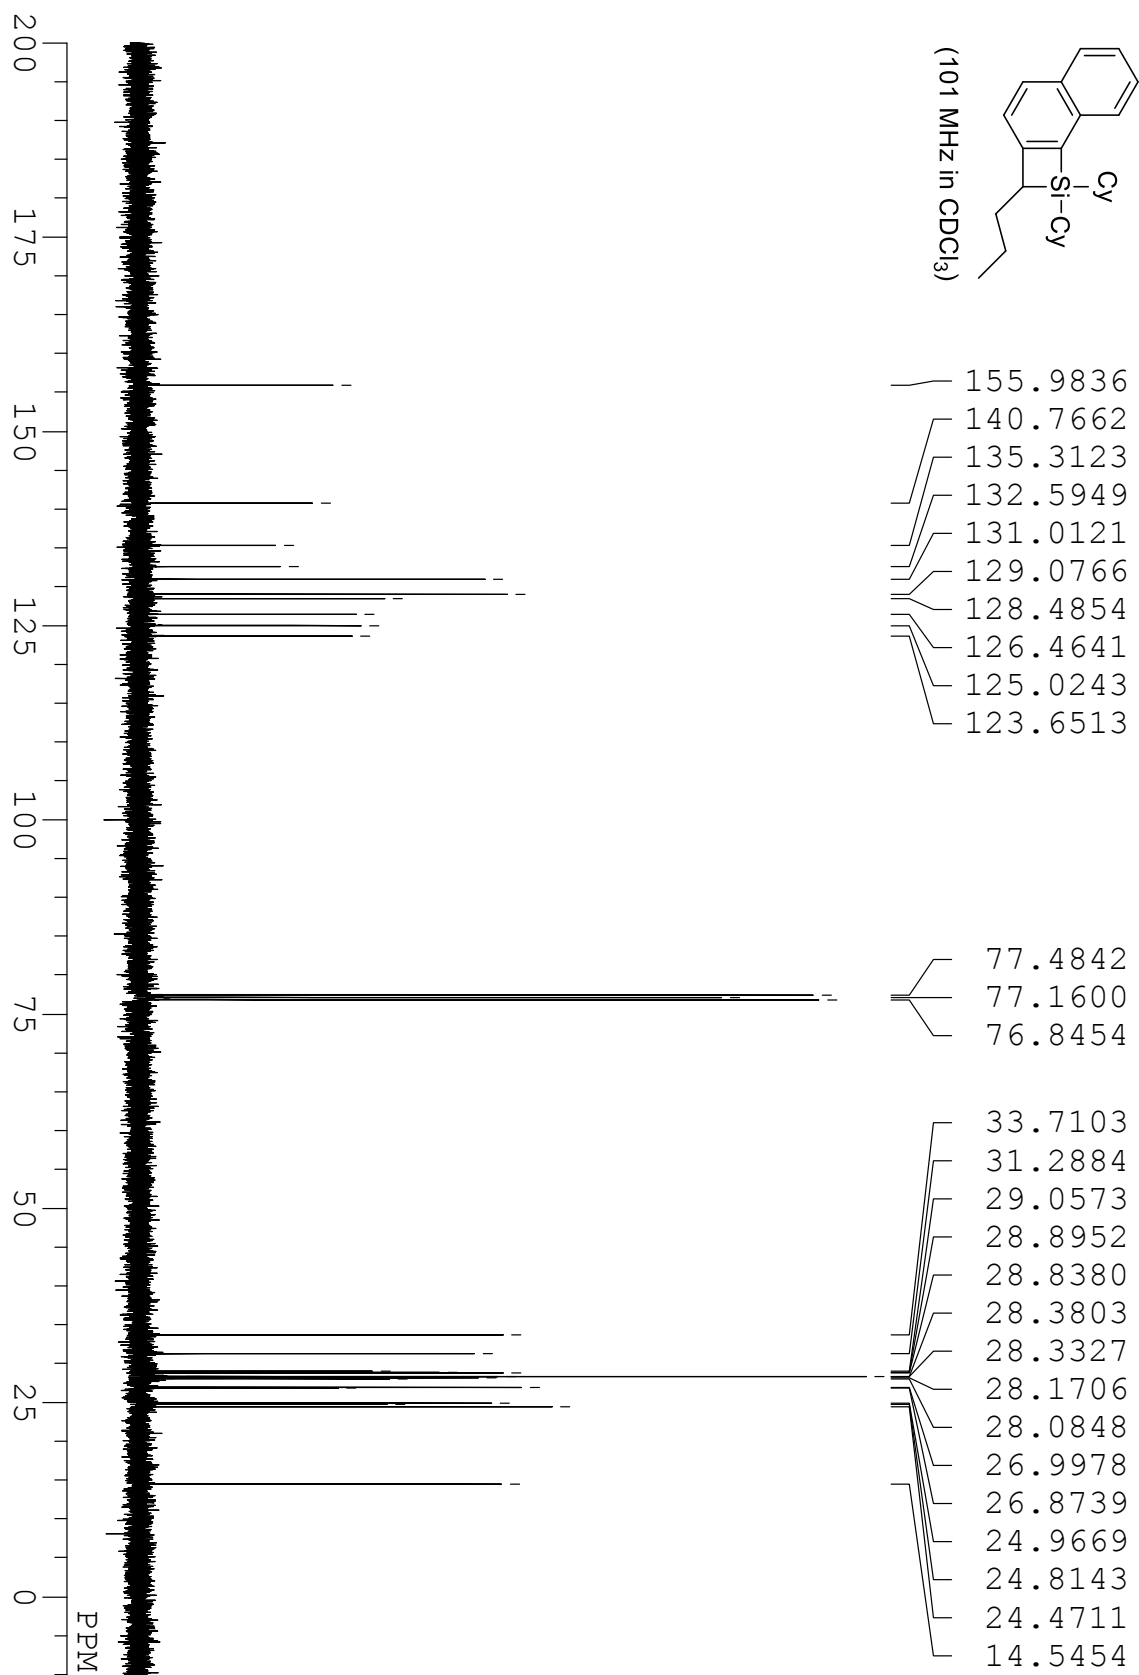

compound **2b** (99% pure)

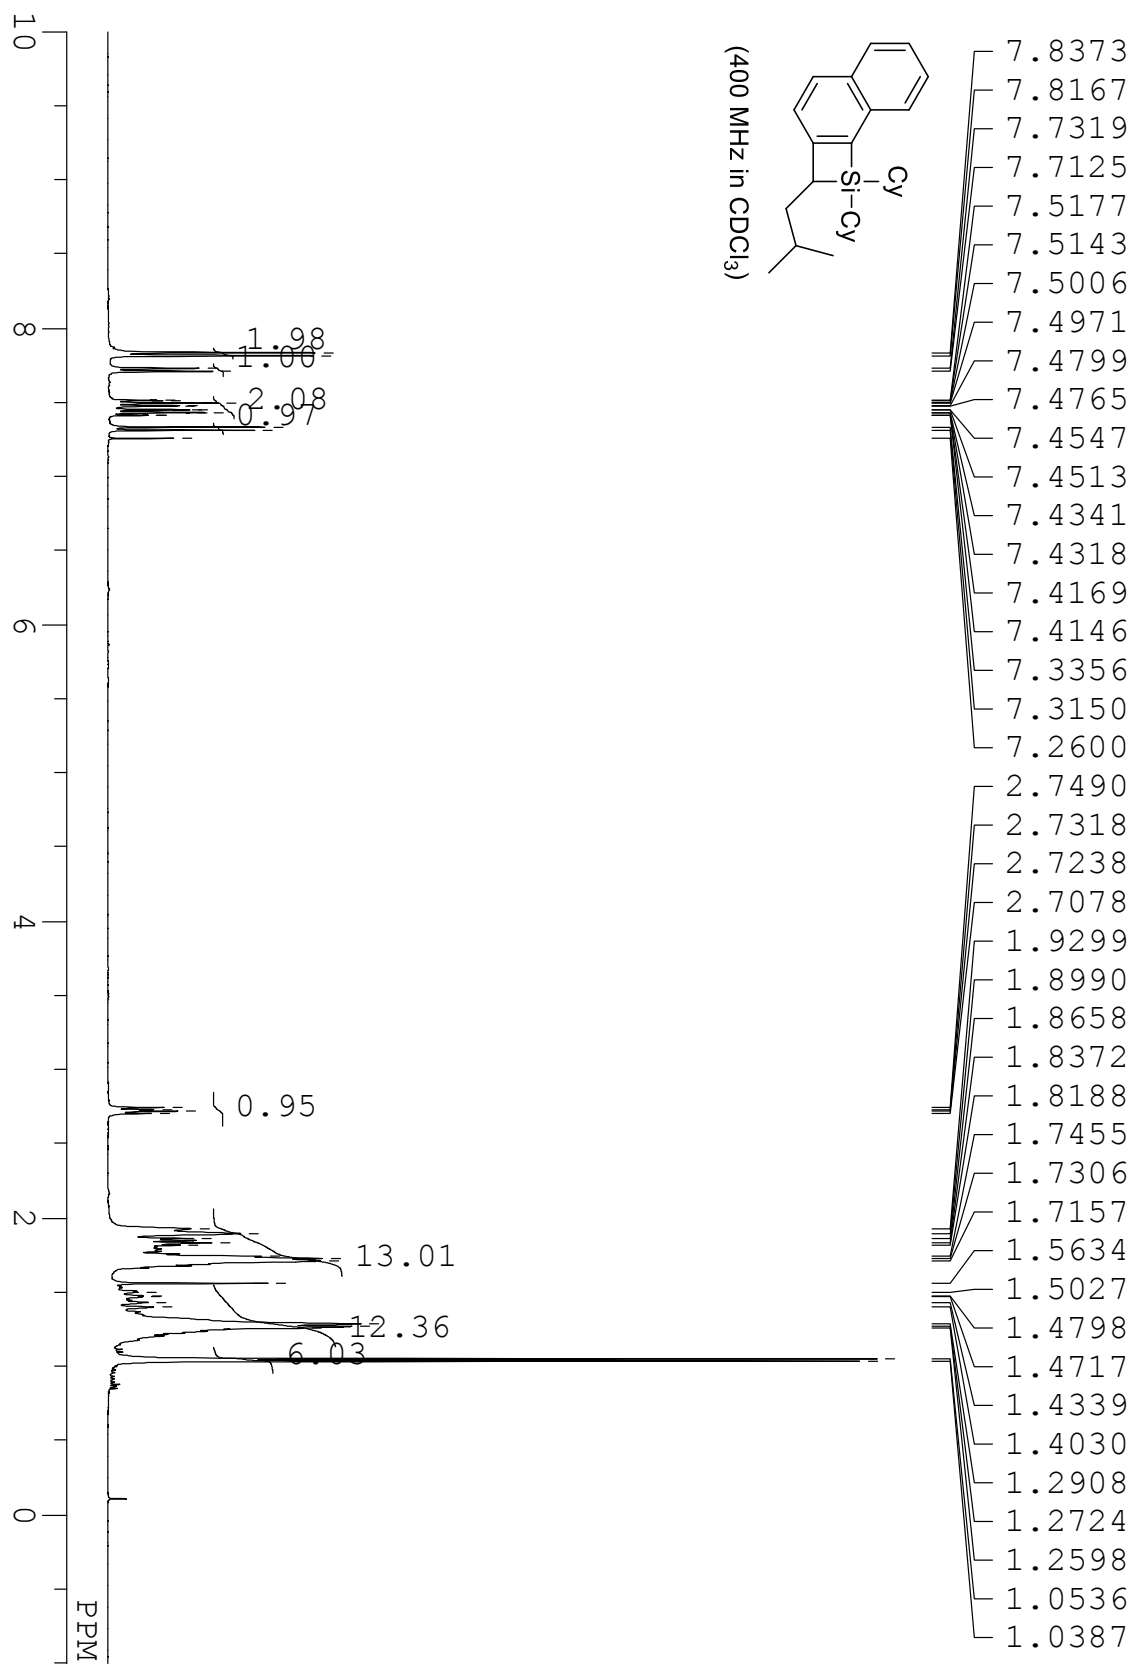

compound **2b** (99% pure)

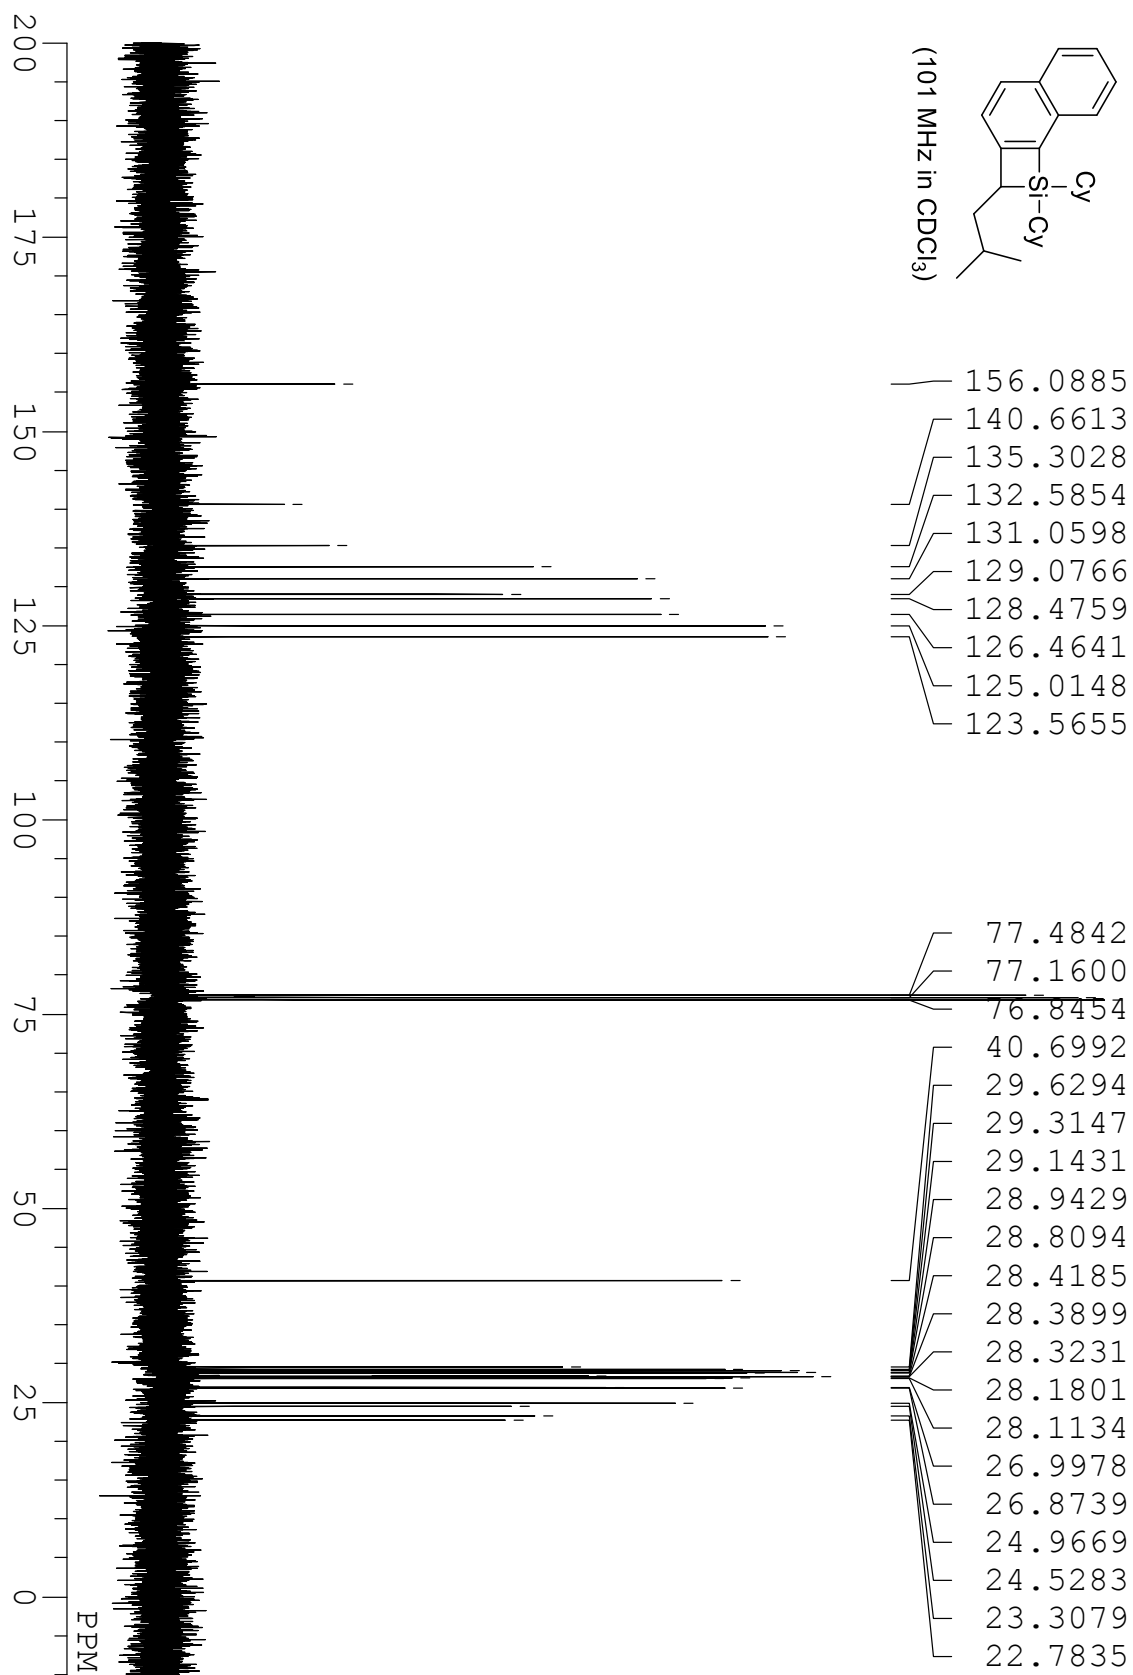



compound **2c** (96% pure)

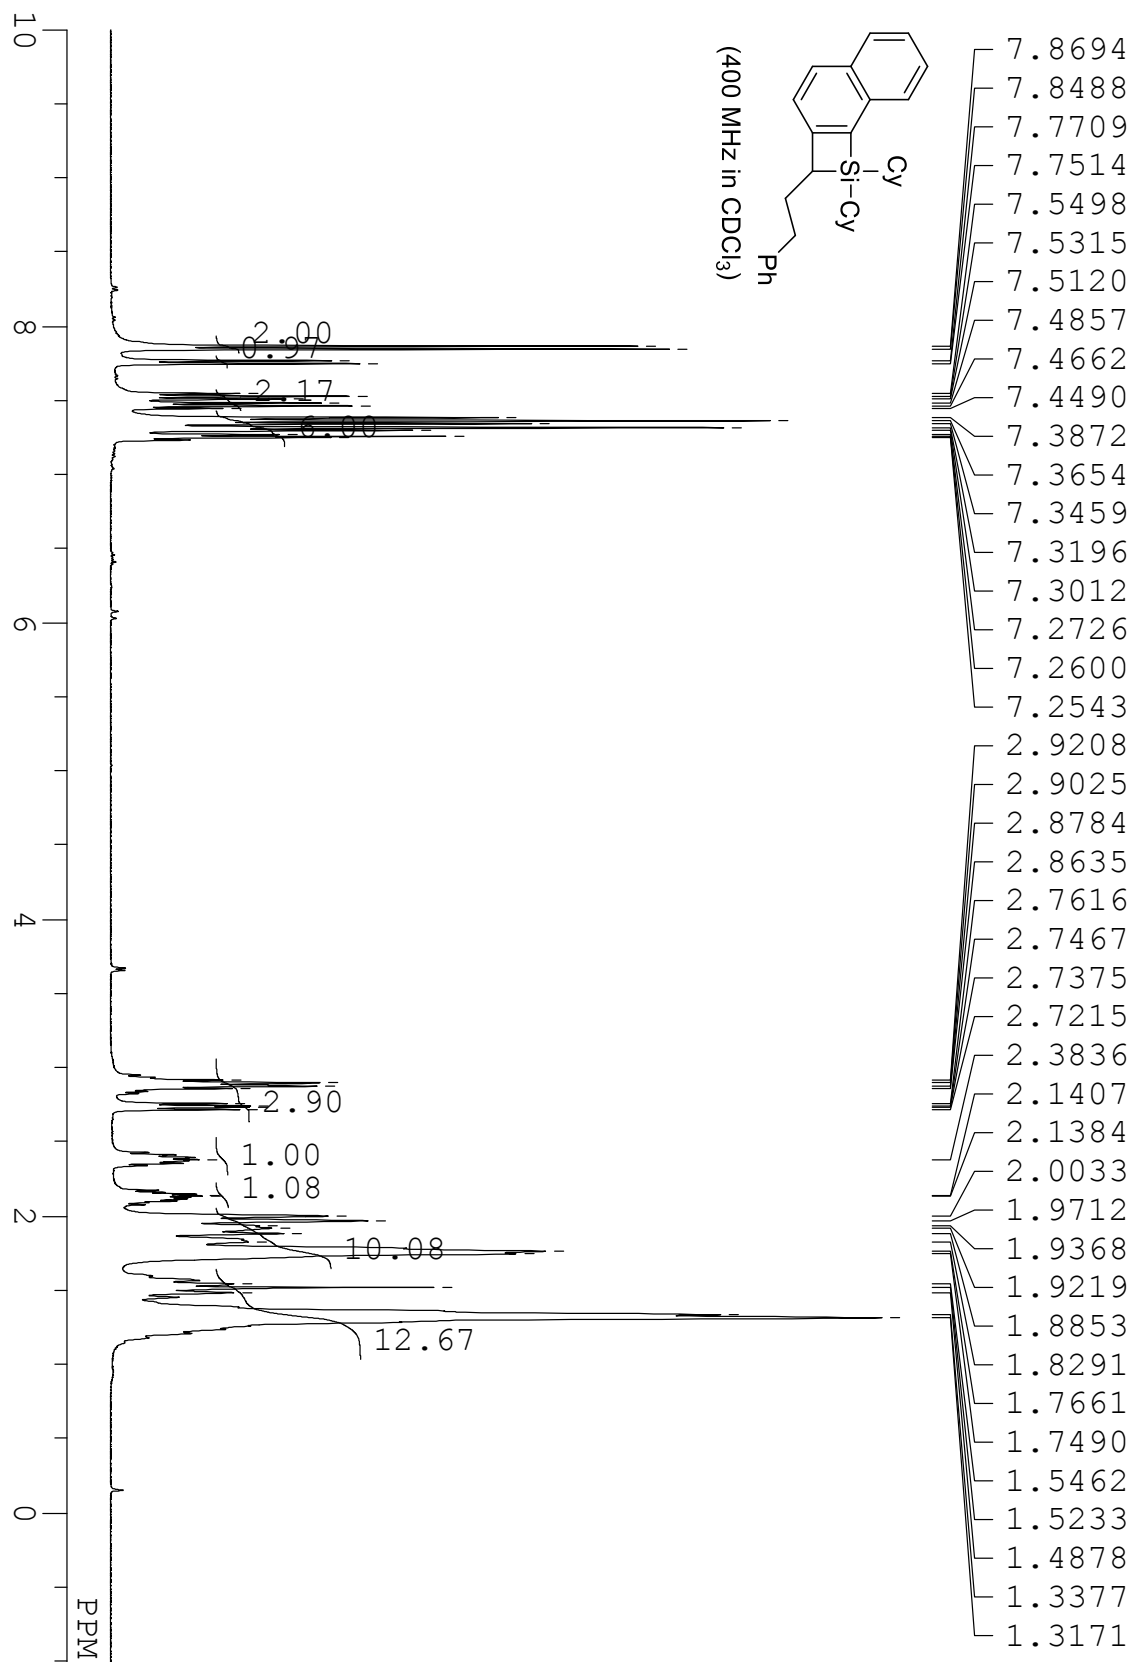

compound **2c** (96% pure)

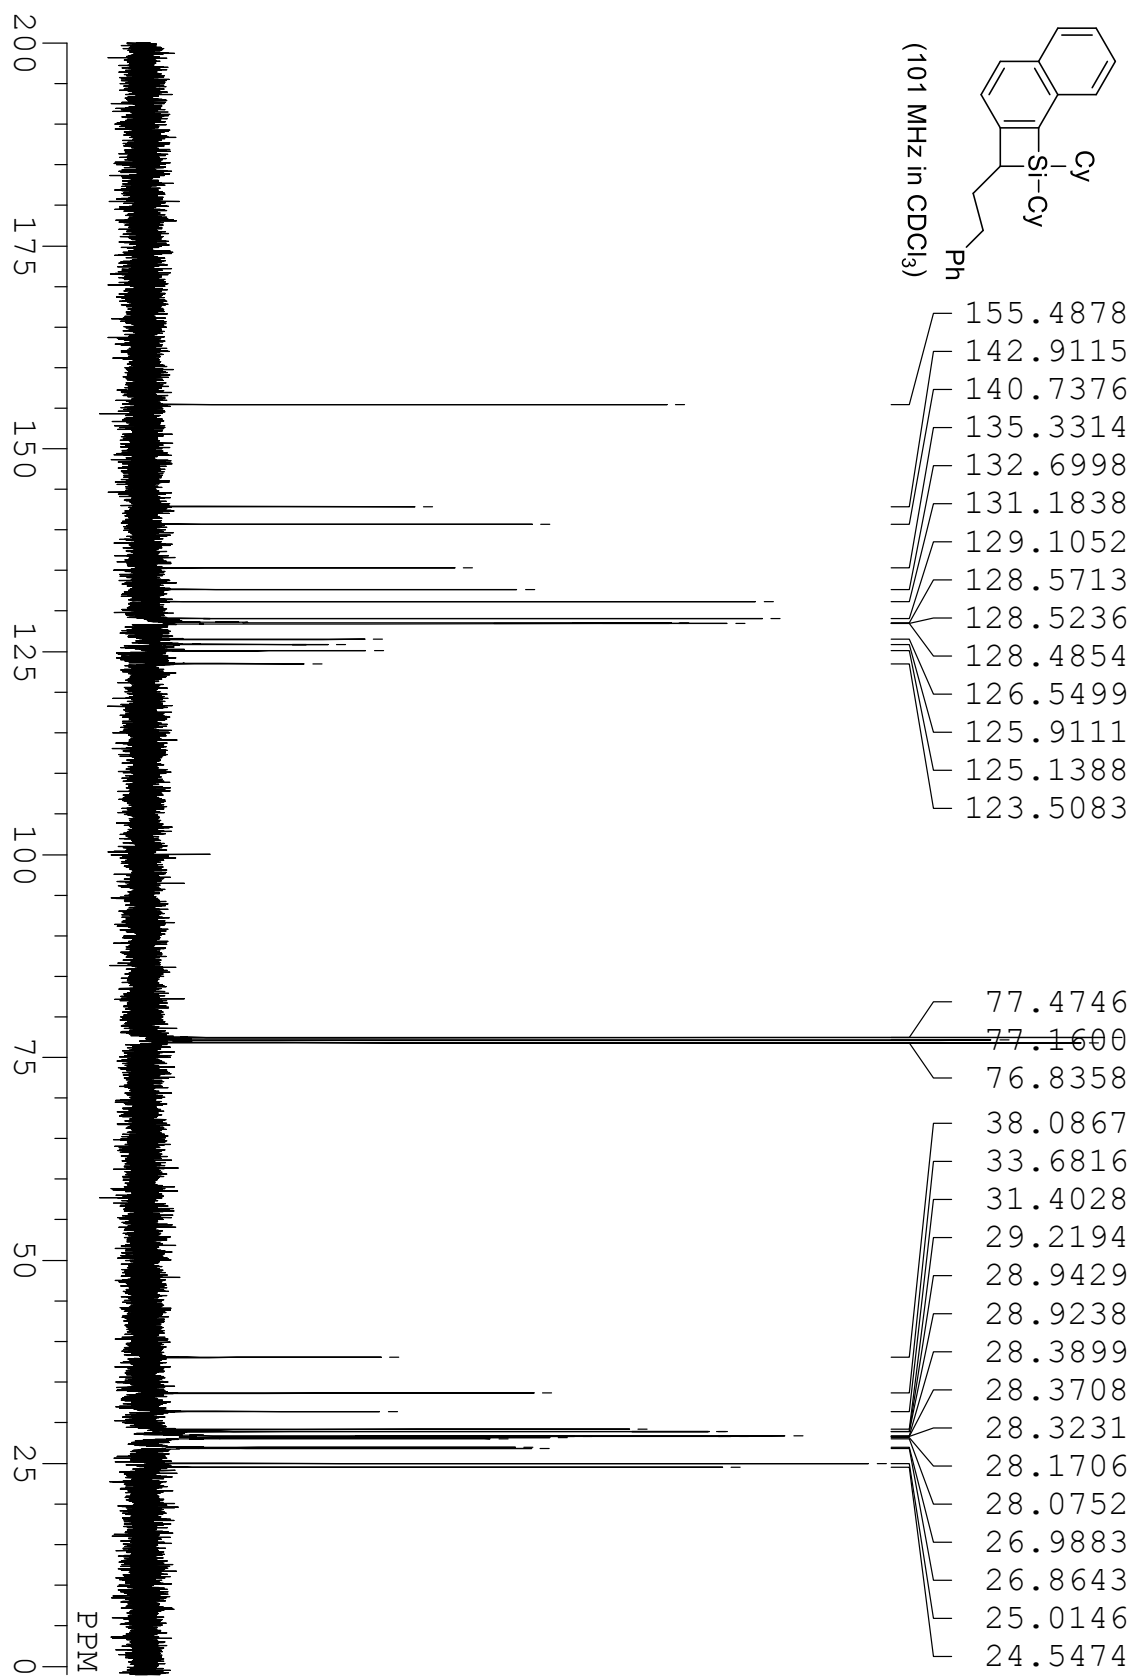

compound **2d** (96% pure)

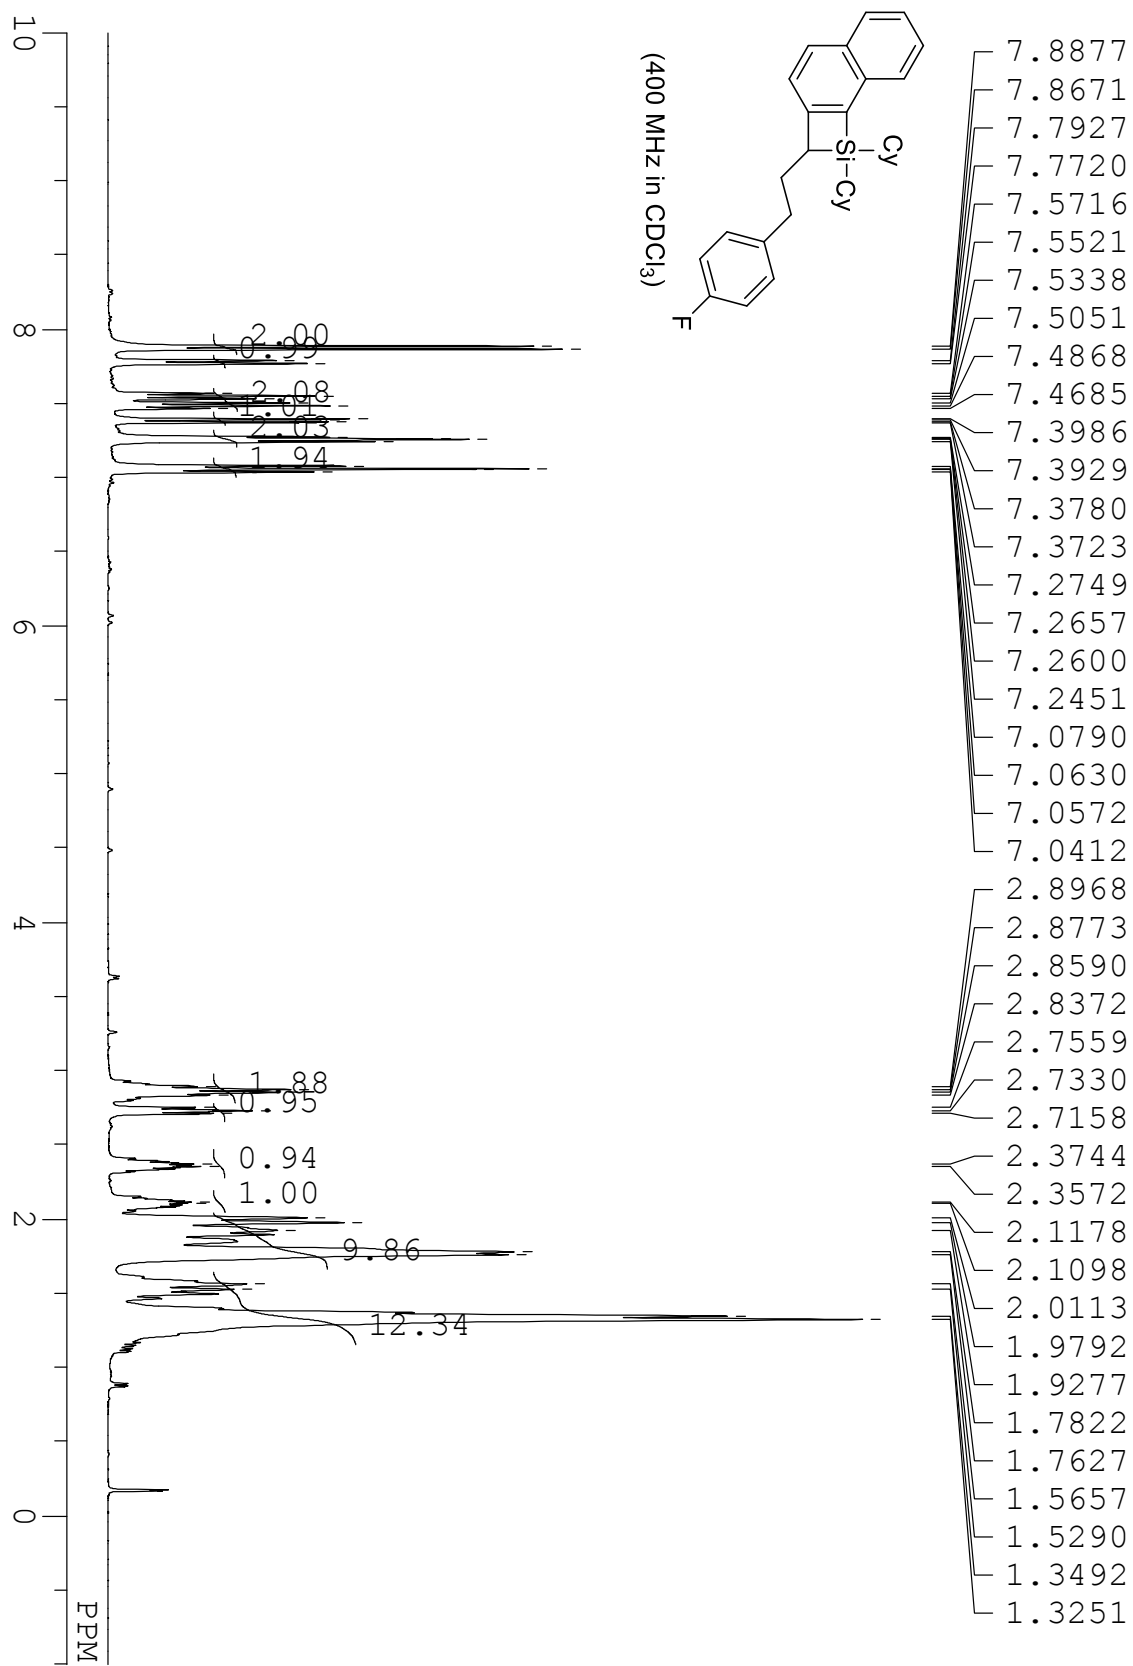

compound **2d** (96% pure)

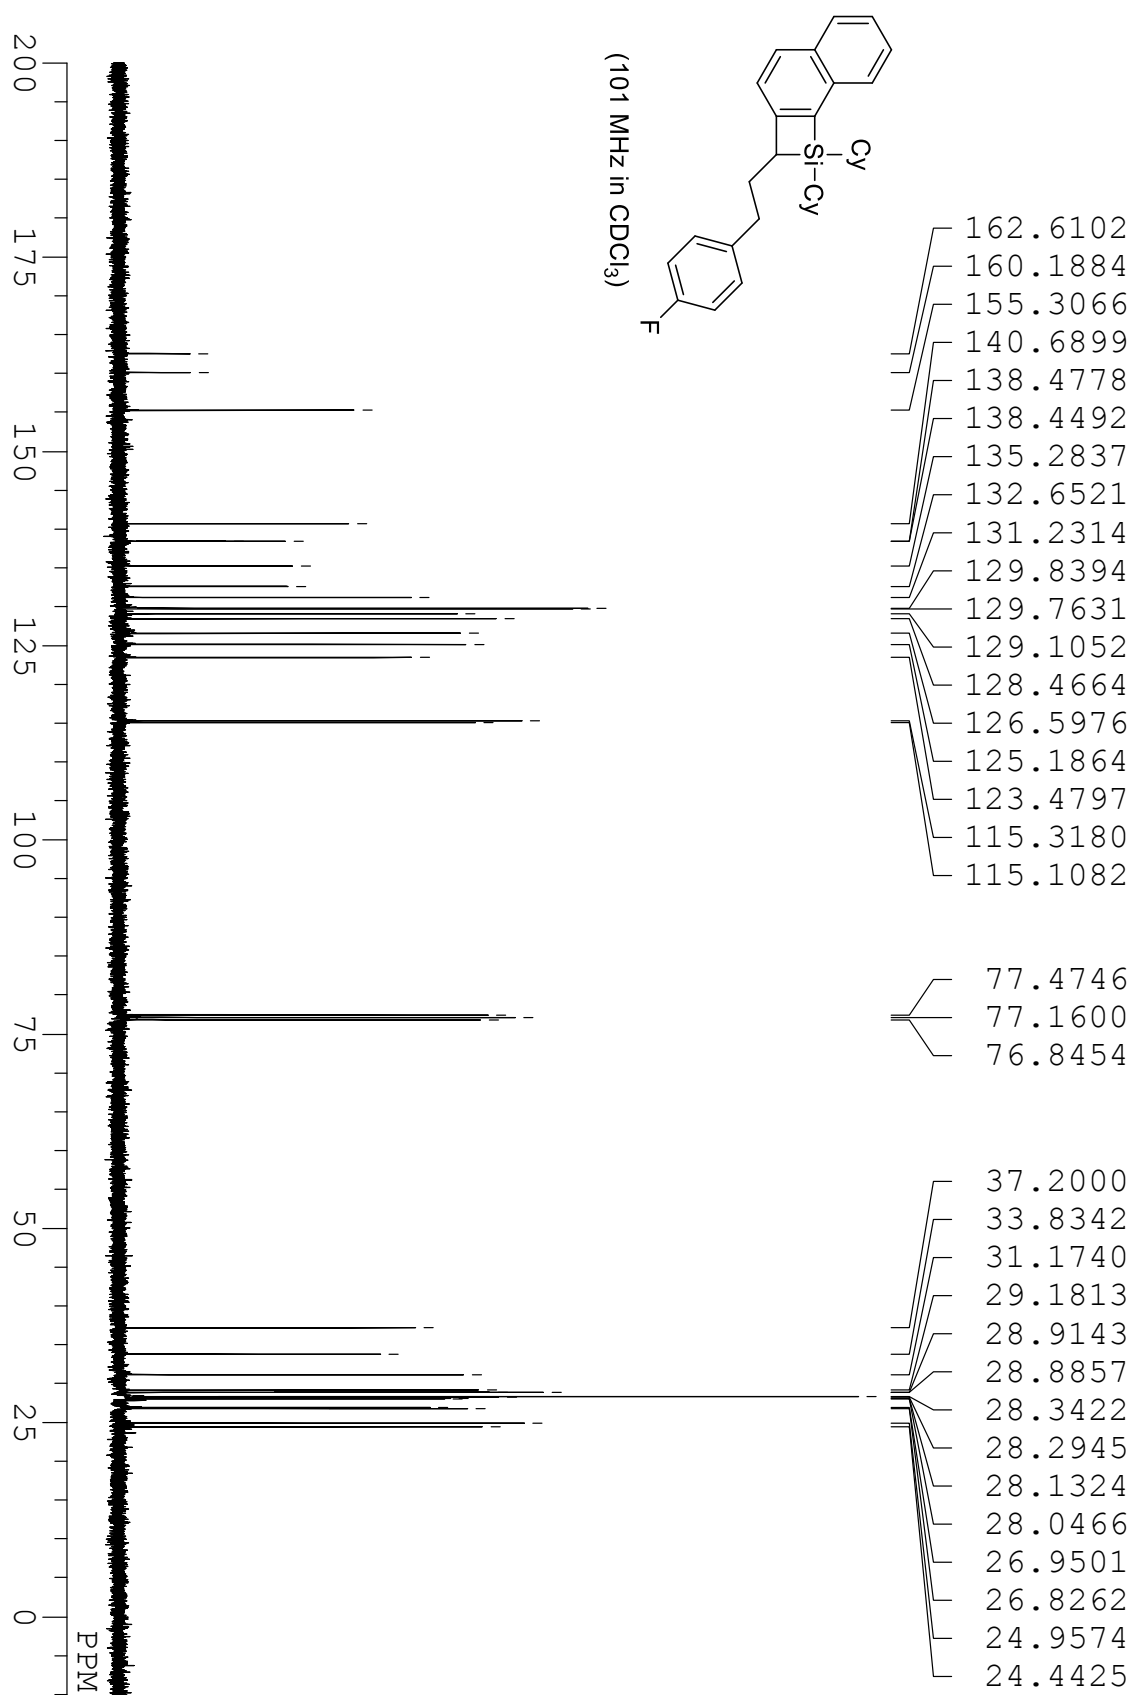

compound 2e

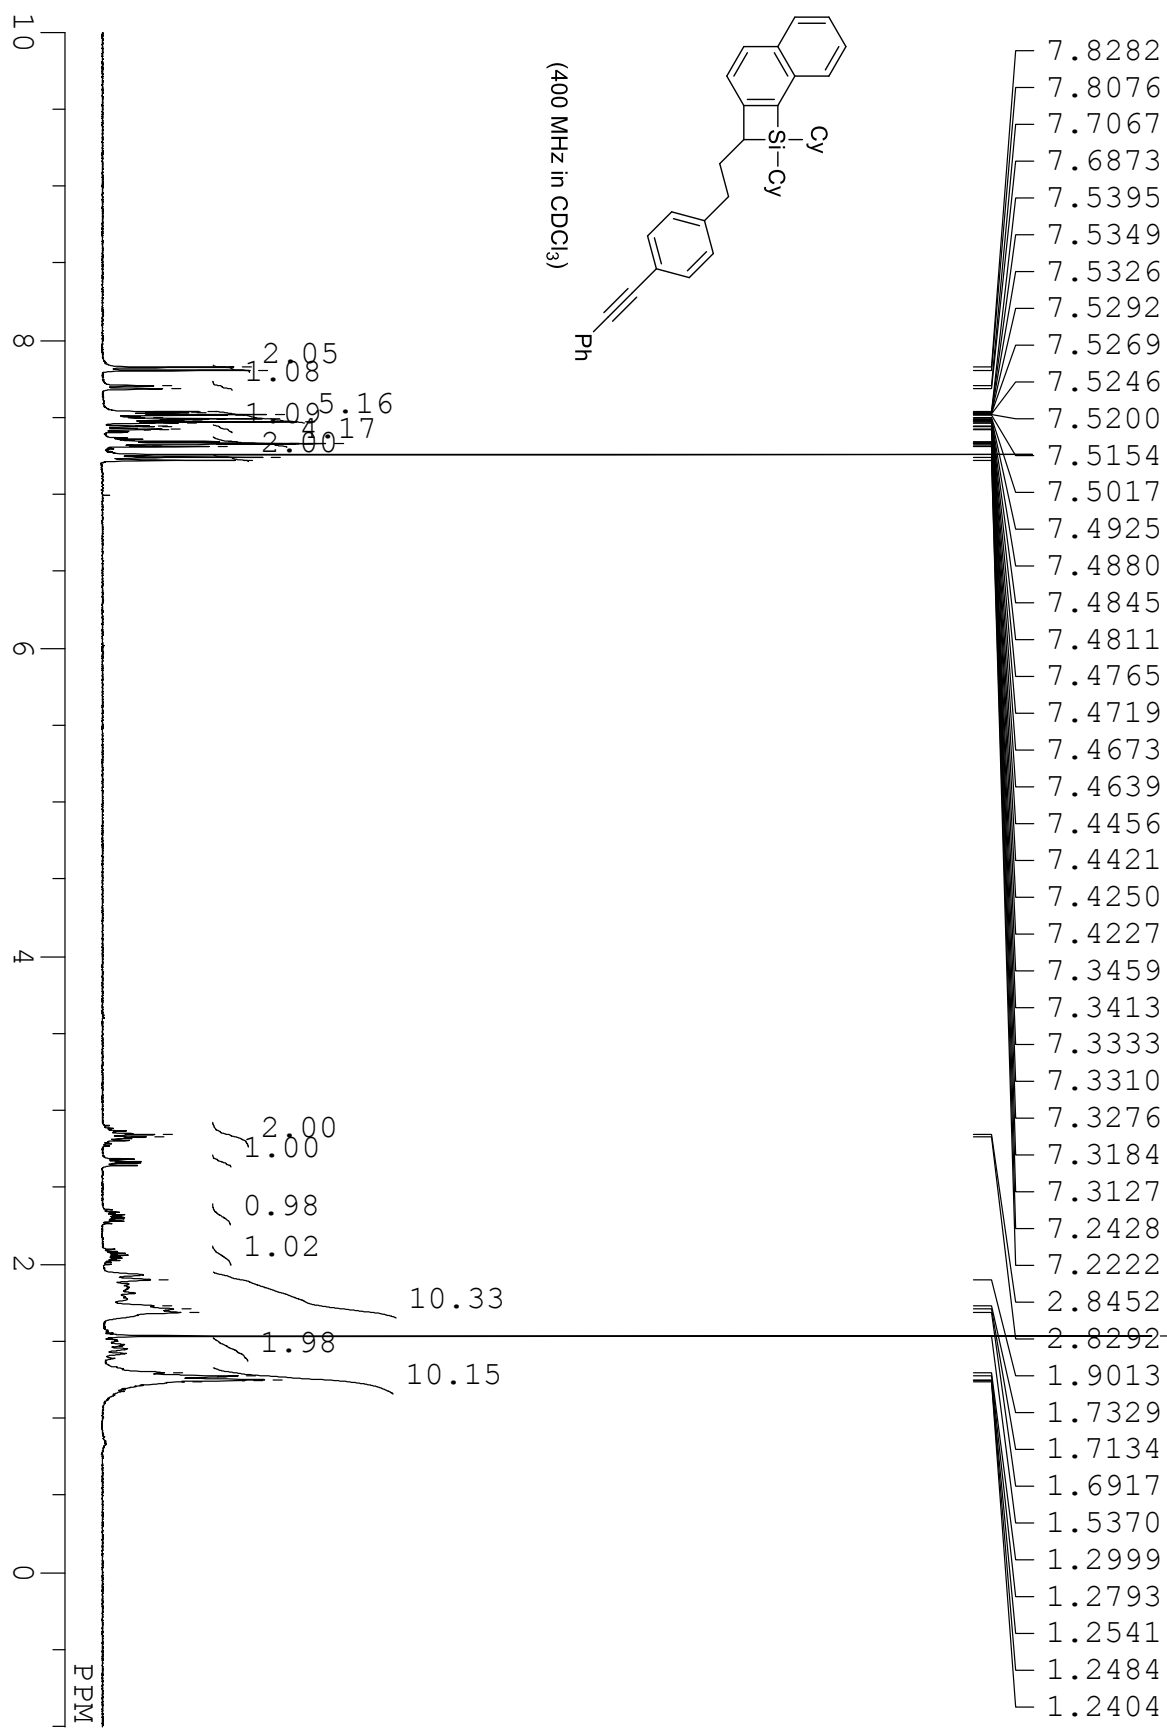

compound 2e

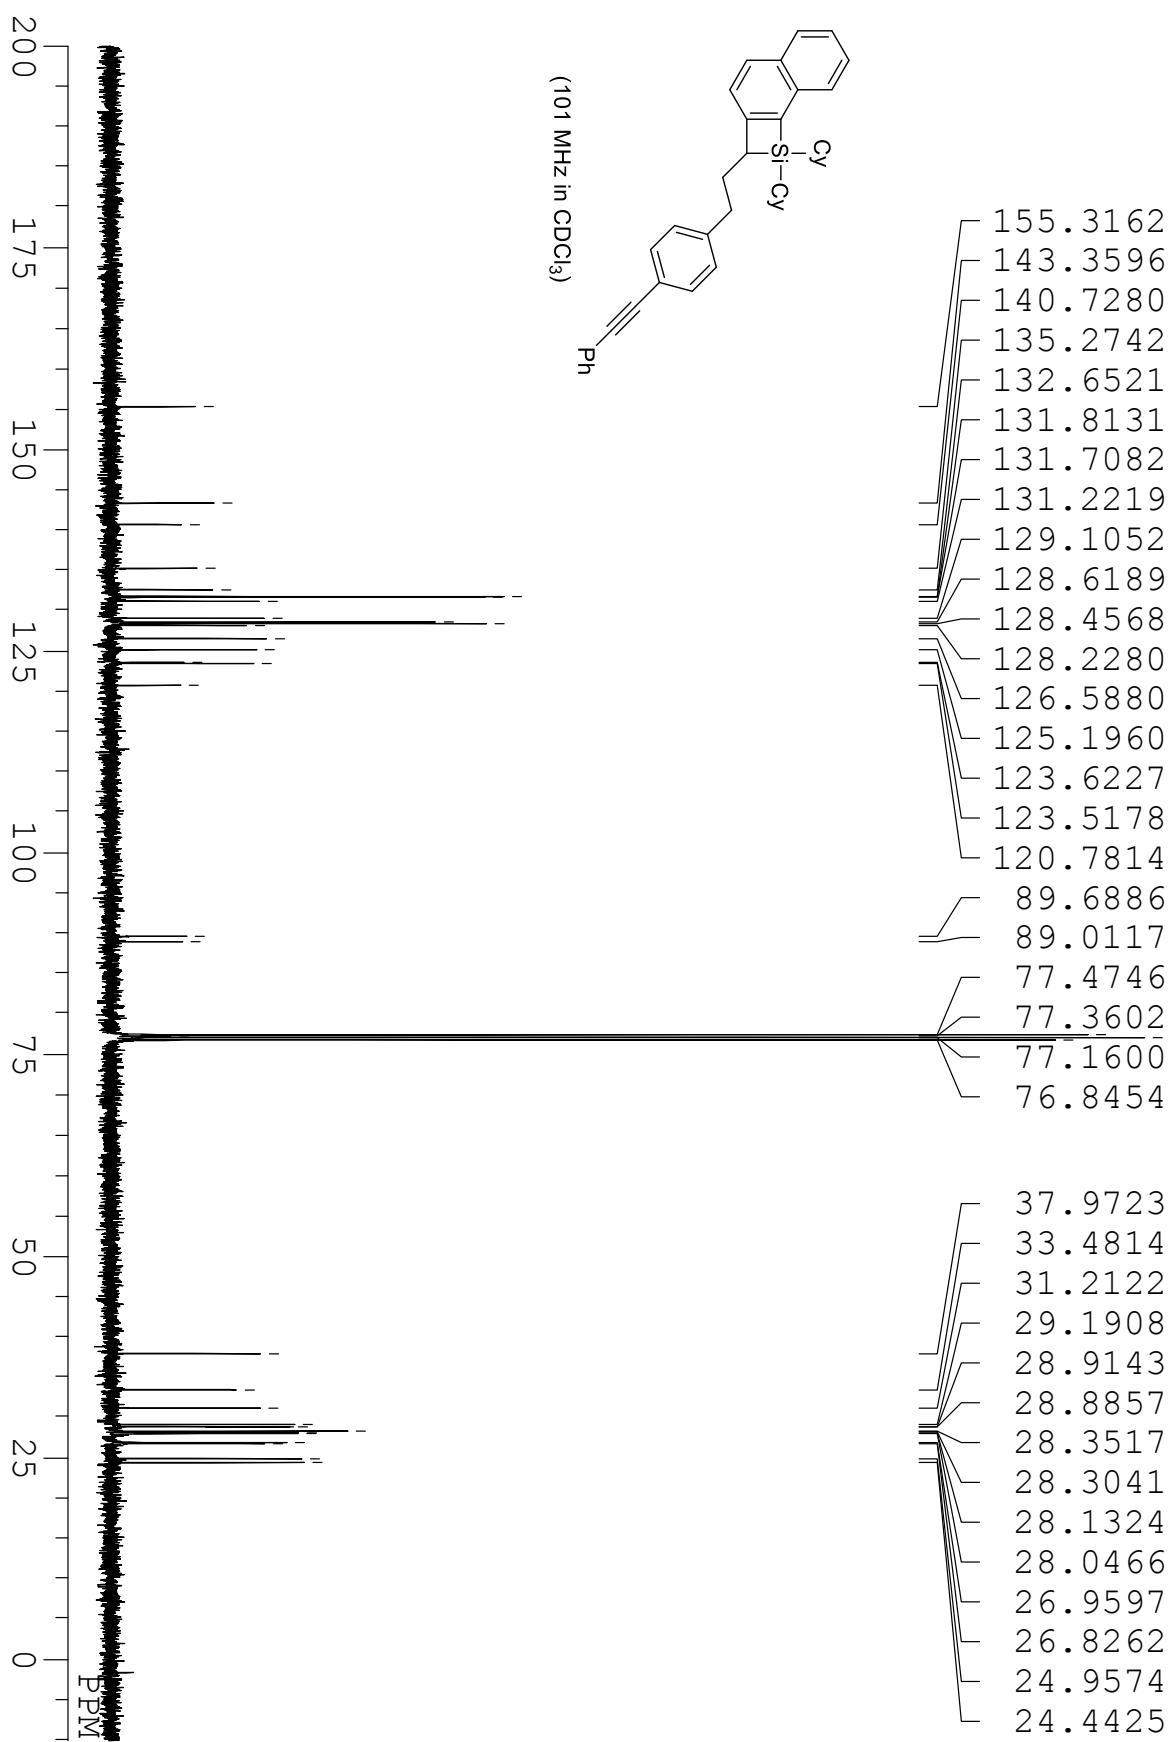

compound **2f** (97% pure)

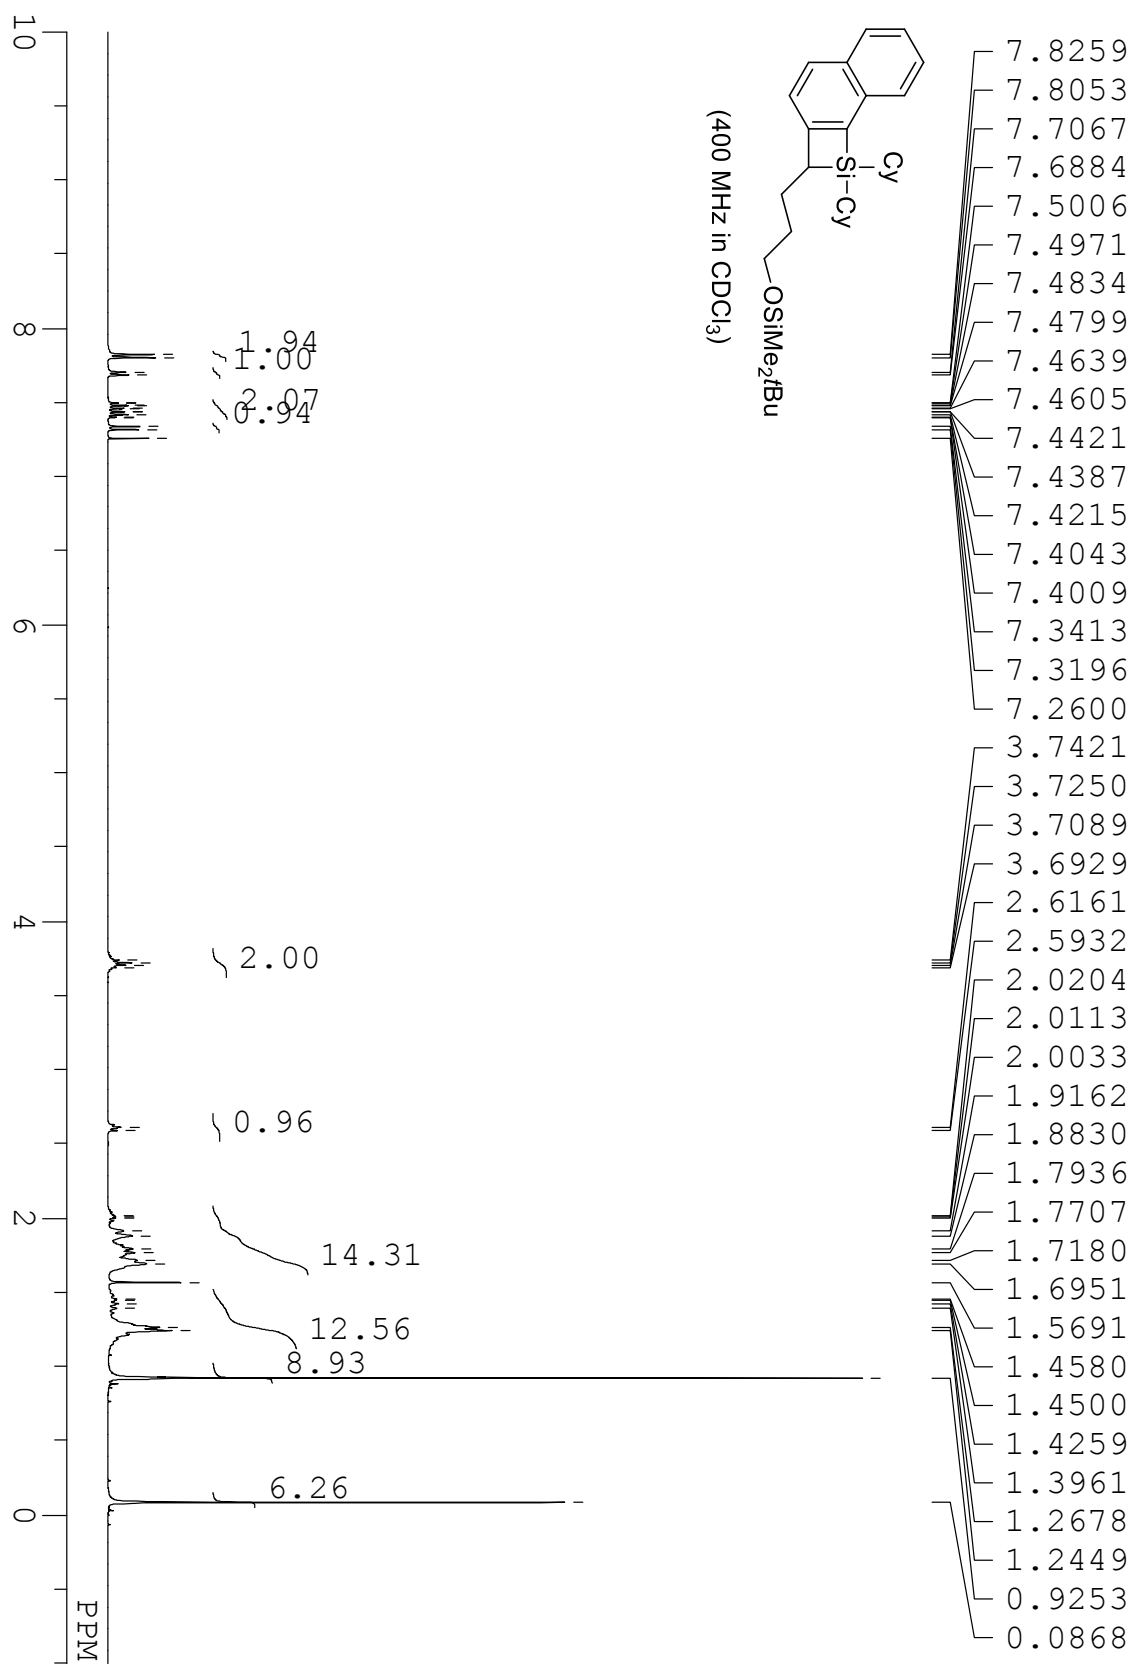

compound **2f** (97% pure)

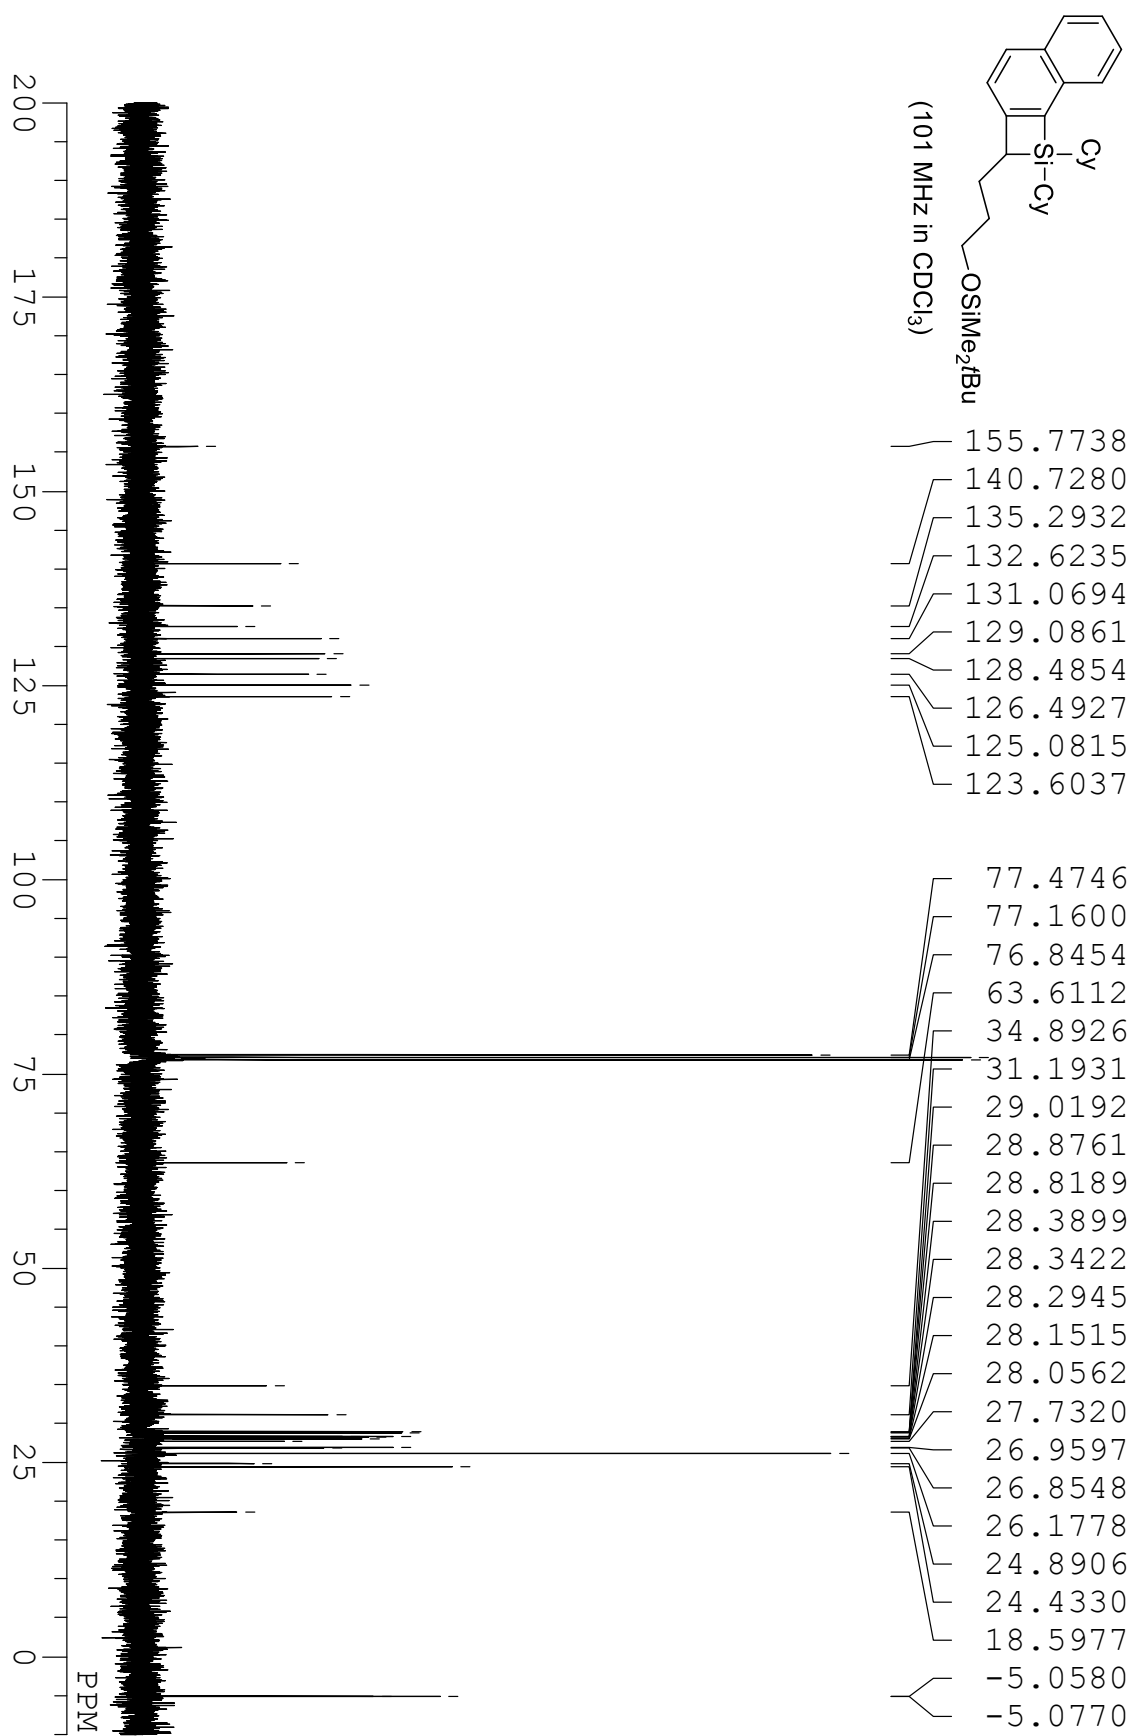



compound **2g** (98% pure)

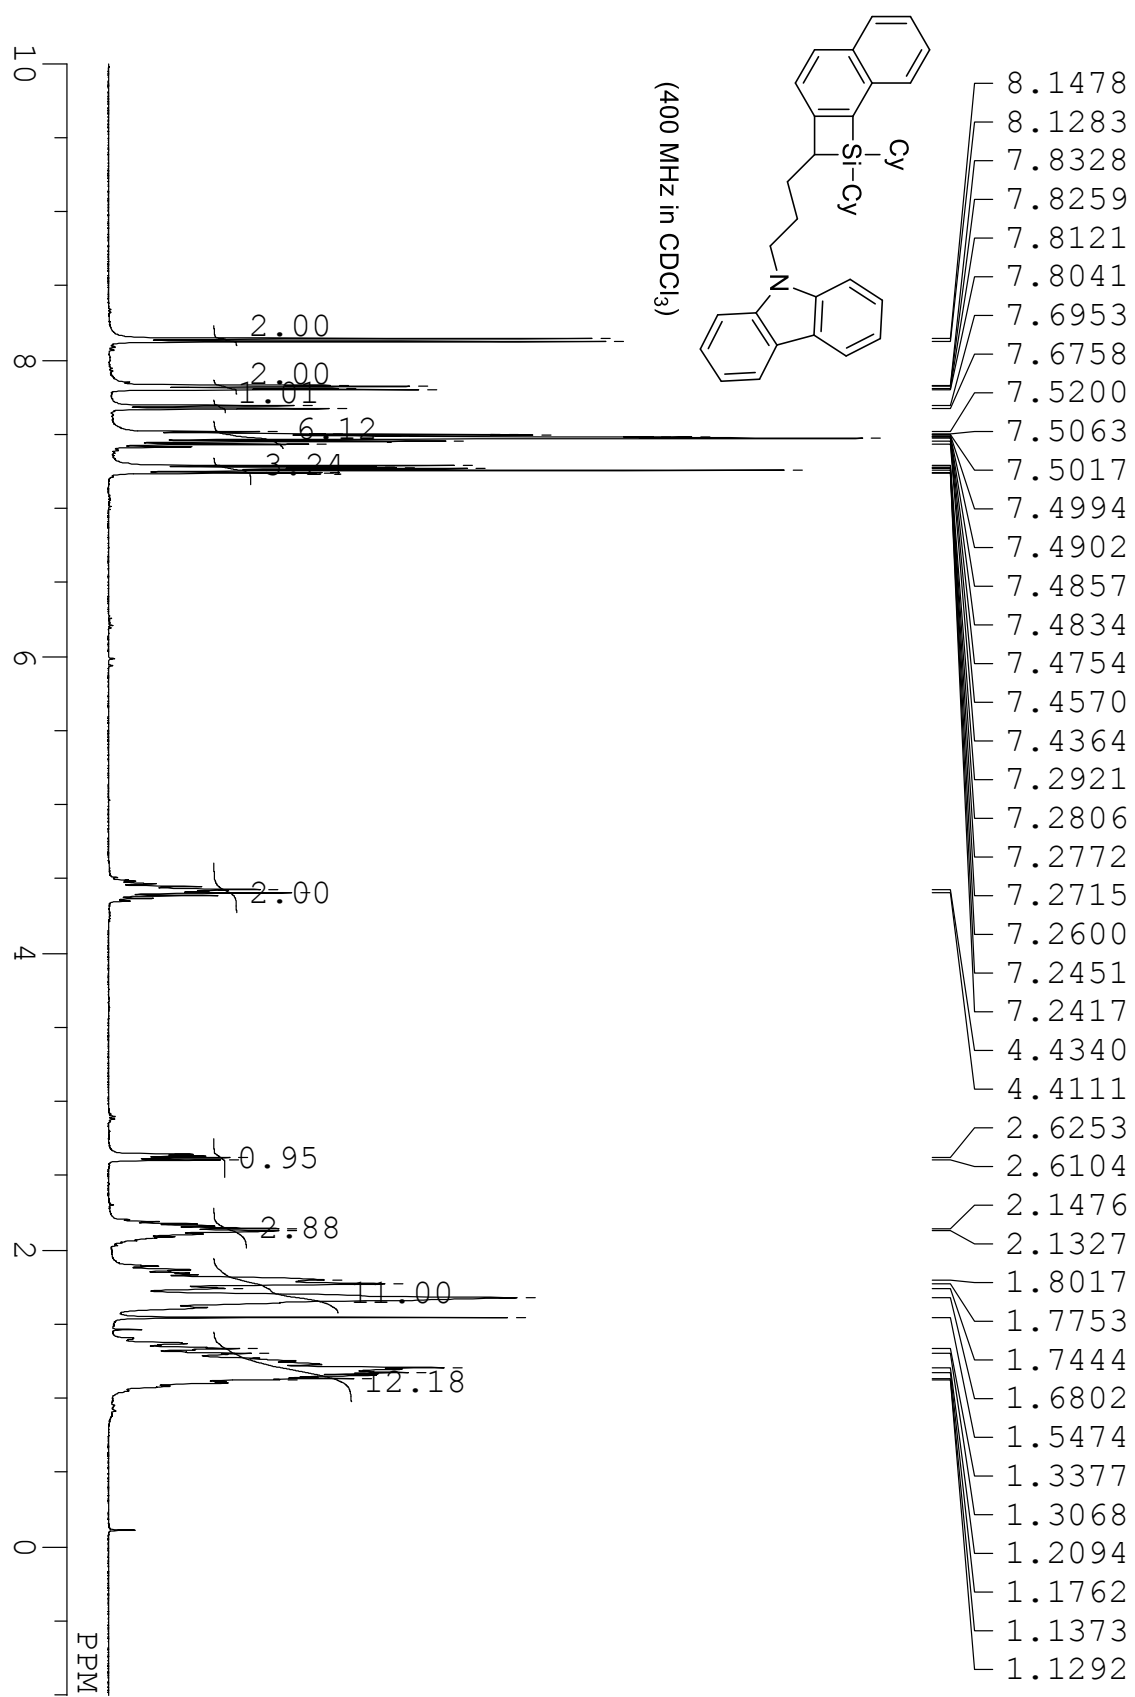

compound **2g** (98% pure)

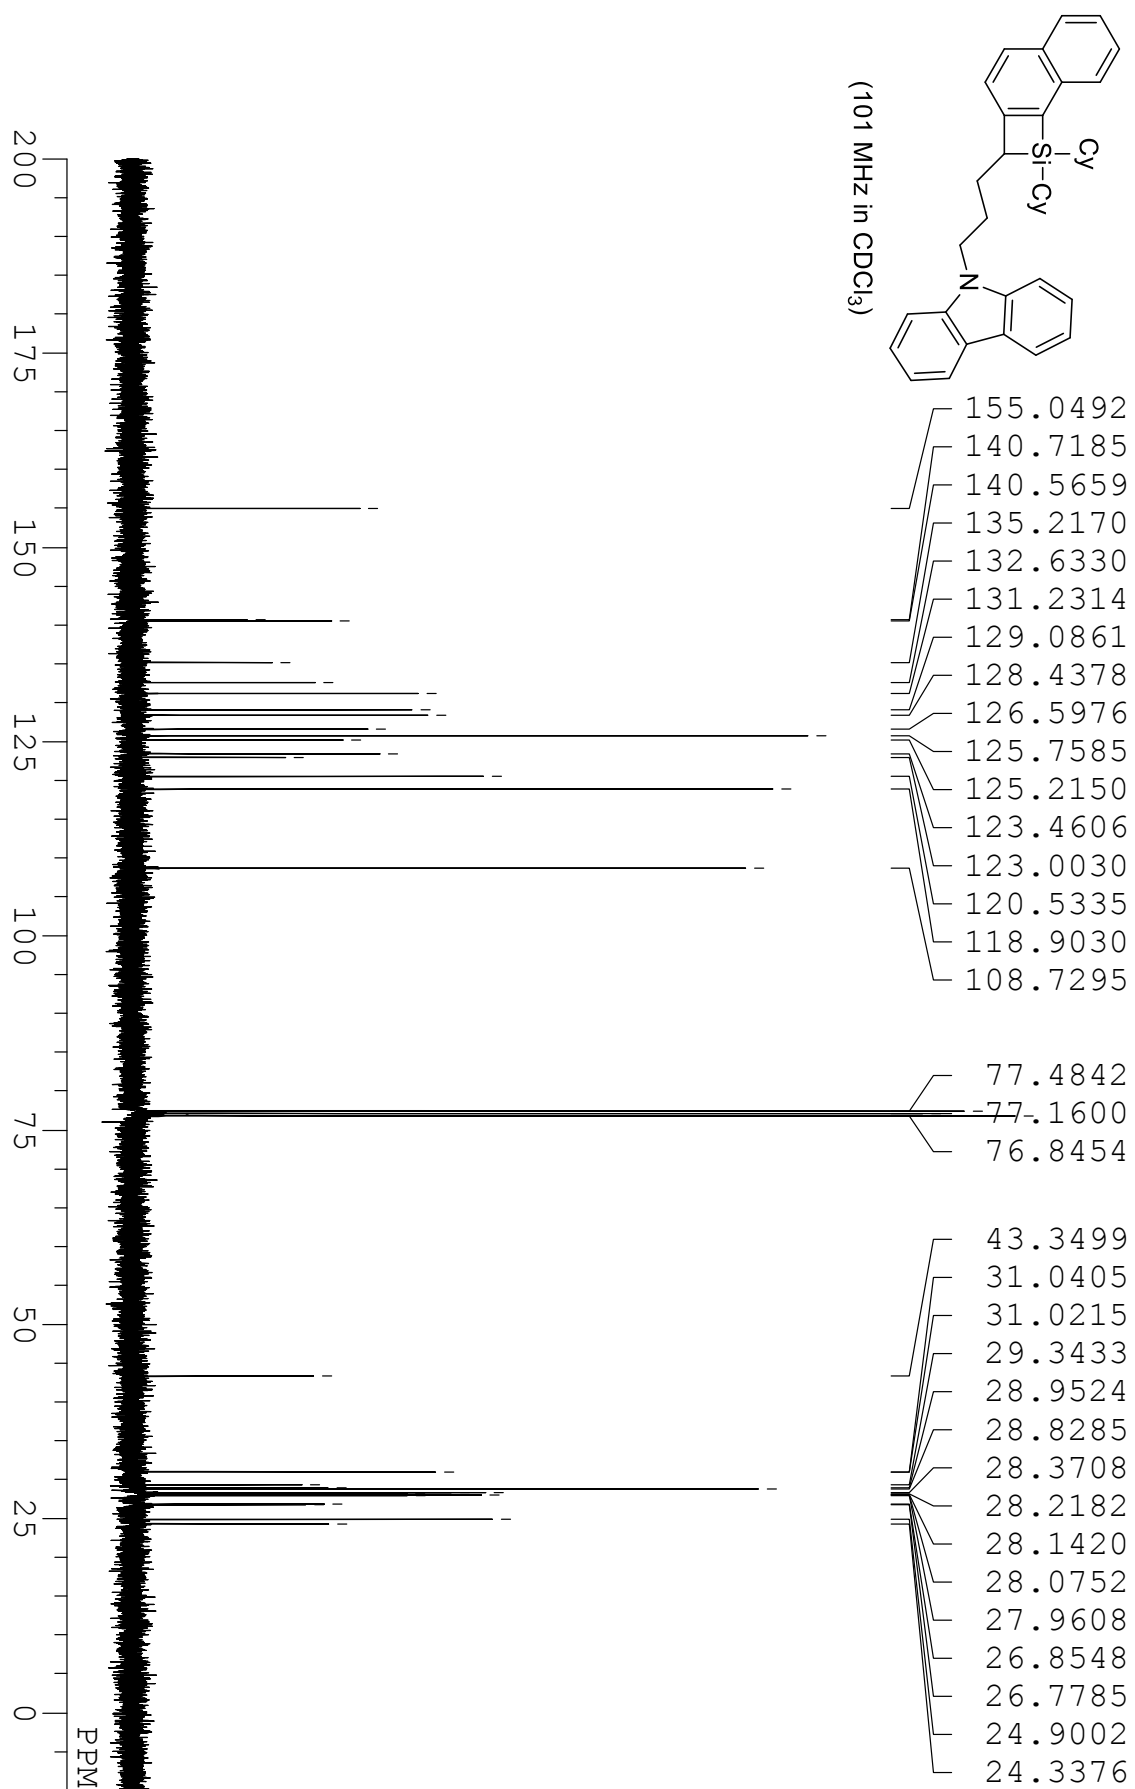

compound **2h**

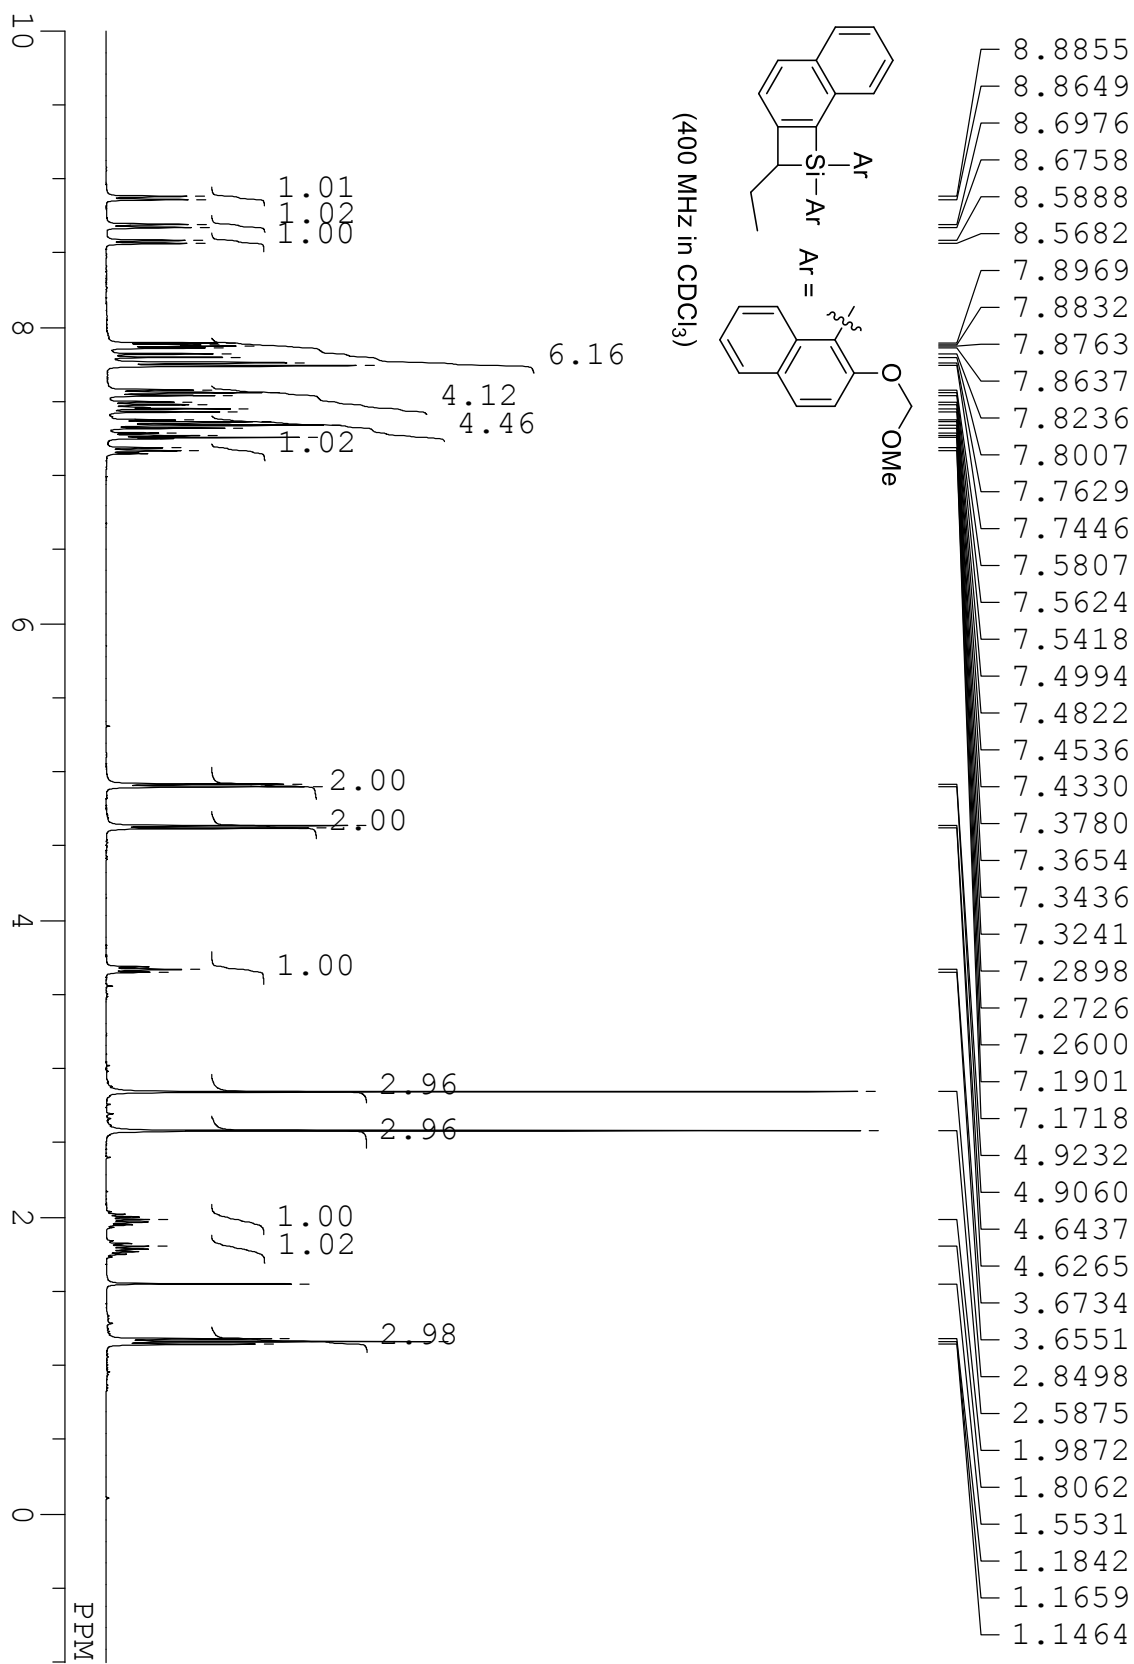

compound 2h

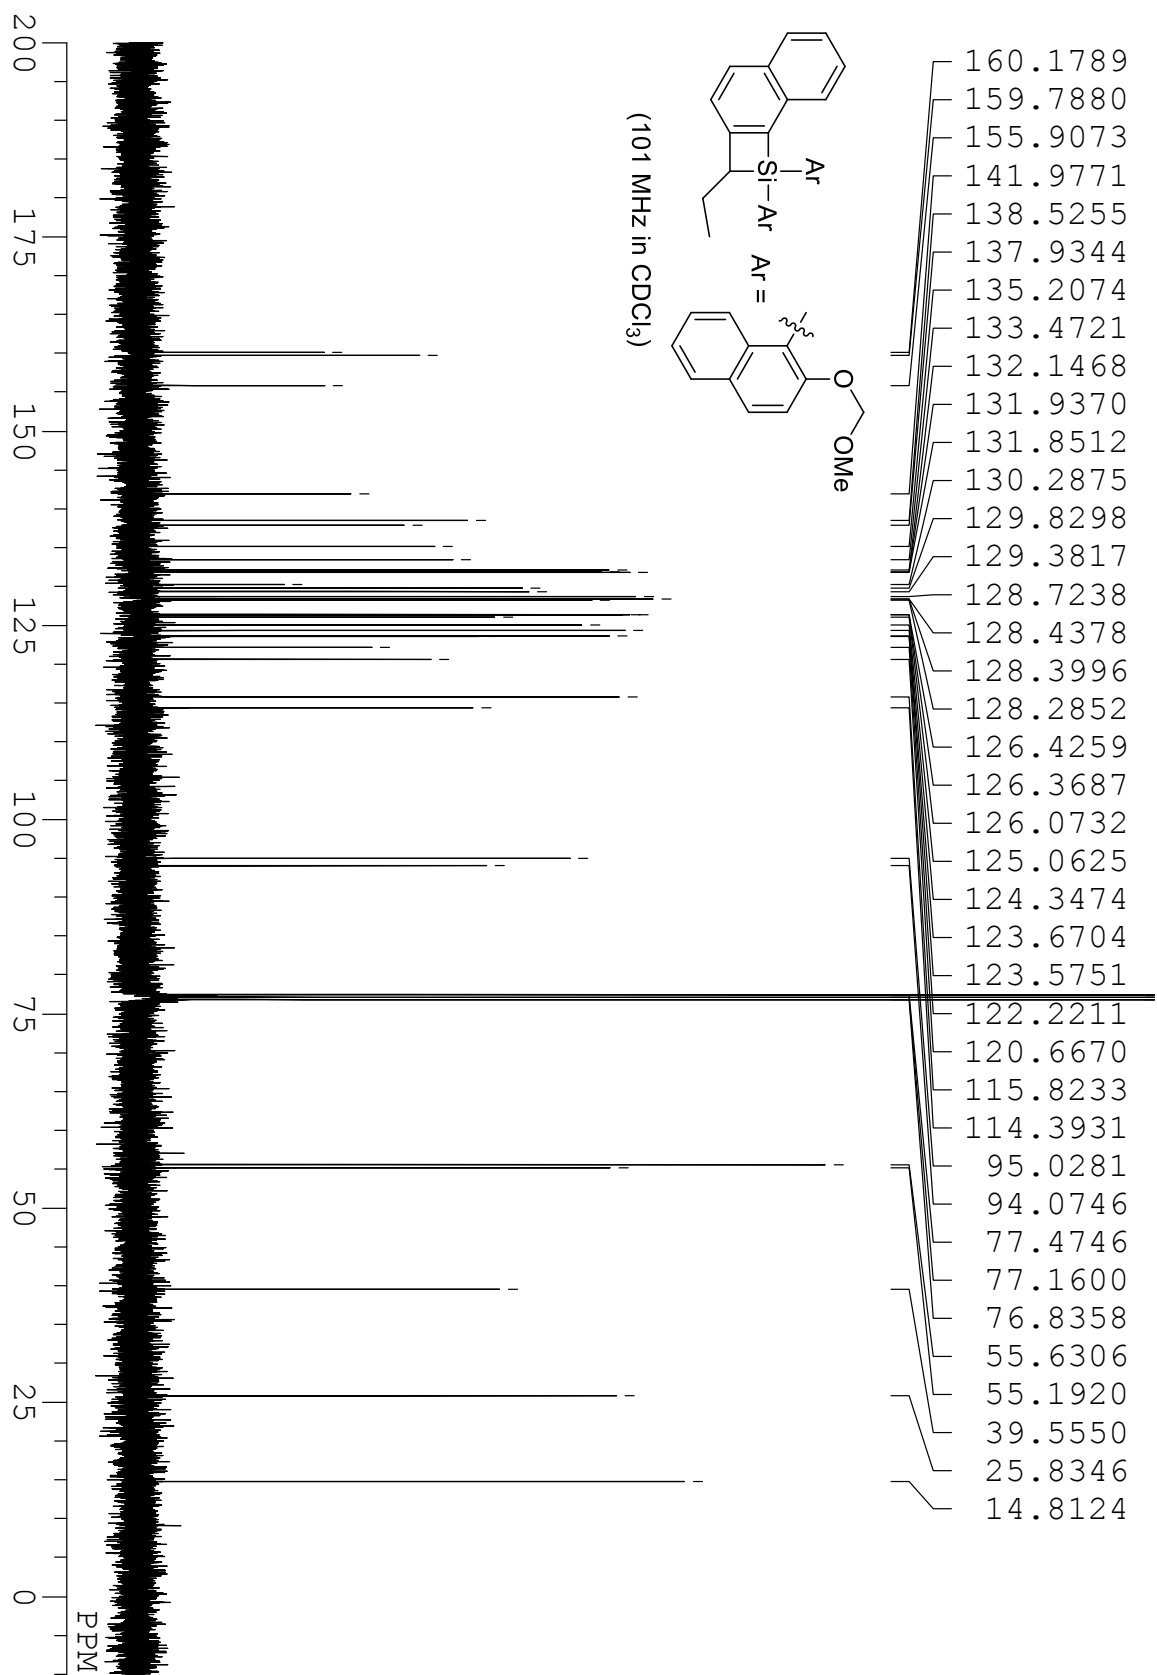

compound **2i** (93% pure)

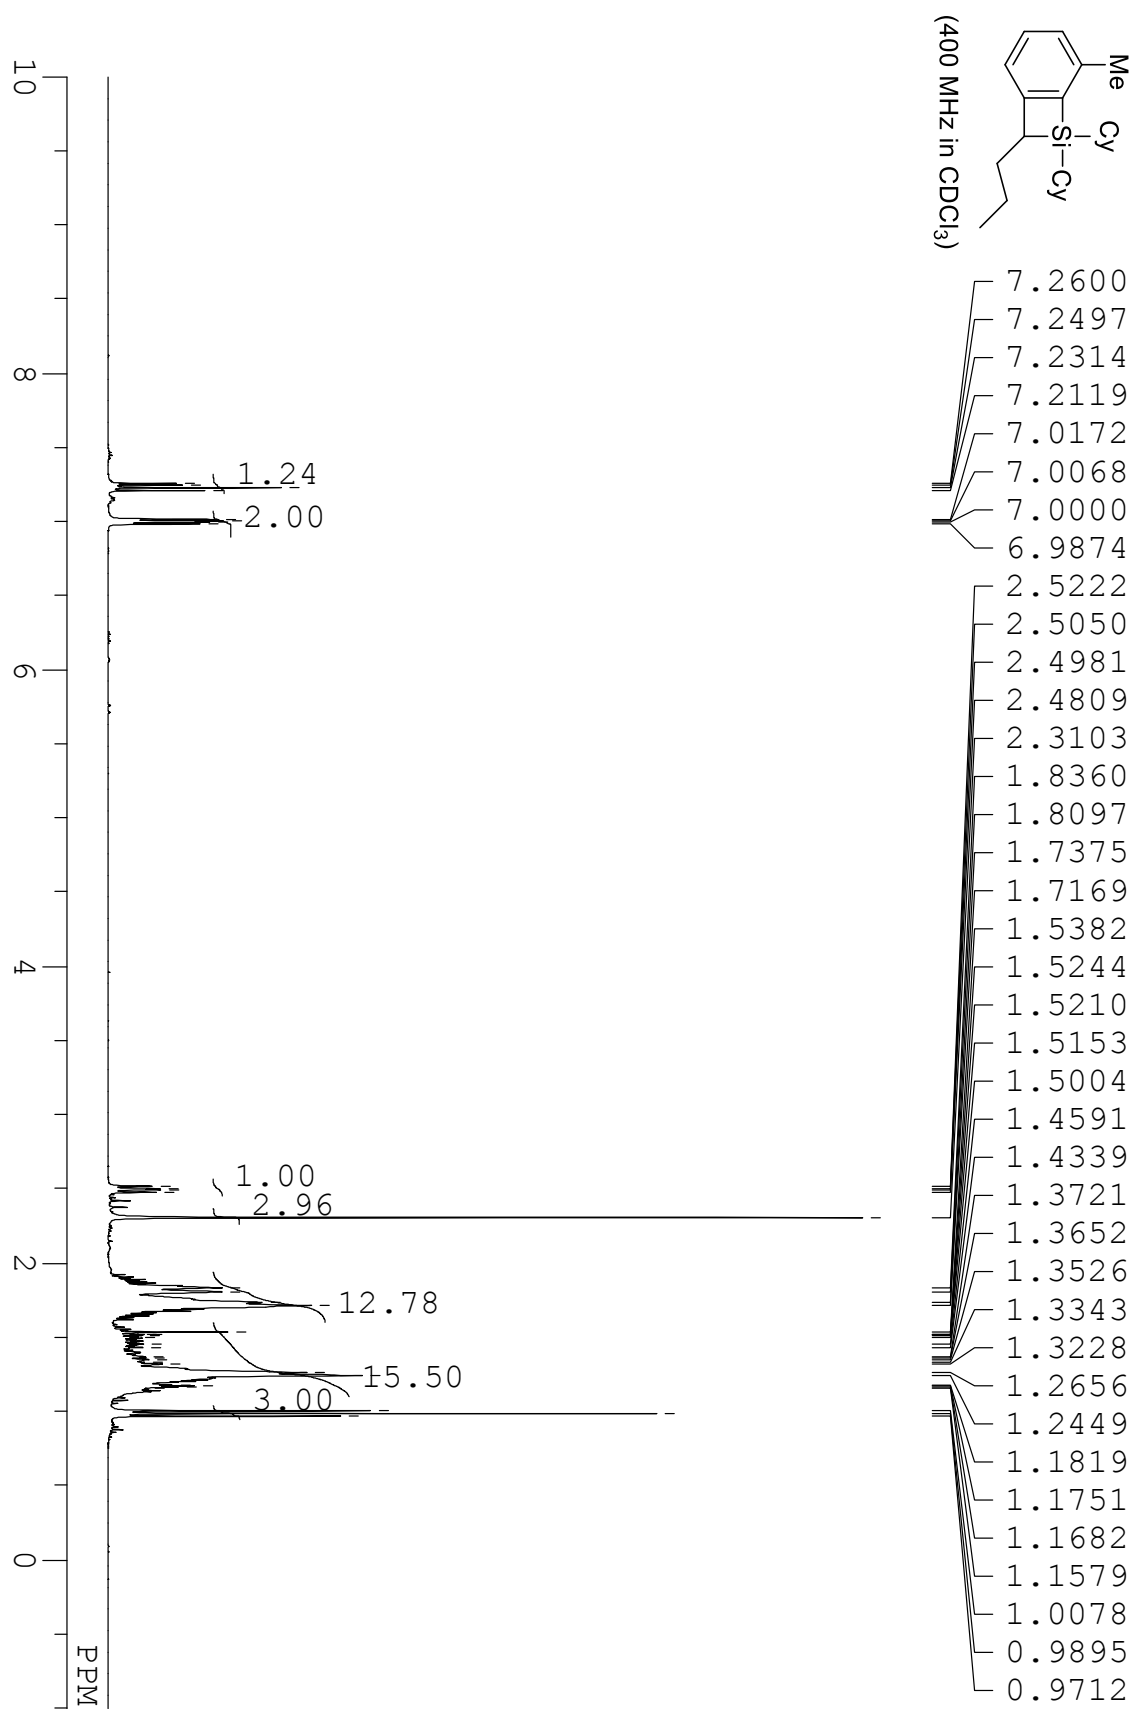

compound **2i** (93% pure)

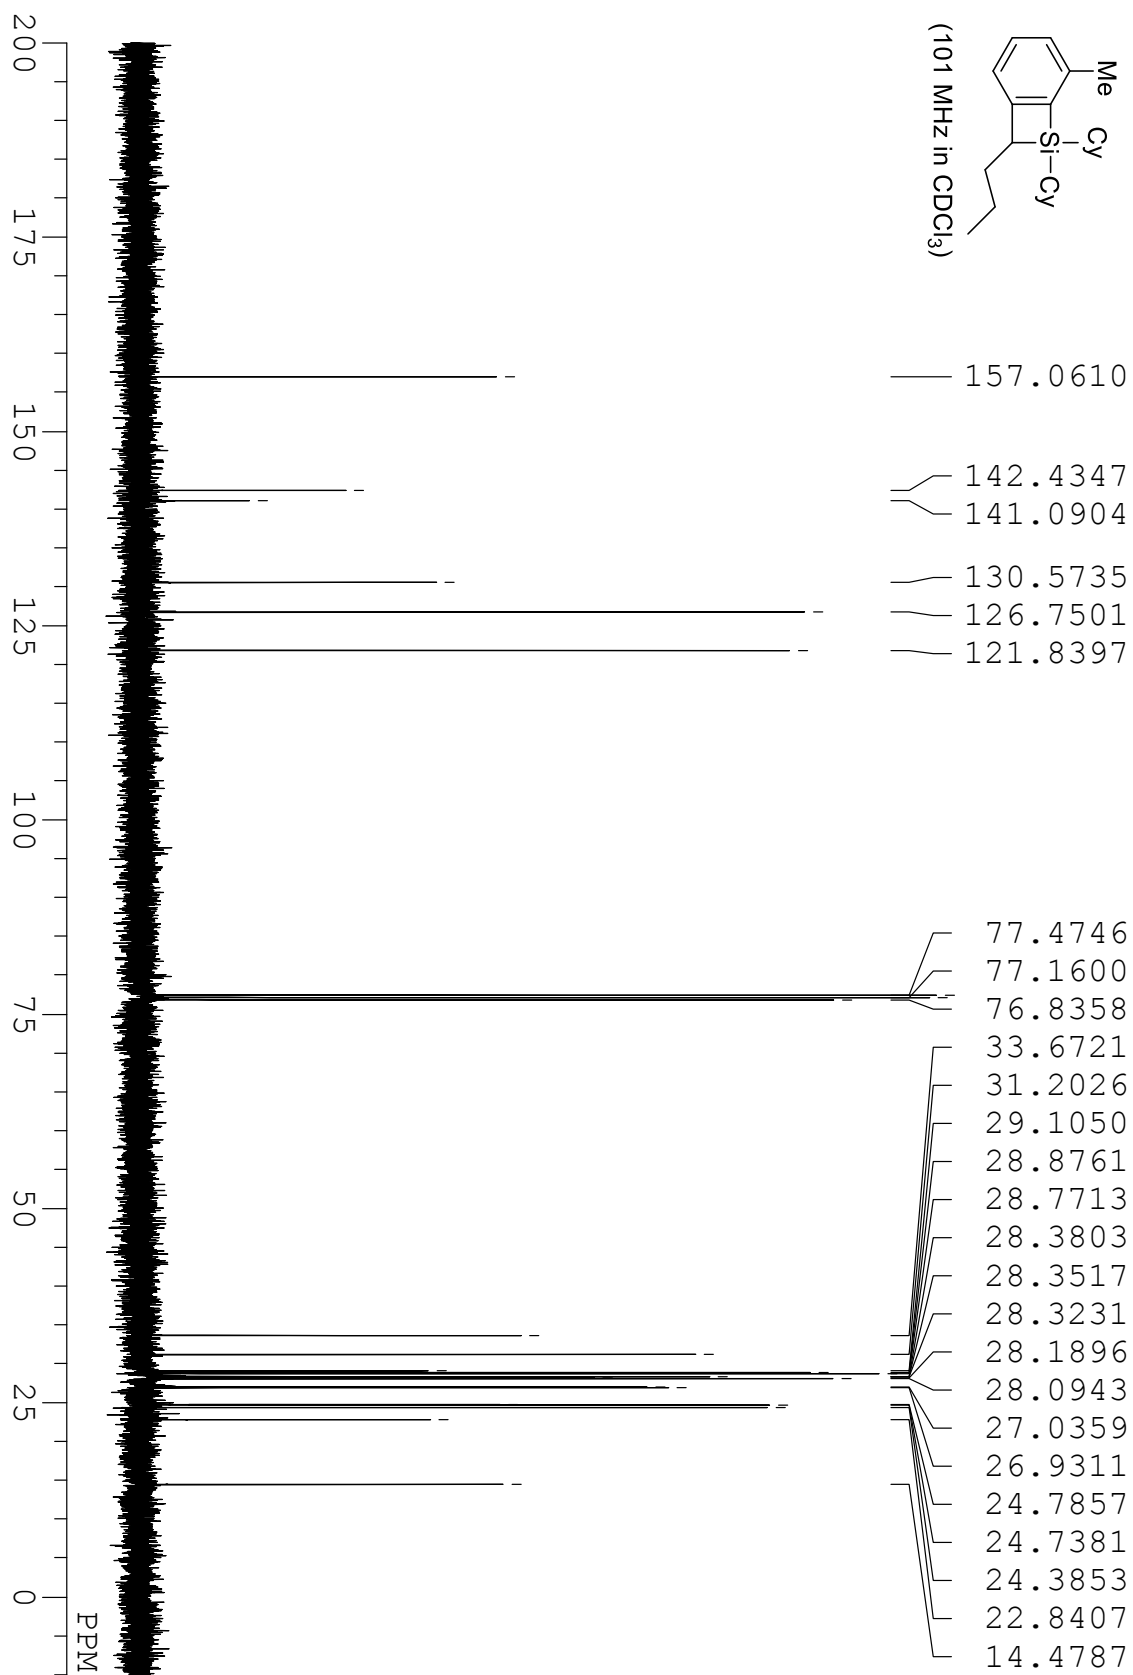

compound **2j** (93% pure)

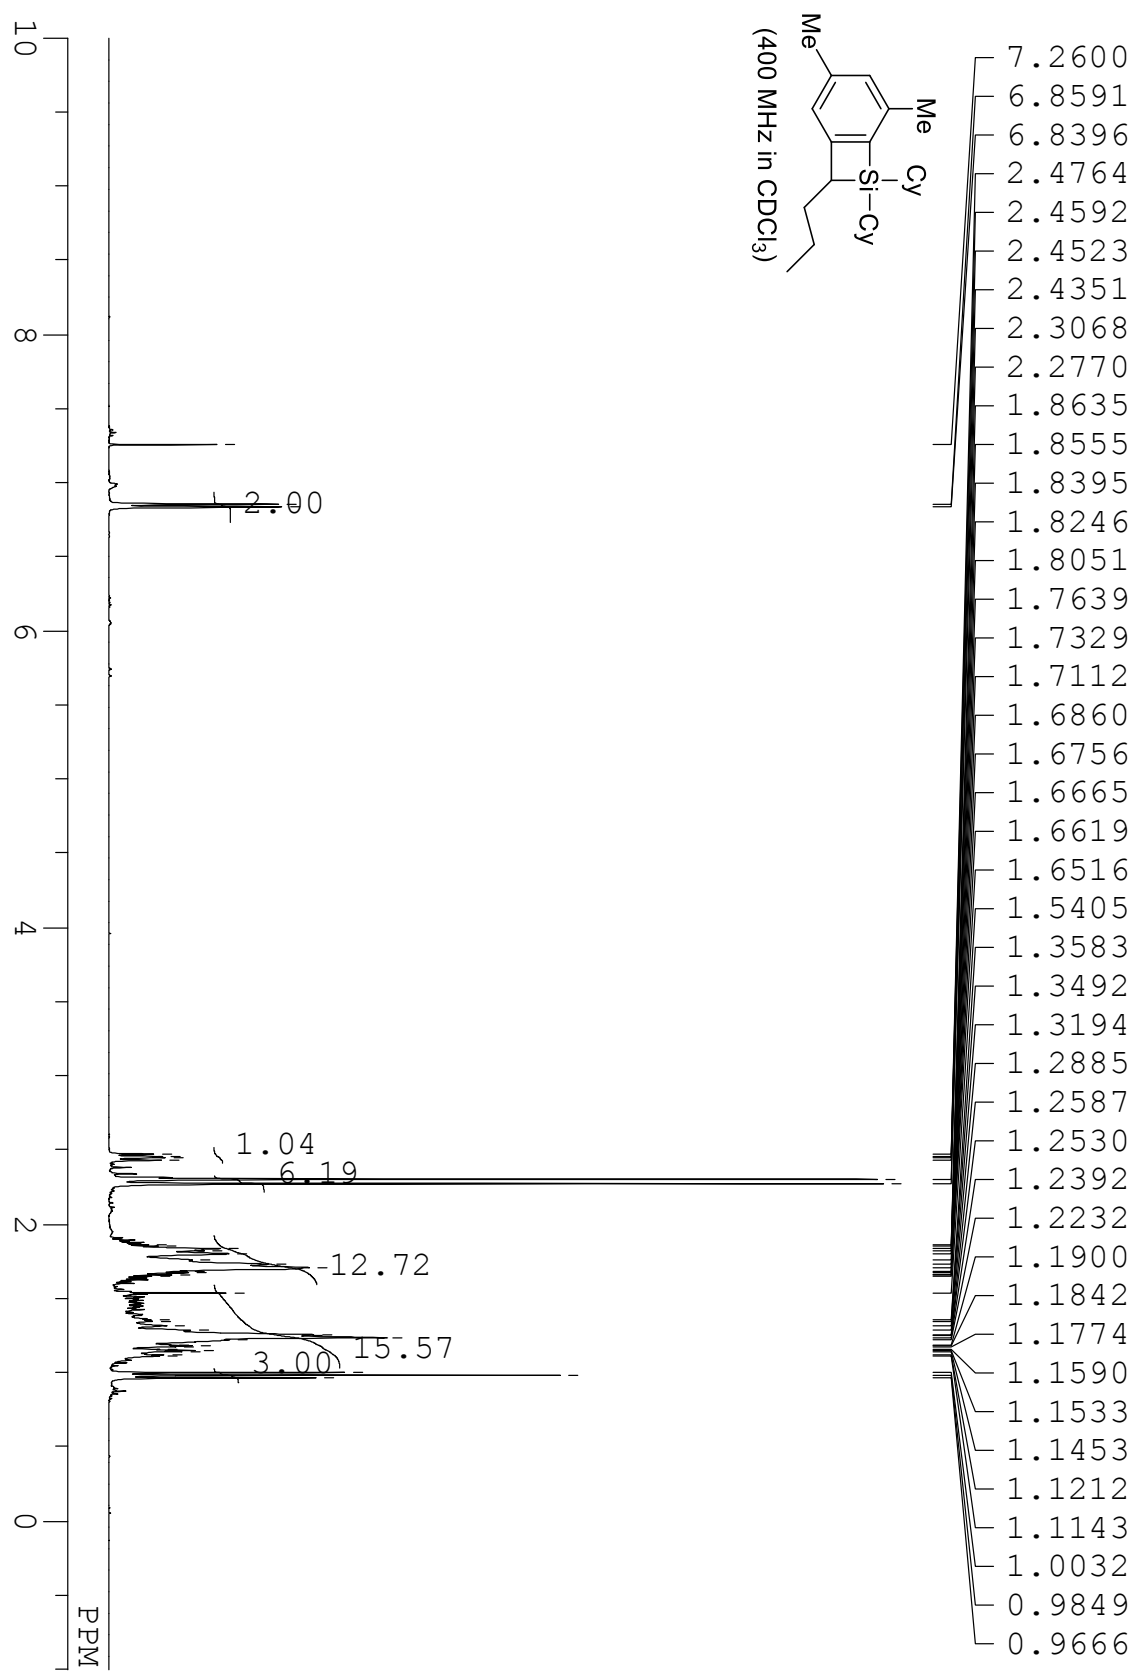

compound **2j** (93% pure)

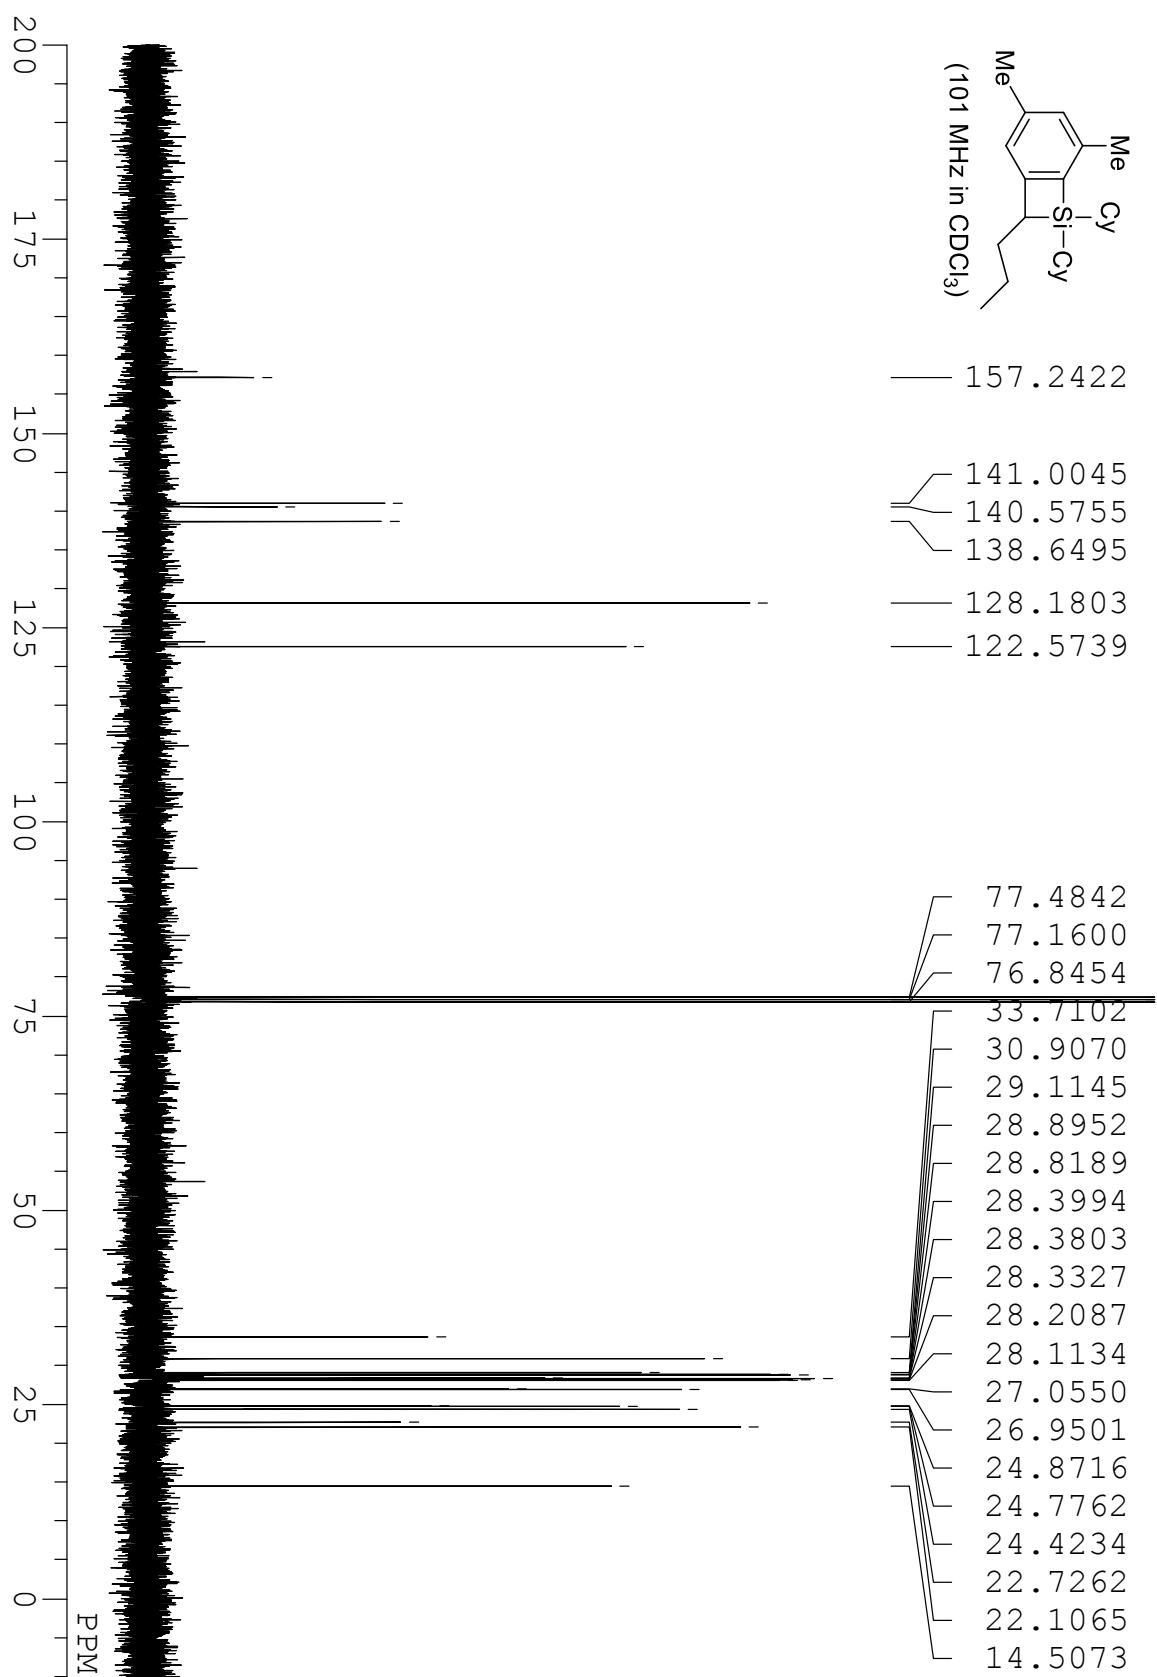



compound **2k** (93% pure)

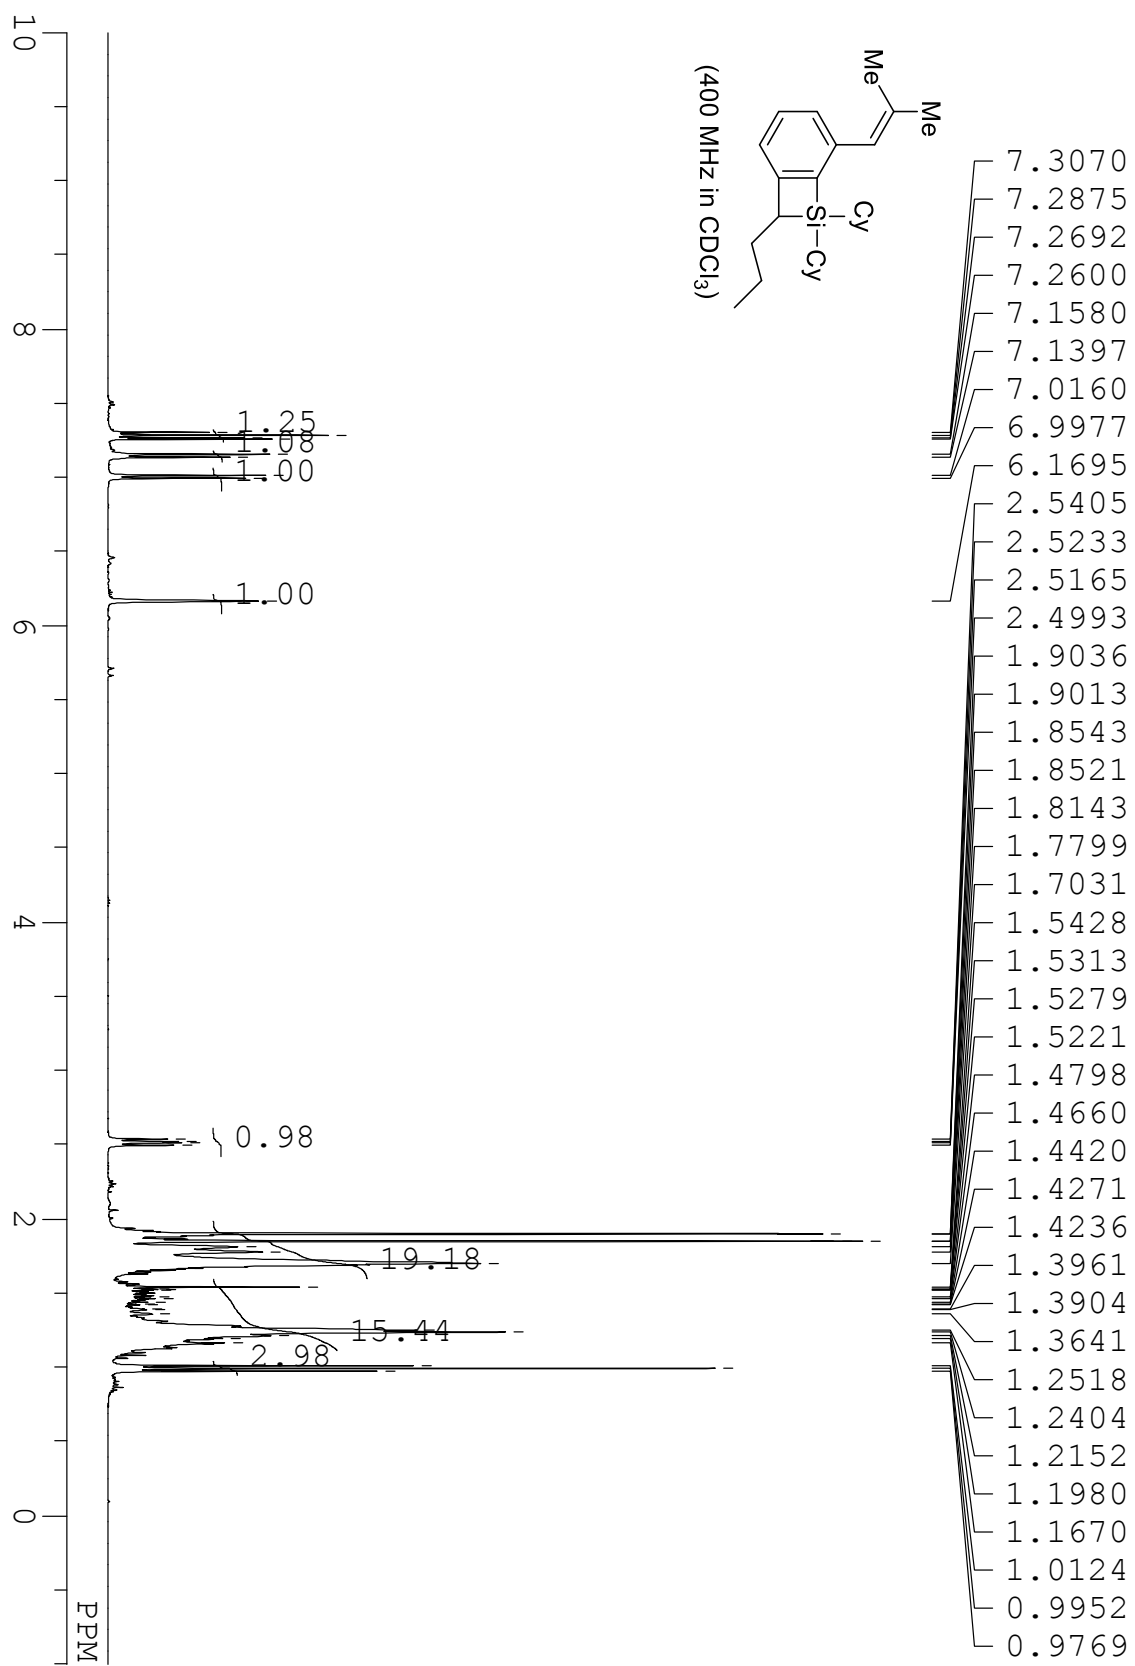

compound **2k** (93% pure)

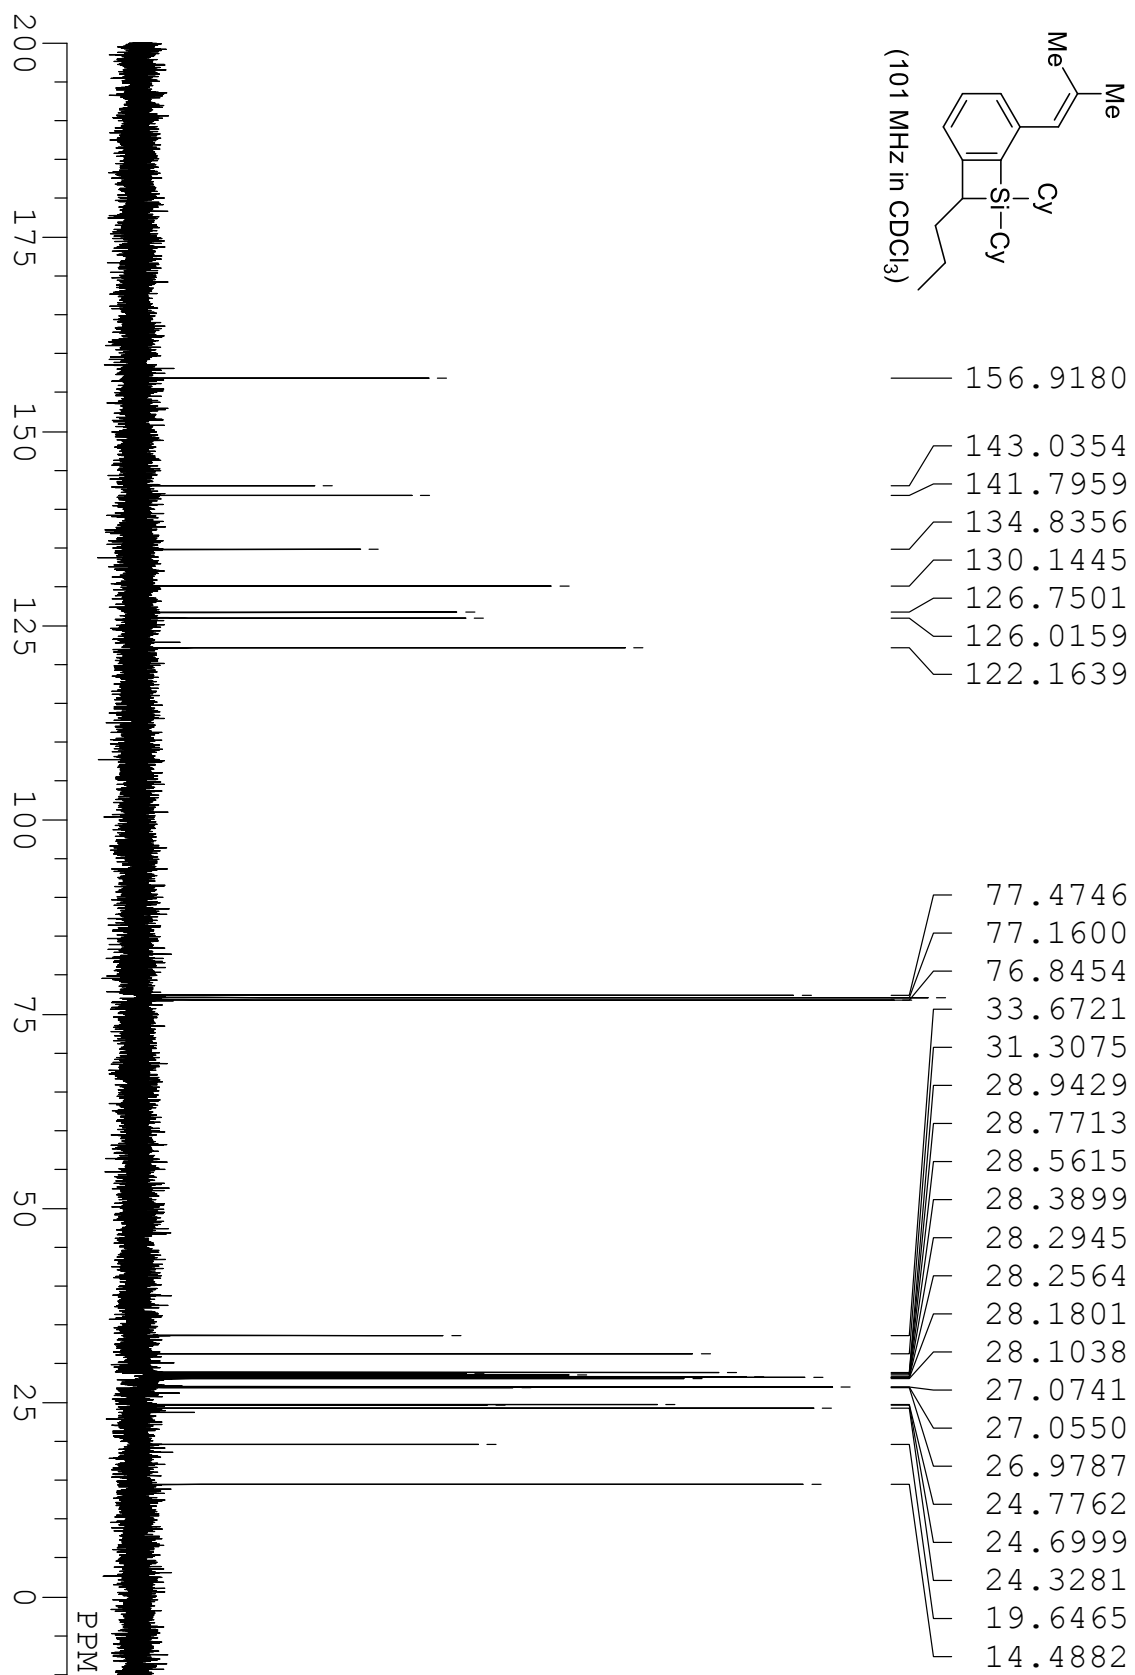

compound **2I** (91% pure)

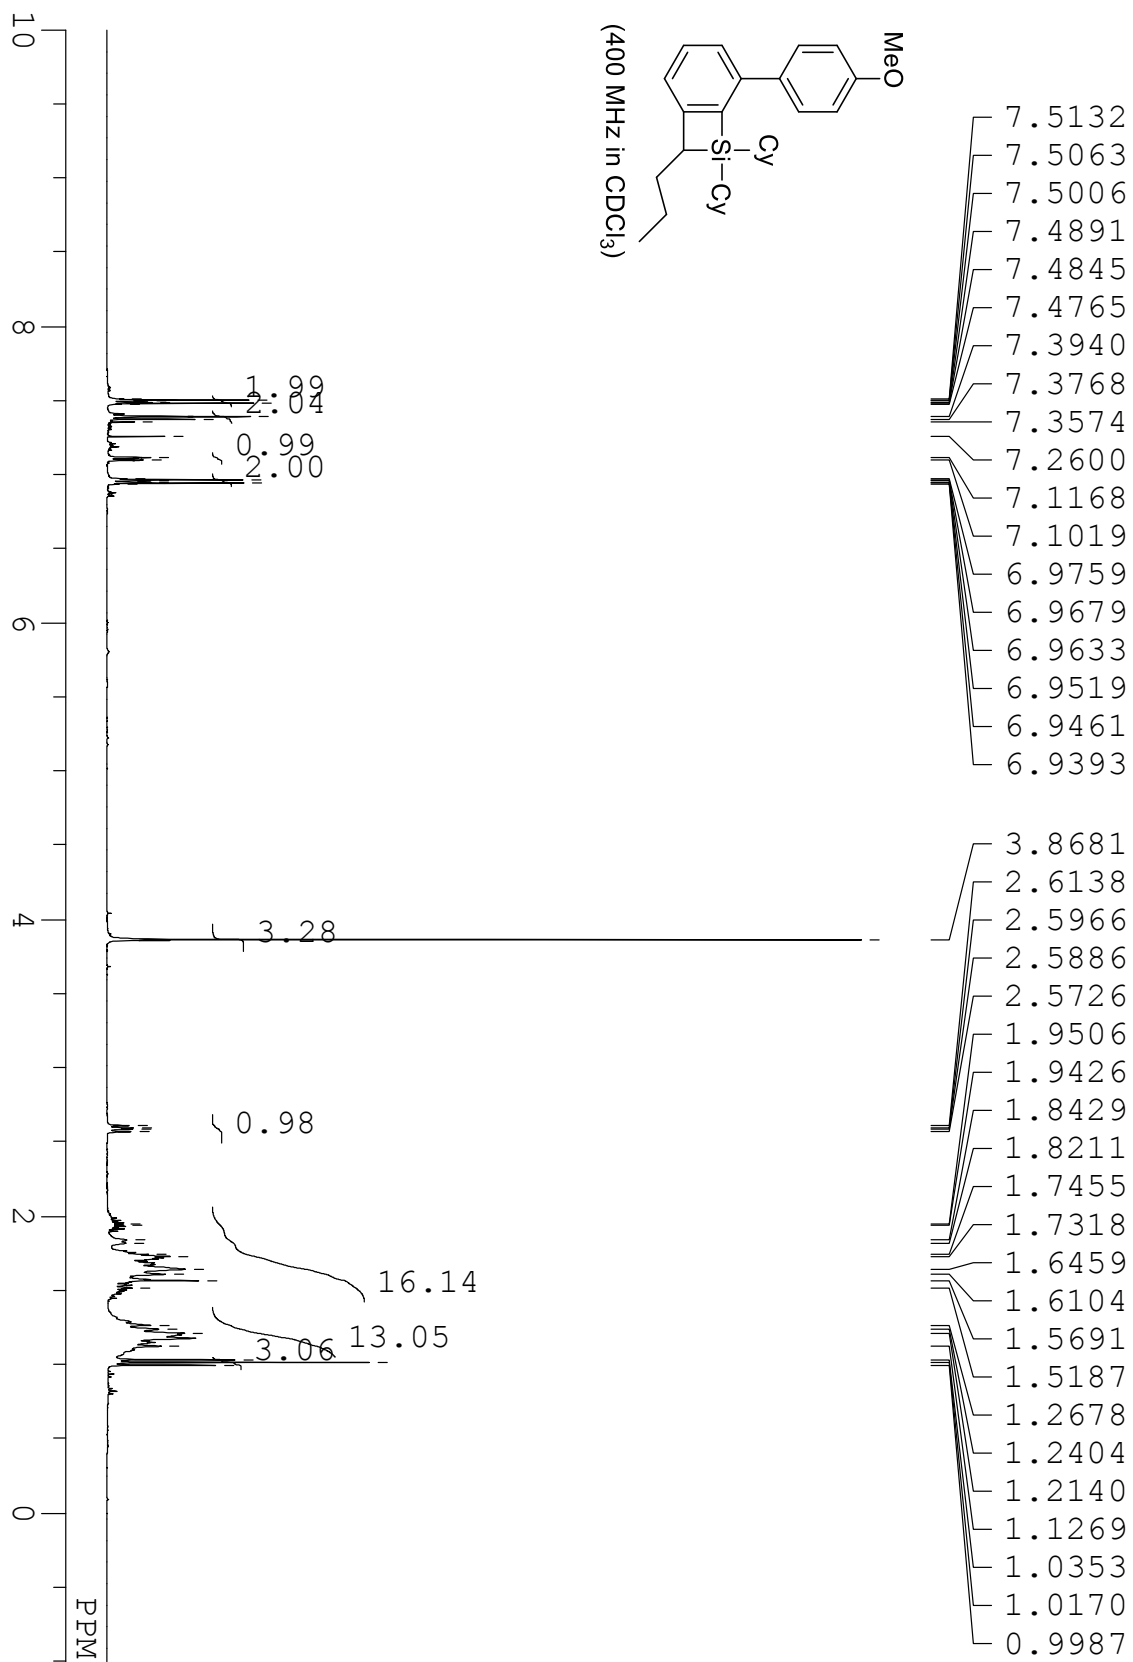

compound **2I** (91% pure)

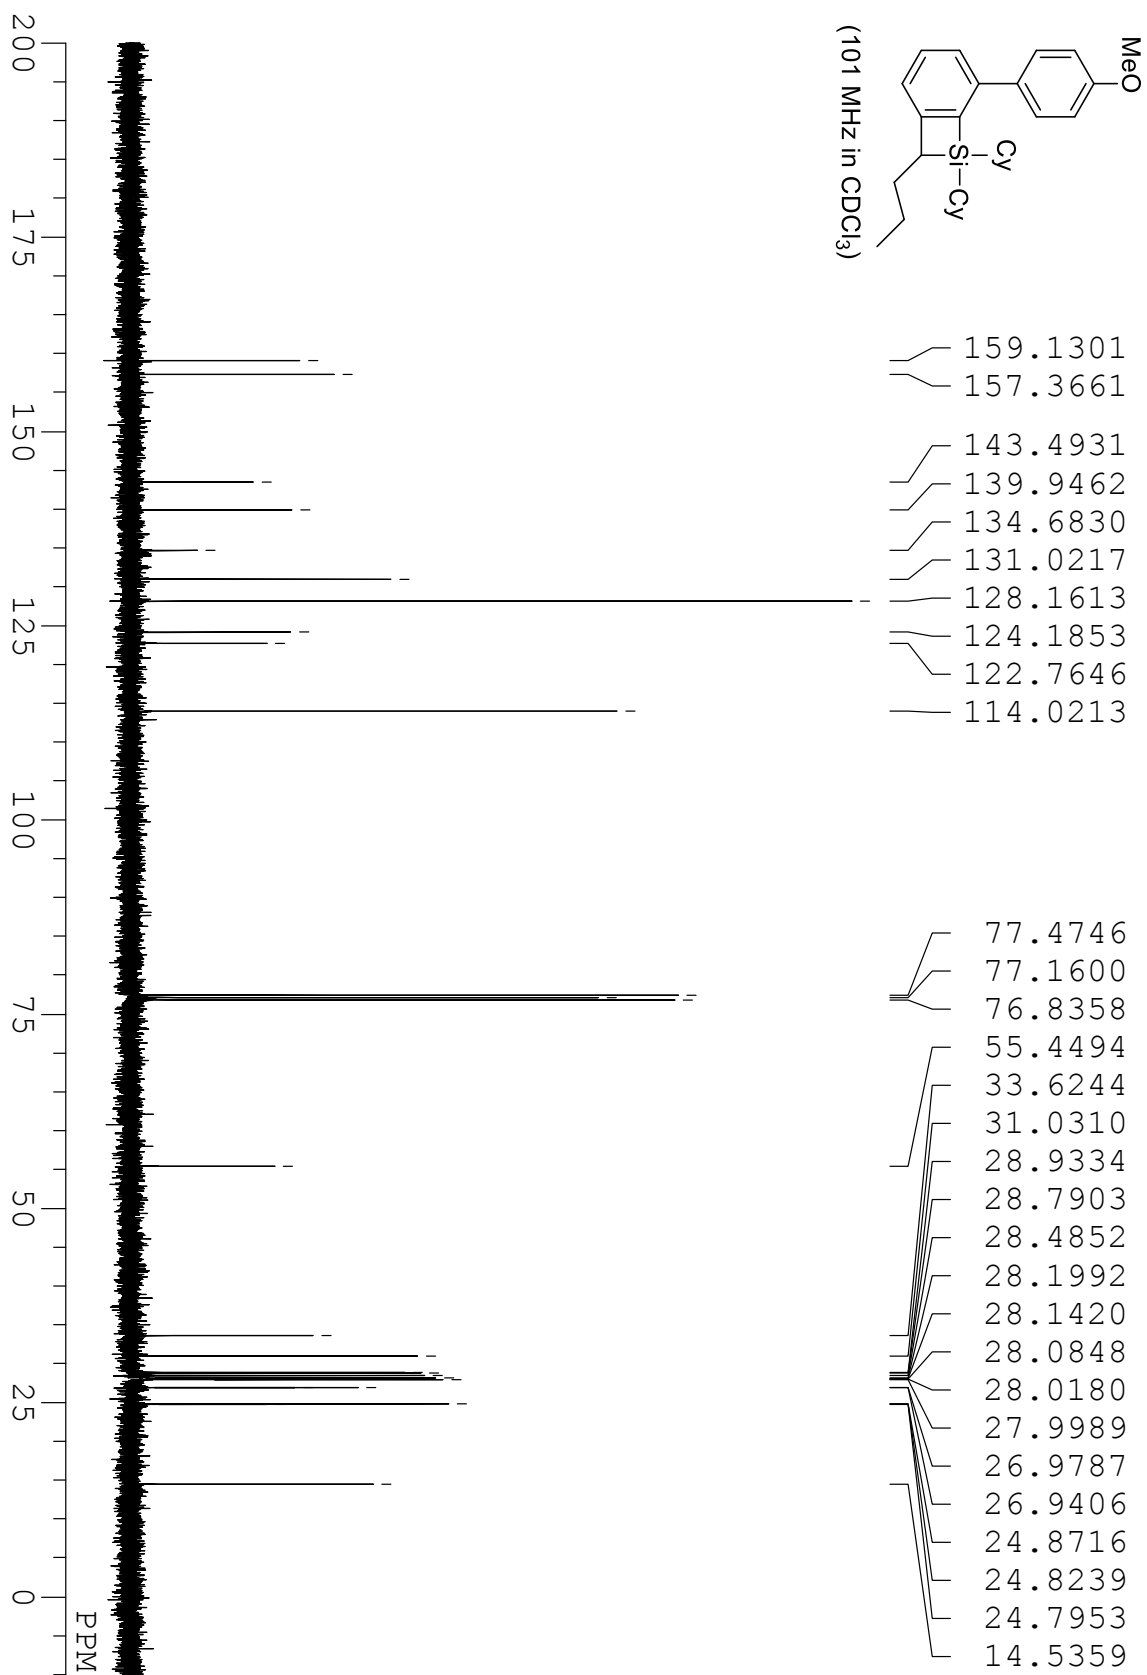

compound **2m** (91% pure)

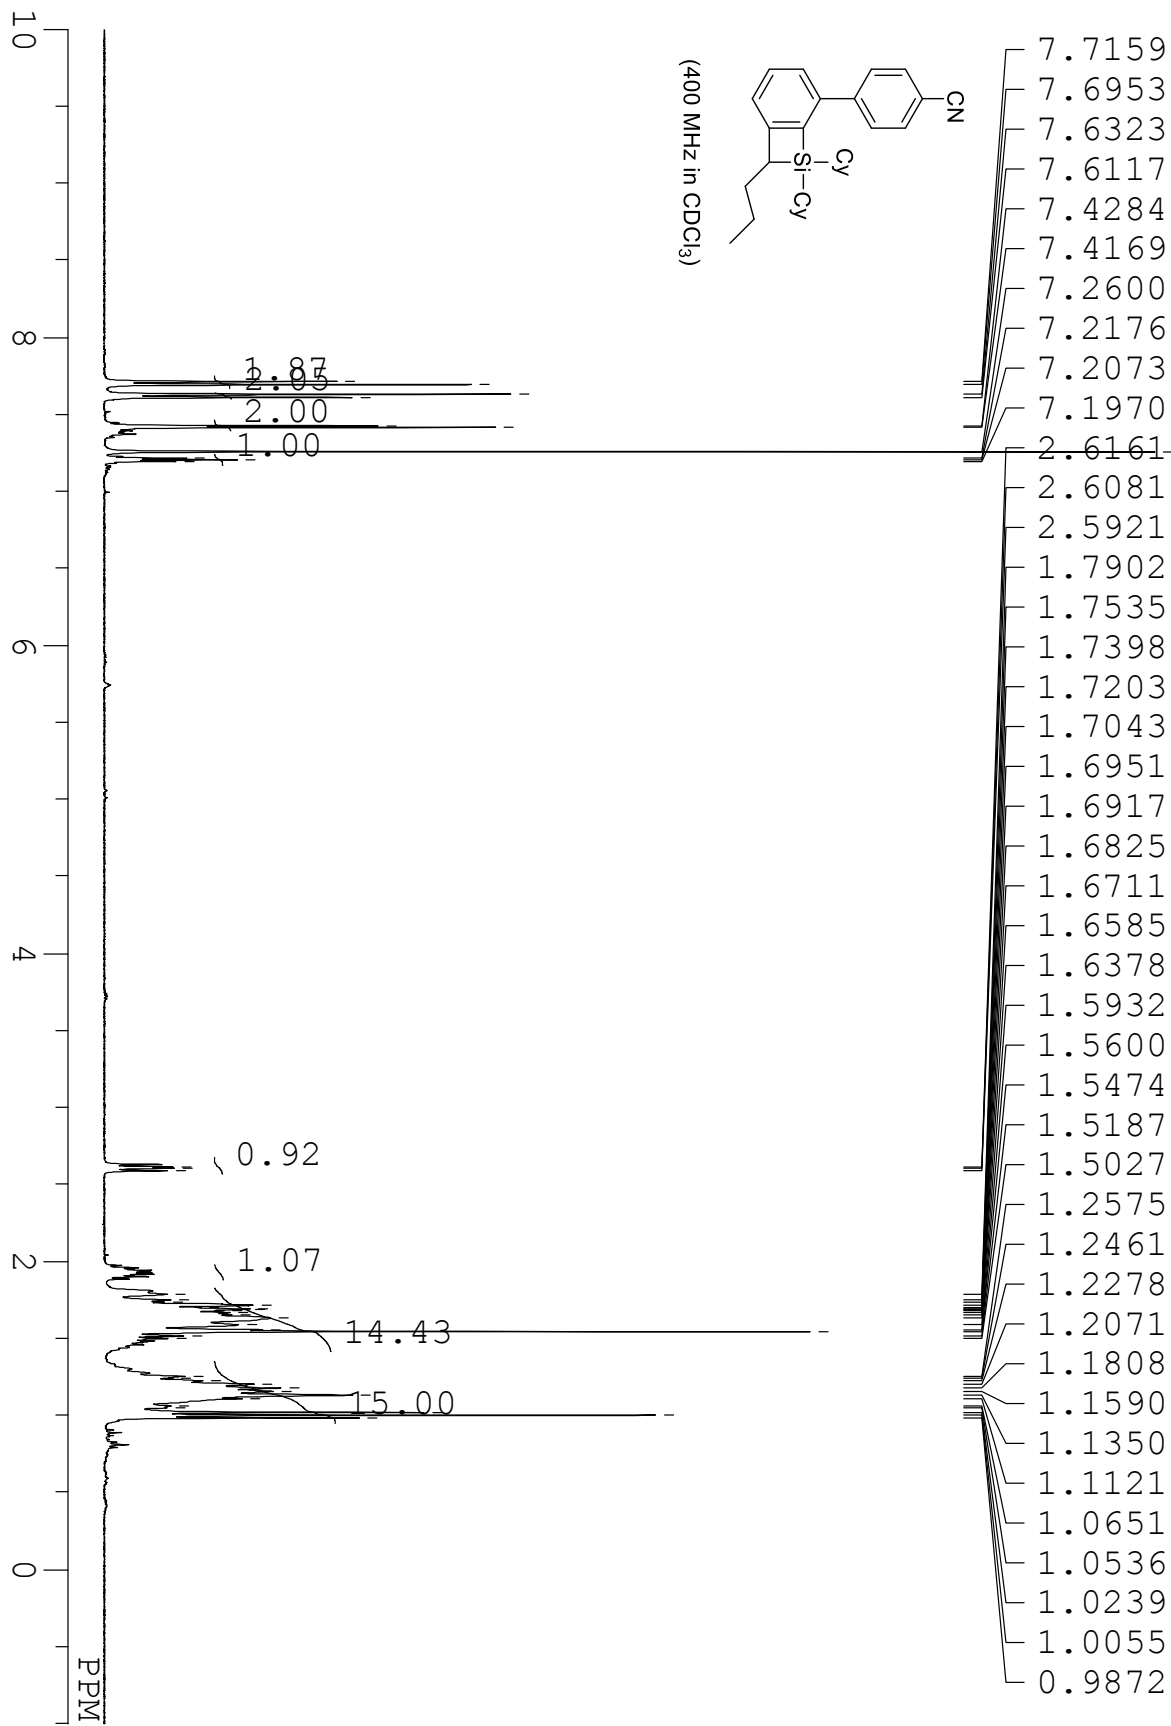

compound **2m** (91% pure)

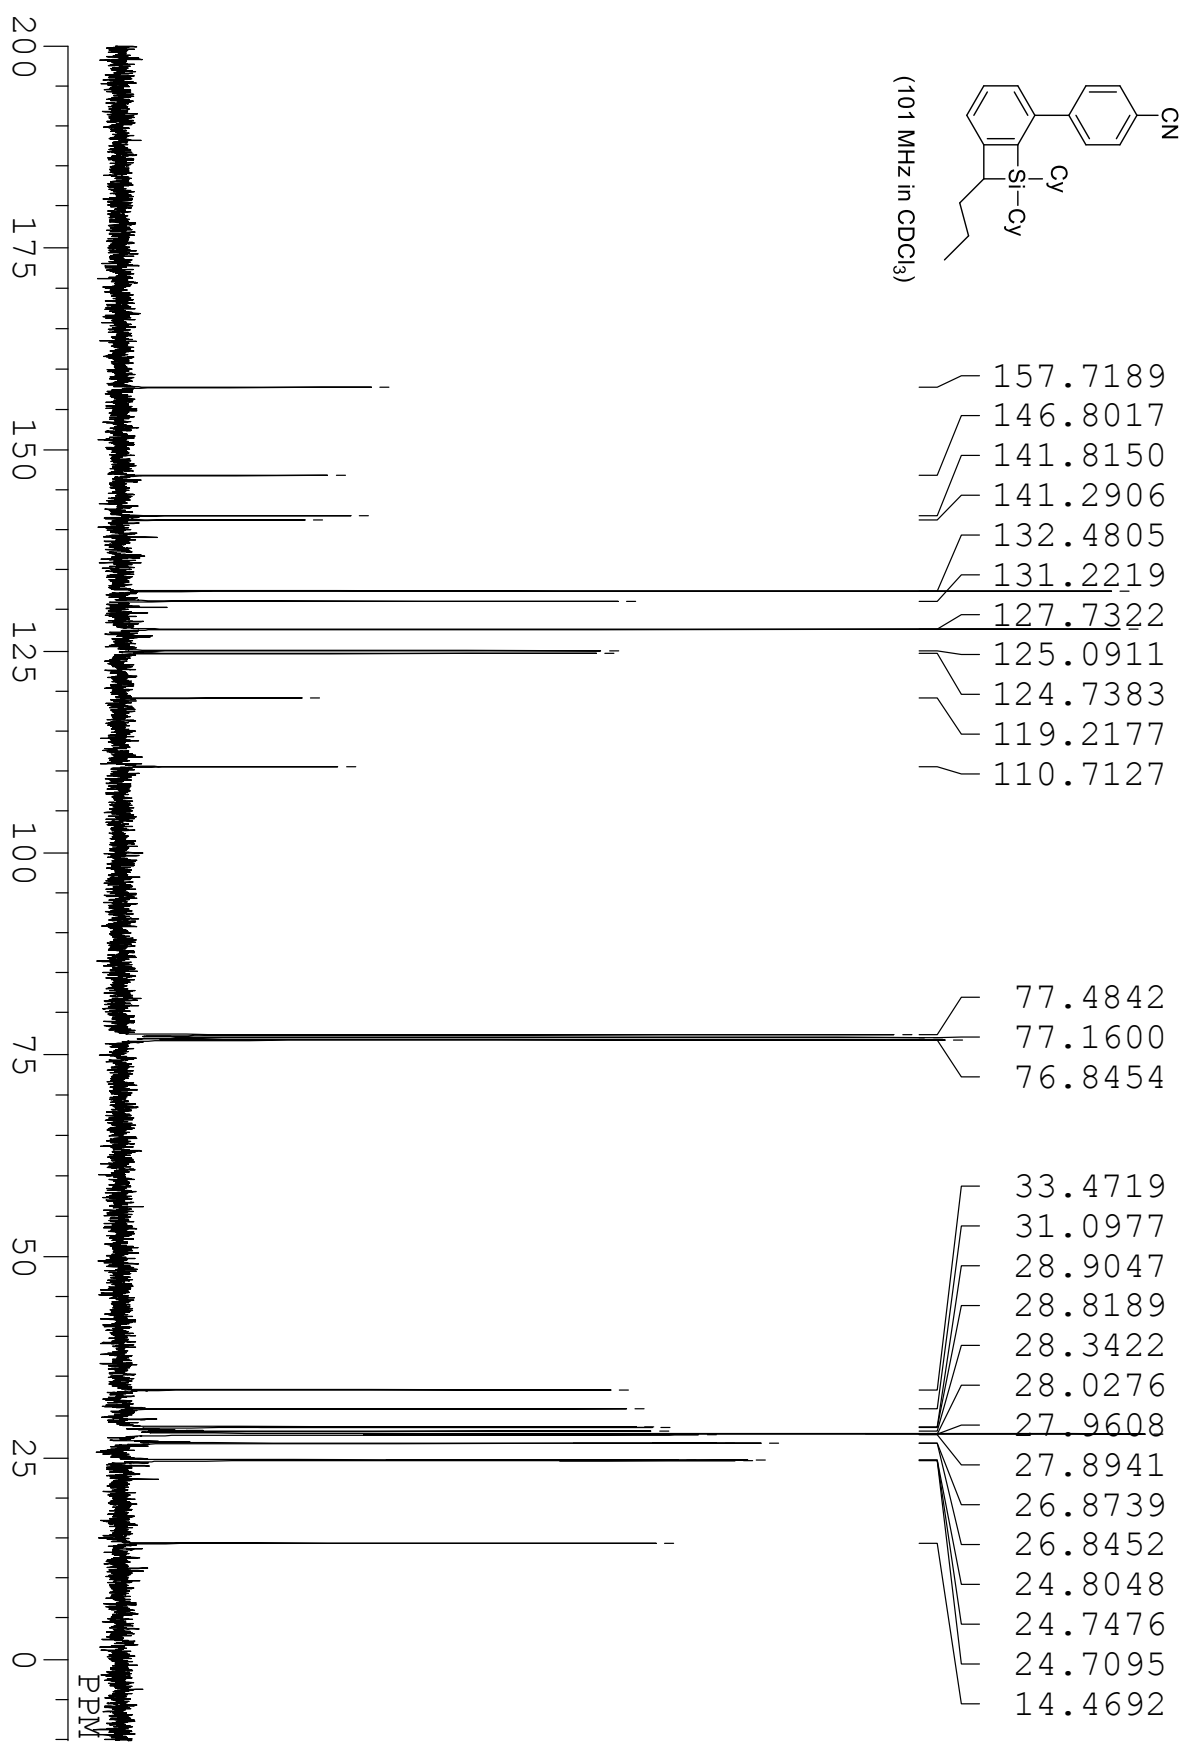

compound **2n** (94% pure)

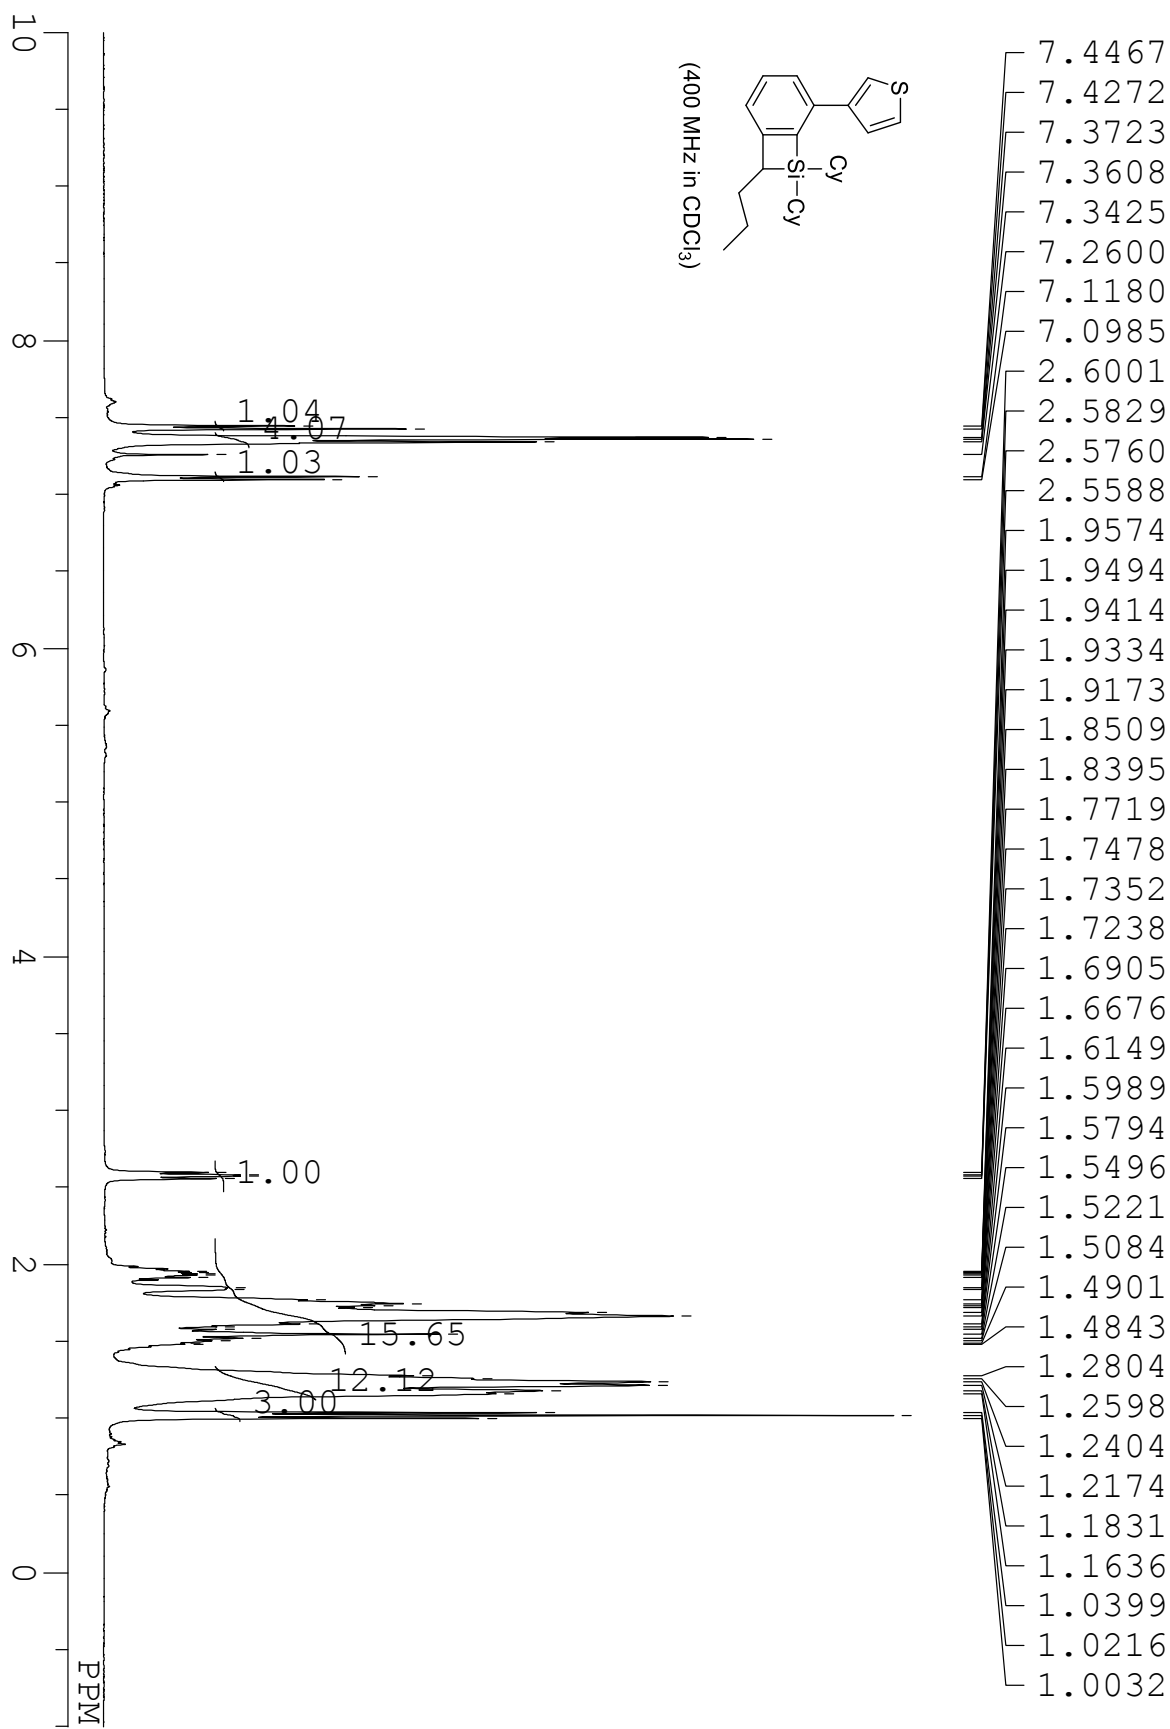

compound **2n** (94% pure)

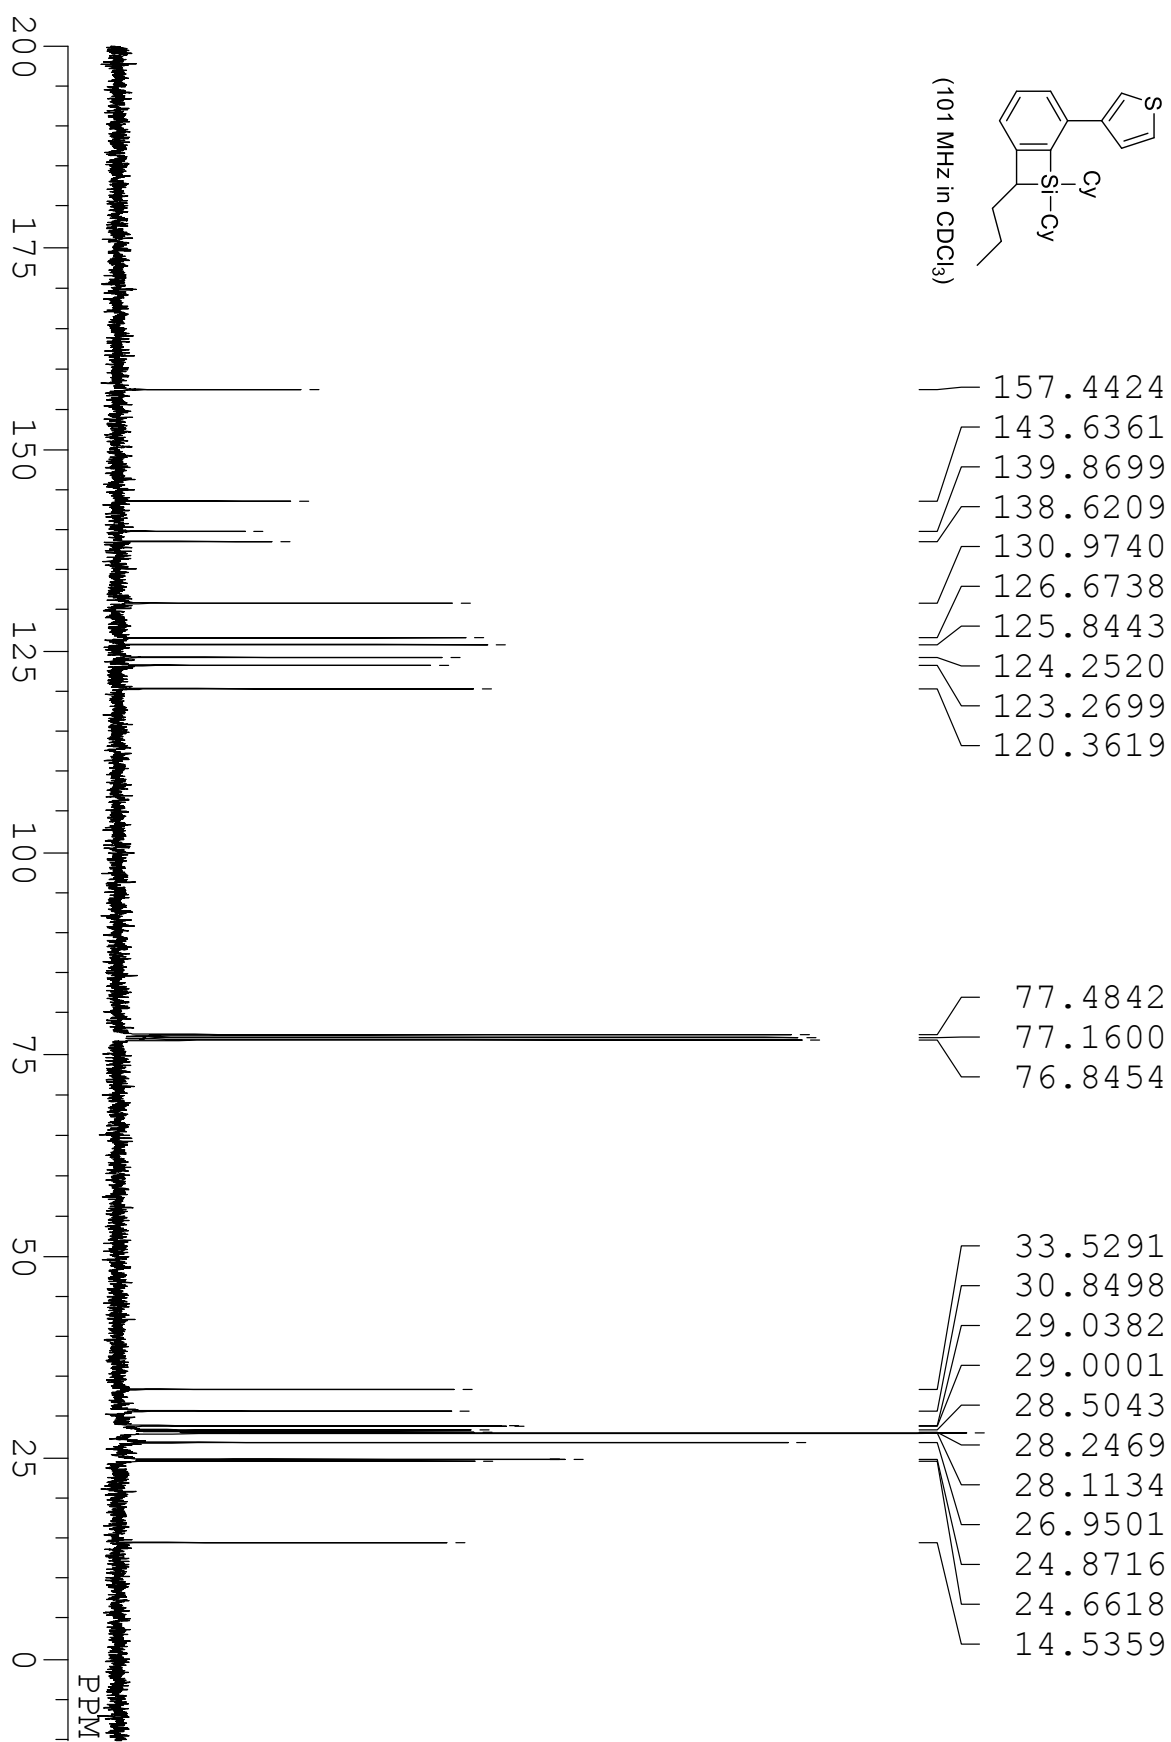



compound **2o** (95% pure)

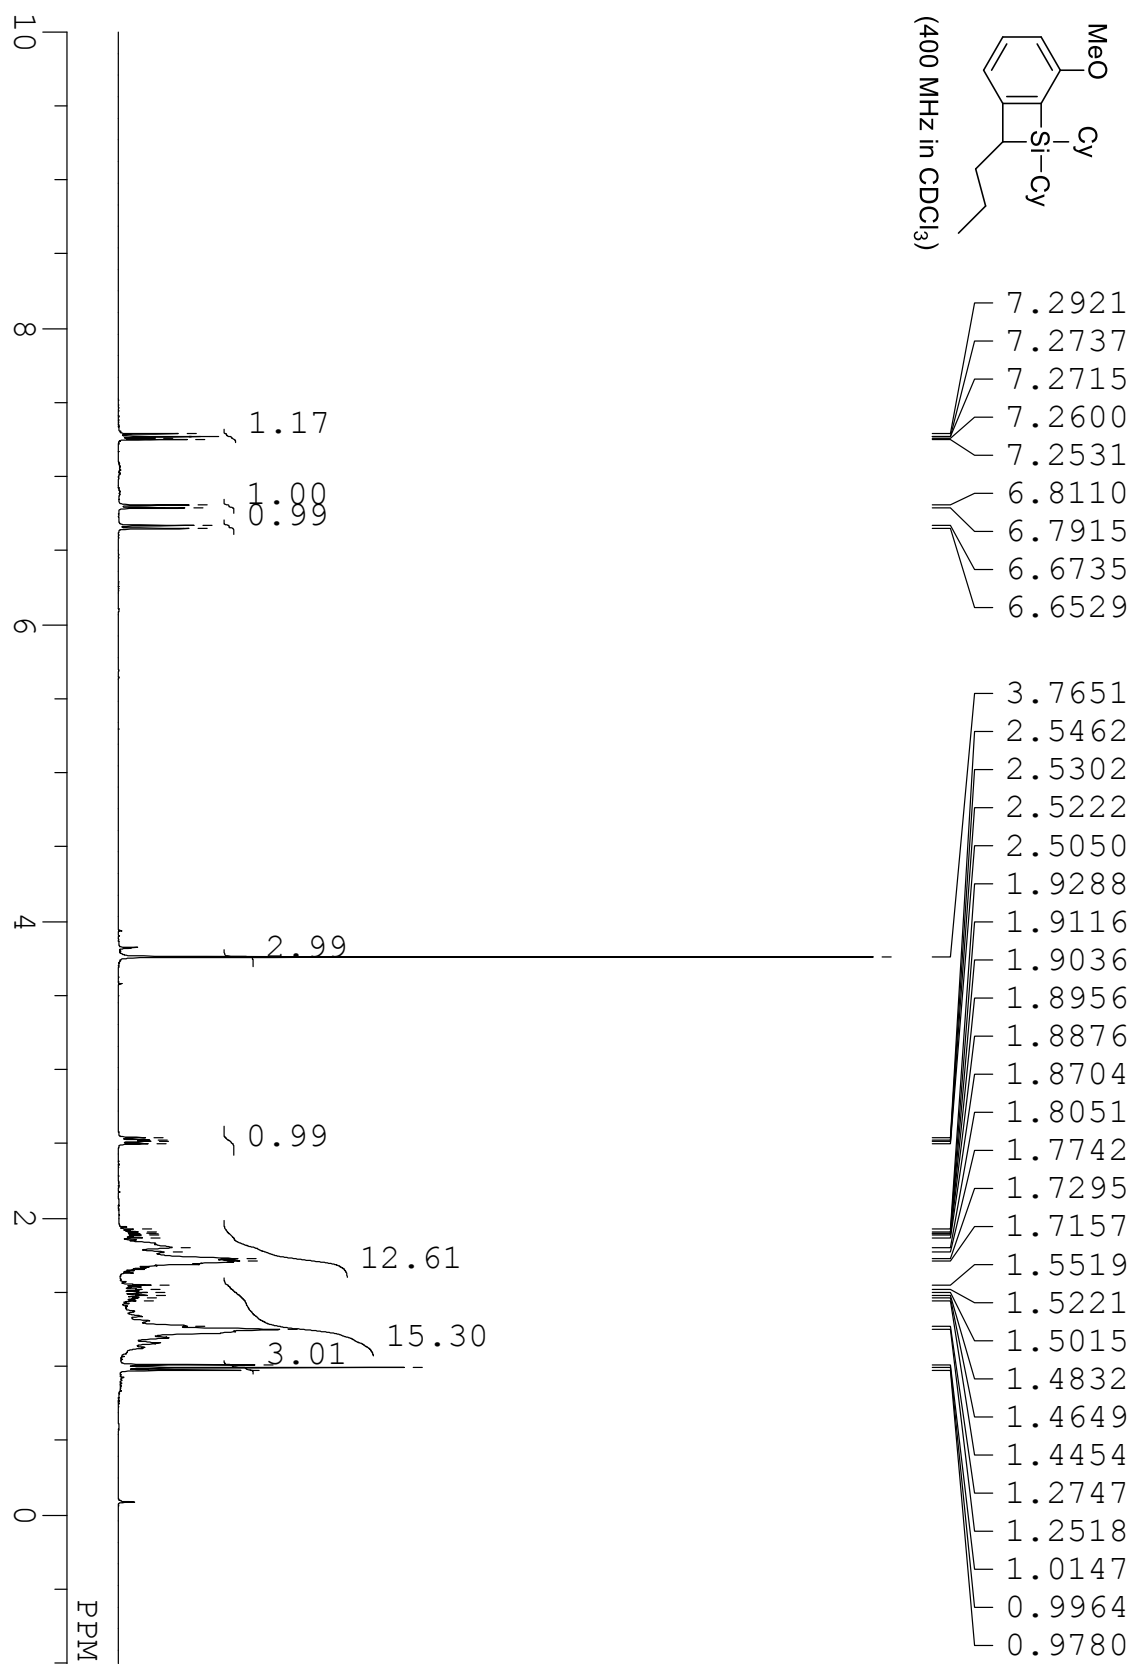

compound **2o** (95% pure)

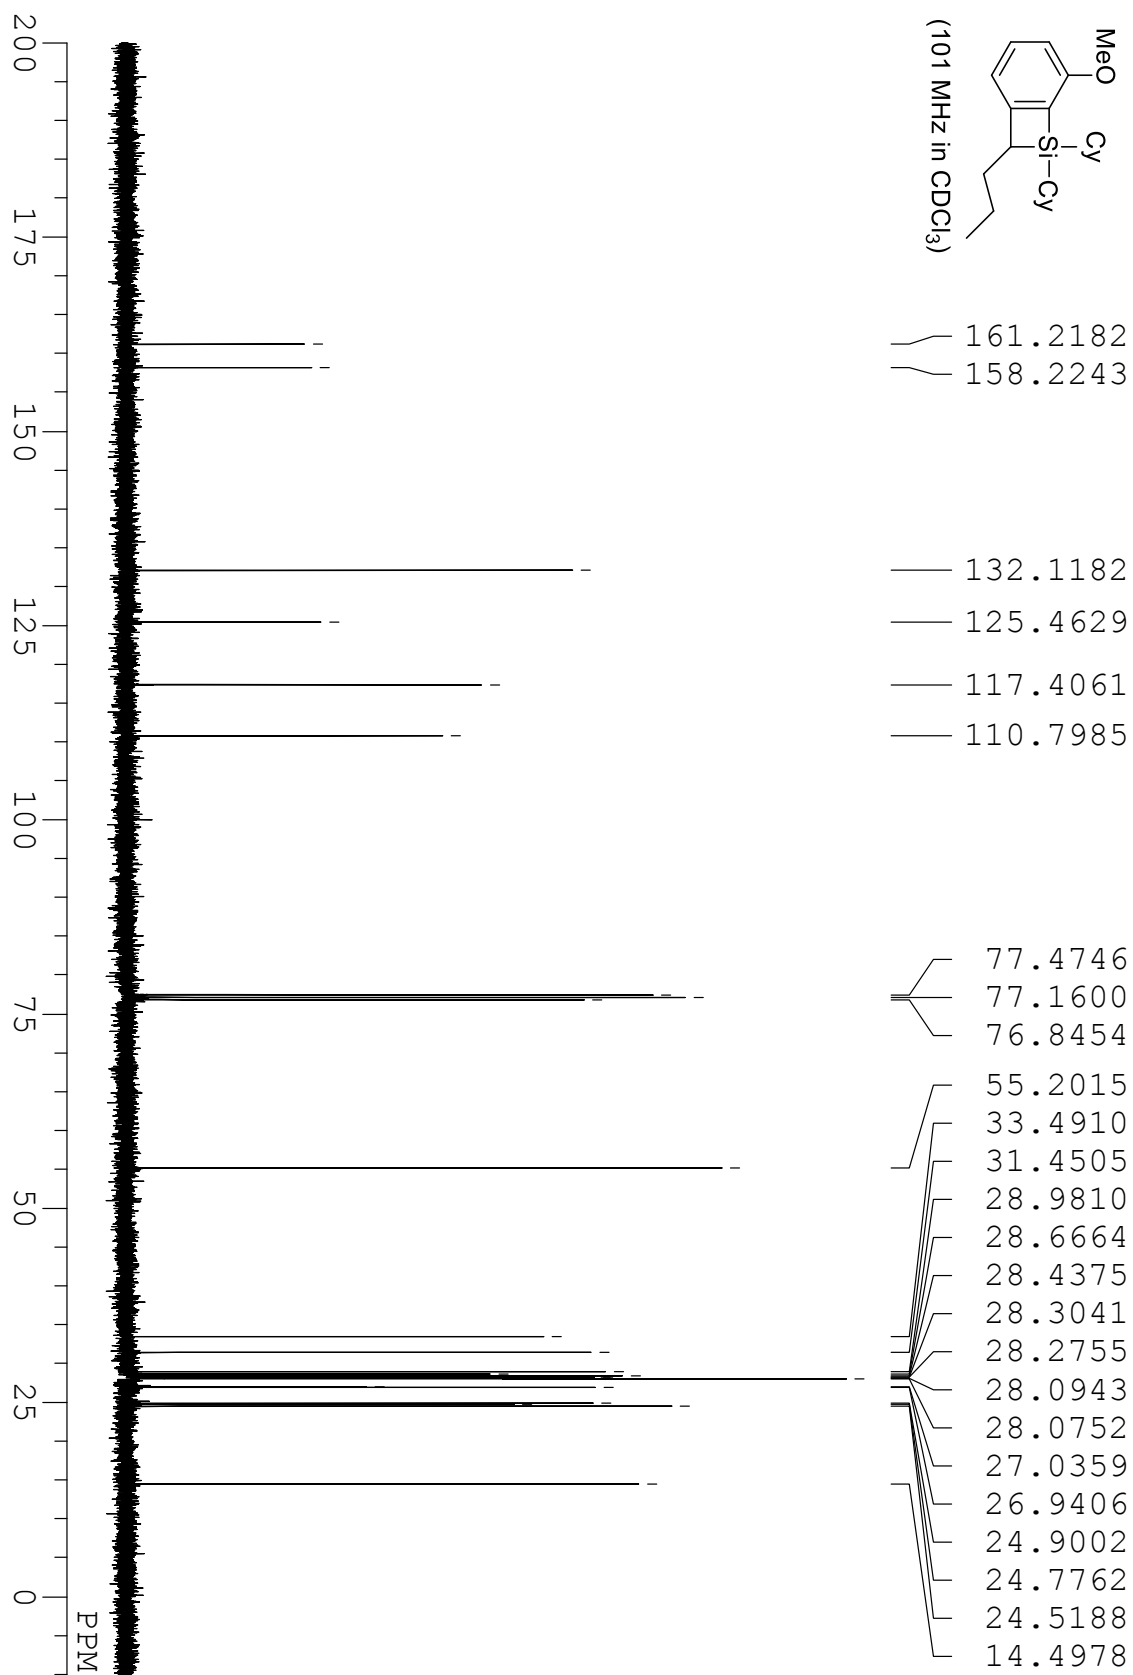

compound **2p**

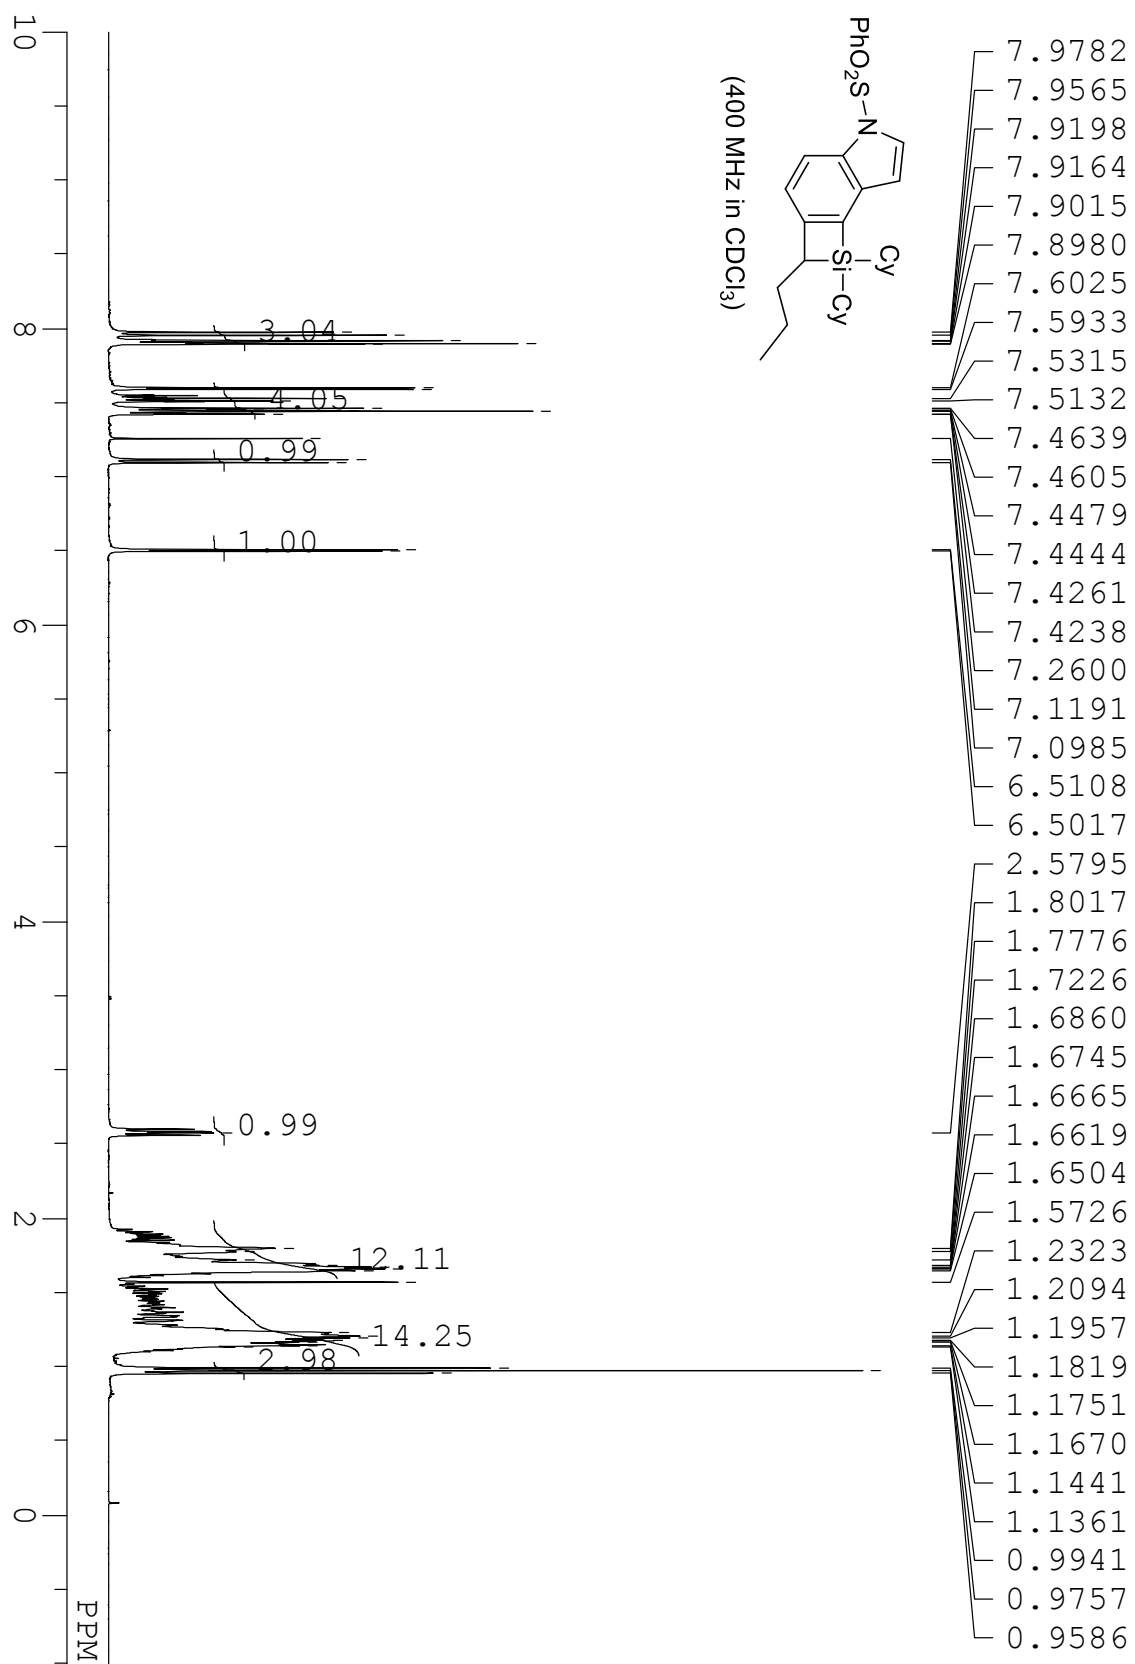

compound 2p

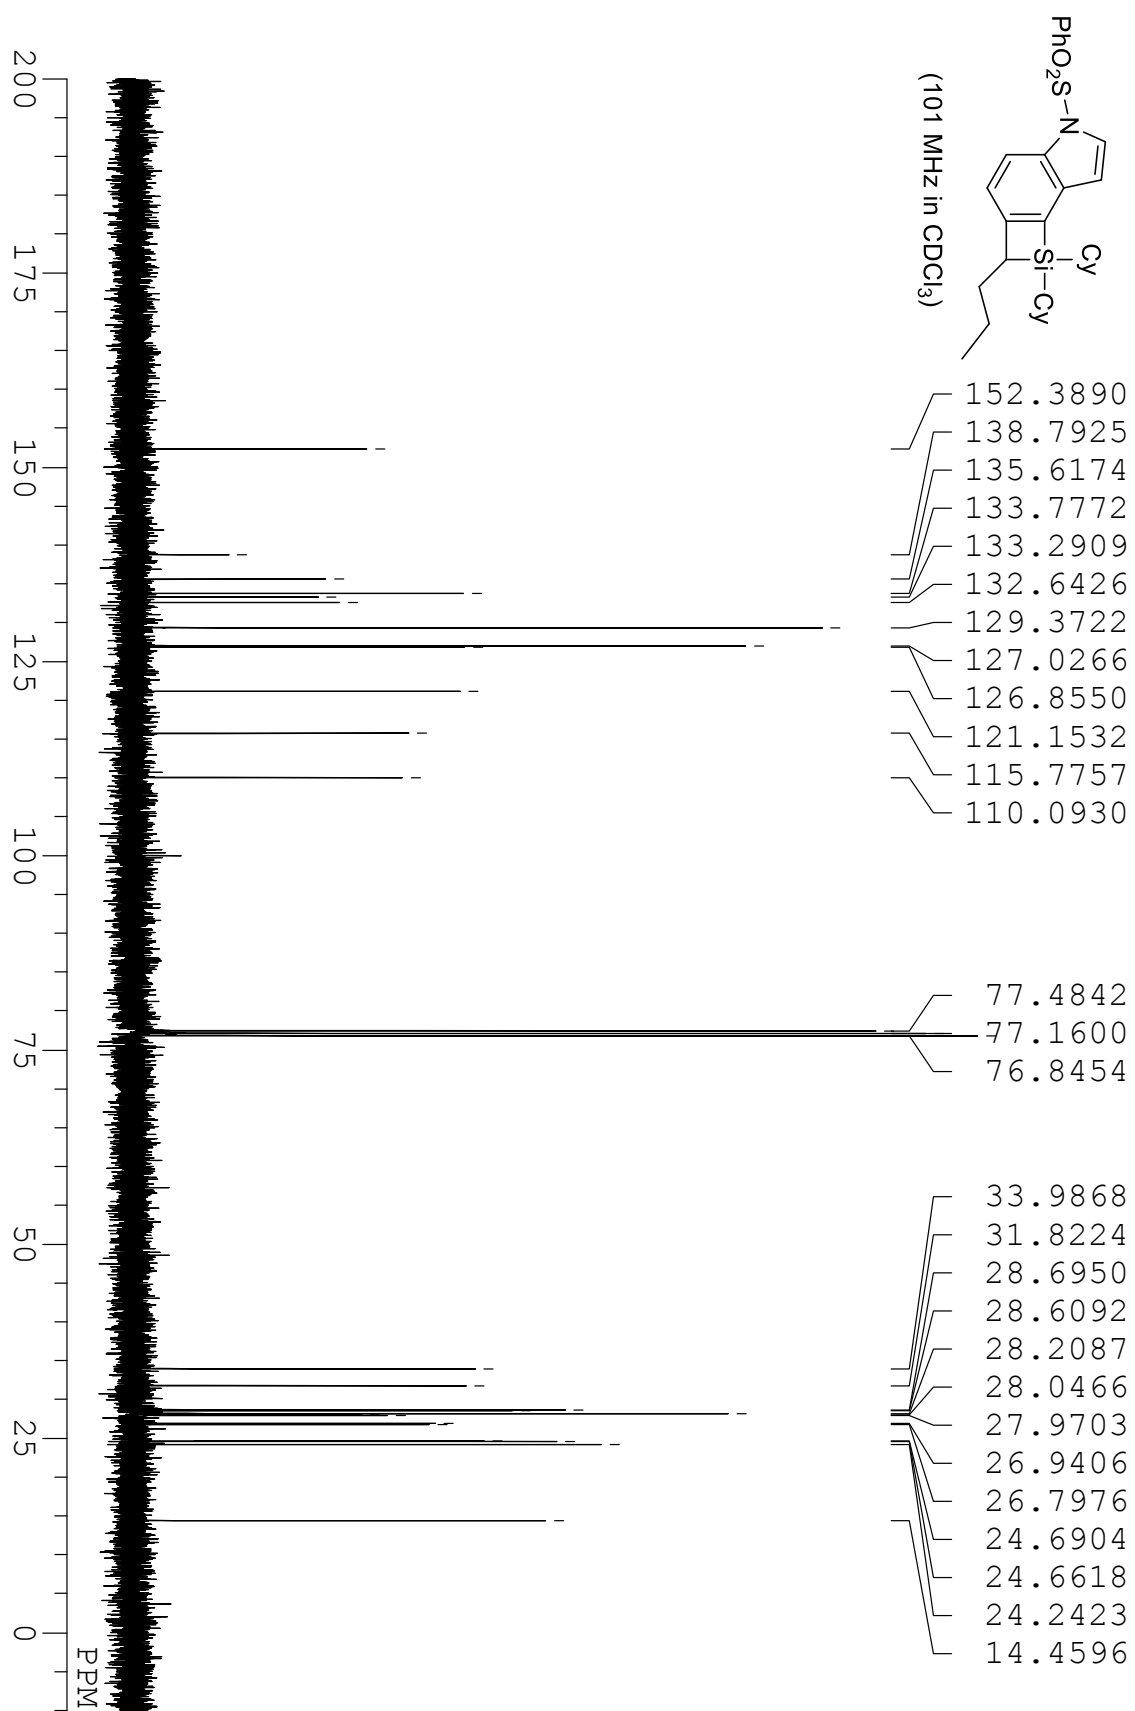

compound **2q**

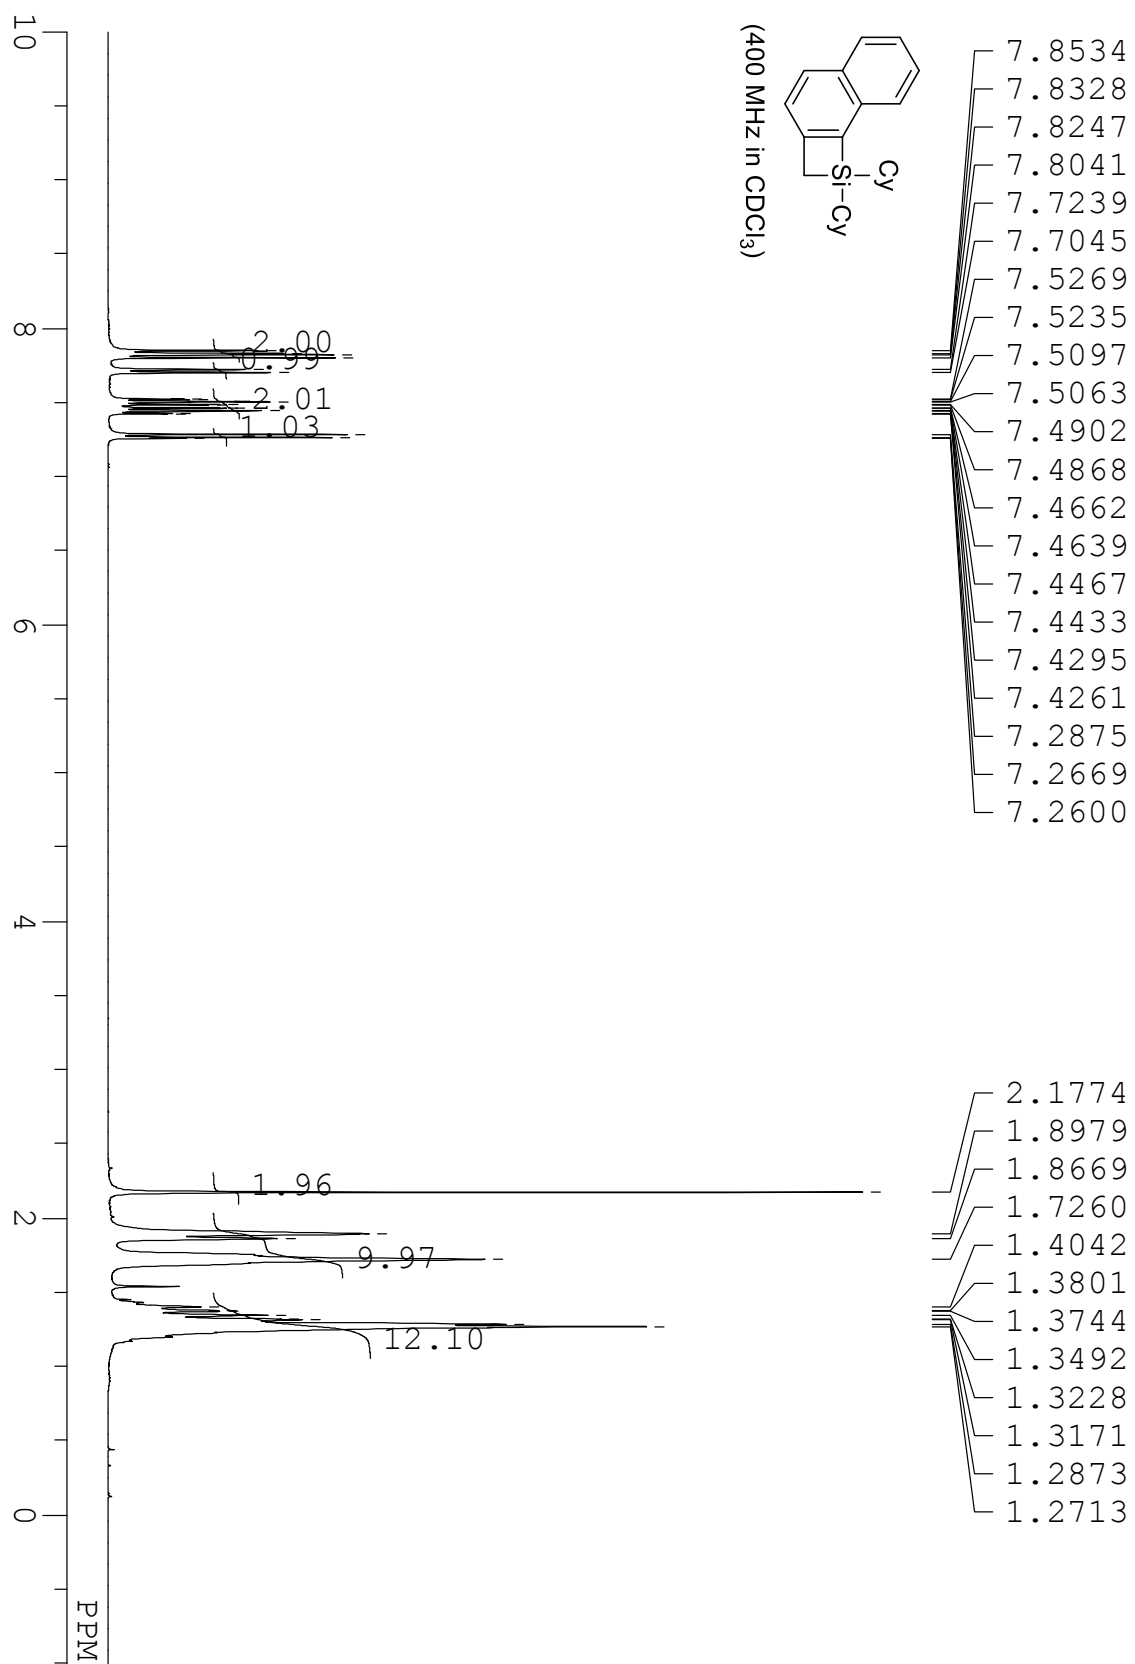

compound 2q

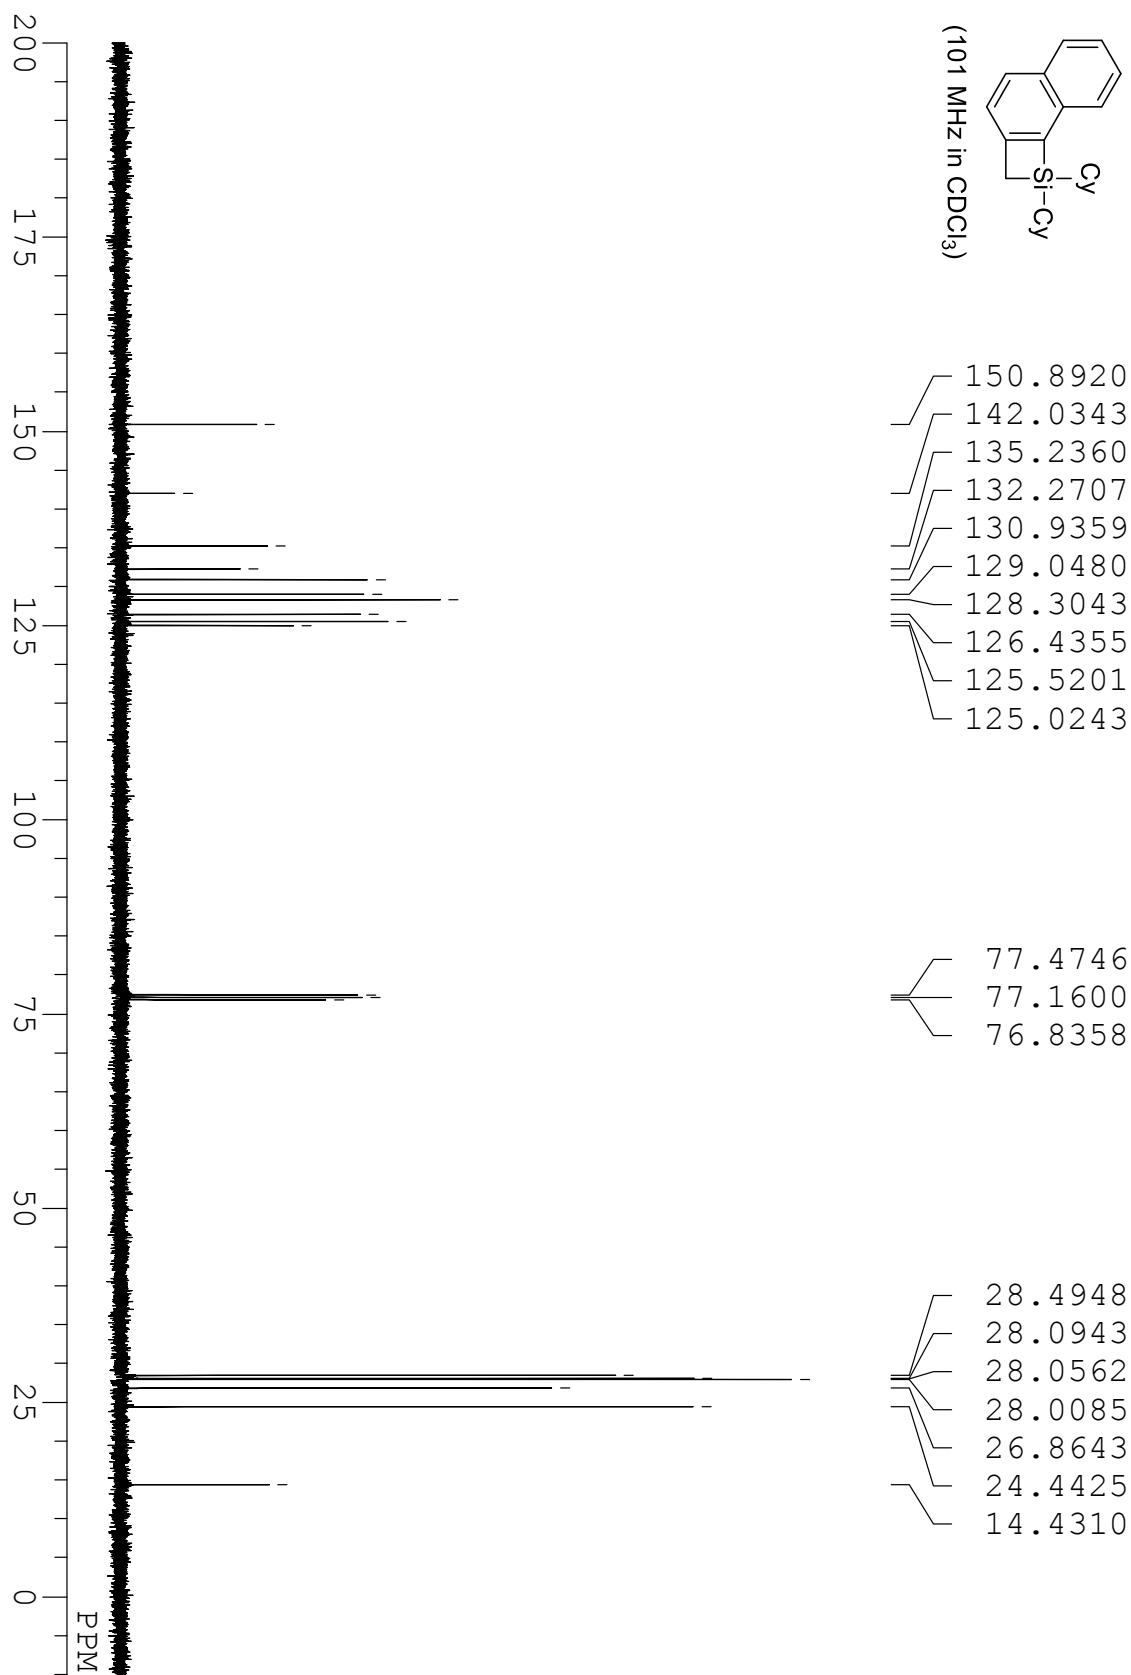

compound 2r

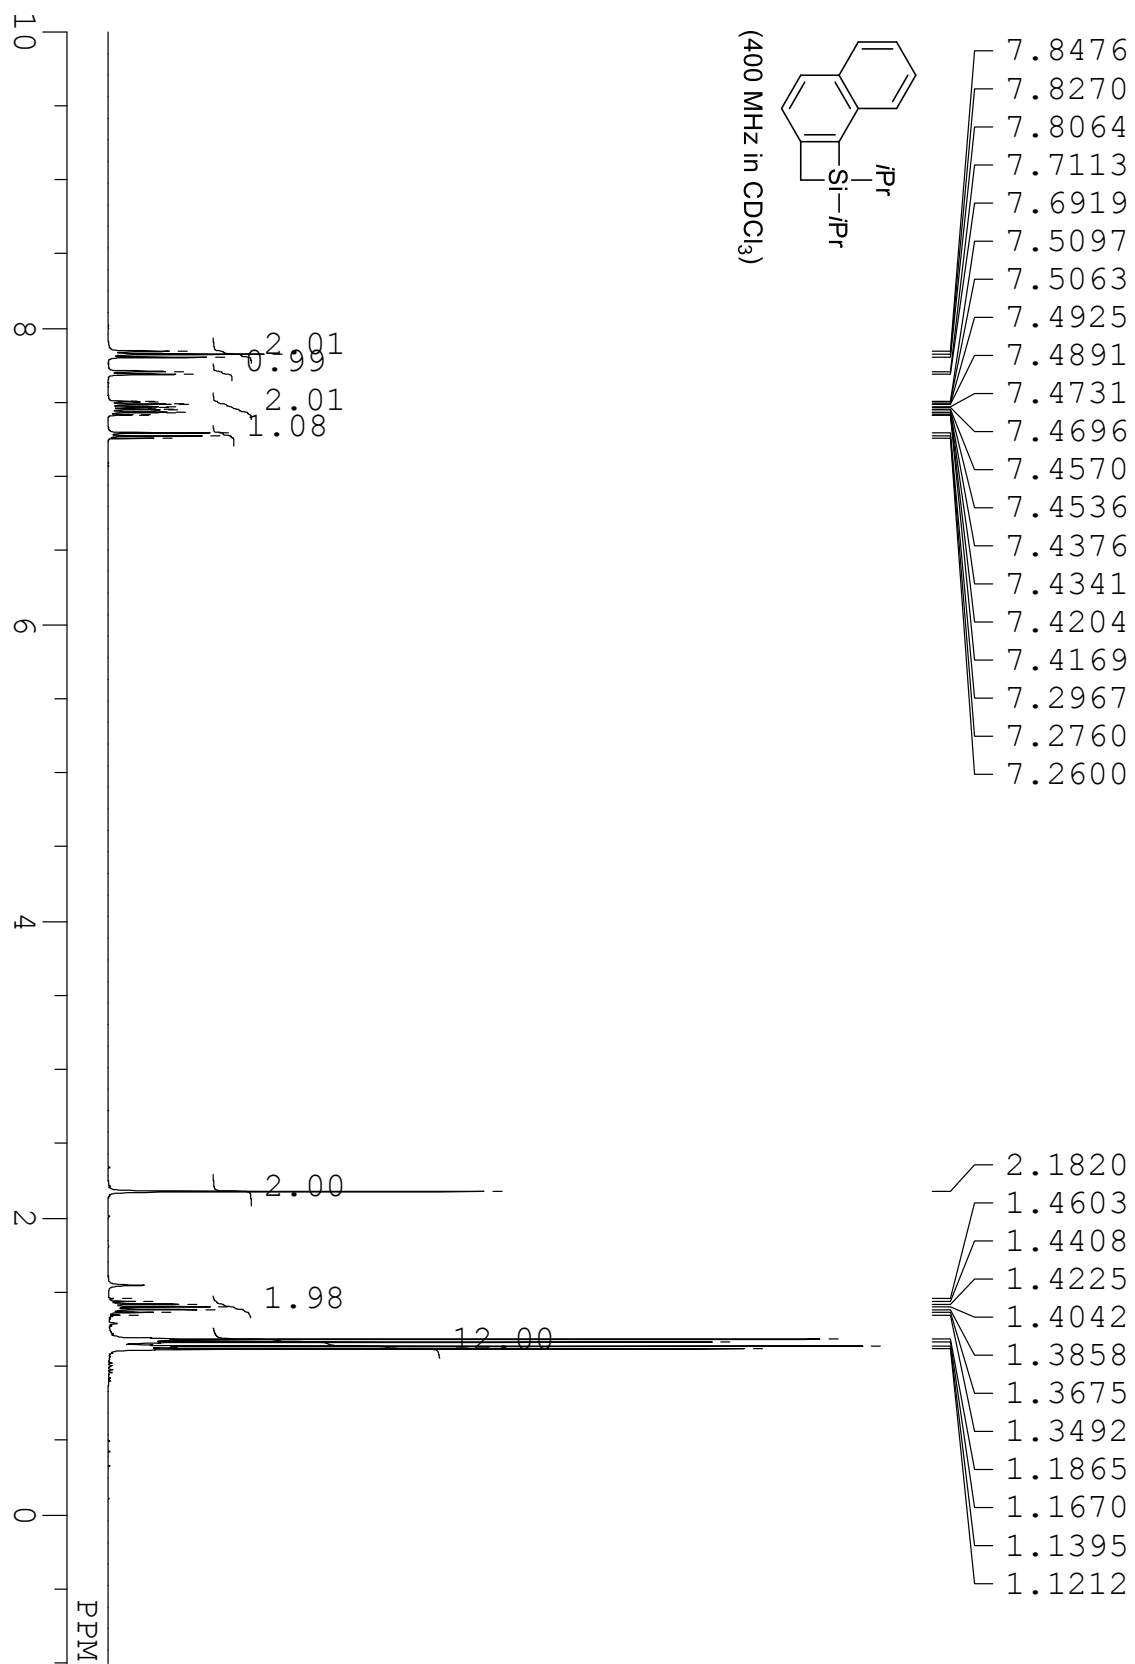

compound 2r

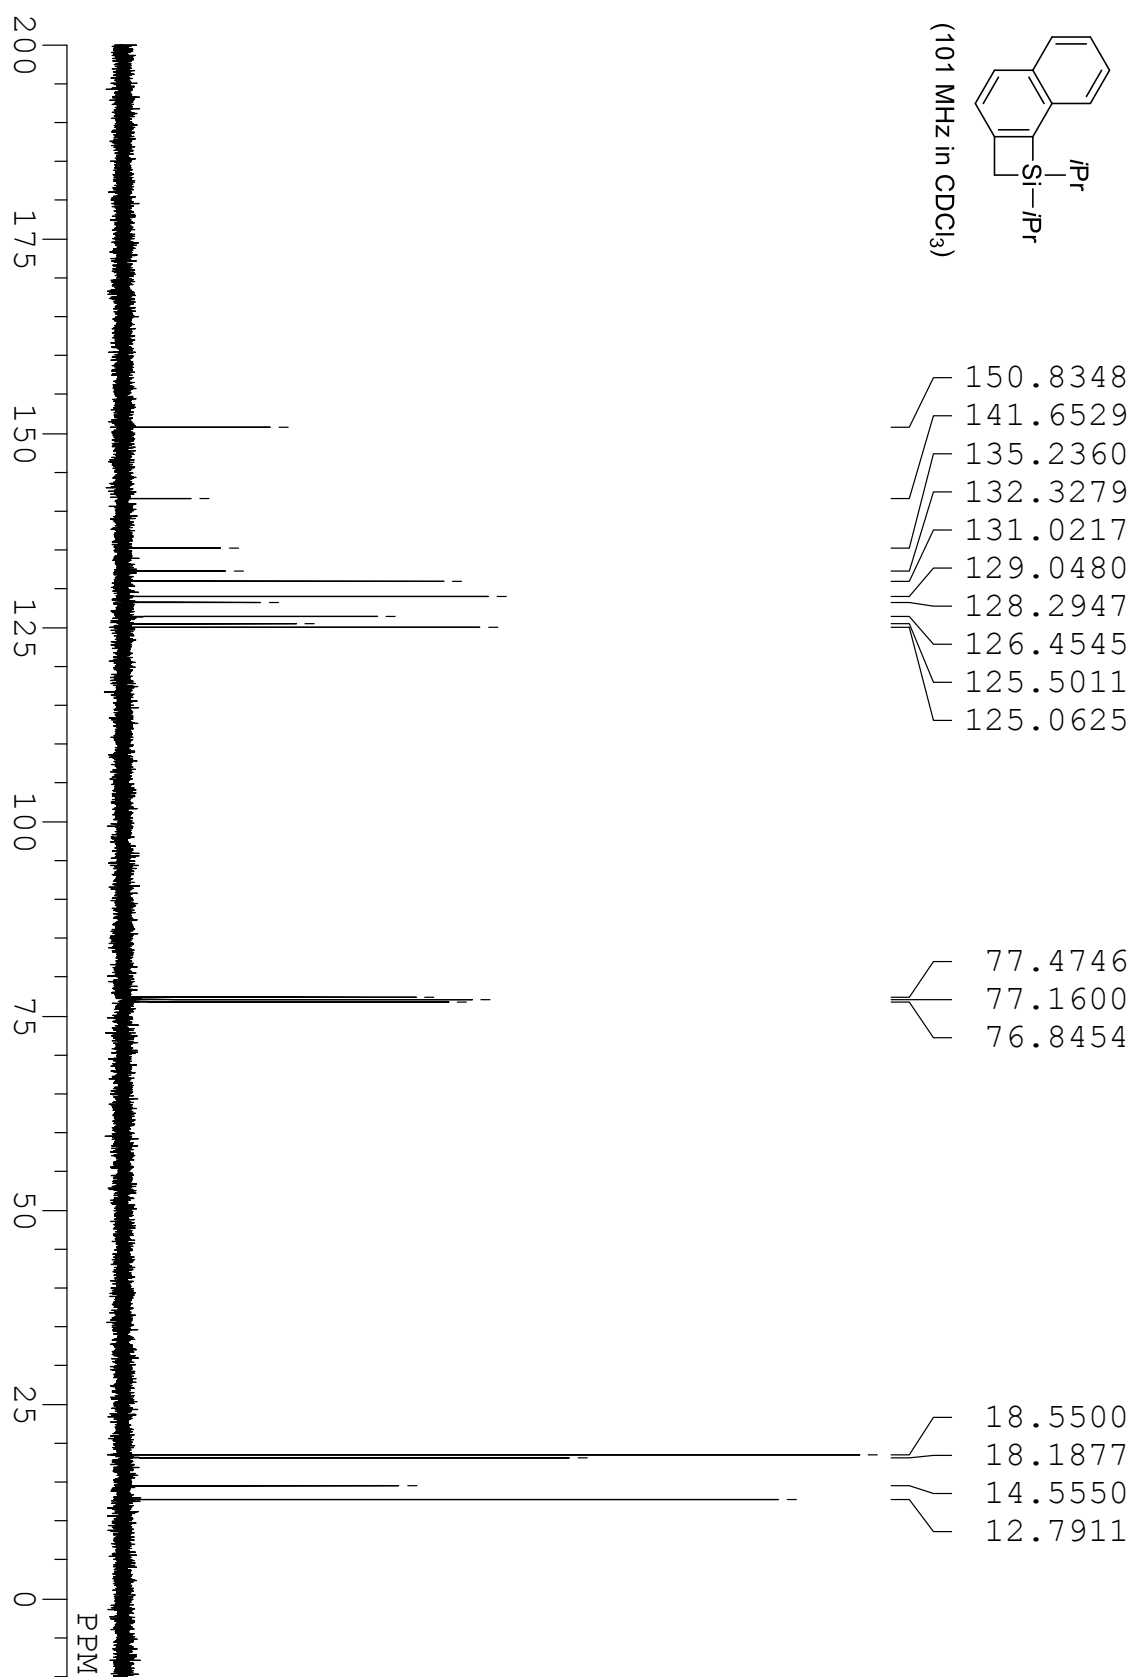



compound 2s

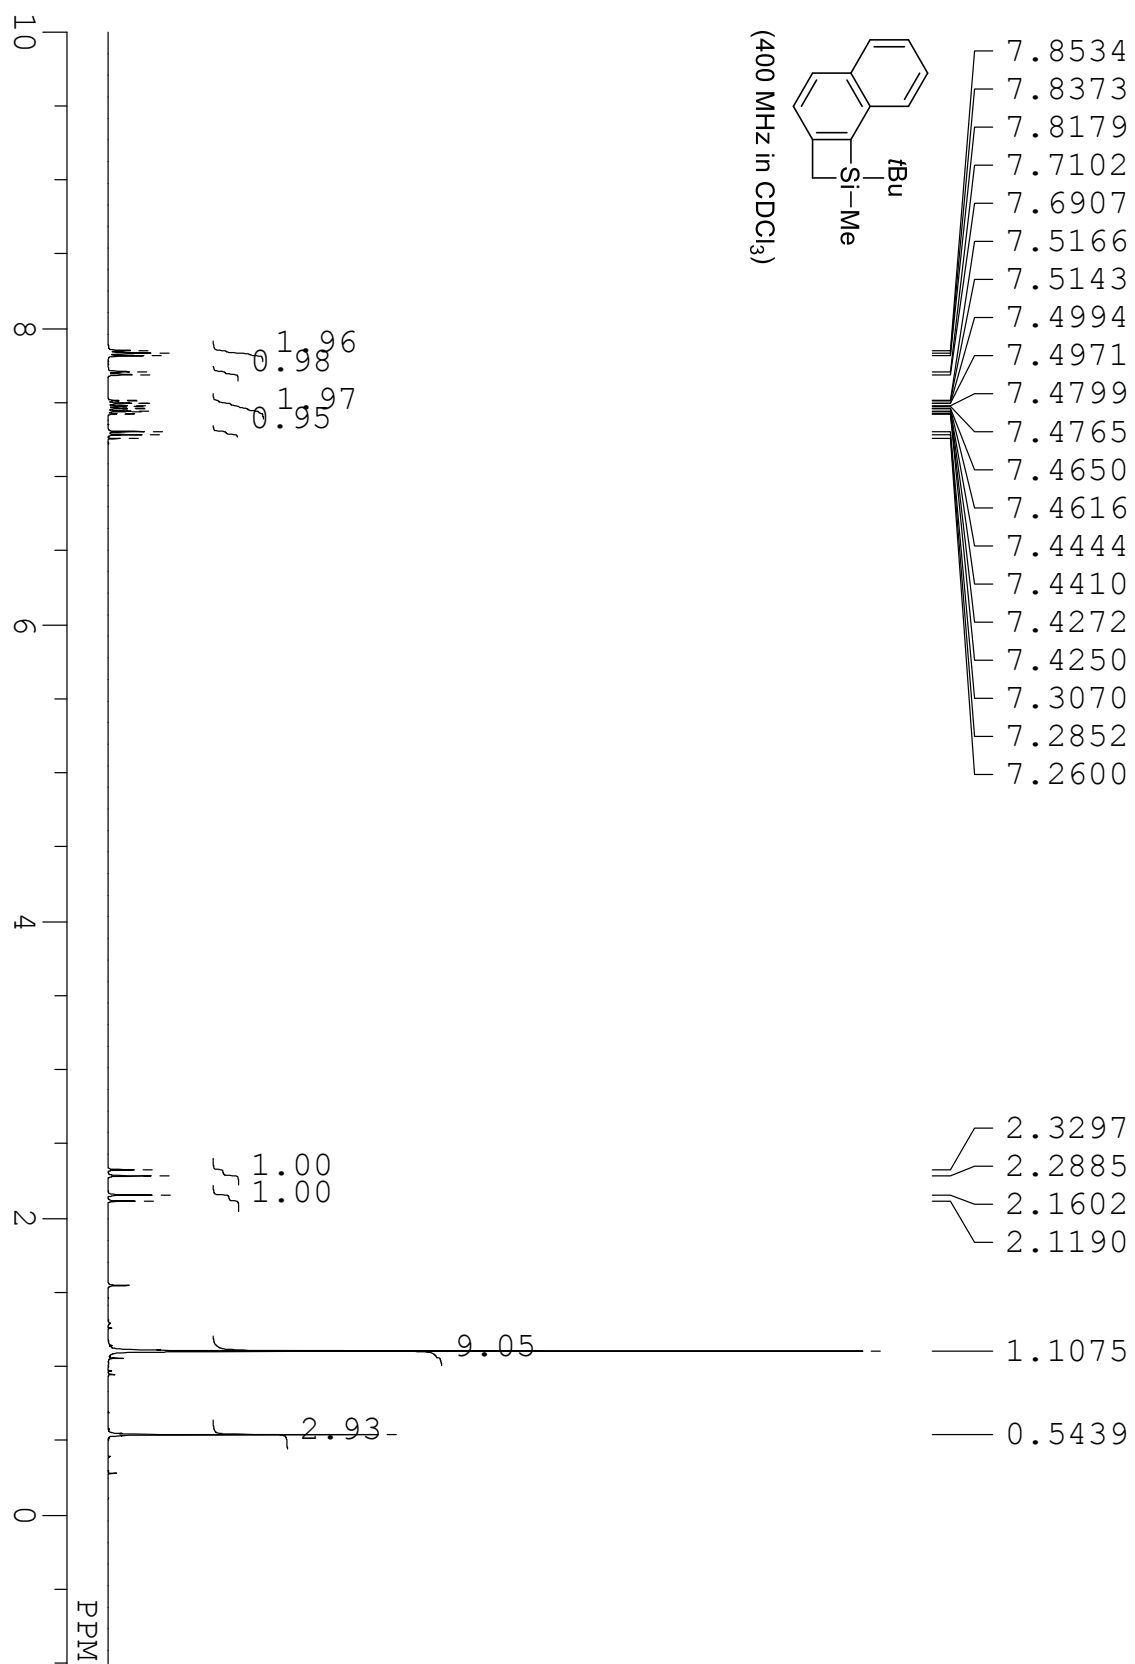

compound 2s

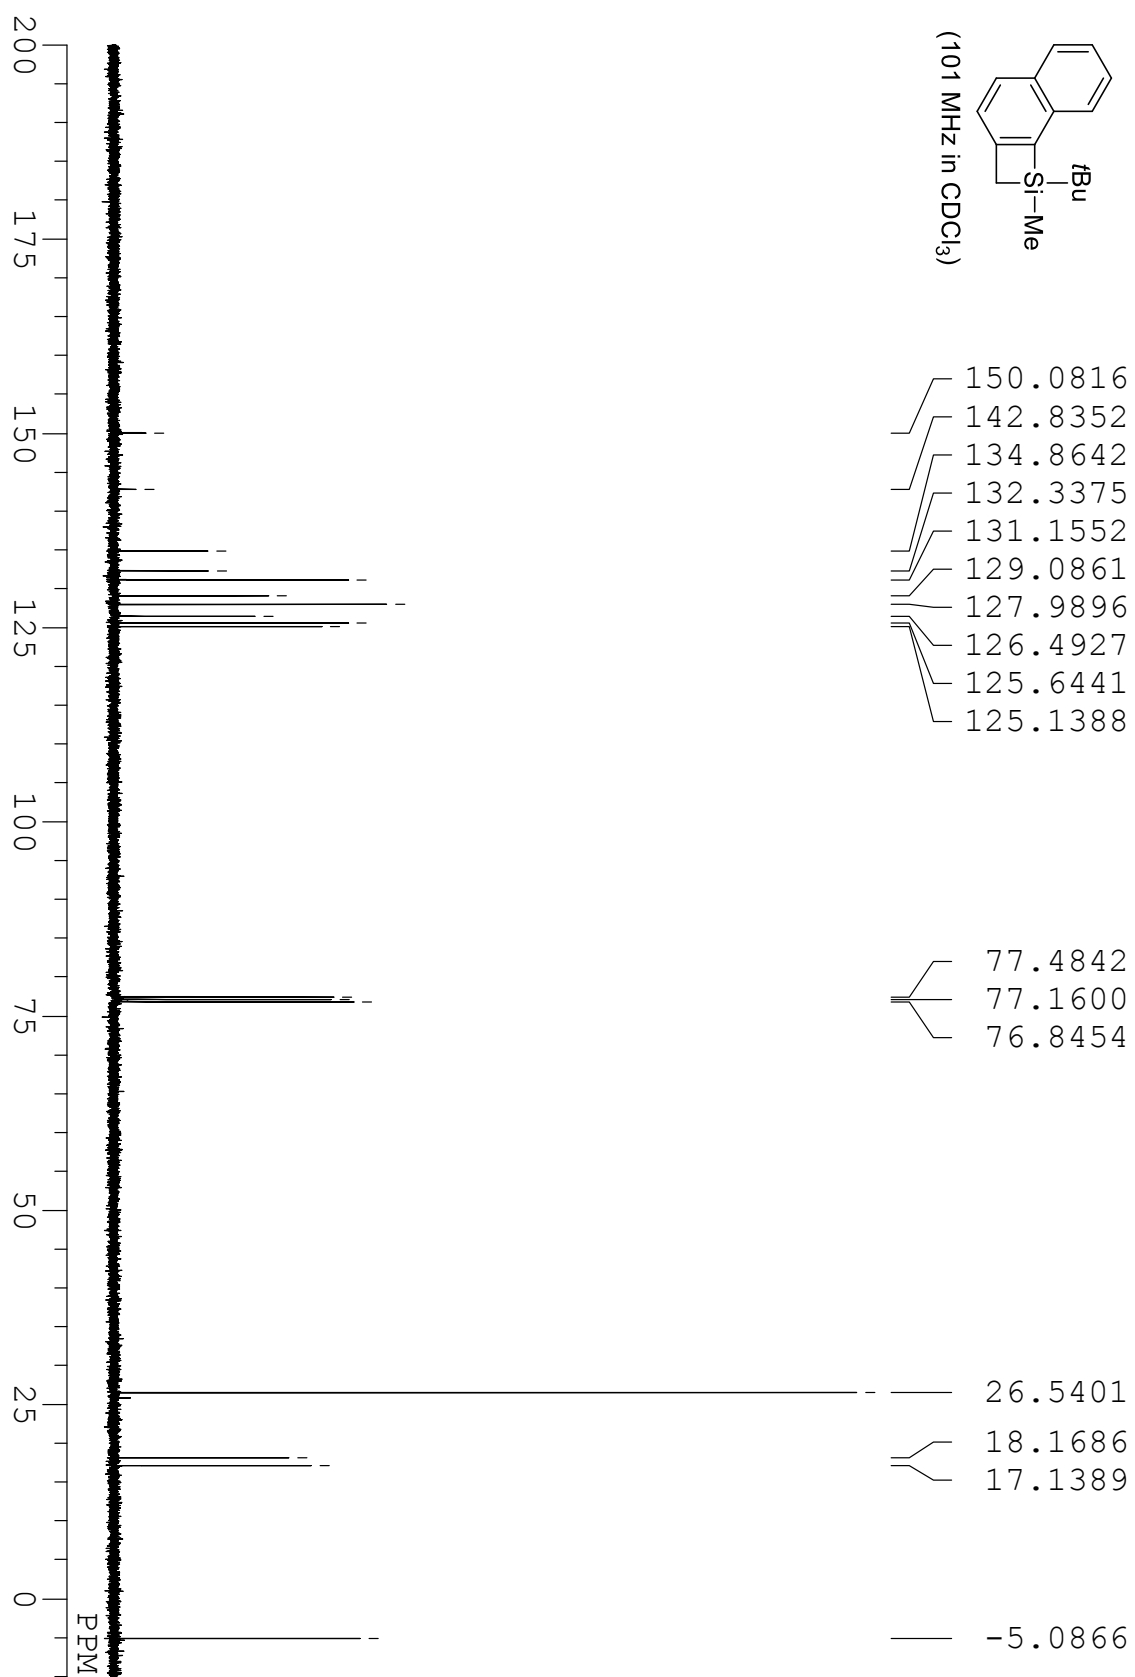

compound **2t** (96% pure)

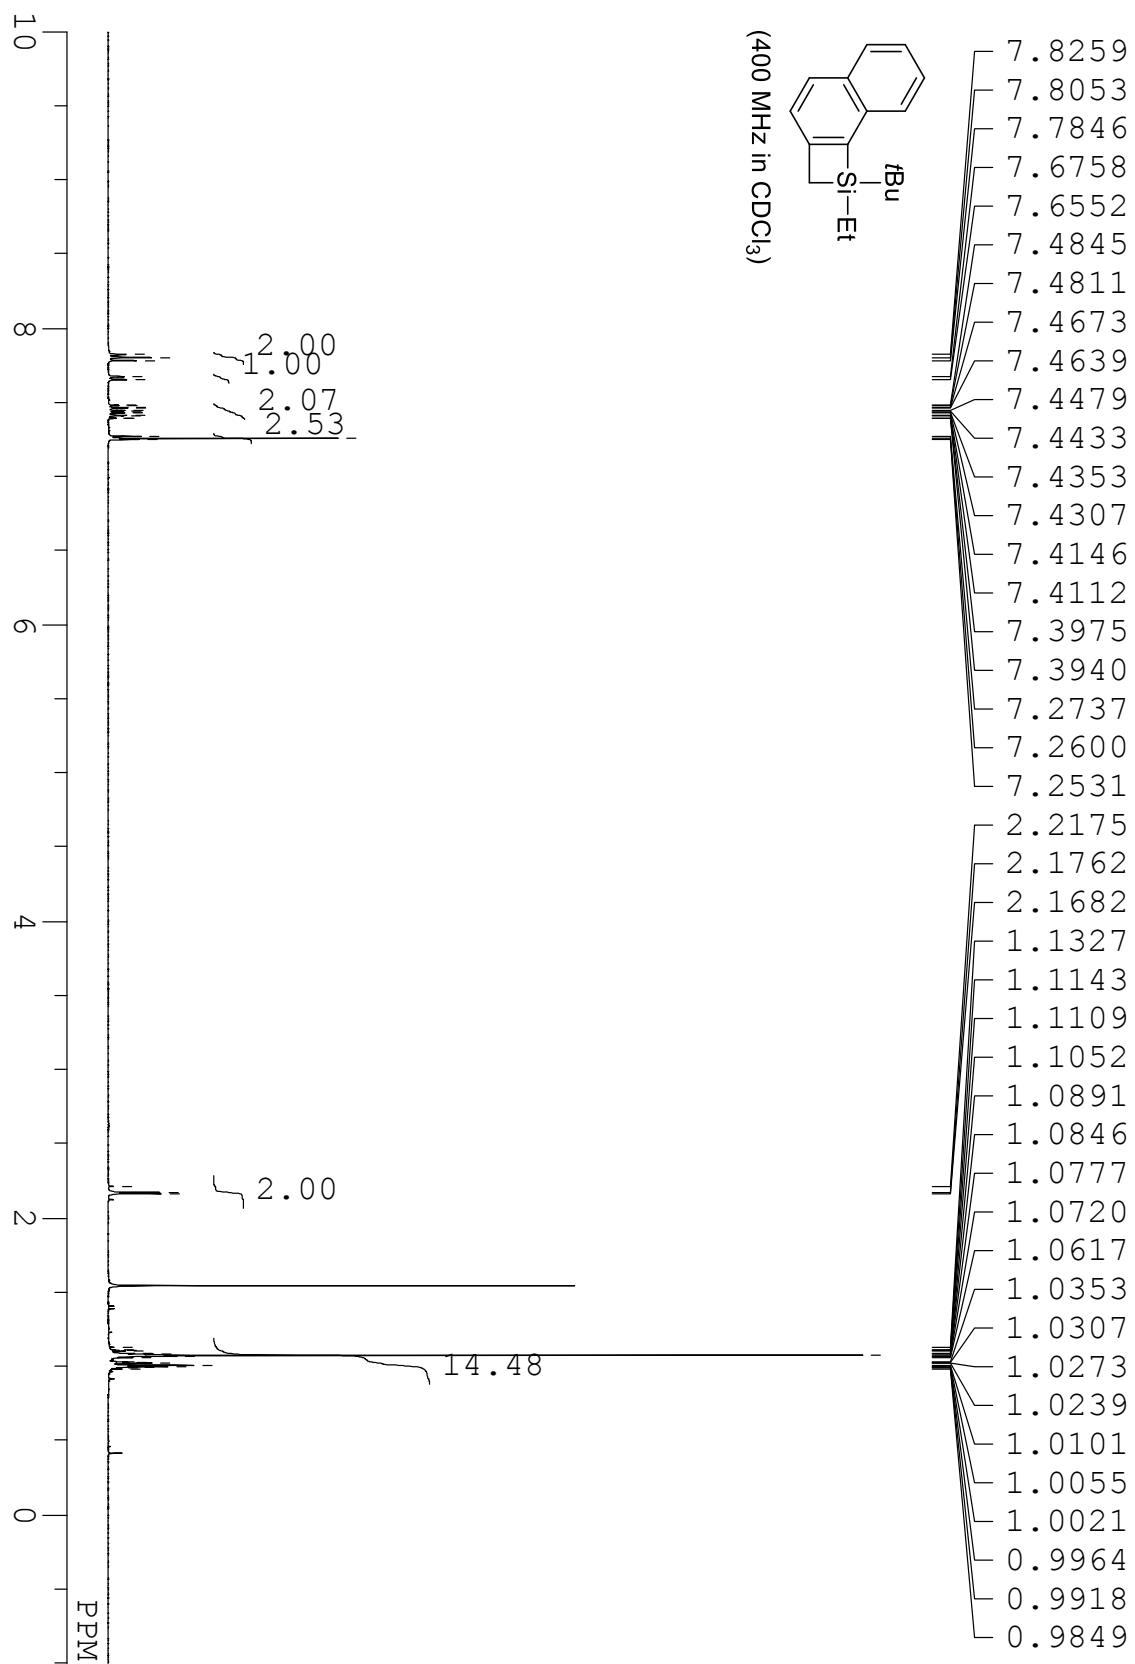

compound **2t** (96% pure)

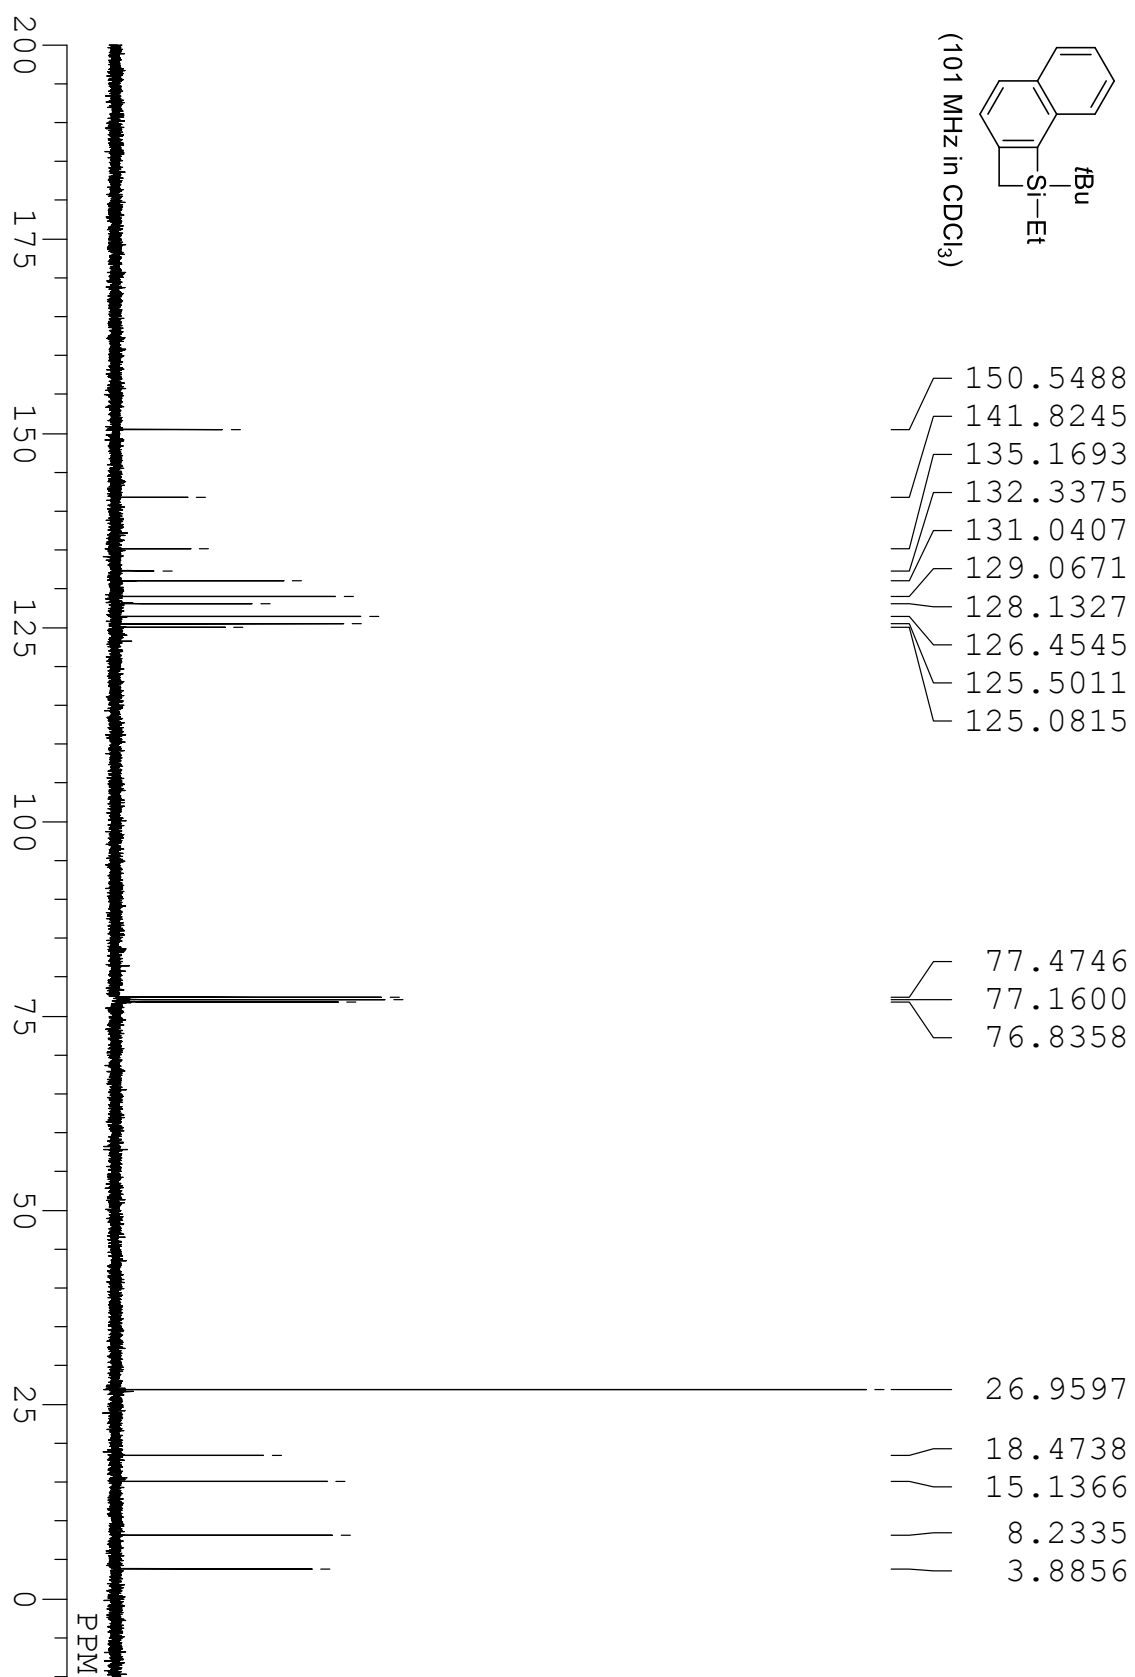

compound **2u**

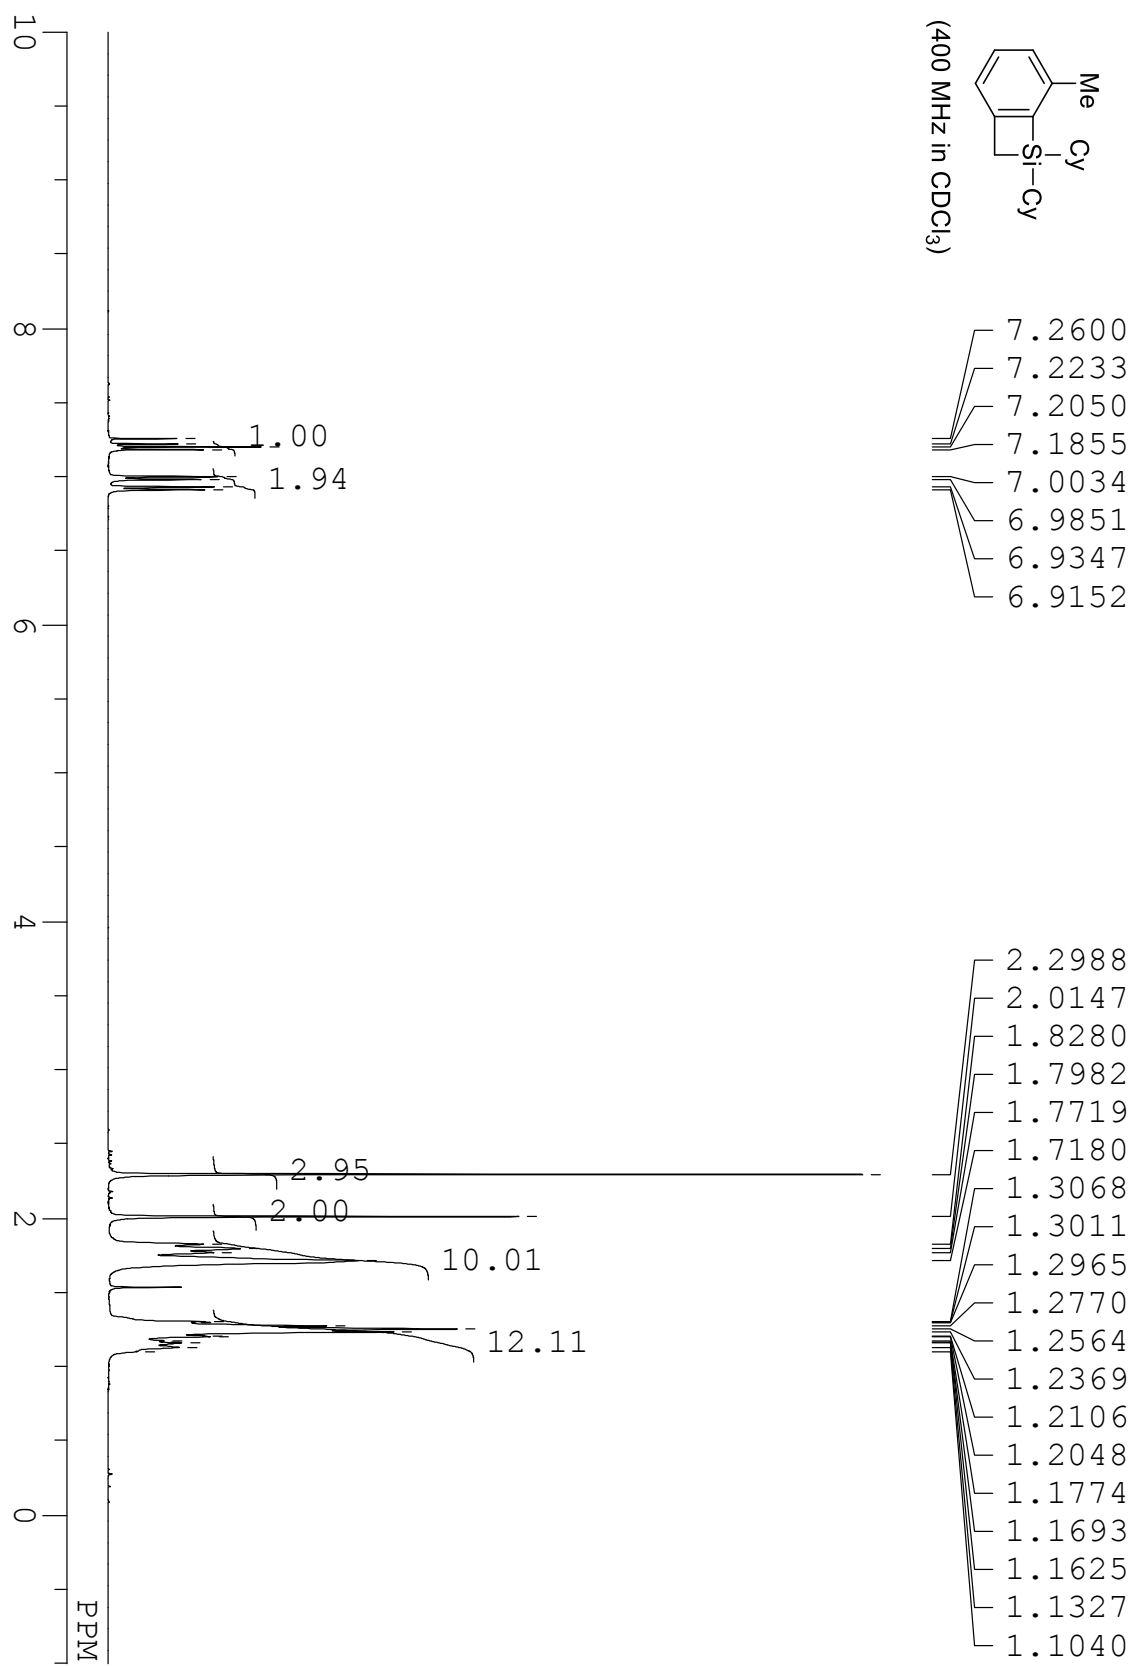

compound 2u

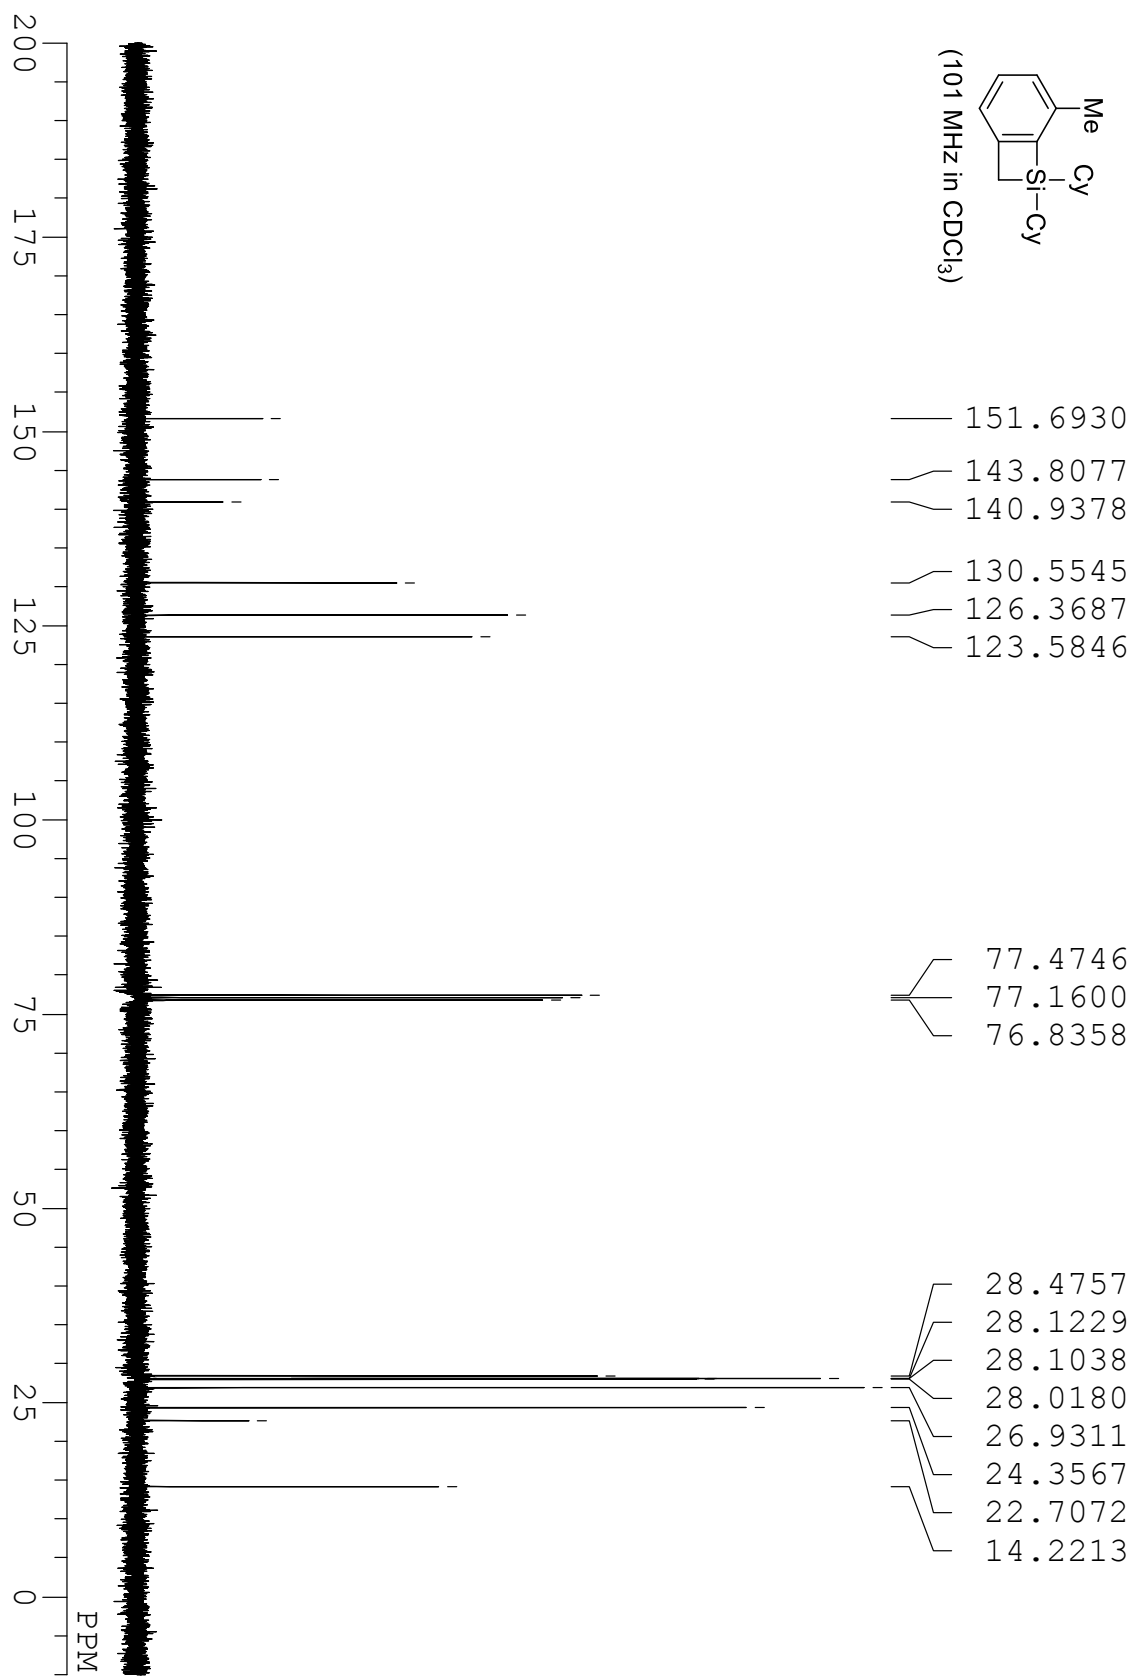

compound 2v

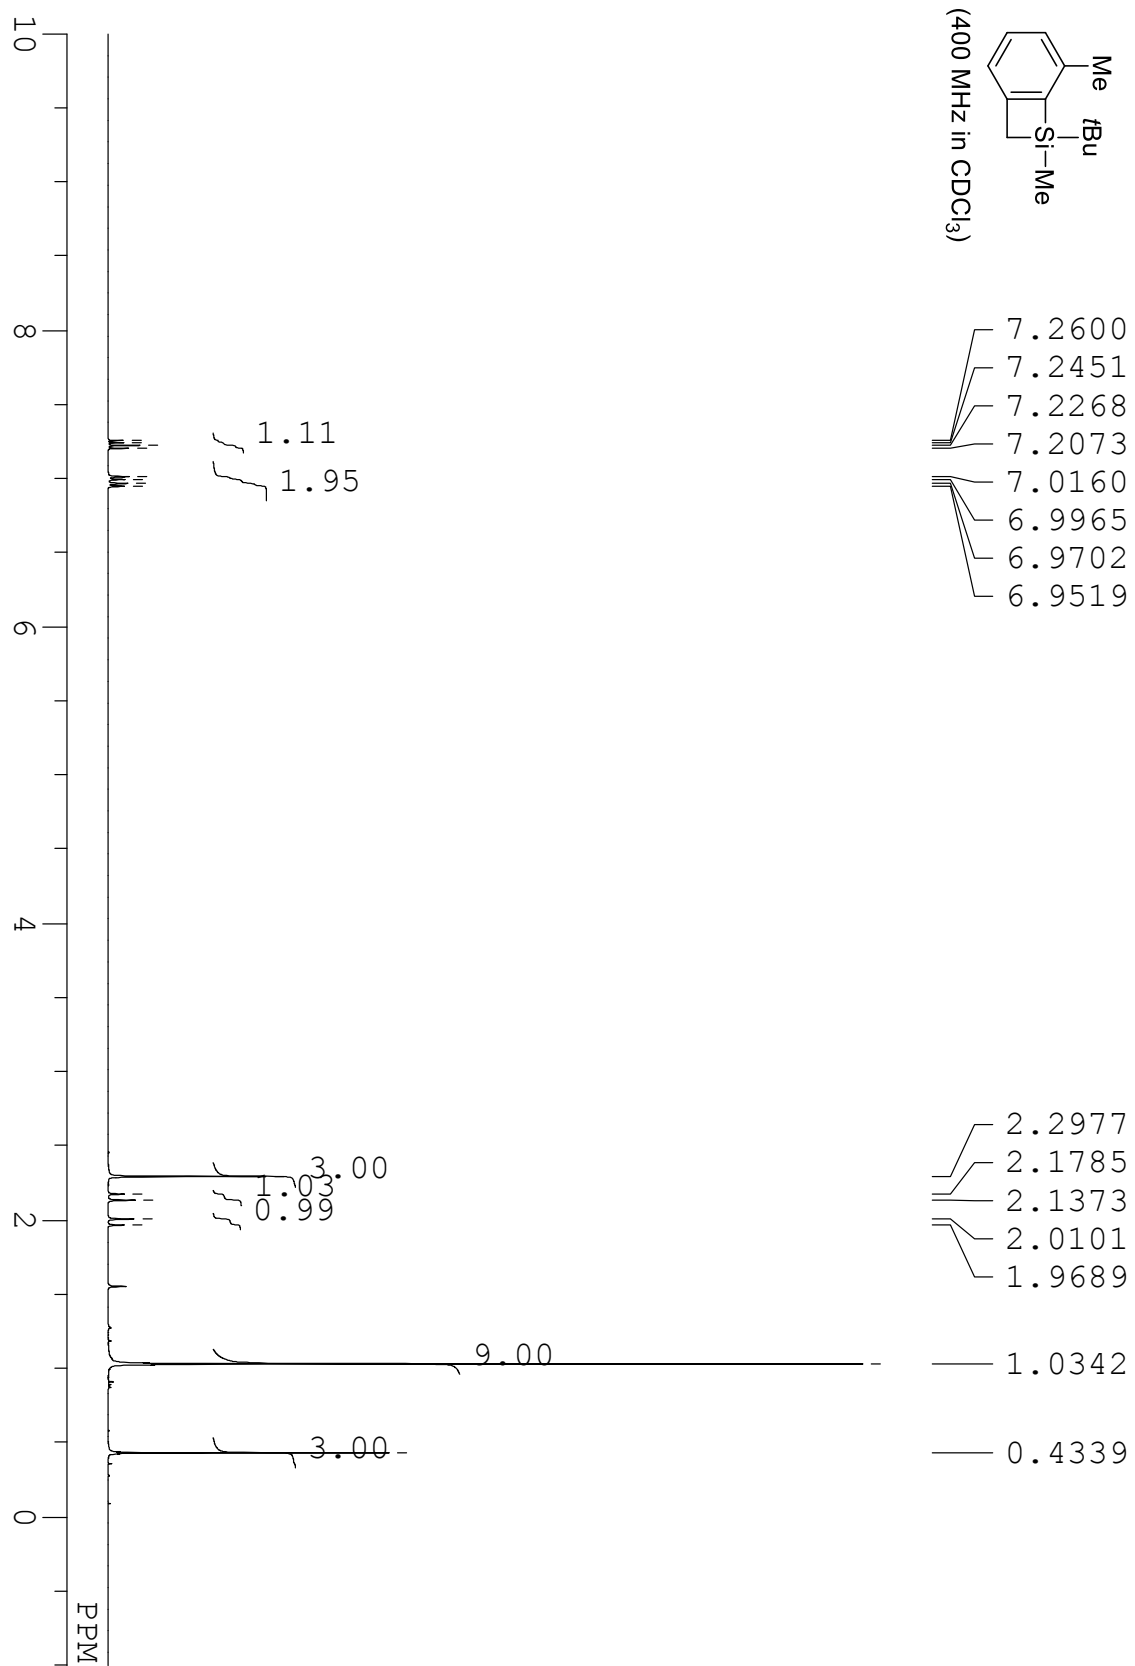

compound 2v

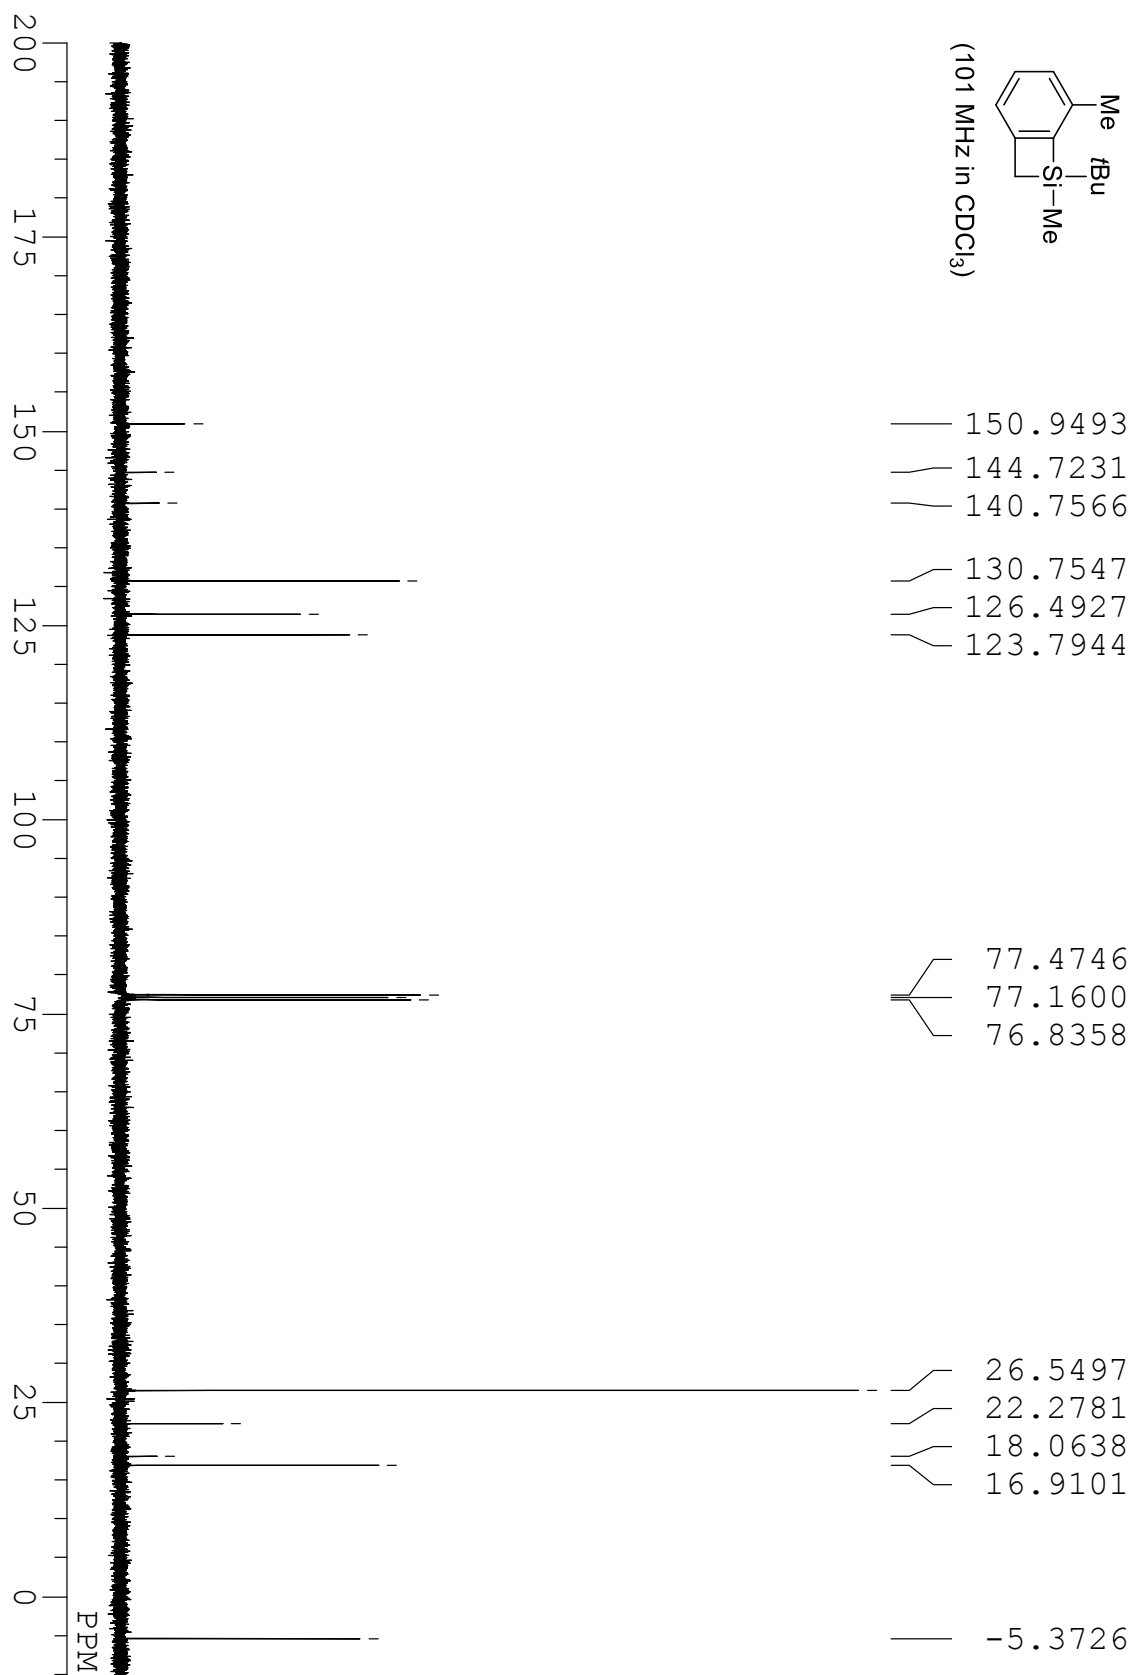



compound **4aa**

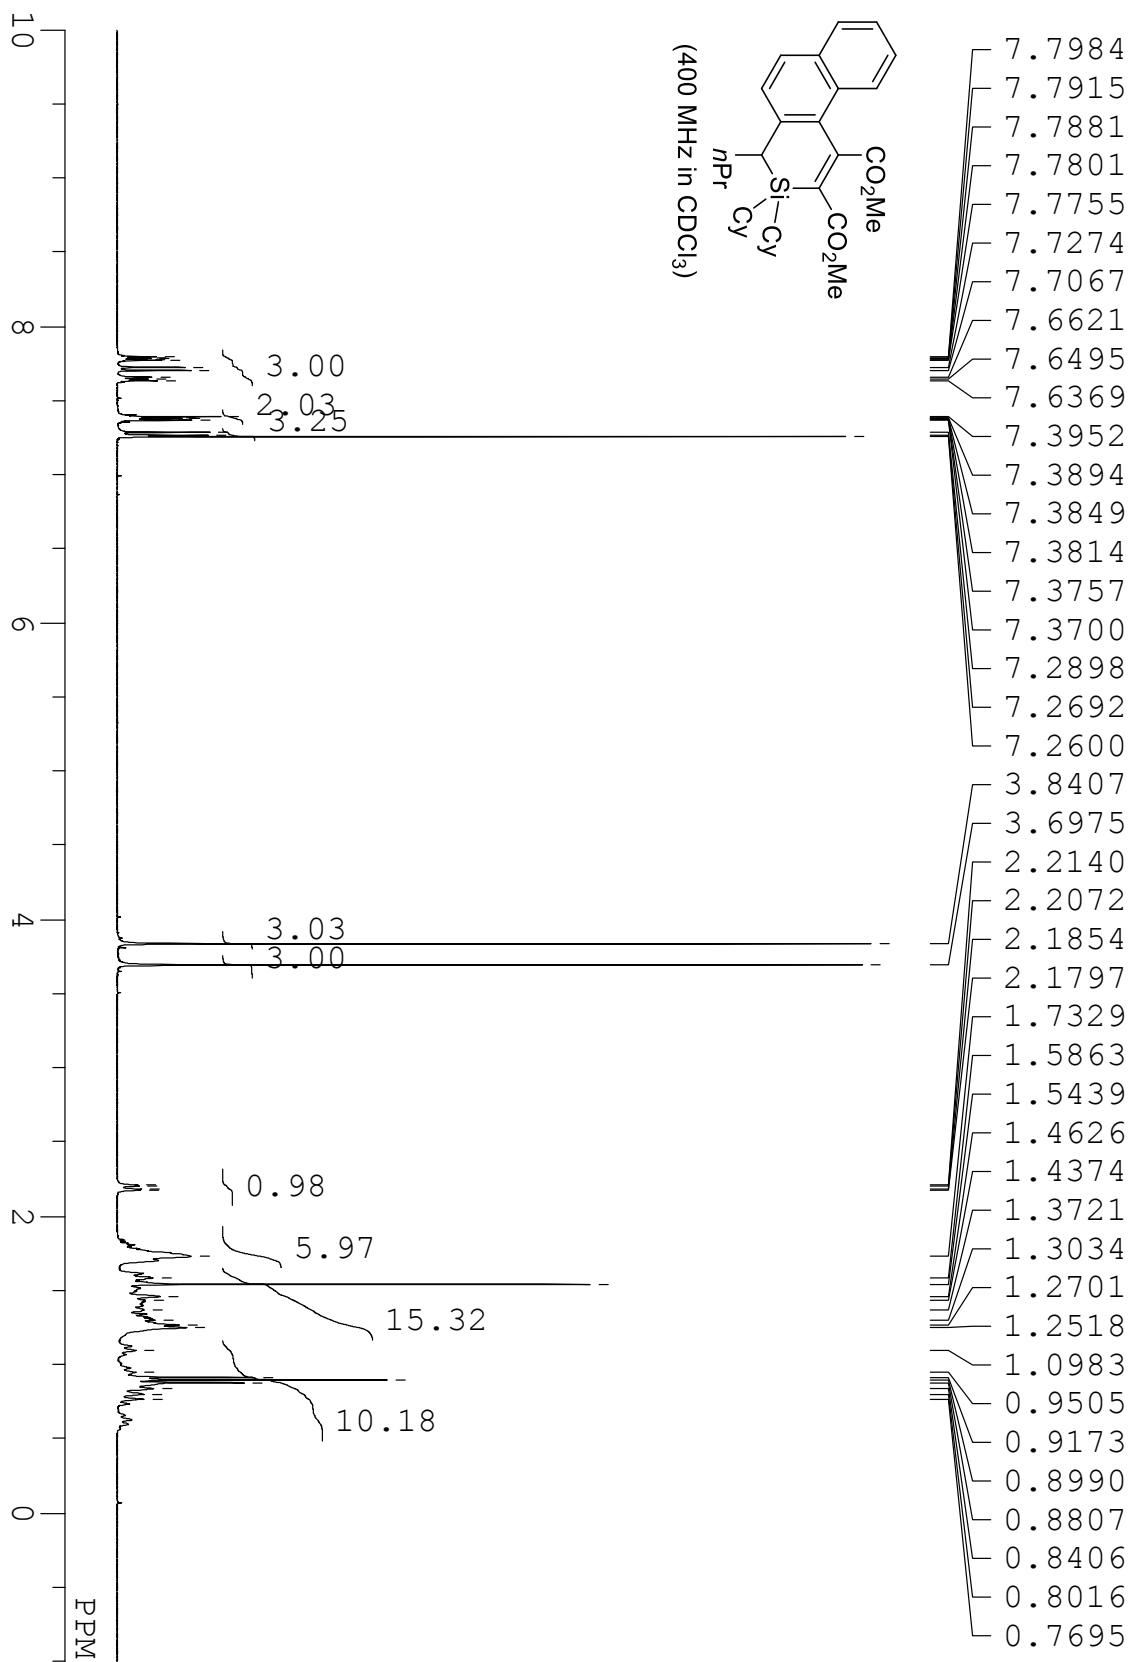

compound 4aa

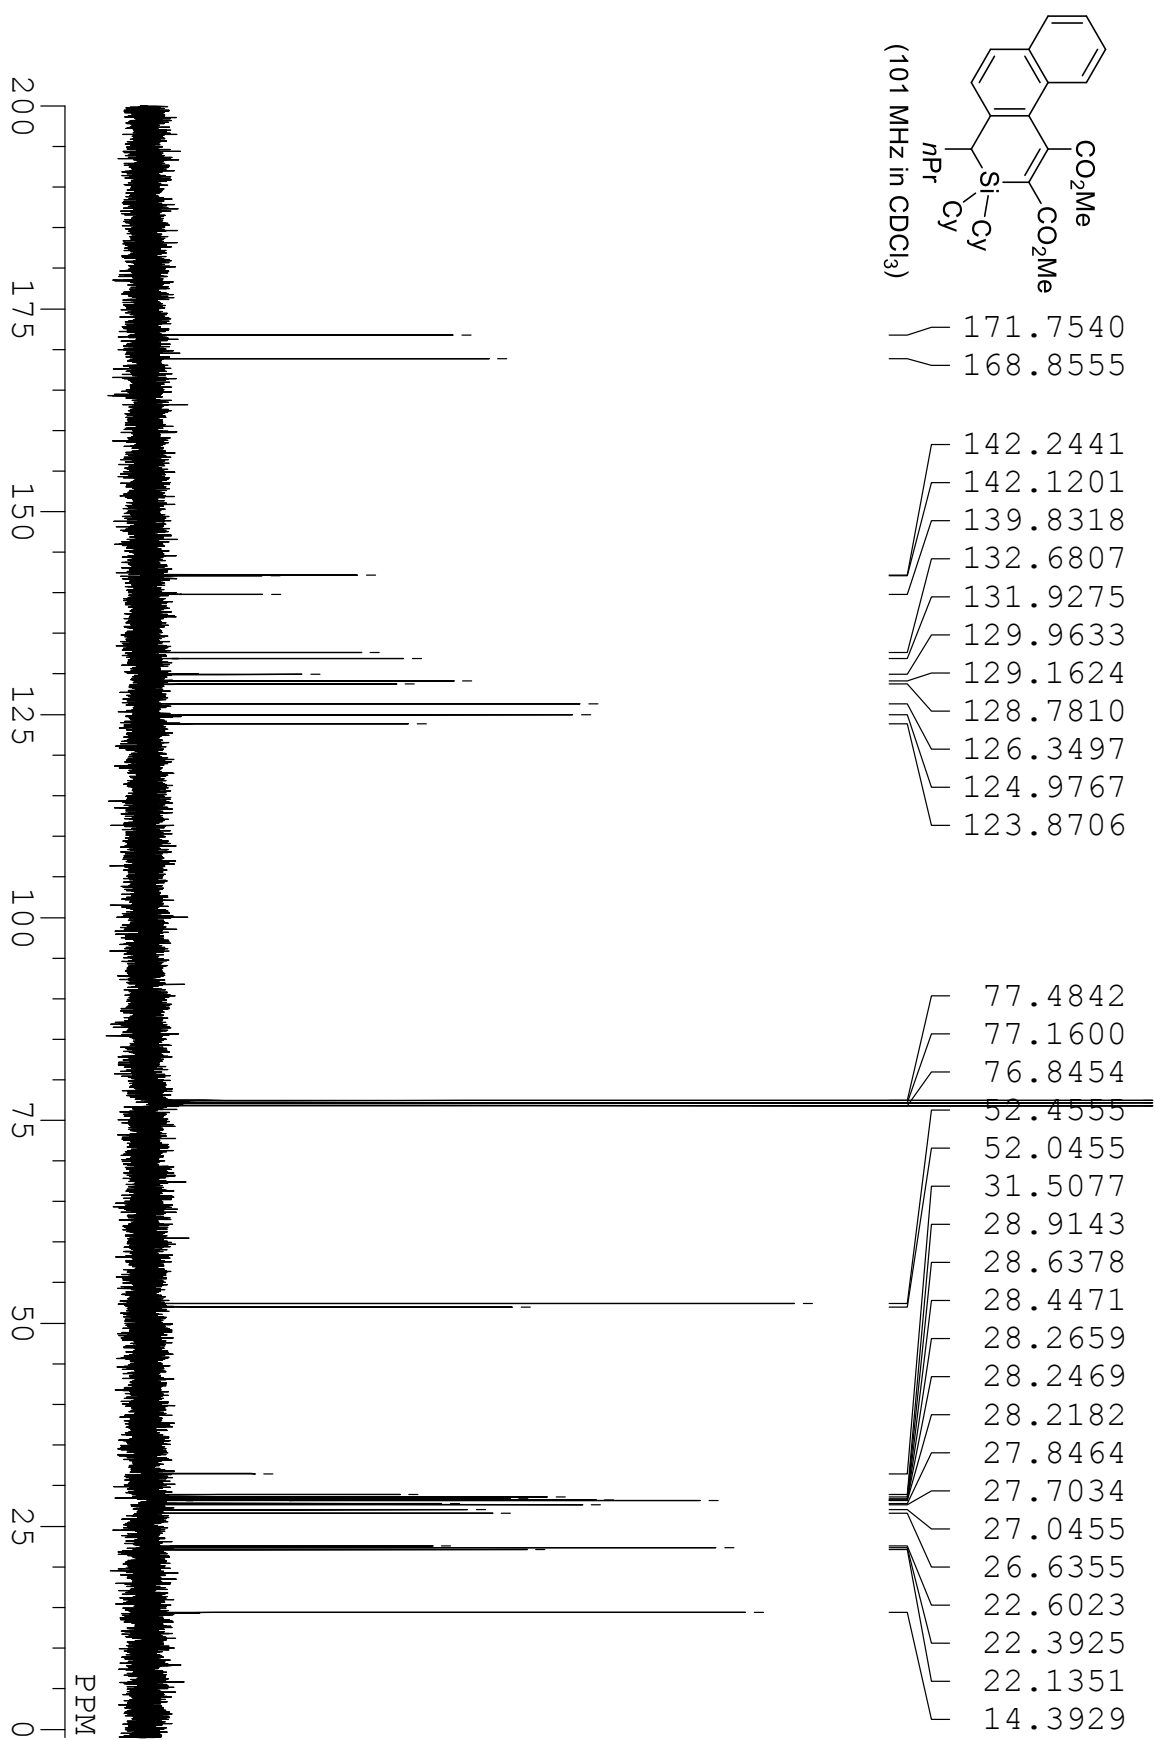

compound **4ia**

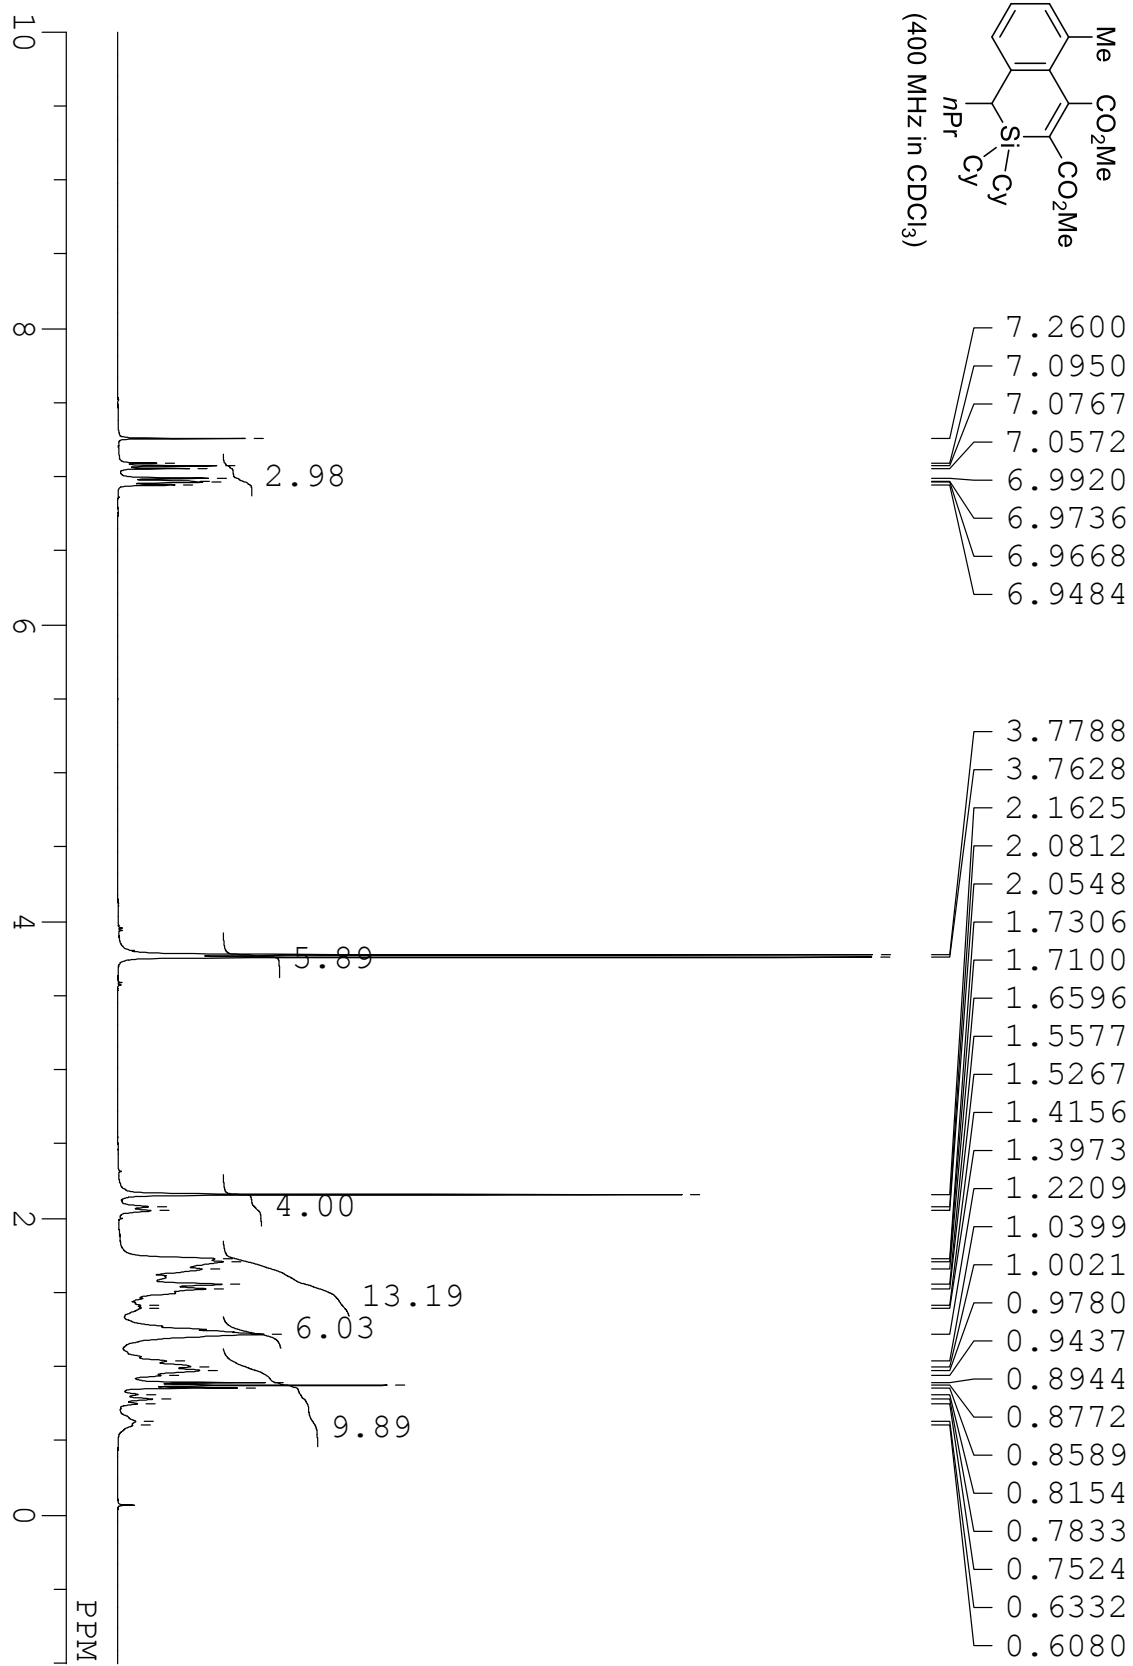

compound 4ia

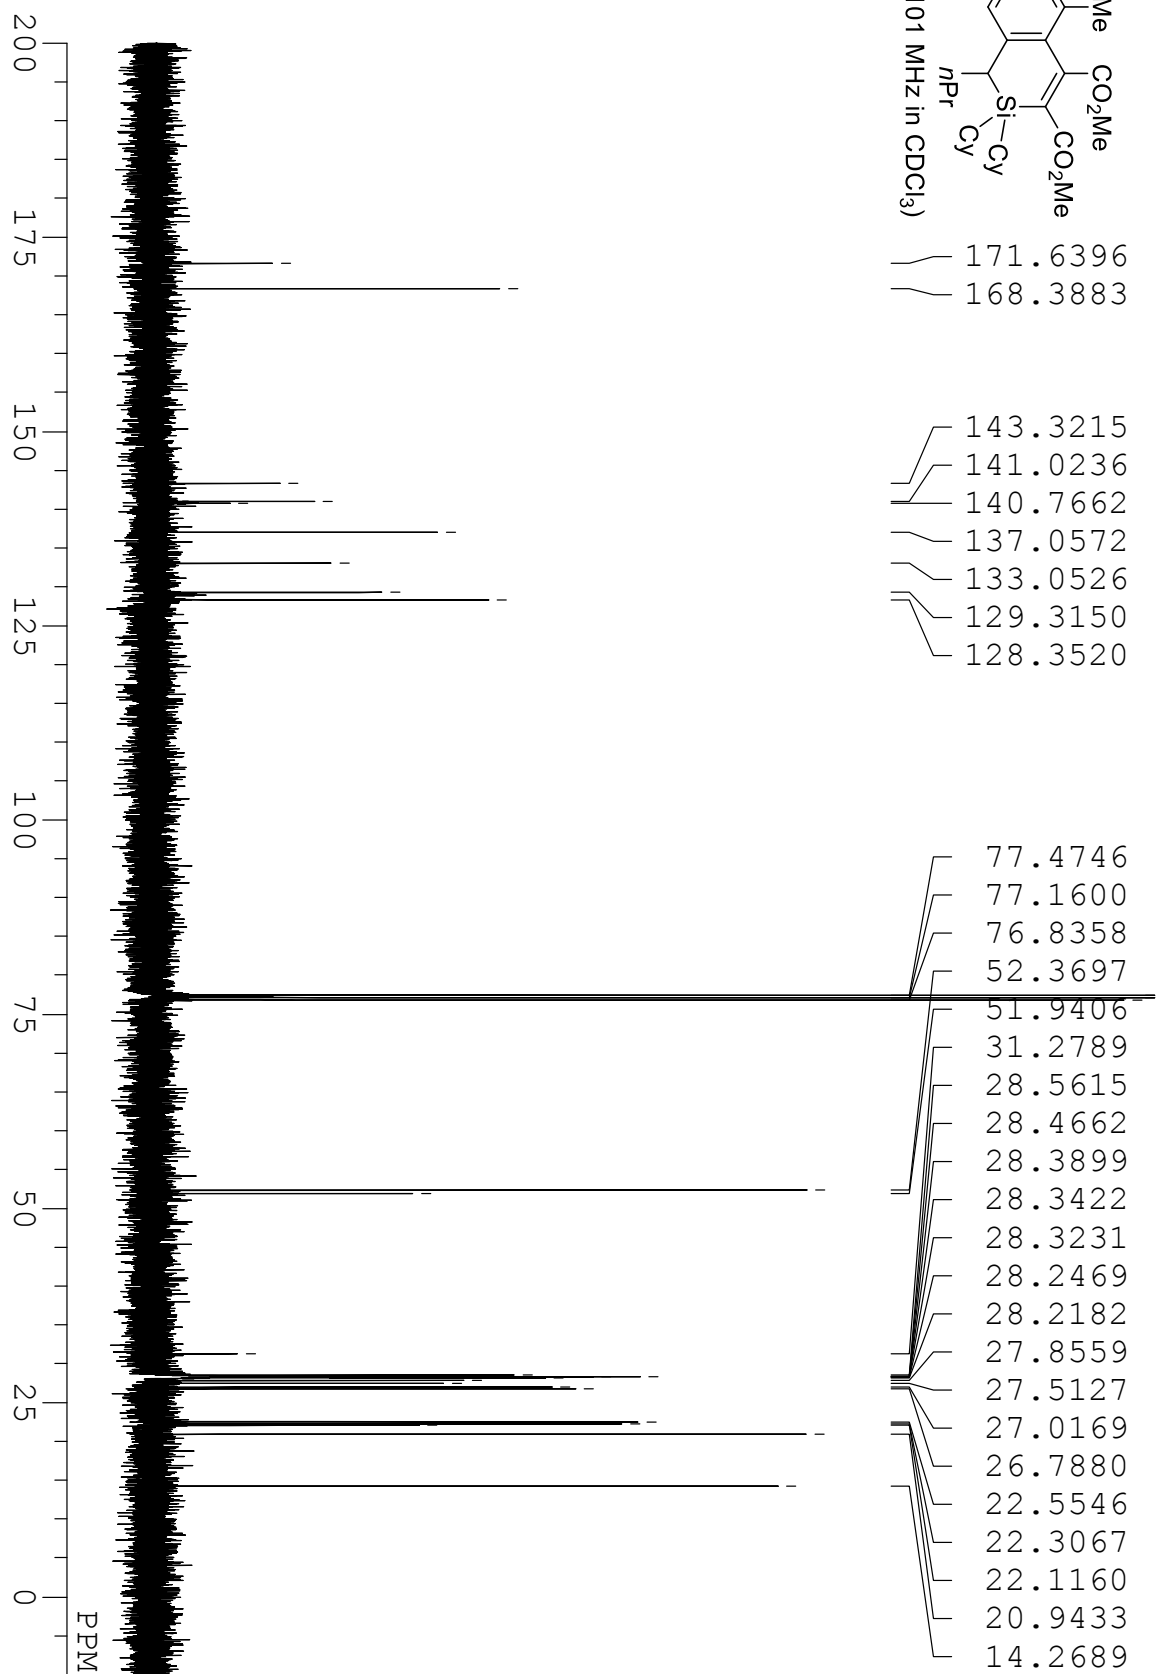

compound 4qa

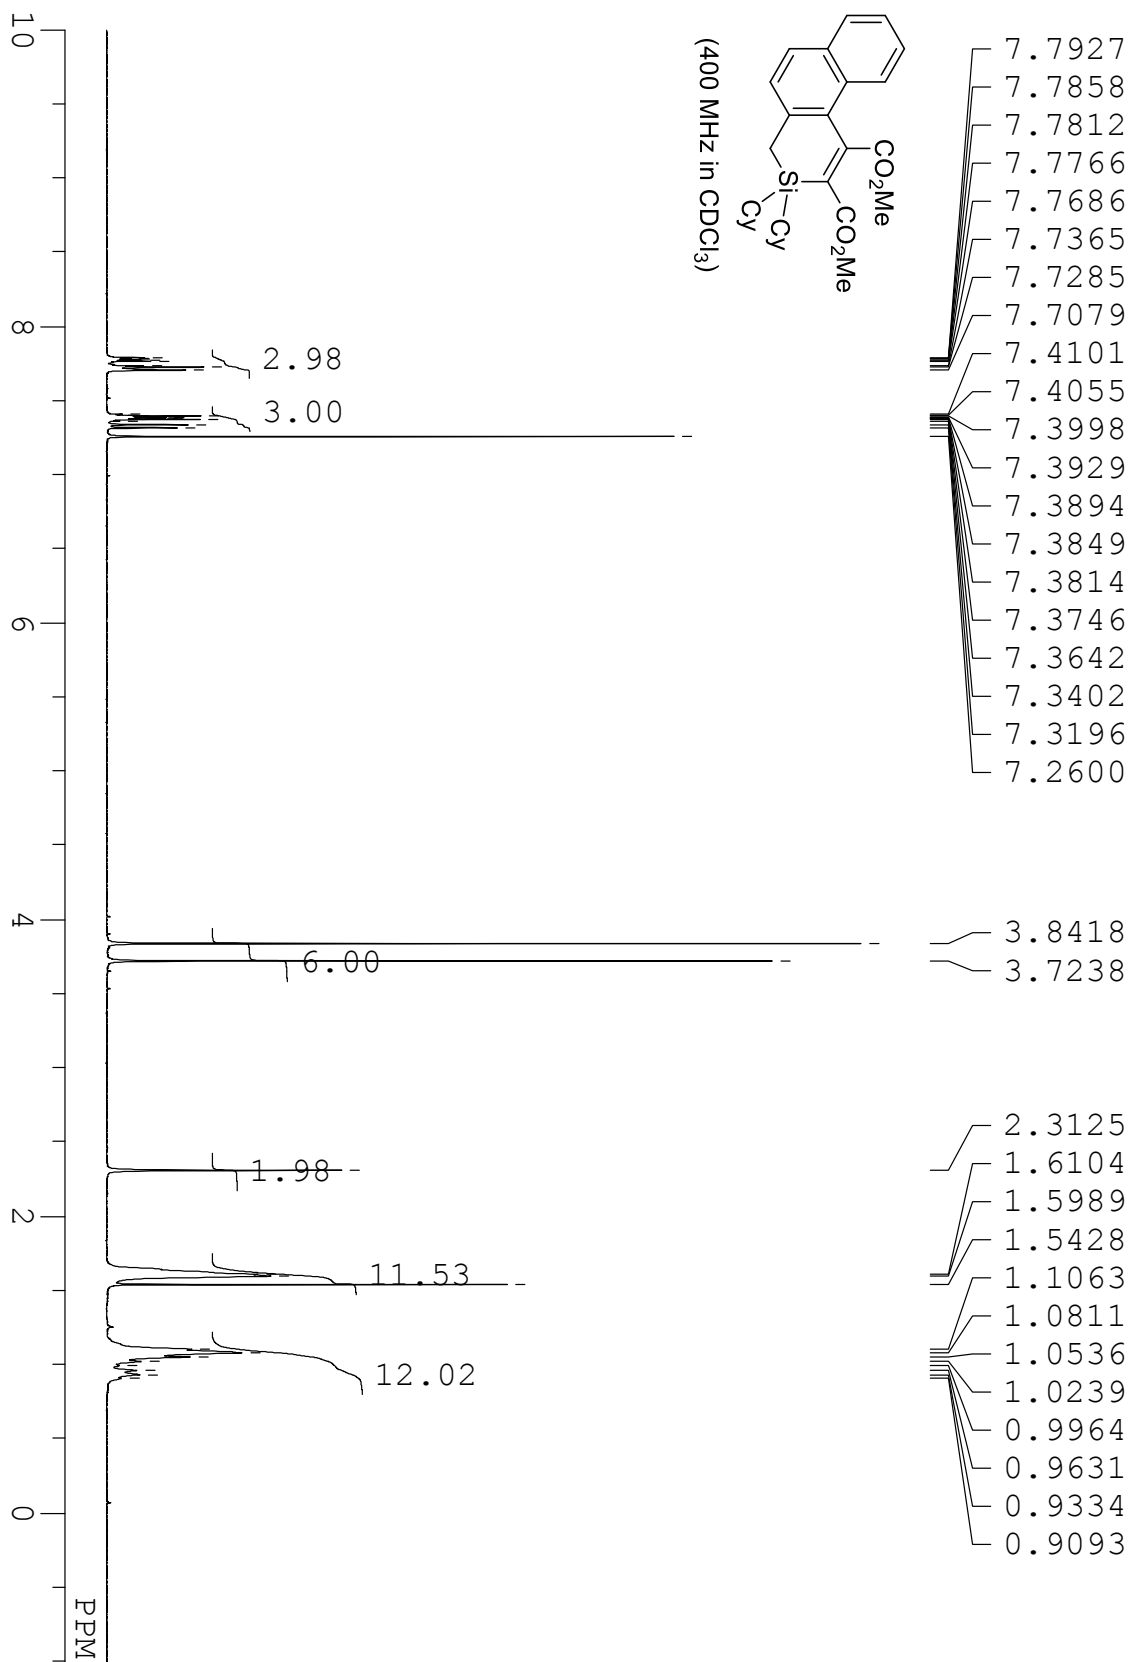

compound 4qa

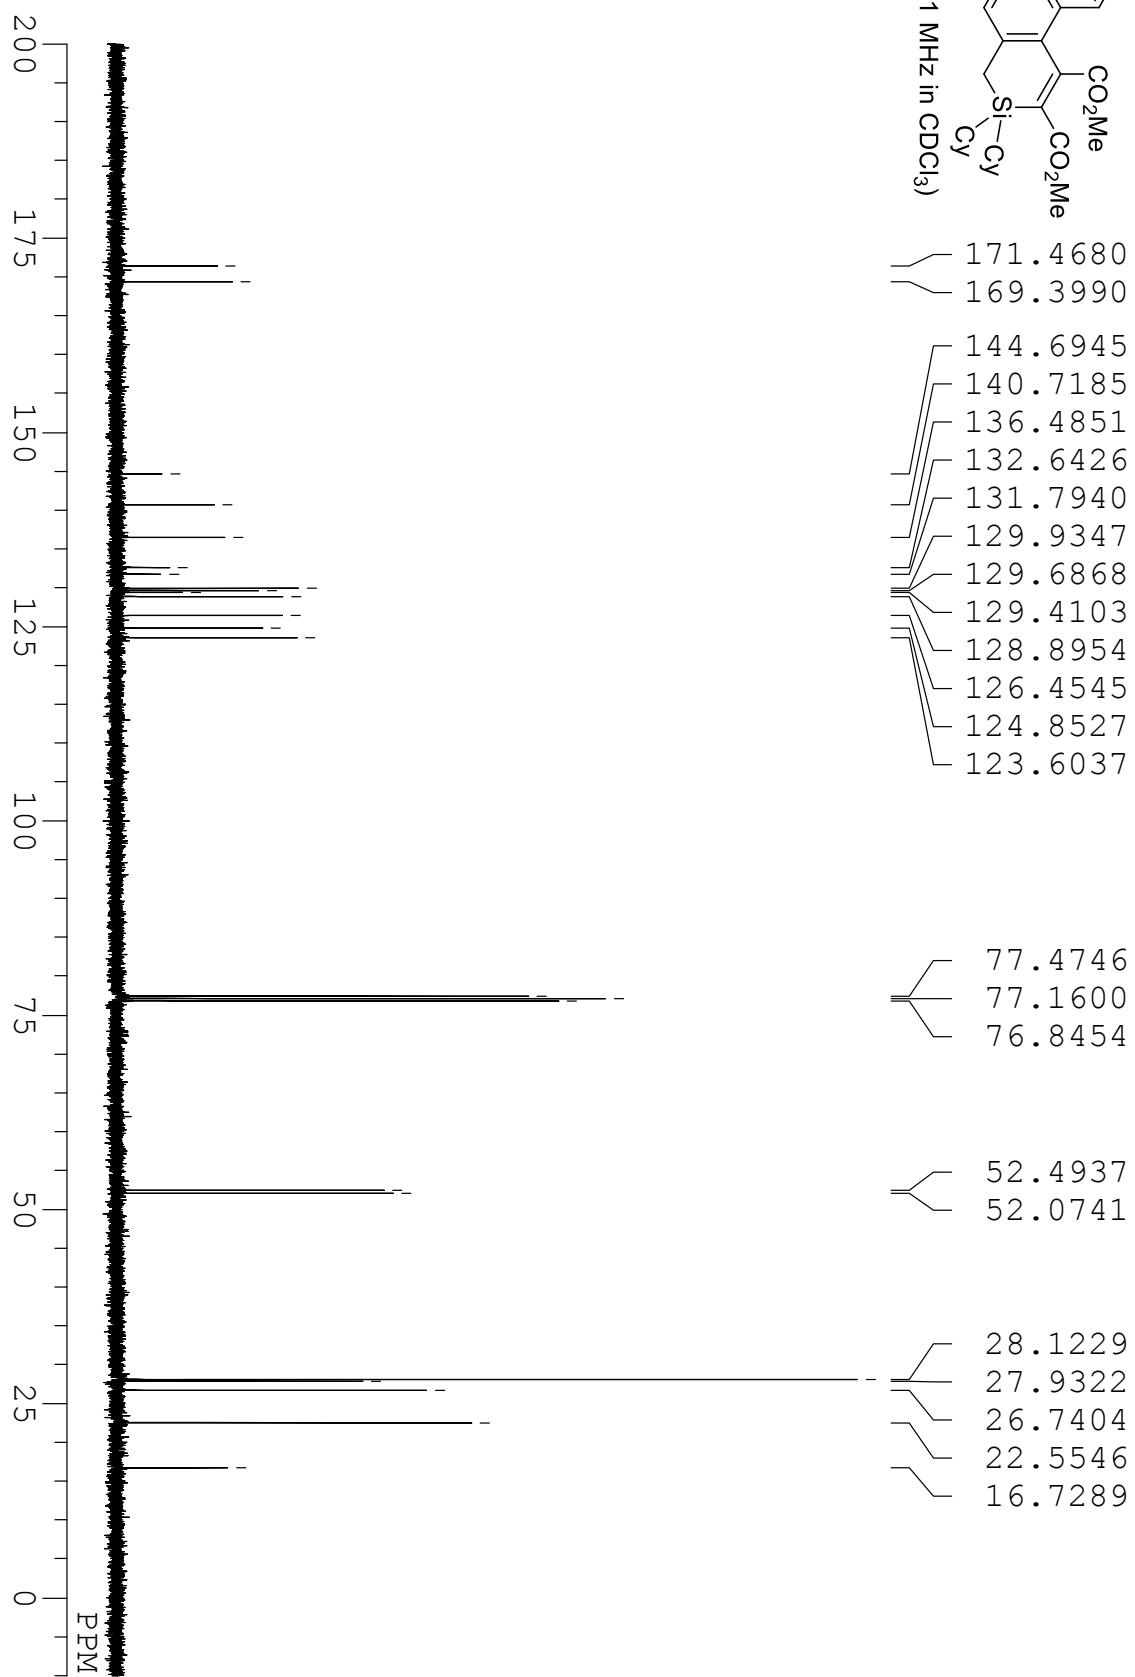

compound **4qb**

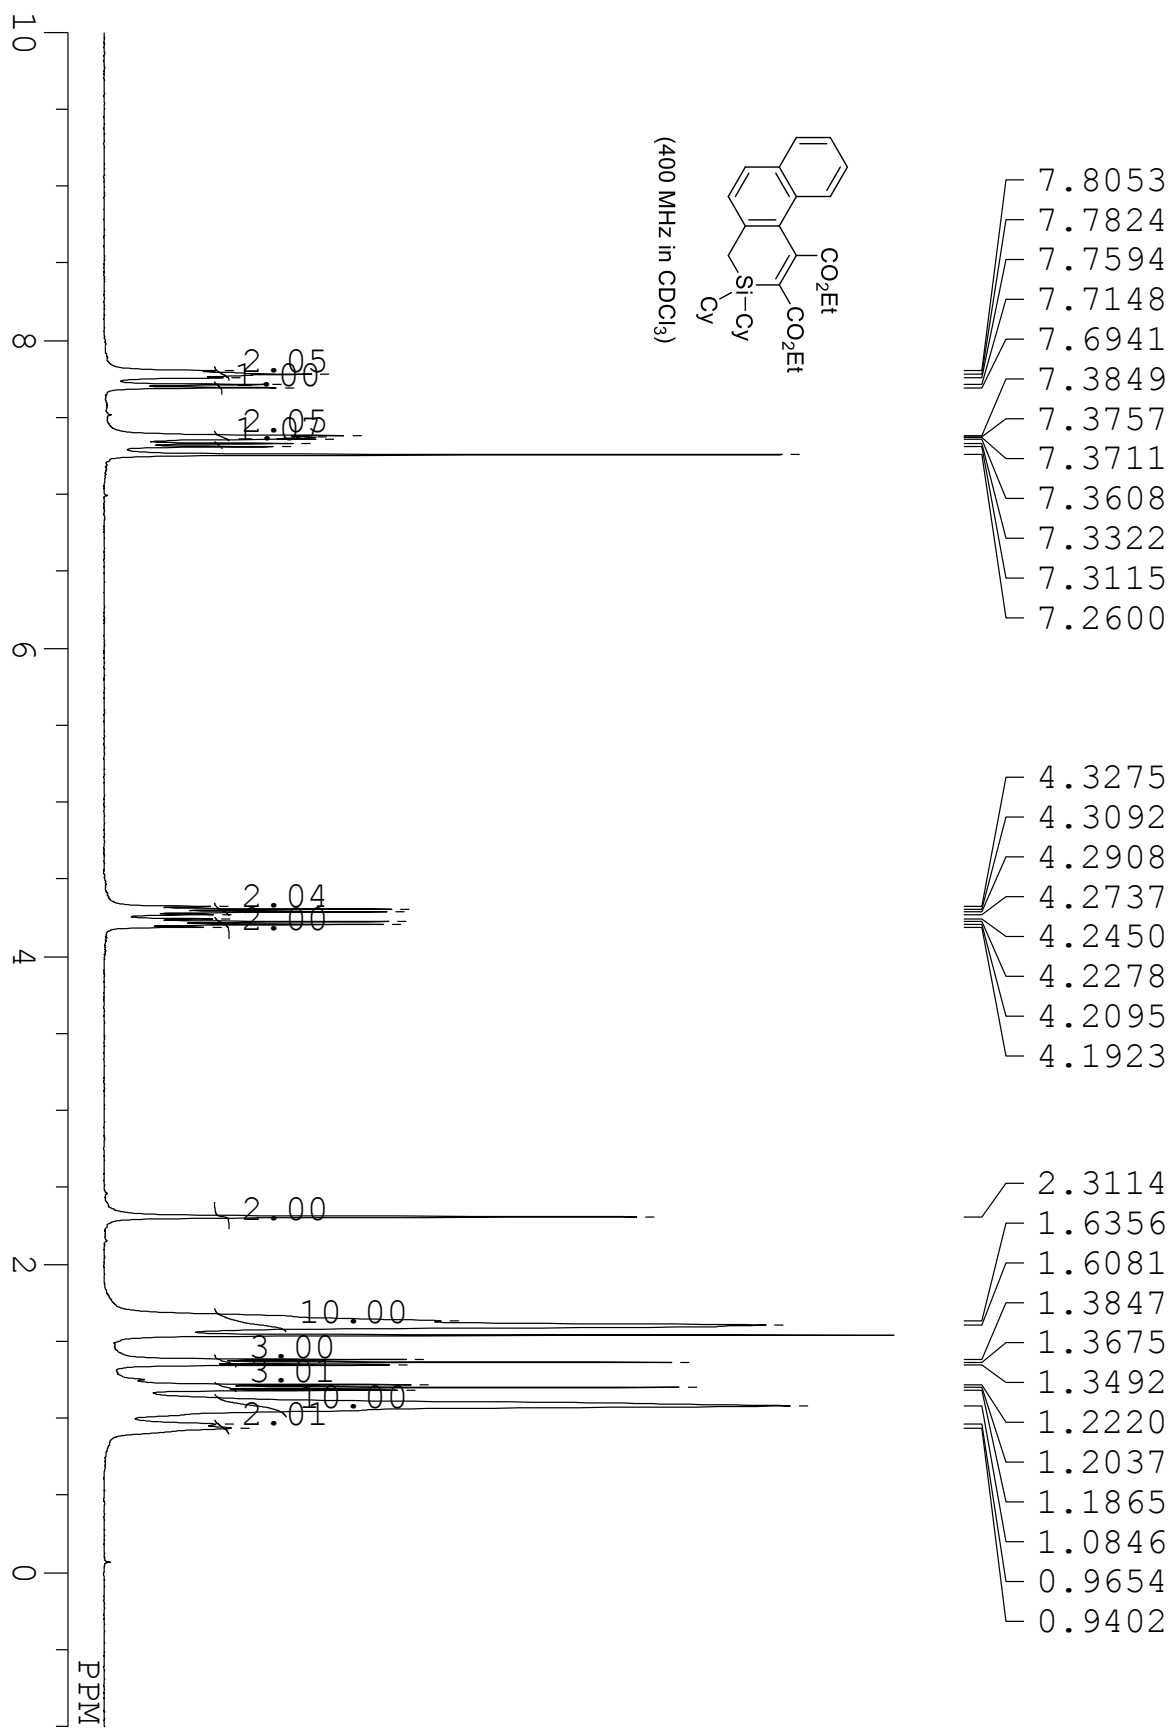

compound 4qb

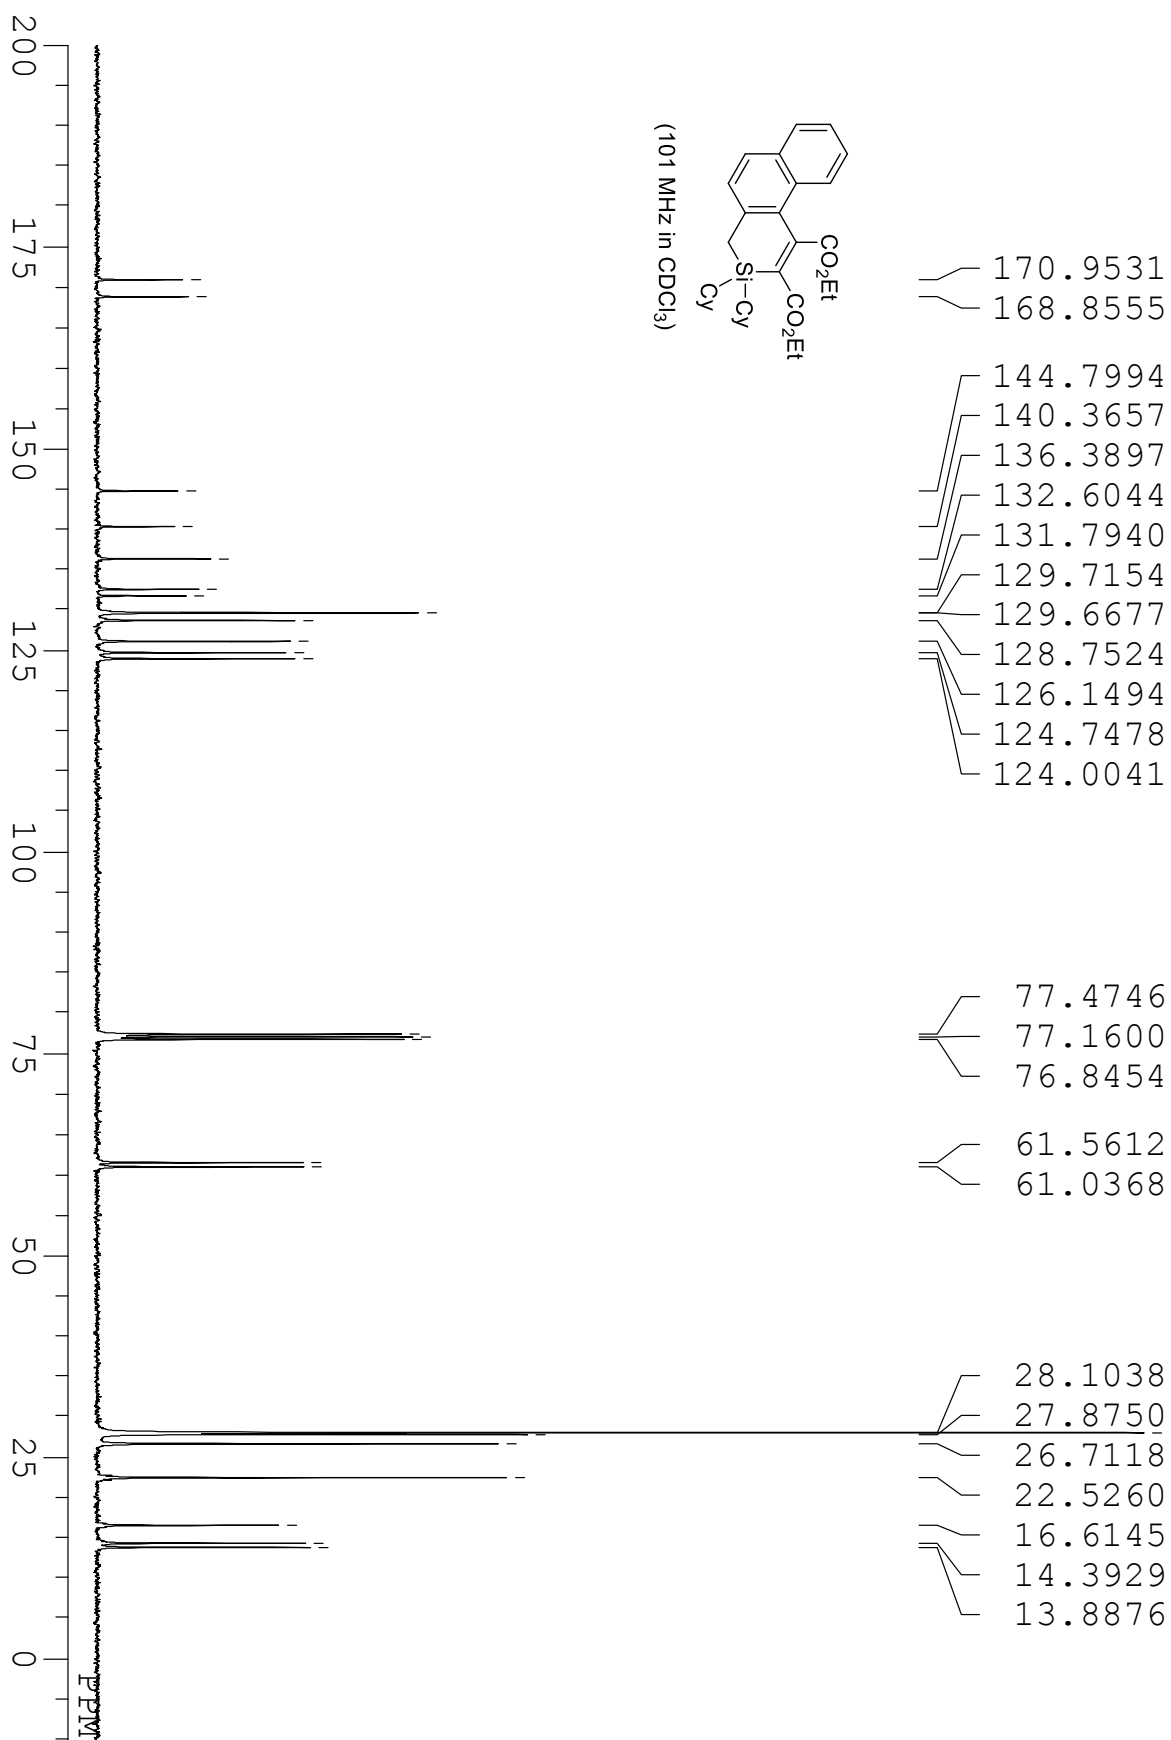



compound **4qc** (regioselectivity: 82/18)

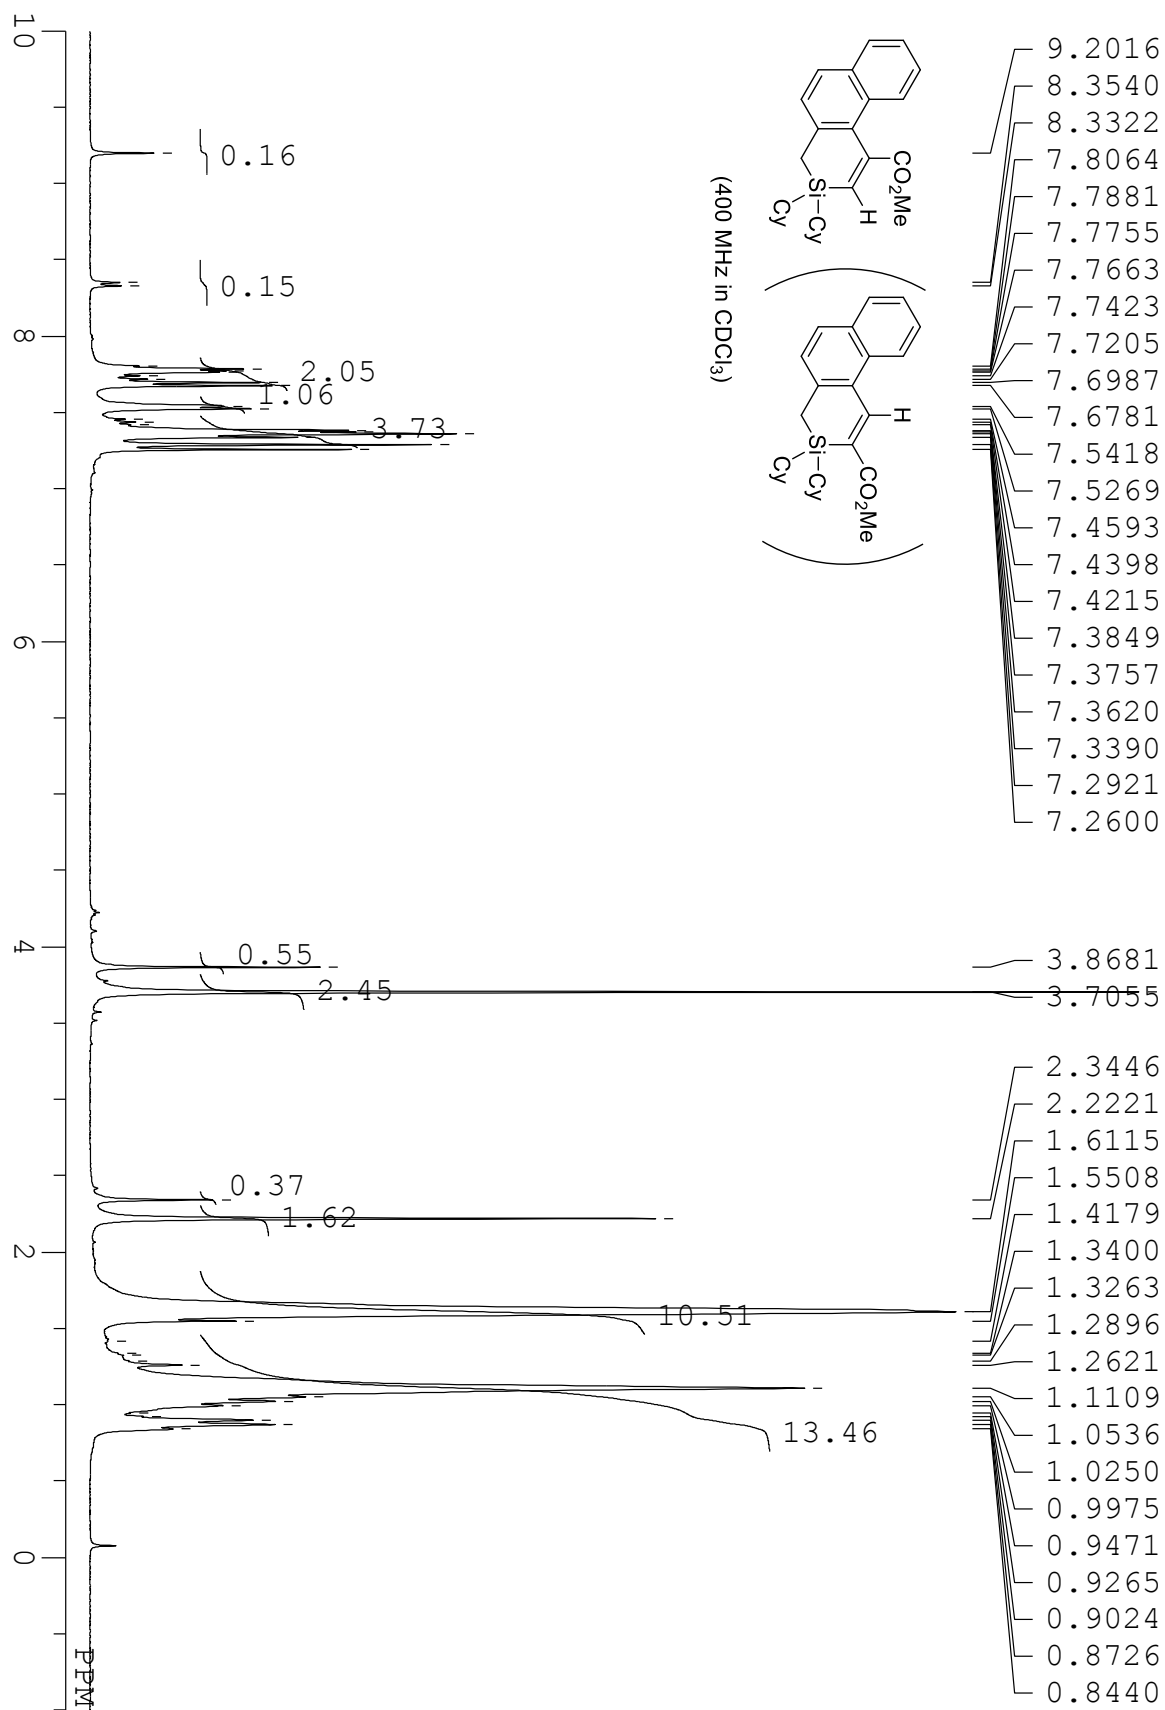

compound **4qc** (regioselectivity: 82/18)

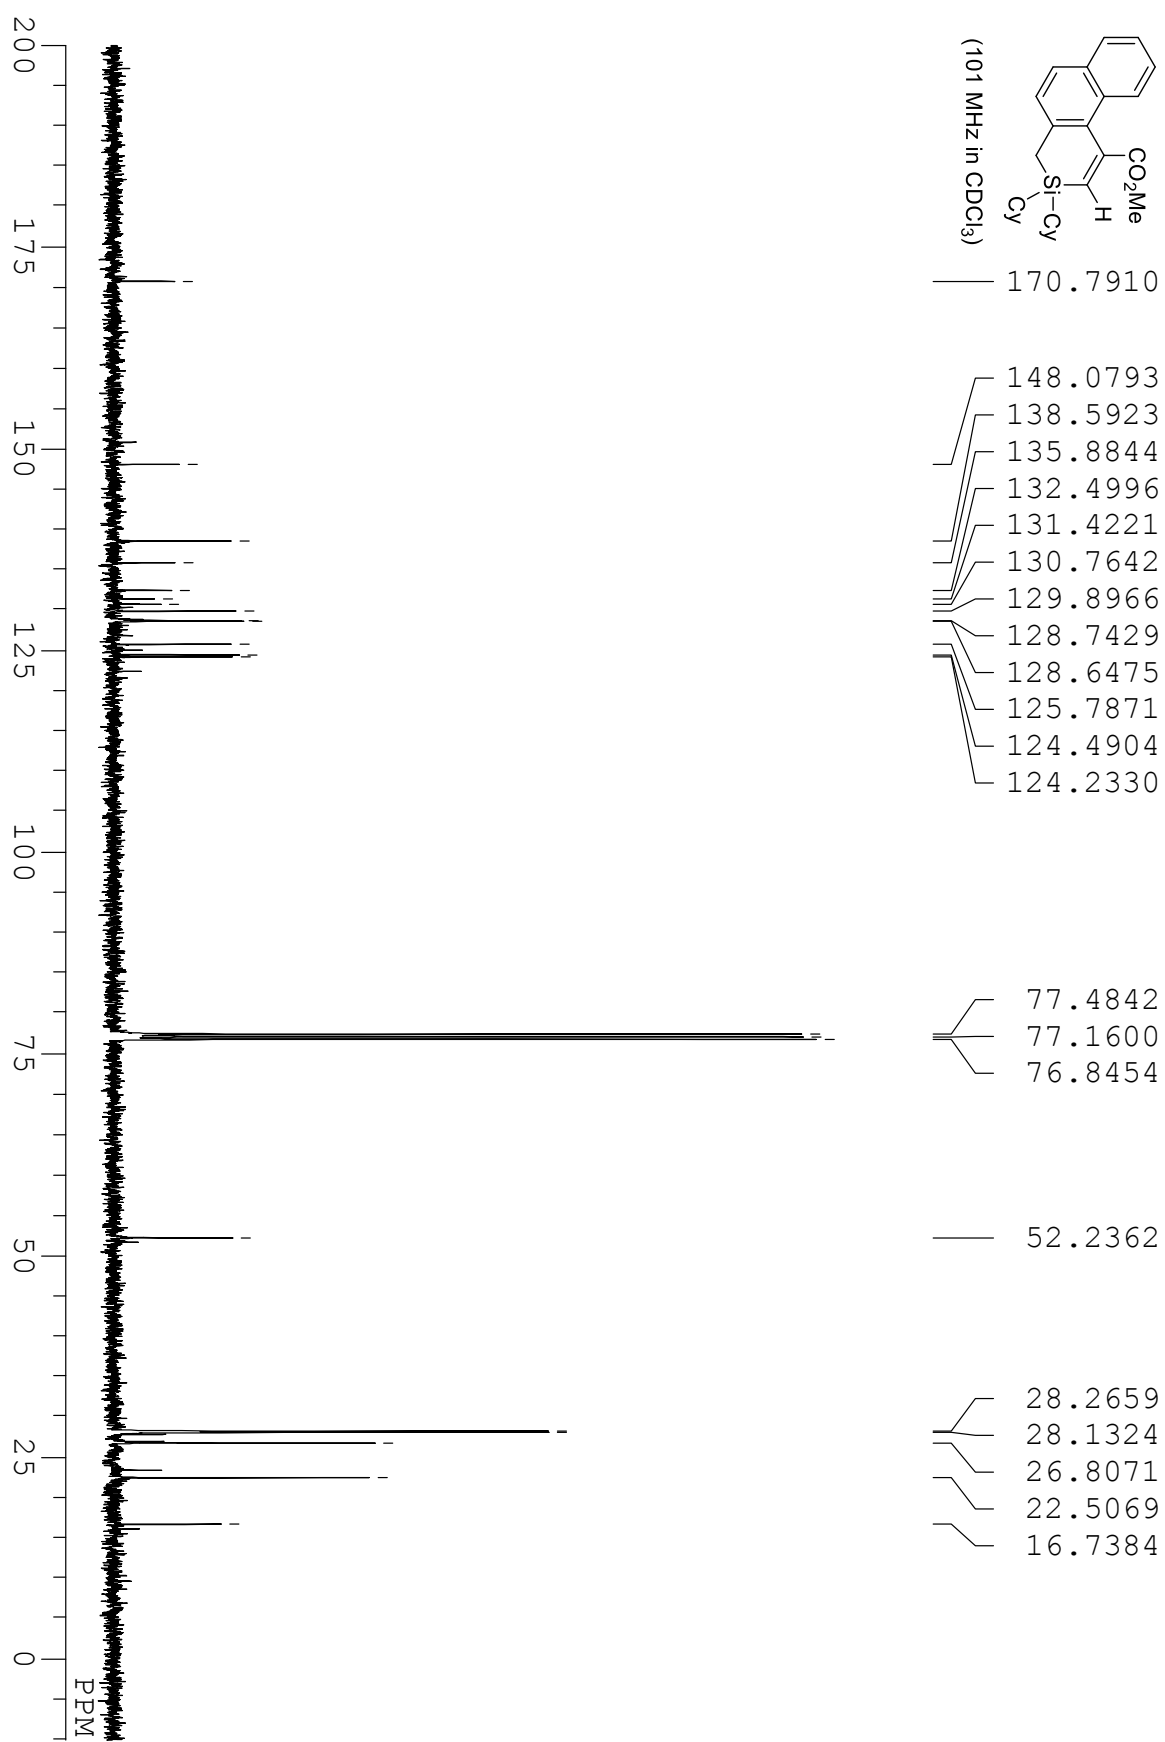

compound **6aa** (*cis/trans* = 89/11)

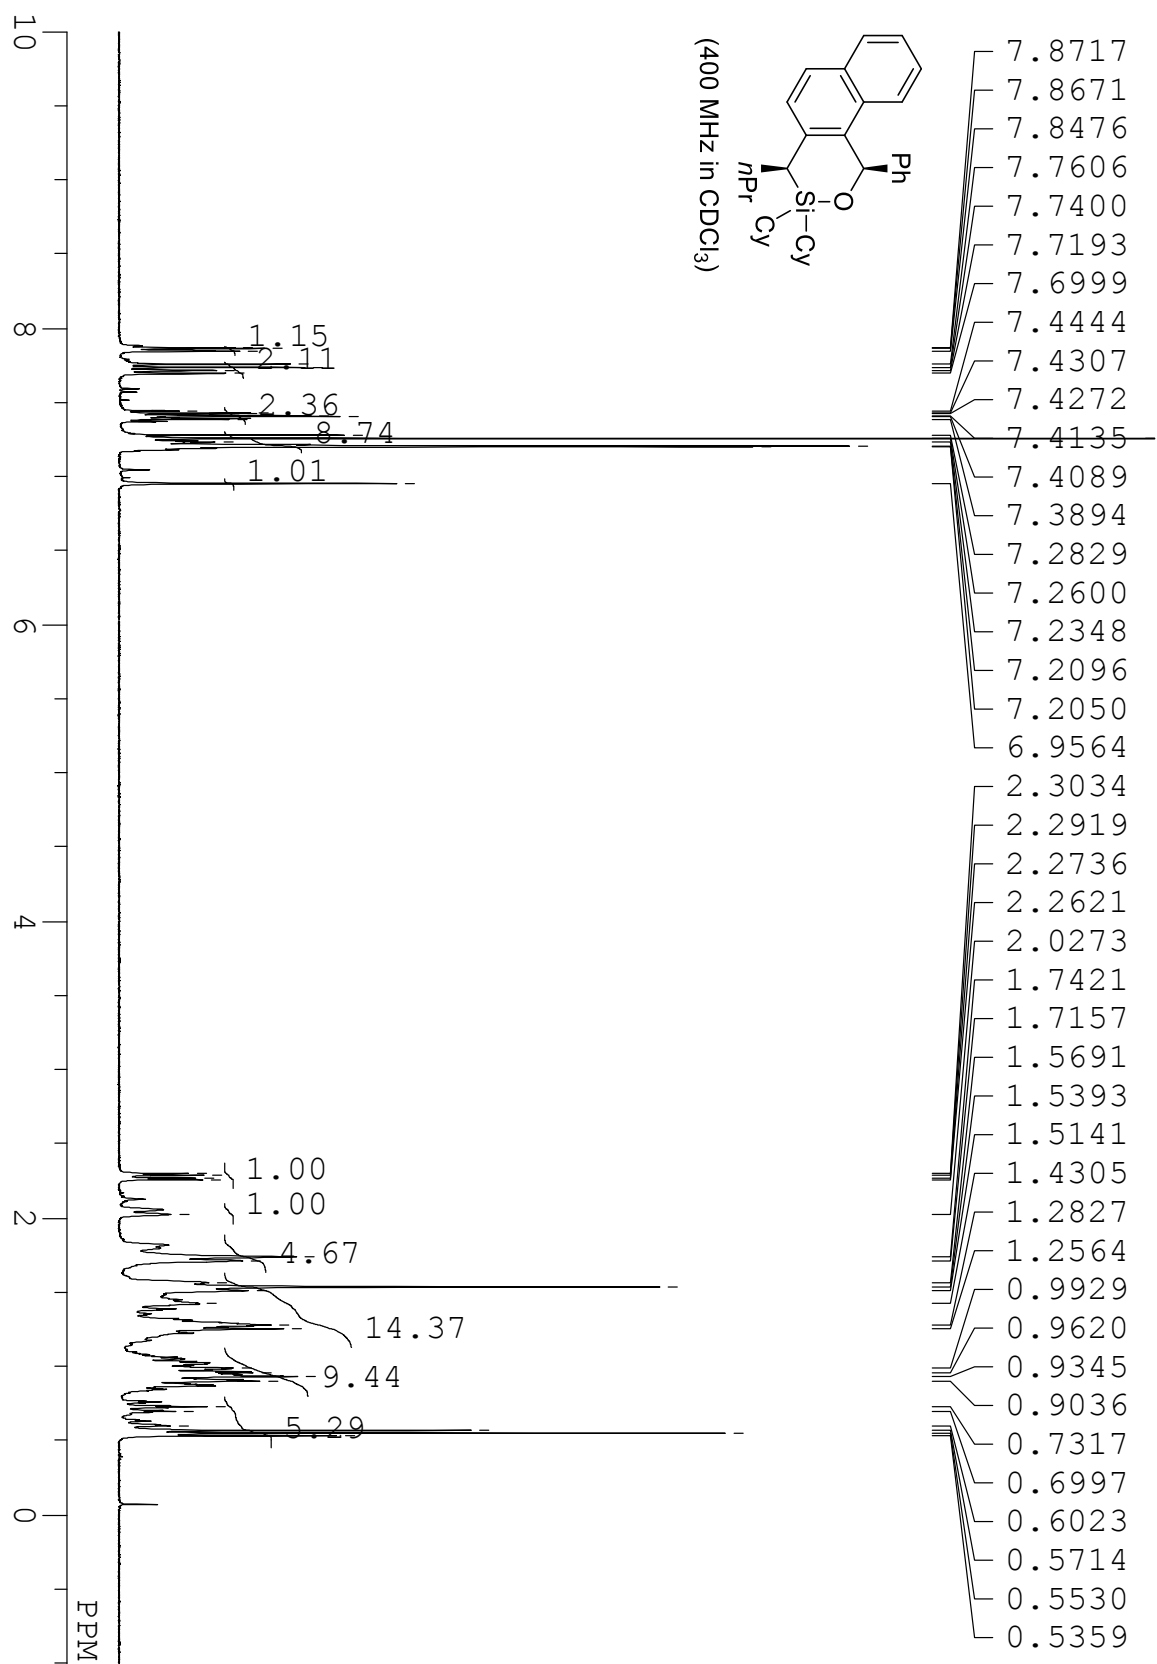

compound **6aa** (*cis/trans* = 89/11)

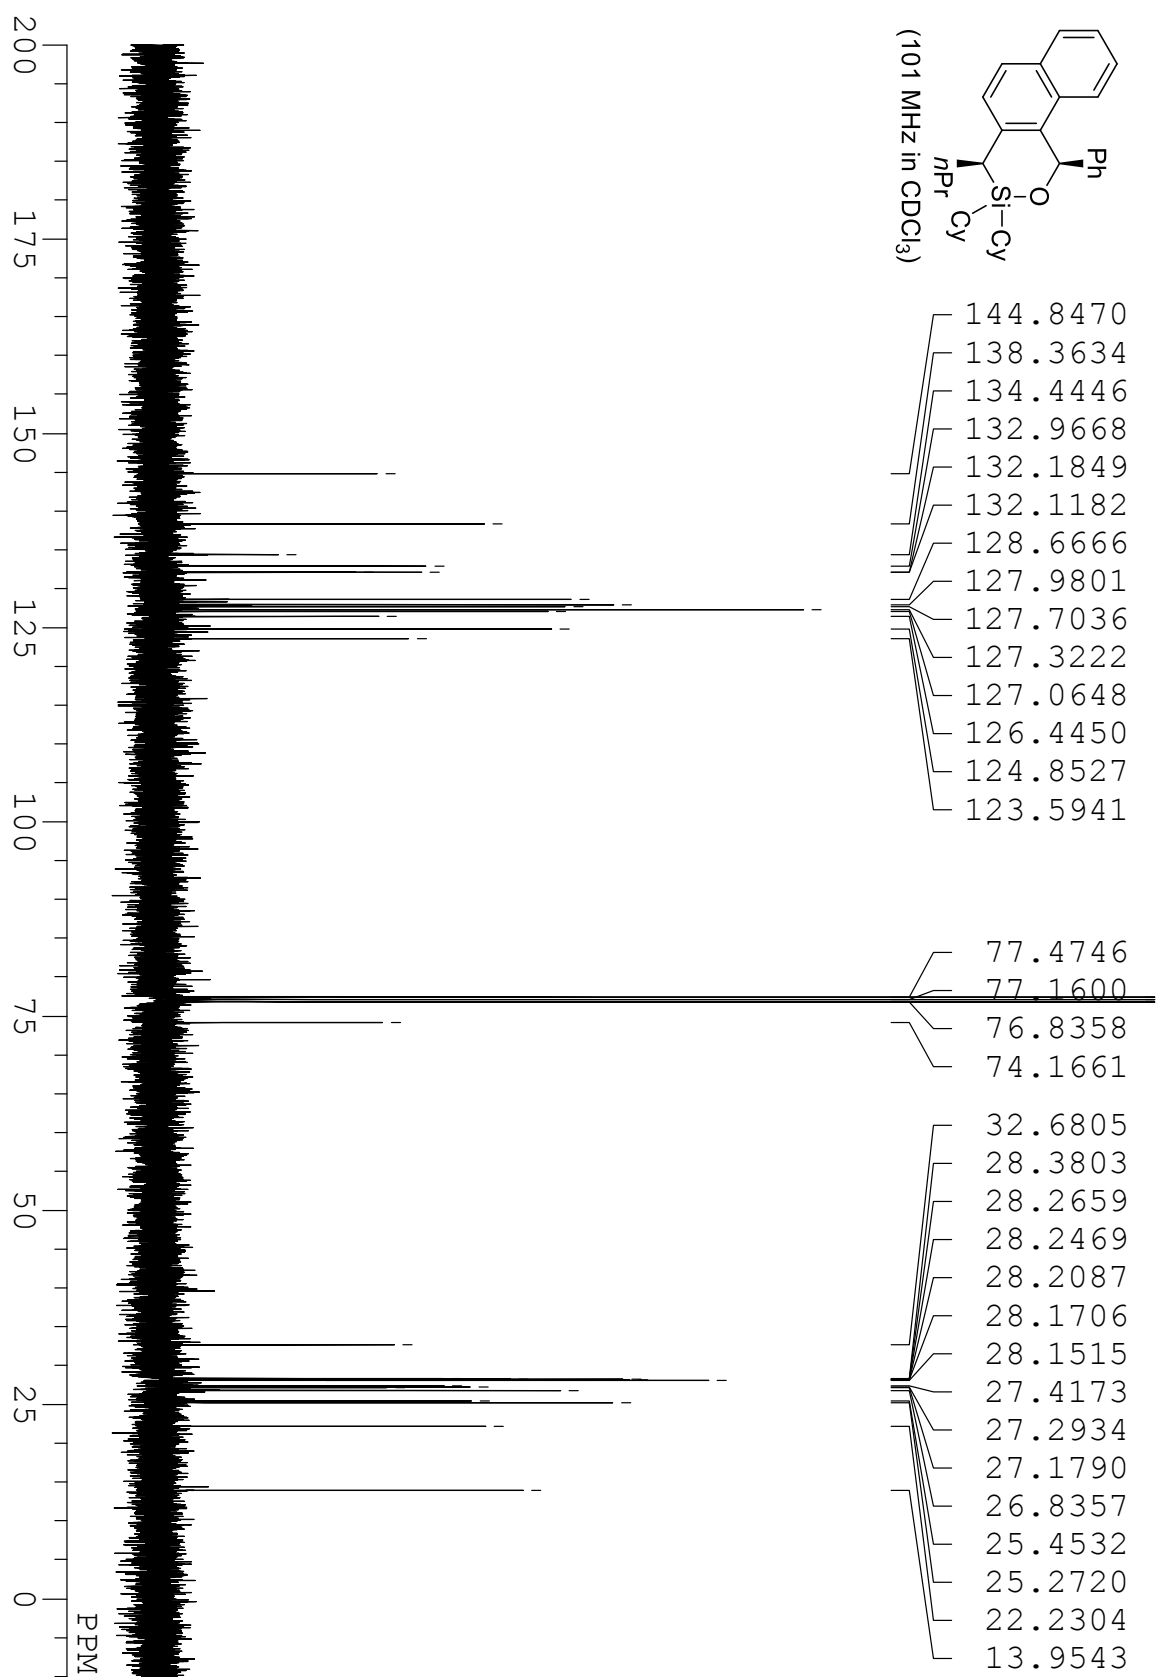

compound **6ia**

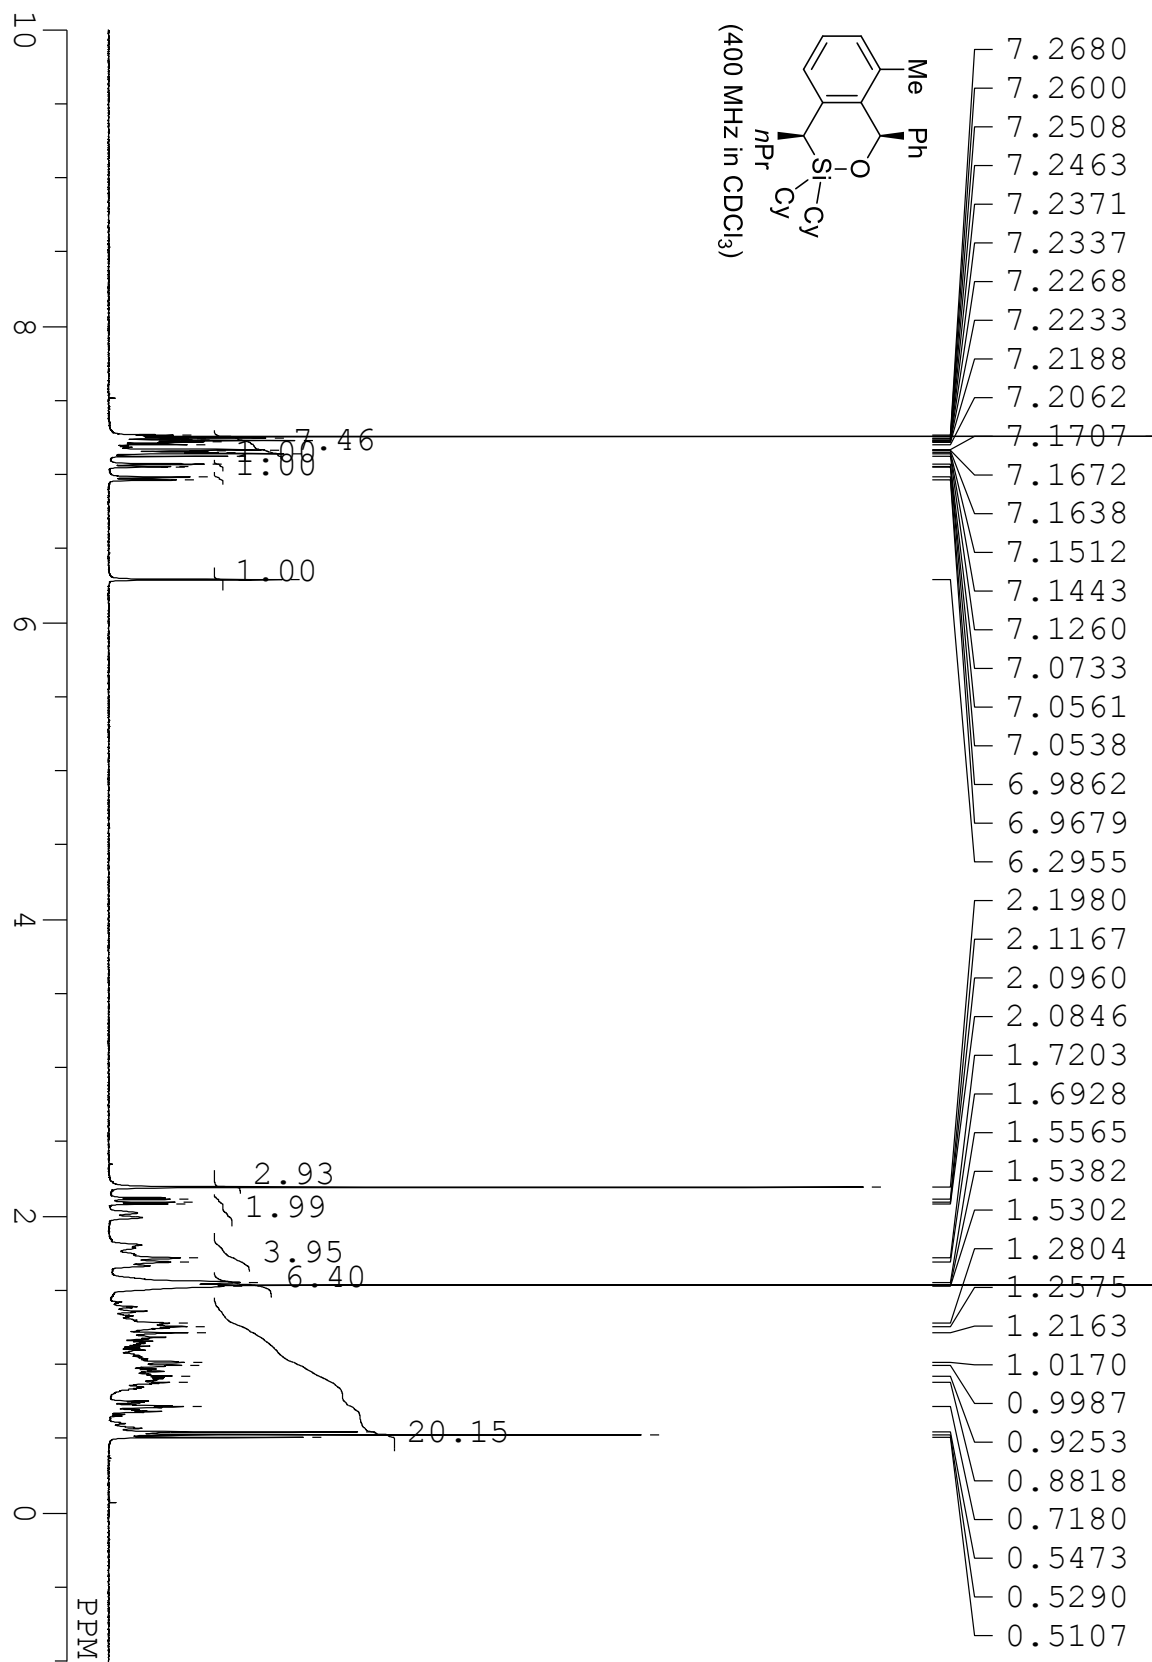

compound 6ia

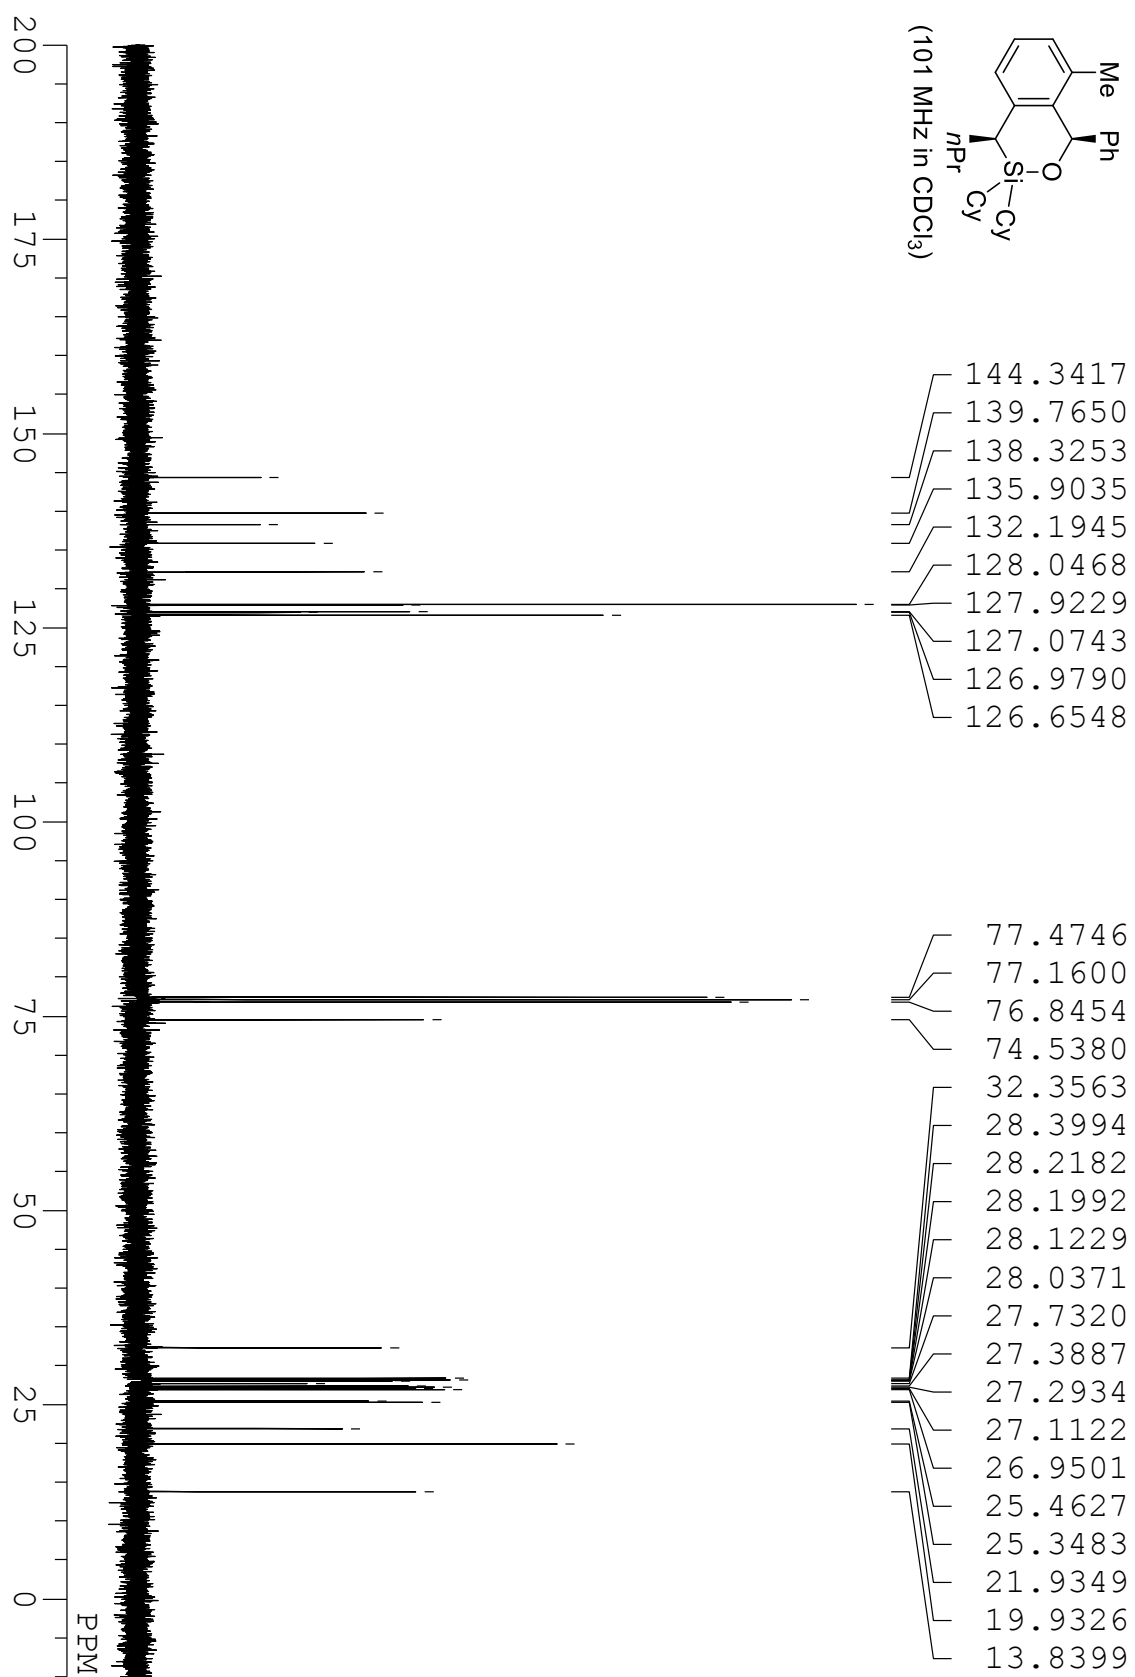

compound **6qa**

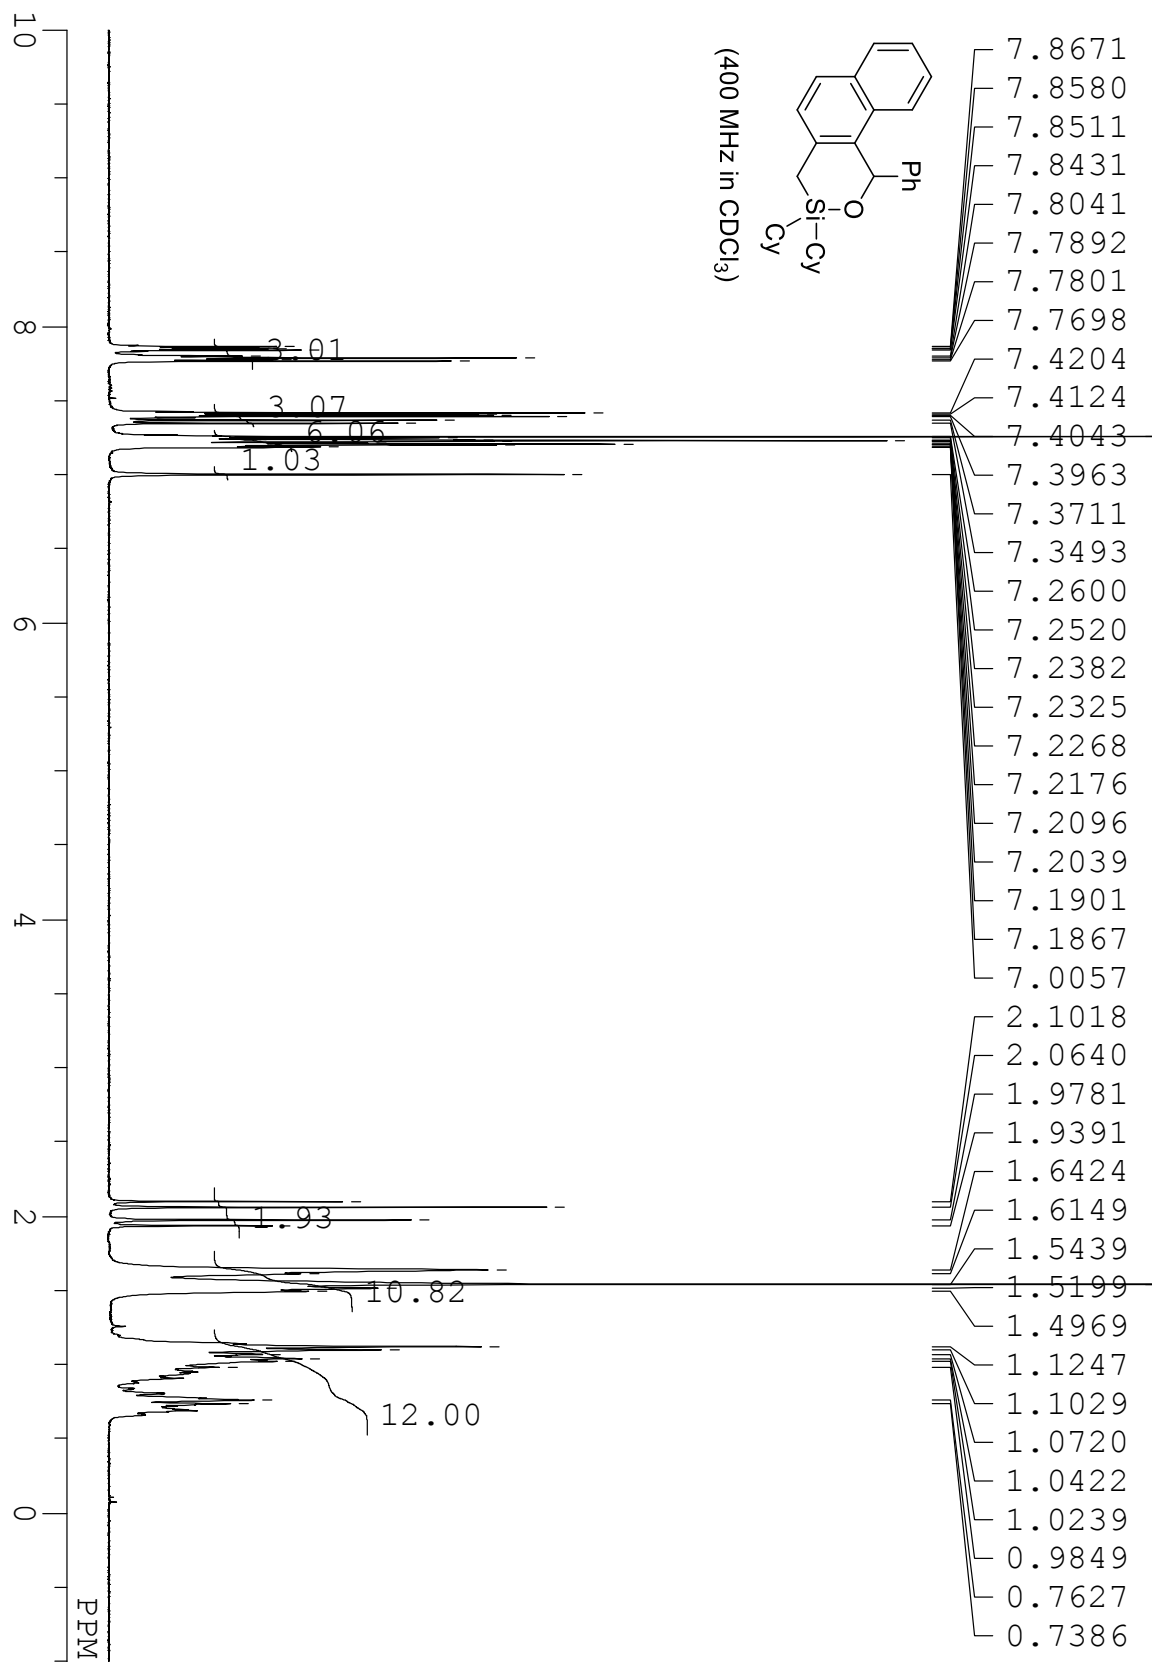

compound 6qa

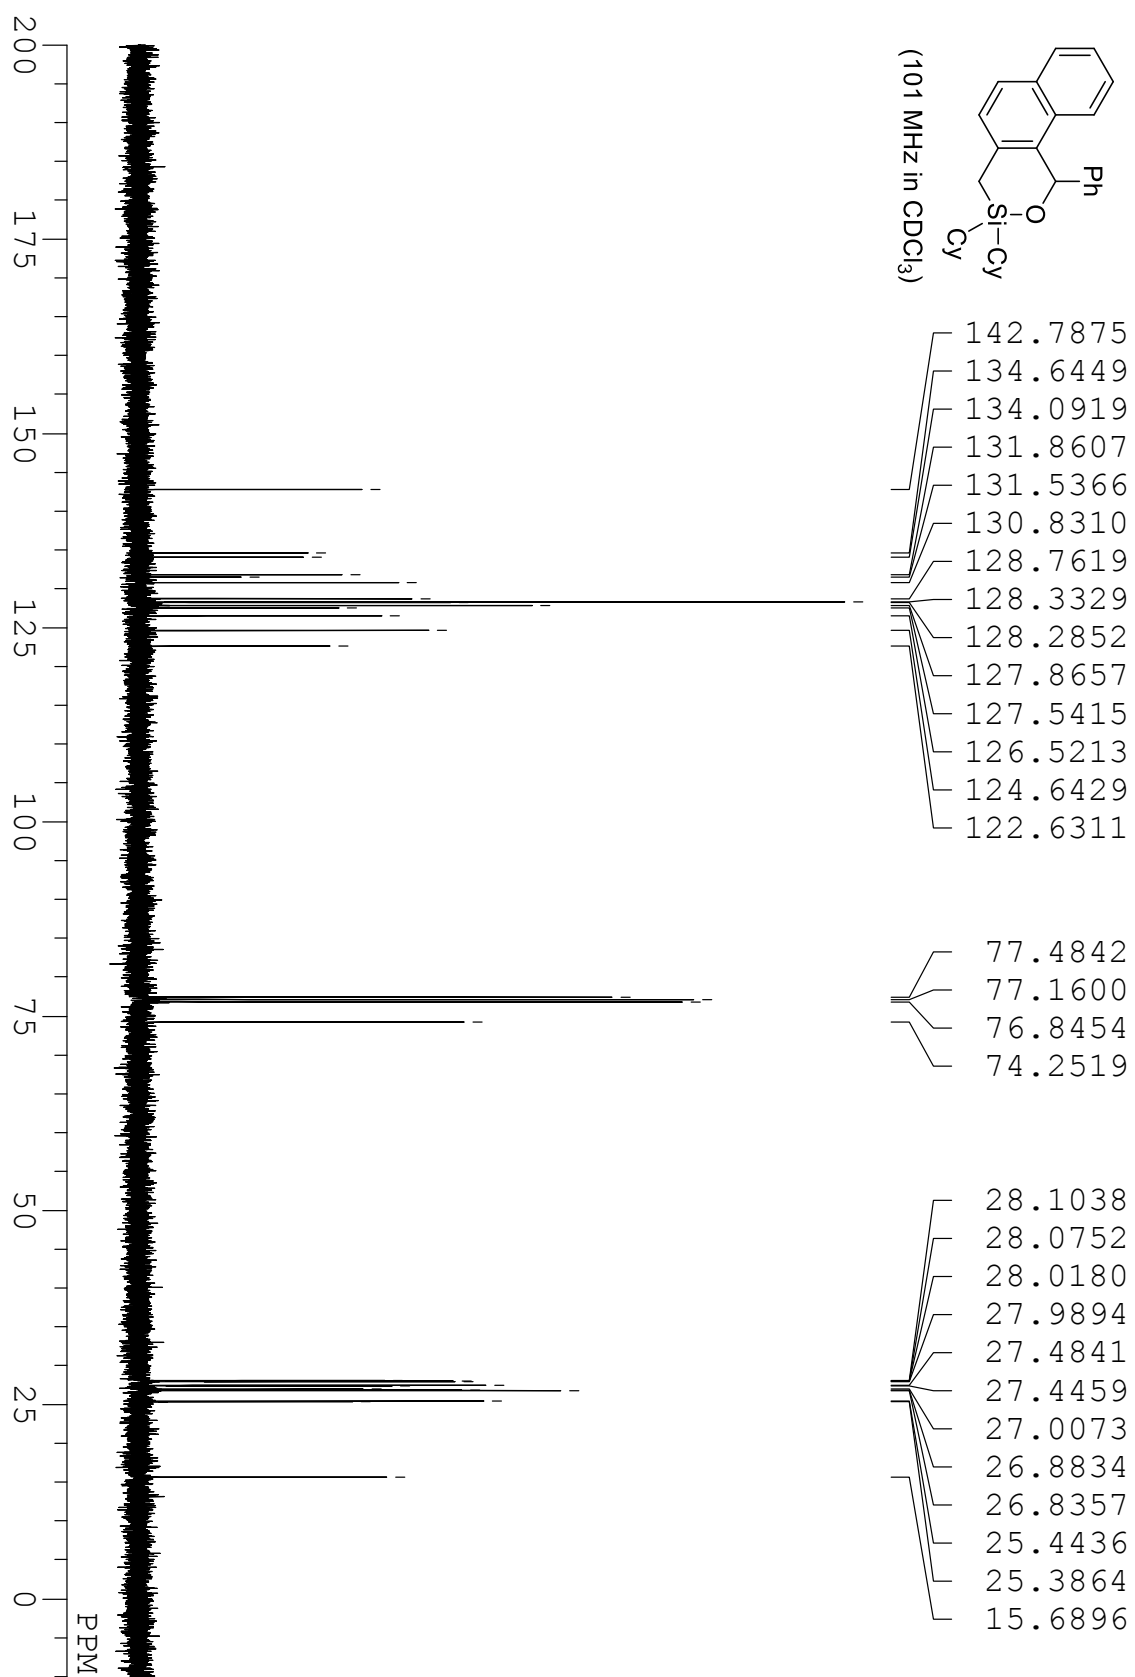



compound 6qb

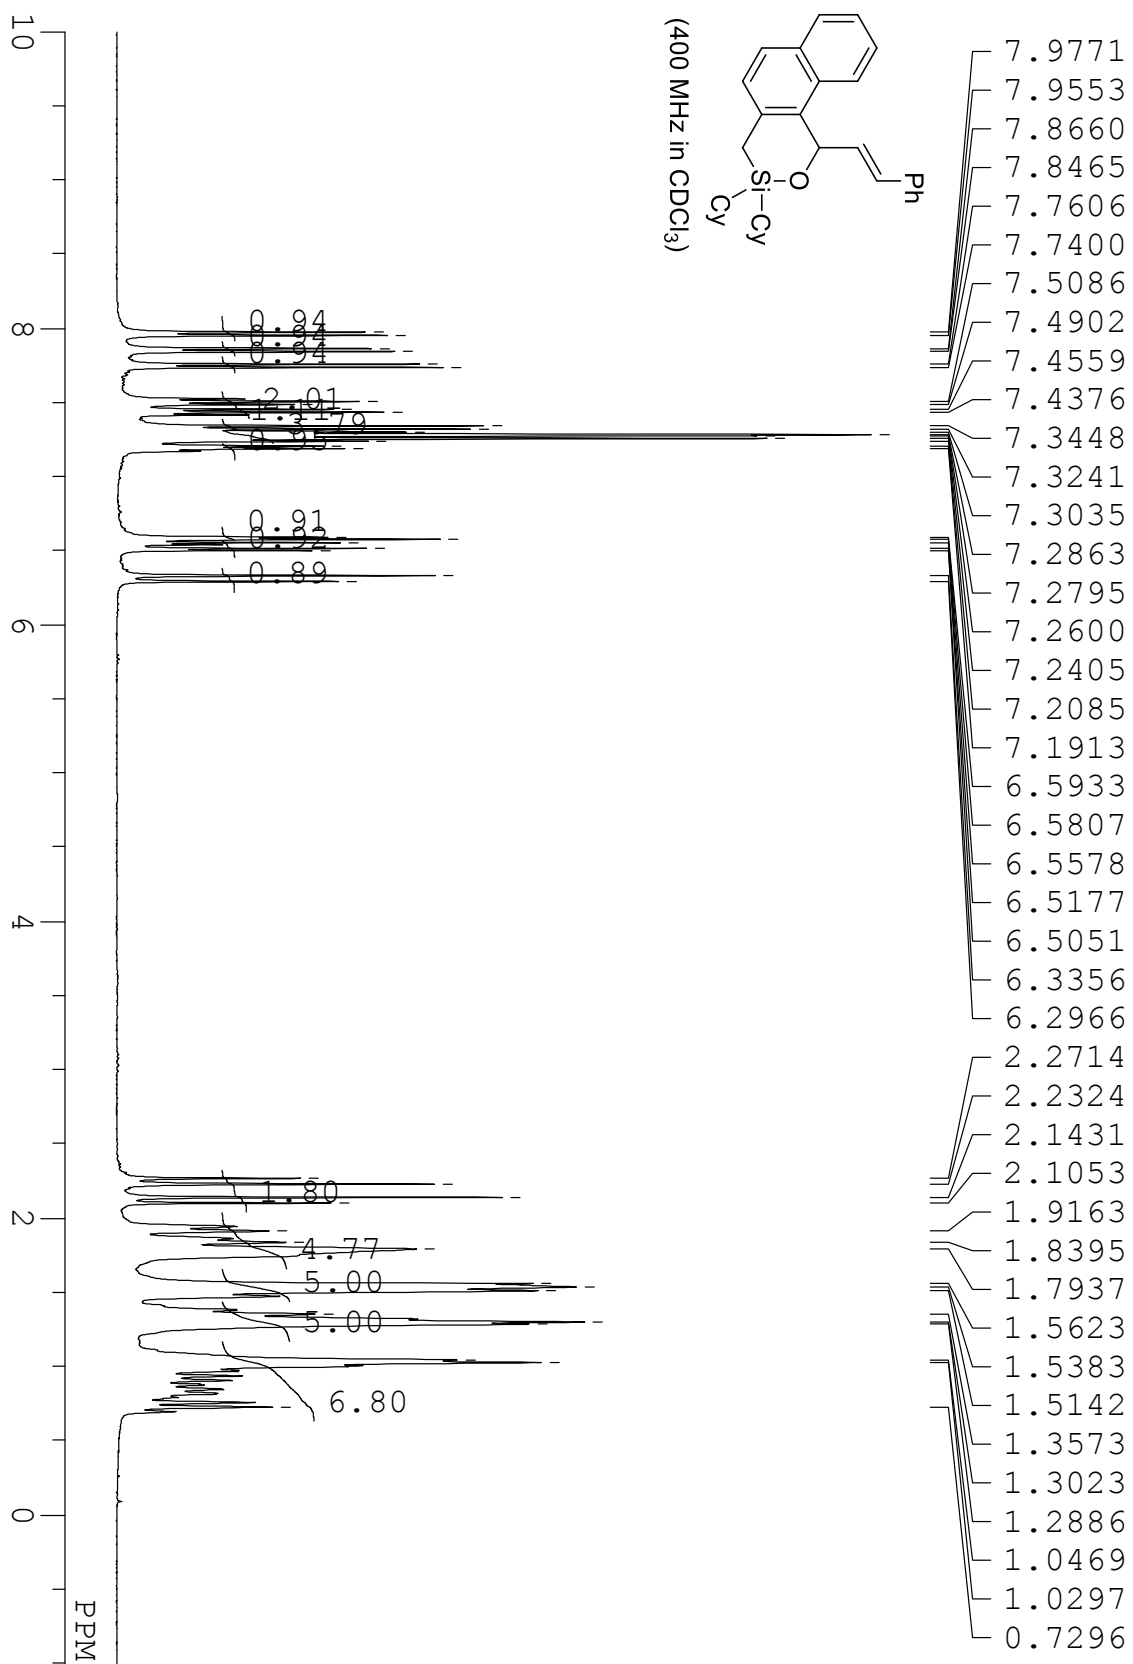

compound 6qb

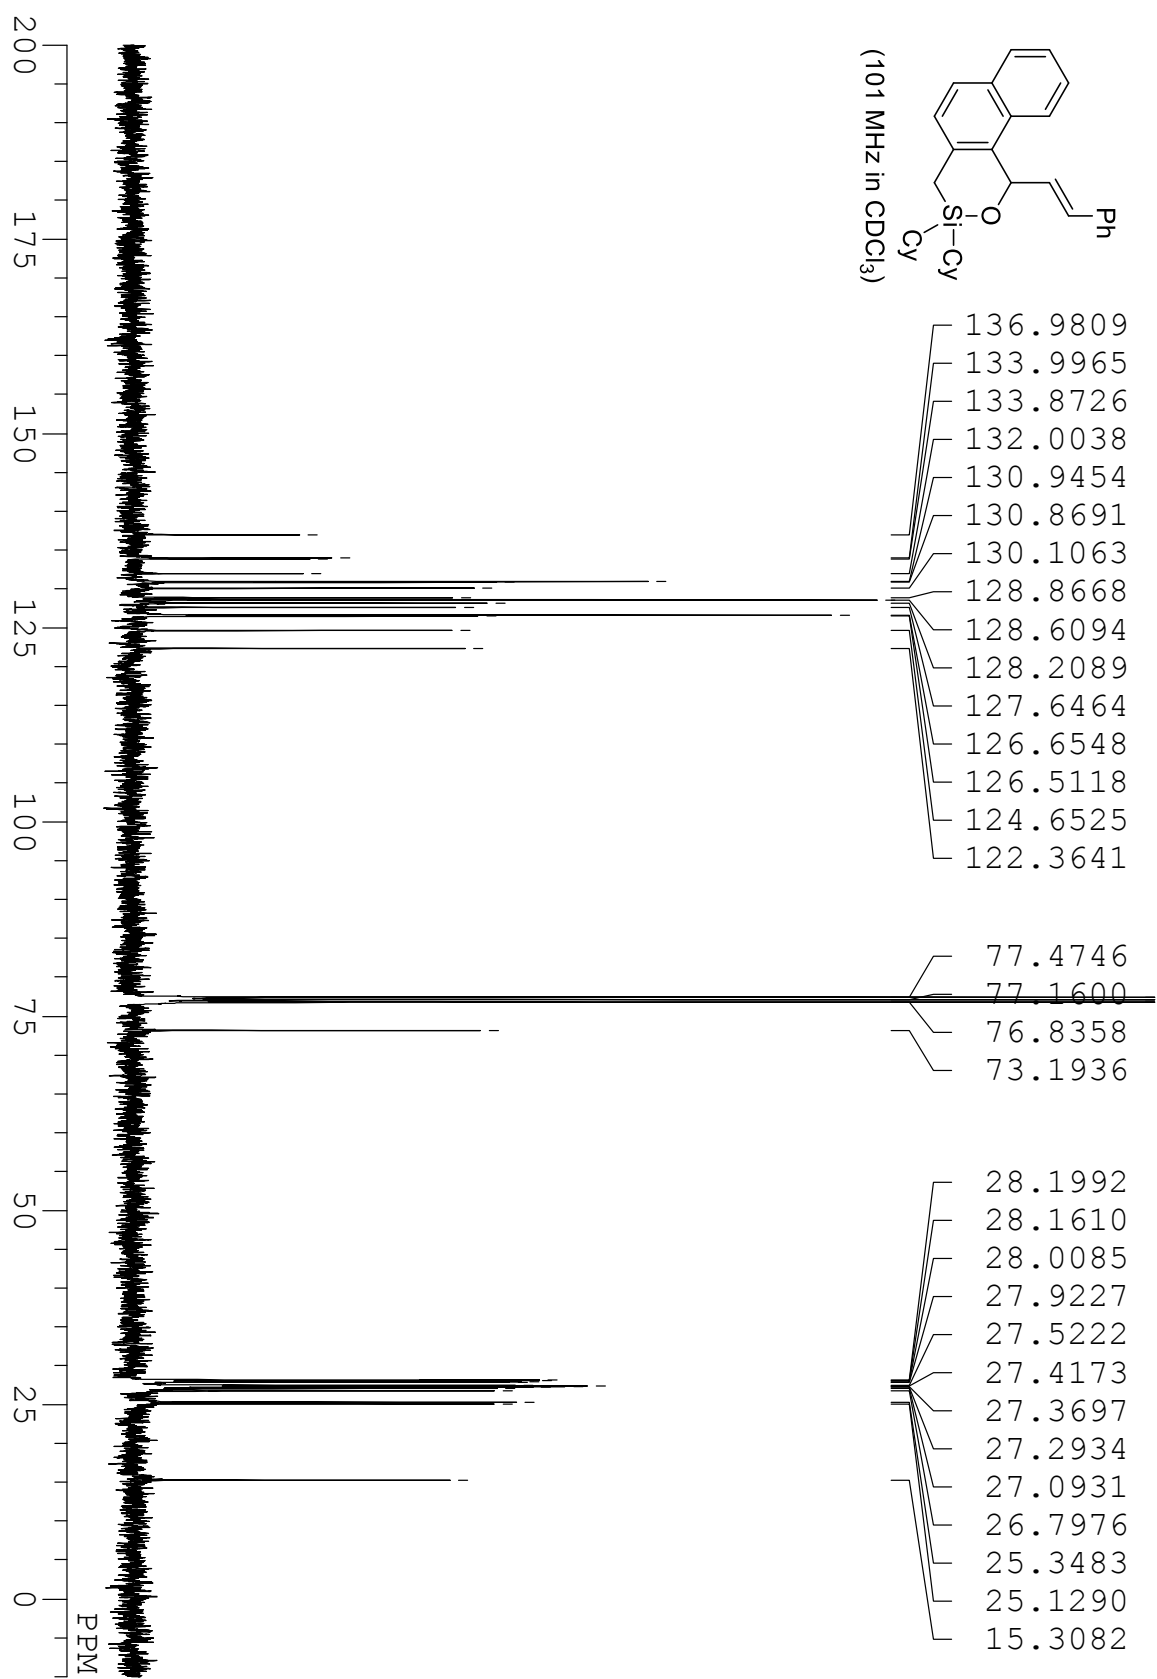

## VI. References

1. Li, C.; Qiang, X. Y.; Qi, Z. C.; Cao, B.; Li, J. Y.; Yang, S.-D. *Org. Lett.* **2019**, *21*, 7138.
2. Klare, H. F. T.; Bergander, K.; Oestreich, M. *Angew. Chem., Int. Ed.* **2009**, *48*, 9077.
3. Coulson, D. R.; Satek, L. C.; Grim, S. O. *Inorg. Synth.* **1972**, *13*, 121.
